# Supplementary material for: Comparative Analysis of Gut Microbiota between Wild and Captive Golden Snub-Nosed Monkeys
Source: Animals (Basel). 2023 May 12;13(10):1625. doi: 10.3390/ani13101625 (PMC10215246; doi:10.3390/ani13101625)
Supplement: Supplementary file 1 [file animals-13-01625-s001.zip]

Archive with 6 entries (6 files):
- supplement Figure S1.pdf
- supplement Figure S2.pdf
- Table S1.xlsx
- Table S2.xlsx
- Table S3.xlsx
- Table S4.xlsx
