# Supplementary material for: Comparative Analysis of Gut Microbiota between Wild and Captive Golden Snub-Nosed Monkeys
Source: Animals (Basel). 2023 May 12;13(10):1625. doi: 10.3390/ani13101625 (PMC10215246; doi:10.3390/ani13101625)
Supplement: Supplementary file 1 [file animals-13-01625-s001.zip › Table S1.xlsx]

## Sheet: metadata_of_the_samples
Sample ID	Situation	Location	Host	Longitude and Latitude	Altitude
R01	captive	Shanghai Wild Animal Park	Rhinopithecus roxellana	E:121°21'47.48" N:31°11'33.65"	4m
R02	captive	Shanghai Wild Animal Park	Rhinopithecus roxellana	E:121°21'47.48" N:31°11'33.65"	4m
R03	captive	Shanghai Wild Animal Park	Rhinopithecus roxellana	E:121°21'47.48" N:31°11'33.65"	4m
R04	captive	Shanghai Wild Animal Park	Rhinopithecus roxellana	E:121°21'47.48" N:31°11'33.65"	4m
R05	captive	Shanghai Wild Animal Park	Rhinopithecus roxellana	E:121°21'47.48" N:31°11'33.65"	4m
R06	captive	Shanghai Wild Animal Park	Rhinopithecus roxellana	E:121°21'47.48" N:31°11'33.65"	4m
R07	captive	Shanghai Wild Animal Park	Rhinopithecus roxellana	E:121°21'47.48" N:31°11'33.65"	4m
R08	captive	Shanghai Wild Animal Park	Rhinopithecus roxellana	E:121°21'47.48" N:31°11'33.65"	4m
R09	captive	Shanghai Wild Animal Park	Rhinopithecus roxellana	E:121°21'47.48" N:31°11'33.65"	4m
R10	captive	Shanghai Wild Animal Park	Rhinopithecus roxellana	E:104°14'4'' N:32°37'11''	4m
R14	wild	Mianyang City Sichuan Province	Rhinopithecus roxellana	E:104°14'4'' N:32°37'11''	1992m
R15	wild	Mianyang City Sichuan Province	Rhinopithecus roxellana	E:104°14'4'' N:32°37'11''	1992m
R16	wild	Mianyang City Sichuan Province	Rhinopithecus roxellana	E:104°14'4'' N:32°37'11''	1992m
R17	wild	Mianyang City Sichuan Province	Rhinopithecus roxellana	E:104°14'4'' N:32°37'11''	1992m
R18	wild	Mianyang City Sichuan Province	Rhinopithecus roxellana	E:104°14'4'' N:32°37'11''	1992m
R19	wild	Mianyang City Sichuan Province	Rhinopithecus roxellana	E:104°14'4'' N:32°37'11''	1992m
R20	wild	Mianyang City Sichuan Province	Rhinopithecus roxellana	E:104°14'4'' N:32°37'11''	1992m
R21	wild	Mianyang City Sichuan Province	Rhinopithecus roxellana	E:104°14'4'' N:32°37'11''	1992m
R22	wild	Mianyang City Sichuan Province	Rhinopithecus roxellana	E:104°14'4'' N:32°37'11''	1992m

## Sheet: data_information
Samples	cohorts	Raw data(bp)	Clean data(bp)	Clean Reads	GC(%)	Q20(%)	Q30(%)
R01	CRr	14317785702	12186463986	40667864	45.6	96.88	91.5
R02	CRr	17300231298	14517350046	48443498	44.94	96.94	91.61
R03	CRr	16861851838	14013935812	46771115	45.38	97.07	91.92
R04	CRr	13450750646	11662030616	38923372	45.86	96.62	90.96
R05	CRr	13712497372	11794781420	39362578	44.17	96.99	91.75
R06	CRr	12118117008	10471152762	34943121	44.42	97.08	91.91
R08	CRr	17187996320	14559719580	48600487	45.96	97.83	93.76
R09	CRr	13304771300	11290051384	37675240	45.89	96.58	90.93
R10	CRr	13712826534	11806319738	39399962	45.38	96.85	91.44
R14	WRr	12853440760	11001736628	36712921	46.68	96.93	91.61
R15	WRr	12857630872	10946885544	36528733	46.98	96.95	91.72
R16	WRr	14347275118	12279520452	40979112	47.5	96.6	90.97
R17	WRr	13450861010	11033078740	36820642	45.82	96.94	91.78
R18	WRr	14351430404	12216124680	40765534	47.16	96.91	91.58
R19	WRr	14432373440	12150513354	40546789	45.84	97.08	91.94
R20	WRr	12114941382	10381755368	34646235	47.15	96.92	91.64
R21	WRr	13551597756	11532109556	38485919	46.22	96.69	91.16
R22	WRr	13482764968	11457770506	38233950	45.04	96.9	91.58
