# Supplementary material for: Comparative Analysis of Gut Microbiota between Wild and Captive Golden Snub-Nosed Monkeys
Source: Animals (Basel). 2023 May 12;13(10):1625. doi: 10.3390/ani13101625 (PMC10215246; doi:10.3390/ani13101625)
Supplement: Supplementary file 1 [file animals-13-01625-s001.zip › Table S3.xlsx]

## Sheet: K_numbers
sample	R01	R02	R03	R04	R05	R06	R08	R09	R10	R14	R15	R16	R17	R18	R19	R20	R21	R22	p_value	p-fdr-value	beta
group	CRr	CRr	CRr	CRr	CRr	CRr	CRr	CRr	CRr	WRr	WRr	WRr	WRr	WRr	WRr	WRr	WRr	WRr	-	-	-
K01318	9.92e-06	9.92e-06	0	0	4.55e-06	4.28e-06	1e-05	1.09e-05	7.3e-06	9.37e-06	9.86e-06	5.67e-06	0	6.07e-06	4.07e-06	6.3e-06	9.62e-06	5.92e-06	0.999508	0.999508	-0.000278447
K06295	0.000302519	0.000370257	0.000304917	0.000327958	0.000350456	0.000333637	0.000276901	0.000250218	0.000273645	0.000351199	0.000399341	0.000311988	0.000252256	0.000297514	0.000232175	0.000302538	0.000264456	0.000378875	0.999372	0.999508	0.00134291
K01668	0	3.31e-06	0	0	0	0	0	5.44e-06	0	0	0	0	4.67e-06	0	4.07e-06	0	0	0	0.999059	0.999467	0.0001569
K01142	0.000699266	0.000690925	0.000709956	0.00074536	0.000659949	0.000744267	0.000713938	0.000609225	0.000726071	0.000730494	0.00069515	0.000663683	0.000700712	0.000667889	0.000741332	0.000743738	0.000663544	0.000692631	0.99895	0.999467	-0.00650906
K00187	0	9.92e-06	1.37e-05	4.26e-06	4.55e-06	0	1.67e-05	5.44e-06	1.09e-05	9.37e-06	4.93e-06	1.13e-05	0	6.07e-06	0	6.3e-06	9.62e-06	1.78e-05	0.997418	0.998234	0.00110445
K01419	0.000262845	0.000294222	0.000268509	0.000238515	0.000213914	0.000171096	0.000293582	0.000190383	0.000269996	0.000243498	0.000285948	0.00024959	0.000205542	0.000279299	0.000146637	0.000302538	0.000163482	0.000325596	0.996792	0.997811	0.00492732
K10974	5.46e-05	7.93e-05	8.19e-05	3.41e-05	4.55e-05	4.71e-05	9.34e-05	7.62e-05	6.57e-05	7.49e-05	5.92e-05	7.37e-05	4.2e-05	8.5e-05	4.07e-05	7.56e-05	4.33e-05	8.29e-05	0.99514	0.996361	0.00552792
K03098	9.92e-06	1.32e-05	2.28e-05	1.28e-05	1.37e-05	0	1.33e-05	1.63e-05	1.09e-05	4.68e-06	1.48e-05	1.13e-05	9.34e-06	1.82e-05	8.15e-06	2.52e-05	9.62e-06	1.18e-05	0.994808	0.996232	-0.00363045
K06933	0	3.31e-06	4.55e-06	0	0	0	0	0	3.65e-06	0	0	5.67e-06	0	0	0	0	0	5.92e-06	0.993478	0.995105	-0.00124397
K09119	4.96e-06	9.92e-06	9.1e-06	4.26e-06	4.55e-06	8.55e-06	1.33e-05	1.09e-05	1.46e-05	9.37e-06	4.93e-06	1.7e-05	9.34e-06	6.07e-06	4.07e-06	1.26e-05	4.81e-06	1.18e-05	0.993176	0.995005	0.00503592
K03382	0	0	4.55e-06	4.26e-06	0	0	0	0	3.65e-06	0	0	0	0	6.07e-06	0	6.3e-06	0	0	0.993142	0.995005	0.00131437
K21279	0	6.61e-06	0	4.26e-06	4.55e-06	4.28e-06	3.34e-06	0	3.65e-06	4.68e-06	4.93e-06	0	0	6.07e-06	0	6.3e-06	4.81e-06	0	0.993012	0.995005	-0.00264517
K02052	4.46e-05	1.65e-05	5.01e-05	4.26e-05	4.55e-05	3.85e-05	4.34e-05	4.9e-05	4.38e-05	3.75e-05	3.94e-05	3.4e-05	3.74e-05	6.07e-05	4.48e-05	5.04e-05	2.88e-05	4.14e-05	0.992385	0.994824	-0.0109897
K04029	0.000168617	0.000198352	0.000186591	0.000170368	0.000136541	0.000183928	0.000100085	0.00022846	0.000120404	0.000173258	0.000138044	0.000102105	0.000219556	0.000109291	0.000264761	0.000113452	0.000240415	0.000130238	0.992081	0.994723	0.00851538
K02888	0.00120016	0.00116036	0.00117871	0.00119684	0.0011697	0.00115917	0.00117433	0.0010607	0.00121498	0.00116598	0.00124733	0.00117421	0.00123325	0.00115363	0.00101424	0.00117233	0.00114918	0.00120766	0.990732	0.993573	-0.0639659
K06936	9.92e-06	9.92e-06	1.82e-05	1.28e-05	1.37e-05	1.28e-05	2e-05	1.09e-05	1.82e-05	4.68e-06	1.97e-05	2.27e-05	9.34e-06	1.82e-05	4.07e-06	1.89e-05	4.81e-06	2.37e-05	0.990144	0.993188	0.00730846
K07017	4.96e-06	6.61e-06	1.82e-05	1.28e-05	1.37e-05	1.71e-05	1.33e-05	2.18e-05	0	9.37e-06	4.93e-06	5.67e-06	1.87e-05	1.21e-05	2.85e-05	1.89e-05	4.81e-06	5.92e-06	0.989606	0.992851	-0.00553234
K00845	0.00133902	0.00122978	0.00125153	0.00126924	0.00122432	0.0012875	0.00126774	0.00122389	0.00126971	0.00125964	0.00130649	0.00129333	0.00126595	0.00129935	0.00122198	0.00120385	0.00136075	0.00115439	0.989139	0.992587	-0.0909743
K01887	0.000937314	0.0009587	0.000887445	0.000958319	0.00101496	0.000932473	0.00087741	0.000881201	0.000912149	0.000945897	0.000926866	0.000941636	0.000943625	0.00091683	0.000896116	0.000939127	0.000894343	0.000953108	0.987315	0.990959	0.112641
K02890	0.00122992	0.00125953	0.00126063	0.00124369	0.00122887	0.00123189	0.00121436	0.0011423	0.00122593	0.00127368	0.0012424	0.00117988	0.0012426	0.00117184	0.00112422	0.00124797	0.00122612	0.00133198	0.986738	0.990582	-0.110127
K00086	0	0	0	0	4.55e-06	0	0	0	0	0	0	0	4.67e-06	0	0	0	0	0	0.985544	0.989587	-0.00162659
K01646	0.00014878	0.000185128	0.000159285	0.000174627	0.000127438	0.000141154	0.000153463	0.000141427	0.000171484	0.000173258	0.000152834	0.000141813	0.000172842	0.000127506	0.000158857	0.00013236	0.000173099	0.000171678	0.985361	0.989587	-0.0417063
K10682	0	0	4.55e-06	0	0	0	0	0	0	4.68e-06	0	0	0	0	0	0	0	0	0.984356	0.9888	-0.00176017
K03438	0.00122	0.00120003	0.00119236	0.0011798	0.00120611	0.00122334	0.00115765	0.00110422	0.00112377	0.00120812	0.0011783	0.00116286	0.00117252	0.00112327	0.00116902	0.00114712	0.00123573	0.00121359	0.984303	0.9888	-0.161658
K17363	3.47e-05	9.92e-06	4.55e-06	8.52e-06	4.55e-06	8.55e-06	2e-05	1.09e-05	2.19e-05	1.4e-05	9.86e-06	1.7e-05	2.34e-05	6.07e-06	1.63e-05	6.3e-06	2.4e-05	5.92e-06	0.984161	0.9888	0.00846382
K02074	4.96e-06	3.31e-06	4.55e-06	0	9.1e-06	0	3.34e-06	5.44e-06	7.3e-06	4.68e-06	0	5.67e-06	4.67e-06	6.07e-06	0	0	4.81e-06	1.18e-05	0.983875	0.9888	0.0066463
K13641	0	3.31e-06	4.55e-06	4.26e-06	0	0	1e-05	0	7.3e-06	4.68e-06	9.86e-06	5.67e-06	0	0	4.07e-06	0	4.81e-06	0	0.982885	0.988133	0.0052614
K08984	0	3.31e-06	4.55e-06	0	0	4.28e-06	6.67e-06	0	7.3e-06	0	0	0	9.34e-06	6.07e-06	4.07e-06	6.3e-06	0	0	0.981709	0.987154	0.00532939
K02781	1.49e-05	2.31e-05	9.1e-06	2.13e-05	1.37e-05	1.28e-05	1e-05	5.44e-06	1.09e-05	4.68e-06	1.97e-05	1.7e-05	1.4e-05	1.82e-05	1.22e-05	6.3e-06	4.81e-06	2.37e-05	0.981012	0.986656	0.0135885
K02347	4.96e-06	0	0	0	0	0	1.33e-05	5.44e-06	3.65e-06	4.68e-06	0	0	0	6.07e-06	0	6.3e-06	4.81e-06	5.92e-06	0.979102	0.984938	-0.00567238
K03550	0.00119024	0.00121656	0.00120601	0.00120961	0.00123797	0.00123617	0.00118767	0.00112054	0.00121498	0.00125027	0.00120295	0.00126497	0.0011445	0.00123256	0.00110793	0.00122906	0.00119246	0.0011899	0.977997	0.984028	0.205329
K02076	4.96e-06	3.31e-06	0	0	9.1e-06	0	3.34e-06	0	0	4.68e-06	0	5.67e-06	0	0	0	0	4.81e-06	5.92e-06	0.977226	0.983454	-0.00593511
K03923	9.92e-06	9.92e-06	9.1e-06	8.52e-06	9.1e-06	4.28e-06	1e-05	1.09e-05	1.09e-05	4.68e-06	4.93e-06	1.13e-05	1.4e-05	1.21e-05	8.15e-06	1.26e-05	1.44e-05	0	0.976612	0.983039	0.0190265
K03492	0	9.92e-06	9.1e-06	8.52e-06	4.55e-06	8.55e-06	6.67e-06	0	3.65e-06	4.68e-06	4.93e-06	0	0	1.21e-05	0	1.89e-05	9.62e-06	0	0.9753	0.981919	0.00856857
K01493	0.00126463	0.00125292	0.00122877	0.00118832	0.00118336	0.00123189	0.00119101	0.00109878	0.00123323	0.00126432	0.00127691	0.00118555	0.00122391	0.0011597	0.00112829	0.00125427	0.00120688	0.00116623	0.975052	0.981872	0.200164
K04783	0	3.31e-06	4.55e-06	0	4.55e-06	4.28e-06	0	0	0	0	0	0	4.67e-06	6.07e-06	0	6.3e-06	0	0	0.974805	0.981826	-0.00619807
K02022	0	3.31e-06	4.55e-06	4.26e-06	4.55e-06	4.28e-06	0	0	0	0	4.93e-06	5.67e-06	0	0	0	0	4.81e-06	5.92e-06	0.972429	0.979634	-0.00856992
K07775	9.92e-06	1.65e-05	2.28e-05	8.52e-06	9.1e-06	1.71e-05	2e-05	1.09e-05	1.46e-05	0	9.86e-06	1.13e-05	4.2e-05	6.07e-06	3.67e-05	6.3e-06	9.62e-06	5.92e-06	0.971888	0.97929	0.0123337
K02477	0.000153739	0.00015207	0.000168387	0.000187405	0.000150195	0.000158264	0.000140119	0.000157746	0.000175133	0.000135797	0.000187345	0.00018152	0.000121457	0.000230725	0.000138491	0.000207995	0.000120207	0.000124318	0.971518	0.979119	-0.0495375
K00186	0	3.31e-06	1.37e-05	0	0	0	3.34e-06	0	7.3e-06	4.68e-06	0	5.67e-06	0	0	0	0	4.81e-06	1.18e-05	0.97116	0.97896	0.00667026
K11103	4.96e-06	6.61e-06	9.1e-06	8.52e-06	9.1e-06	4.28e-06	6.67e-06	5.44e-06	7.3e-06	9.37e-06	0	0	4.67e-06	1.21e-05	8.15e-06	1.26e-05	1.44e-05	0	0.970332	0.978327	0.0159339
K03495	0.000952192	0.000962006	0.000860139	0.000873136	0.00099675	0.000881144	0.000914107	0.000848564	0.000897555	0.000964627	0.000867705	0.000913273	0.000952968	0.000856112	0.000900189	0.000939127	0.000860685	0.000923509	0.970166	0.978327	0.199496
K03070	0.000867883	0.000859524	0.000787323	0.000813507	0.000901172	0.000778486	0.000827367	0.000750653	0.000769854	0.000889705	0.000774032	0.000788478	0.000822169	0.000795395	0.000830944	0.000743738	0.000802985	0.000899829	0.969182	0.97757	0.16659
K13934	0	3.31e-06	0	4.26e-06	4.55e-06	4.28e-06	3.34e-06	5.44e-06	3.65e-06	0	0	0	0	1.21e-05	0	1.26e-05	4.81e-06	0	0.968859	0.977446	-0.00843084
K15534	3.47e-05	3.31e-05	1.82e-05	2.56e-05	1.37e-05	1.28e-05	2.34e-05	3.26e-05	2.55e-05	1.4e-05	2.96e-05	2.84e-05	1.87e-05	1.82e-05	5.3e-05	1.89e-05	2.88e-05	1.18e-05	0.968485	0.97727	-0.0246584
K00578	0	3.31e-06	4.55e-06	0	0	0	3.34e-06	0	0	0	0	5.67e-06	0	0	0	0	0	5.92e-06	0.967946	0.976927	-0.00608446
K01499	0	3.31e-06	4.55e-06	0	0	0	3.34e-06	0	0	0	0	5.67e-06	0	0	0	0	0	5.92e-06	0.967946	0.976927	-0.00608446
K06865	0	3.31e-06	4.55e-06	0	0	0	3.34e-06	0	0	0	0	5.67e-06	0	0	0	0	0	5.92e-06	0.967946	0.976927	-0.00608446
K14096	0	3.31e-06	4.55e-06	0	0	0	3.34e-06	0	0	0	0	5.67e-06	0	0	0	0	0	5.92e-06	0.967946	0.976927	-0.00608446
K13574	4.96e-06	0	0	0	0	0	0	0	0	4.68e-06	0	0	0	0	0	0	0	0	0.967757	0.976927	0.00362726
K01745	0.000153739	0.000155375	0.000172938	0.000119258	9.1e-05	0.000128322	0.000133446	0.000168625	0.000116755	0.000131114	0.000142974	0.00011345	0.000172842	0.000151793	0.000138491	0.000126057	0.000110591	0.000147998	0.96745	0.976927	0.0640595
K03522	0.000337235	0.00034381	0.00040959	0.00037055	0.000368661	0.000359301	0.000440373	0.000413403	0.000412291	0.00036993	0.000374691	0.000391403	0.000359699	0.000394662	0.000391032	0.000415989	0.000360622	0.000402555	0.965573	0.975739	-0.154722
K02624	4.96e-06	0	4.55e-06	4.26e-06	0	4.28e-06	0	0	0	4.68e-06	9.86e-06	0	0	0	4.07e-06	0	0	0	0.965303	0.975667	-0.00798733
K06296	0	2.64e-05	2.73e-05	2.56e-05	2.73e-05	2.99e-05	1.67e-05	1.63e-05	1.82e-05	2.34e-05	3.94e-05	2.27e-05	2.34e-05	1.21e-05	1.22e-05	2.52e-05	1.92e-05	1.18e-05	0.96527	0.975667	-0.0271161
K01685	0.000228129	0.00024794	0.000195693	0.000234256	0.000213914	0.000205315	0.000250212	0.000271976	0.000226213	0.000215402	0.000207066	0.000255263	0.000242913	0.000230725	0.000276981	0.000239509	0.000211565	0.000189438	0.965254	0.975667	0.105905
K18979	0.000173577	0.000155375	0.000177489	0.000127776	0.000122887	0.000141154	0.000143455	0.000157746	0.000127701	0.000154528	0.000162695	0.000141813	0.000163499	0.000151793	0.000134417	0.000170177	0.000139441	0.000112479	0.96406	0.975015	-0.0945061
K21746	4.96e-06	9.92e-06	4.55e-06	4.26e-06	0	0	3.34e-06	5.44e-06	3.65e-06	0	0	0	1.4e-05	0	1.63e-05	0	4.81e-06	0	0.963464	0.974614	0.00954155
K02887	0.00112577	0.00115044	0.00122422	0.00118832	0.00124708	0.00112496	0.0011076	0.00101719	0.00111647	0.00114725	0.00120295	0.0011345	0.0011118	0.00111112	0.00107127	0.00117864	0.0011011	0.00123135	0.963401	0.974614	0.23169
K03093	4.96e-06	3.31e-06	9.1e-06	1.28e-05	1.82e-05	8.55e-06	2e-05	2.18e-05	1.82e-05	9.37e-06	1.97e-05	1.7e-05	0	2.43e-05	1.22e-05	2.52e-05	4.81e-06	5.92e-06	0.963218	0.974614	-0.020431
K01894	9.92e-06	3.31e-06	1.82e-05	8.52e-06	4.55e-06	8.55e-06	1e-05	1.09e-05	1.09e-05	9.37e-06	4.93e-06	5.67e-06	9.34e-06	1.21e-05	8.15e-06	1.89e-05	9.62e-06	5.92e-06	0.963035	0.974614	0.0275108
K03924	0.000733981	0.000753736	0.000800976	0.000839062	0.000832901	0.000812706	0.00076398	0.000832245	0.000809988	0.000772638	0.000872635	0.000918946	0.000696041	0.000837897	0.000733186	0.000819372	0.000687586	0.00082879	0.962961	0.974614	0.159791
K02970	0.00110593	0.00104465	0.00111044	0.00107332	0.00105137	0.00105224	0.00104422	0.000973673	0.00102161	0.00106296	0.00109942	0.000975671	0.00113515	0.00113541	0.000981654	0.00103367	0.00103378	0.00103007	0.962663	0.974614	-0.259064
K17818	1.98e-05	1.65e-05	9.1e-06	8.52e-06	1.37e-05	2.14e-05	1e-05	2.72e-05	7.3e-06	9.37e-06	1.48e-05	1.7e-05	2.34e-05	6.07e-06	2.85e-05	1.26e-05	1.44e-05	5.92e-06	0.962563	0.974614	0.0258402
K20415	0	3.31e-06	0	4.26e-06	4.55e-06	4.28e-06	3.34e-06	0	3.65e-06	0	0	5.67e-06	0	6.07e-06	0	6.3e-06	4.81e-06	0	0.961103	0.973634	0.0131317
K00329	4.96e-06	0	4.55e-06	0	0	0	0	5.44e-06	0	4.68e-06	4.93e-06	0	0	0	0	0	4.81e-06	0	0.96002	0.972739	0.00897832
K00356	4.96e-06	0	4.55e-06	0	0	0	0	5.44e-06	0	4.68e-06	4.93e-06	0	0	0	0	0	4.81e-06	0	0.96002	0.972739	0.00897832
K00625	0.000679429	0.000684313	0.000700854	0.000715545	0.000723668	0.000701493	0.000620525	0.000614665	0.000682288	0.000735177	0.000754311	0.000601285	0.000705383	0.000655746	0.000741332	0.000623984	0.000658736	0.000657112	0.959728	0.972739	-0.195881
K03301	4.96e-06	1.32e-05	1.37e-05	2.56e-05	2.28e-05	4.28e-06	6.67e-06	5.44e-06	7.3e-06	9.37e-06	1.48e-05	0	1.4e-05	1.82e-05	1.63e-05	1.89e-05	4.81e-06	5.92e-06	0.958331	0.97163	0.0220019
K13005	0	1.32e-05	0	8.52e-06	9.1e-06	0	1e-05	5.44e-06	0	4.68e-06	4.93e-06	5.67e-06	4.67e-06	6.07e-06	4.07e-06	6.3e-06	4.81e-06	5.92e-06	0.957674	0.971165	-0.0197196
K01147	2.98e-05	1.65e-05	3.64e-05	1.28e-05	1.82e-05	1.71e-05	2.34e-05	2.72e-05	2.92e-05	1.87e-05	2.96e-05	1.7e-05	1.4e-05	3.64e-05	1.22e-05	3.78e-05	1.92e-05	2.37e-05	0.957151	0.970836	0.0390132
K00579	0	6.61e-06	0	0	0	0	6.67e-06	0	3.65e-06	4.68e-06	0	5.67e-06	0	0	0	0	0	5.92e-06	0.957044	0.970836	0.00941002
K07171	0.00142829	0.00142483	0.00138806	0.00156738	0.00154747	0.00154842	0.00138451	0.00144147	0.00134268	0.00155464	0.0014889	0.00147485	0.00151821	0.00129935	0.00136047	0.0013299	0.00148095	0.0015451	0.956897	0.970836	0.237495
K15521	0	0	4.55e-06	0	0	0	0	0	0	0	4.93e-06	0	0	0	0	0	0	0	0.955531	0.969796	-0.00500151
K12986	0	3.31e-06	4.55e-06	4.26e-06	4.55e-06	0	0	0	0	0	4.93e-06	0	0	6.07e-06	0	6.3e-06	0	0	0.954966	0.969424	-0.0110869
K06313	2.98e-05	1.32e-05	1.37e-05	2.13e-05	2.28e-05	2.57e-05	2.34e-05	1.09e-05	2.19e-05	3.28e-05	1.97e-05	2.27e-05	2.34e-05	1.21e-05	2.44e-05	1.26e-05	9.62e-06	2.37e-05	0.954947	0.969424	0.0445533
K20448	0	0	1.37e-05	4.26e-06	4.55e-06	4.28e-06	1e-05	1.09e-05	1.46e-05	1.4e-05	1.48e-05	5.67e-06	4.67e-06	1.21e-05	0	0	9.62e-06	0	0.954542	0.969394	0.0180433
K07448	0.000183495	0.000158681	0.000159285	0.000144813	0.000168401	0.000171096	0.000170144	0.000146867	0.000175133	0.000135797	0.000182415	0.000209883	0.000135471	0.000163936	0.000134417	0.000163874	0.000163482	0.000183518	0.95345	0.968486	0.126573
K15669	1.98e-05	2.64e-05	1.82e-05	1.28e-05	1.37e-05	1.71e-05	2.34e-05	1.63e-05	1.82e-05	0	1.97e-05	1.7e-05	1.87e-05	3.04e-05	1.63e-05	3.15e-05	4.81e-06	2.96e-05	0.953385	0.968486	-0.034866
K03043	0.0007439	0.000750431	0.000696303	0.000681472	0.000778284	0.000692938	0.000683912	0.000718016	0.000689585	0.000721129	0.000645848	0.000686373	0.000766112	0.000746821	0.000684307	0.000743738	0.000697203	0.000734071	0.953234	0.968486	0.308677
K00055	0	6.61e-06	4.55e-06	8.52e-06	2.28e-05	0	3.34e-06	5.44e-06	7.3e-06	4.68e-06	4.93e-06	1.13e-05	0	1.21e-05	4.07e-06	6.3e-06	4.81e-06	1.18e-05	0.953084	0.968486	-0.0185025
K03100	0.00188455	0.00181161	0.00190687	0.0019209	0.00186606	0.00199327	0.00185824	0.00190383	0.00200673	0.00192457	0.00194247	0.00197403	0.00197601	0.00172437	0.0019796	0.00174589	0.00198102	0.00188254	0.952473	0.968298	0.364404
K01507	0.000649673	0.000763654	0.000582528	0.000626102	0.000669052	0.000611668	0.000660559	0.00056027	0.000671342	0.000664937	0.000749381	0.00063532	0.000644655	0.000607172	0.000541743	0.000611378	0.000610653	0.000745911	0.952353	0.968298	-0.163886
K03527	0.000912517	0.000783489	0.000746364	0.000792211	0.000814695	0.000846925	0.000783997	0.000826806	0.000842826	0.000842878	0.000877565	0.000794151	0.00082684	0.000801467	0.000794284	0.00076895	0.000879918	0.00077551	0.951681	0.967895	-0.29684
K08194	0	0	0	0	0	4.28e-06	0	0	0	0	0	0	4.67e-06	0	0	0	0	0	0.951671	0.967895	-0.00543532
K08971	4.96e-06	9.92e-06	4.55e-06	4.26e-06	4.55e-06	8.55e-06	1.33e-05	1.09e-05	7.3e-06	9.37e-06	4.93e-06	1.13e-05	4.67e-06	6.07e-06	4.07e-06	6.3e-06	4.81e-06	1.78e-05	0.95152	0.967895	-0.0318411
K01823	6.45e-05	6.28e-05	3.64e-05	2.56e-05	2.28e-05	5.13e-05	6.67e-05	3.81e-05	5.11e-05	5.15e-05	3.94e-05	3.97e-05	5.61e-05	4.25e-05	4.07e-05	3.78e-05	3.85e-05	7.7e-05	0.951514	0.967895	-0.0514969
K00996	4.96e-06	3.31e-06	0	8.52e-06	9.1e-06	8.55e-06	6.67e-06	0	0	4.68e-06	4.93e-06	0	9.34e-06	6.07e-06	4.07e-06	6.3e-06	4.81e-06	0	0.951254	0.967895	0.0215294
K07271	0.000679429	0.000499185	0.000623487	0.000681472	0.000646295	0.000573171	0.000597172	0.000652742	0.000609316	0.000590015	0.000601477	0.00058994	0.000668012	0.000582885	0.0007006	0.000605075	0.000653928	0.000556473	0.95114	0.967895	0.194008
K18785	0.000138861	0.000155375	0.000113775	0.000127776	0.000145644	0.000166819	0.000146791	0.000152306	0.000153241	0.00014048	0.000123253	0.000164503	0.0001308	0.000145721	0.000154784	0.000157572	0.000163482	0.000124318	0.950102	0.967495	-0.152106
K22757	2.48e-05	4.96e-05	4.1e-05	2.98e-05	3.19e-05	3.85e-05	3e-05	3.81e-05	3.65e-05	4.21e-05	2.96e-05	2.27e-05	3.74e-05	5.46e-05	3.26e-05	4.41e-05	2.4e-05	3.55e-05	0.949965	0.967495	-0.0679965
K05792	4.96e-06	3.31e-06	4.55e-06	8.52e-06	1.37e-05	1.71e-05	3.34e-06	5.44e-06	7.3e-06	0	4.93e-06	1.13e-05	4.67e-06	1.21e-05	1.22e-05	1.26e-05	0	1.18e-05	0.949849	0.967495	-0.0254729
K05841	0	0	0	4.26e-06	4.55e-06	4.28e-06	0	5.44e-06	0	0	0	5.67e-06	4.67e-06	0	4.07e-06	0	4.81e-06	0	0.949246	0.967227	-0.0142921
K05796	1.49e-05	6.61e-06	4.55e-06	2.13e-05	9.1e-06	4.28e-06	1.33e-05	5.44e-06	3.65e-06	1.87e-05	9.86e-06	1.13e-05	4.67e-06	6.07e-06	8.15e-06	6.3e-06	4.81e-06	1.18e-05	0.948944	0.967121	0.0296351
K01465	0.000763737	0.000780183	0.000841935	0.000787952	0.000801041	0.000816983	0.00076398	0.000881201	0.000788097	0.000885022	0.00070008	0.000777133	0.00079414	0.000771108	0.000944995	0.000806767	0.000812602	0.000716311	0.948221	0.966586	0.231517
K17816	0	3.31e-06	4.55e-06	4.26e-06	9.1e-06	4.28e-06	3.34e-06	0	3.65e-06	4.68e-06	4.93e-06	5.67e-06	0	6.07e-06	4.07e-06	6.3e-06	0	0	0.947497	0.966048	0.0233137
K08972	6.45e-05	8.93e-05	7.74e-05	7.67e-05	7.28e-05	4.71e-05	6.01e-05	5.44e-05	5.47e-05	7.02e-05	5.92e-05	4.54e-05	7.01e-05	8.5e-05	3.67e-05	9.45e-05	4.81e-05	8.29e-05	0.94672	0.965457	0.0698706
K13950	0	0	0	4.26e-06	4.55e-06	4.28e-06	0	0	0	0	0	0	0	6.07e-06	0	6.3e-06	0	0	0.946088	0.965013	0.0104246
K19141	9.92e-06	3.31e-06	9.1e-06	4.26e-06	4.55e-06	4.28e-06	6.67e-06	0	7.3e-06	0	0	1.13e-05	4.67e-06	1.21e-05	4.07e-06	1.26e-05	0	5.92e-06	0.945488	0.964603	-0.0237449
K06203	4.96e-06	6.61e-06	9.1e-06	4.26e-06	4.55e-06	4.28e-06	3.34e-06	0	0	0	0	0	4.67e-06	6.07e-06	4.07e-06	1.26e-05	4.81e-06	5.92e-06	0.945175	0.964484	-0.0220574
K07583	4.96e-06	1.32e-05	1.37e-05	4.26e-06	4.55e-06	8.55e-06	1.33e-05	1.09e-05	1.46e-05	9.37e-06	9.86e-06	1.13e-05	4.67e-06	1.82e-05	4.07e-06	1.26e-05	4.81e-06	1.18e-05	0.944147	0.963636	0.0412557
K15257	4.96e-06	3.31e-06	9.1e-06	4.26e-06	4.55e-06	0	6.67e-06	0	7.3e-06	4.68e-06	0	5.67e-06	4.67e-06	6.07e-06	4.07e-06	6.3e-06	9.62e-06	0	0.943792	0.963475	-0.0279926
K11618	0	0	0	4.26e-06	4.55e-06	0	0	0	0	0	0	0	0	0	0	0	9.62e-06	0	0.943491	0.963369	-0.00737041
K05916	4.96e-06	6.61e-06	4.55e-06	1.28e-05	4.55e-06	4.28e-06	3.34e-06	0	3.65e-06	0	0	0	9.34e-06	6.07e-06	4.07e-06	1.89e-05	4.81e-06	0	0.943198	0.96327	0.0185678
K02238	0.000962111	0.000922335	0.00081918	0.000924246	0.00099675	0.000928195	0.000914107	0.000794169	0.000872015	0.000889705	0.000897285	0.000941636	0.000948297	0.000928973	0.000892042	0.000895007	0.000855876	0.000899829	0.942847	0.963112	-0.347146
K22585	9.92e-06	1.65e-05	9.1e-06	8.52e-06	9.1e-06	8.55e-06	1.33e-05	1.63e-05	1.09e-05	9.37e-06	9.86e-06	1.7e-05	9.34e-06	1.21e-05	8.15e-06	1.26e-05	4.81e-06	1.78e-05	0.942364	0.96282	0.059039
K09473	0	0	0	0	4.55e-06	0	3.34e-06	0	3.65e-06	0	4.93e-06	0	0	0	0	0	0	5.92e-06	0.941691	0.962333	0.0111929
K03664	0.00120512	0.00121986	0.00119236	0.00112869	0.00119246	0.00120195	0.00116766	0.00105526	0.00123323	0.00120812	0.00117337	0.00122526	0.00116318	0.00119006	0.00111607	0.00119754	0.00112995	0.00117807	0.940105	0.960914	0.515373
K19116	1.49e-05	3.31e-06	4.55e-06	8.52e-06	9.1e-06	2.57e-05	0	5.44e-06	3.65e-06	9.37e-06	0	0	9.34e-06	1.82e-05	1.22e-05	1.89e-05	9.62e-06	0	0.939994	0.960914	-0.0226926
K03720	3.47e-05	2.64e-05	3.19e-05	1.28e-05	3.19e-05	2.14e-05	3.67e-05	3.81e-05	4.01e-05	1.87e-05	4.93e-05	2.84e-05	1.4e-05	4.86e-05	1.22e-05	4.41e-05	1.92e-05	3.55e-05	0.939468	0.960664	0.0505614
K21134	0	0	4.55e-06	0	0	0	0	5.44e-06	0	4.68e-06	0	0	0	6.07e-06	0	0	0	0	0.939056	0.960443	-0.0102845
K11646	4.96e-06	1.65e-05	4.55e-06	4.26e-06	4.55e-06	4.28e-06	1.33e-05	2.18e-05	1.46e-05	9.37e-06	9.86e-06	1.13e-05	4.67e-06	1.21e-05	4.07e-06	1.89e-05	4.81e-06	1.18e-05	0.939001	0.960443	0.0345453
K07505	4.96e-06	9.92e-06	1.82e-05	4.26e-06	9.1e-06	8.55e-06	2e-05	5.44e-06	1.09e-05	1.87e-05	4.93e-06	5.67e-06	0	2.43e-05	1.22e-05	6.3e-06	9.62e-06	1.18e-05	0.938548	0.960325	-0.0323434
K02357	0.00105634	0.00110085	0.00107859	0.00105202	0.00105137	0.000962415	0.00103421	0.000935596	0.00102526	0.00106765	0.00106984	0.000998361	0.00101837	0.00107469	0.000944995	0.00107779	0.000990508	0.00107151	0.937779	0.959738	-0.428382
K07776	3.47e-05	1.98e-05	3.64e-05	2.13e-05	2.73e-05	2.57e-05	4e-05	1.63e-05	3.65e-05	1.87e-05	3.94e-05	1.7e-05	1.4e-05	5.46e-05	2.44e-05	4.41e-05	1.44e-05	3.55e-05	0.937106	0.95925	-0.050921
K15855	4.96e-06	0	0	0	0	4.28e-06	3.34e-06	5.44e-06	3.65e-06	0	4.93e-06	5.67e-06	0	6.07e-06	0	0	0	5.92e-06	0.936935	0.95925	-0.0194168
K07714	9.92e-06	0	4.55e-06	0	9.1e-06	8.55e-06	1.67e-05	1.63e-05	1.46e-05	4.68e-06	1.48e-05	5.67e-06	9.34e-06	6.07e-06	8.15e-06	1.26e-05	4.81e-06	1.18e-05	0.936285	0.958811	0.0360802
K00801	1.49e-05	6.61e-06	2.28e-05	8.52e-06	4.55e-06	8.55e-06	6.67e-06	1.63e-05	1.09e-05	9.37e-06	4.93e-06	1.13e-05	9.34e-06	1.82e-05	8.15e-06	1.89e-05	9.62e-06	1.18e-05	0.936225	0.958811	-0.0459307
K03491	3.97e-05	2.64e-05	1.82e-05	2.13e-05	2.73e-05	2.57e-05	2e-05	1.63e-05	2.55e-05	1.87e-05	4.93e-06	2.27e-05	4.2e-05	1.21e-05	4.07e-05	1.89e-05	5.29e-05	1.18e-05	0.936218	0.958811	-0.0424422
K21394	1.98e-05	2.98e-05	3.64e-05	3.41e-05	3.19e-05	4.71e-05	4.67e-05	6.53e-05	4.74e-05	4.21e-05	3.45e-05	2.84e-05	3.74e-05	3.64e-05	4.07e-05	3.78e-05	6.73e-05	2.96e-05	0.93586	0.958811	0.0691994
K09776	0	6.61e-06	0	0	9.1e-06	4.28e-06	0	0	0	0	0	0	4.67e-06	6.07e-06	4.07e-06	6.3e-06	0	0	0.935661	0.958811	-0.0154164
K07034	9.92e-06	3.31e-05	1.37e-05	1.7e-05	1.37e-05	2.57e-05	1.67e-05	3.81e-05	1.82e-05	1.87e-05	2.96e-05	1.7e-05	2.34e-05	2.43e-05	1.22e-05	1.89e-05	9.62e-06	3.55e-05	0.935531	0.958811	-0.0510721
K07254	9.92e-06	1.32e-05	9.1e-06	4.26e-06	4.55e-06	8.55e-06	1.33e-05	1.09e-05	1.82e-05	4.68e-06	9.86e-06	1.7e-05	4.67e-06	1.21e-05	4.07e-06	1.89e-05	4.81e-06	1.78e-05	0.934478	0.958163	-0.0424032
K07055	4.96e-06	9.92e-06	9.1e-06	4.26e-06	4.55e-06	8.55e-06	1e-05	1.09e-05	7.3e-06	4.68e-06	4.93e-06	1.13e-05	4.67e-06	6.07e-06	4.07e-06	1.26e-05	4.81e-06	1.78e-05	0.933827	0.957696	-0.0449149
K06998	0	3.31e-06	0	0	0	4.28e-06	3.34e-06	5.44e-06	0	0	4.93e-06	0	0	6.07e-06	0	6.3e-06	0	0	0.933757	0.957696	-0.0161252
K01582	3.47e-05	2.98e-05	2.73e-05	1.7e-05	1.82e-05	8.55e-06	6.67e-06	2.72e-05	1.46e-05	9.37e-06	1.97e-05	2.84e-05	1.87e-05	2.43e-05	2.44e-05	2.52e-05	1.92e-05	1.18e-05	0.933715	0.957696	0.0551915
K00613	0	6.61e-06	0	0	4.55e-06	4.28e-06	3.34e-06	5.44e-06	3.65e-06	0	4.93e-06	5.67e-06	0	6.07e-06	0	6.3e-06	0	5.92e-06	0.932731	0.957174	-0.0255601
K02483	3.47e-05	3.97e-05	4.1e-05	4.26e-05	4.55e-05	1.71e-05	6.01e-05	6.53e-05	5.84e-05	5.62e-05	2.96e-05	3.4e-05	4.67e-05	5.46e-05	4.89e-05	5.67e-05	5.29e-05	2.96e-05	0.932697	0.957174	-0.077935
K07492	0	0	0	0	0	0	0	5.44e-06	0	0	0	0	0	0	0	0	4.81e-06	0	0.93194	0.956763	0.00765041
K01281	0	6.61e-06	1.37e-05	1.28e-05	4.55e-06	0	3.34e-06	5.44e-06	7.3e-06	4.68e-06	0	5.67e-06	4.67e-06	6.07e-06	8.15e-06	0	4.81e-06	1.78e-05	0.930922	0.955919	0.0270635
K22617	0	0	0	0	0	0	3.34e-06	0	3.65e-06	0	0	0	0	0	0	6.3e-06	0	0	0.930767	0.955919	0.00937253
K02974	4.96e-06	9.92e-06	9.1e-06	4.26e-06	9.1e-06	4.28e-06	1.67e-05	1.09e-05	1.46e-05	9.37e-06	9.86e-06	1.13e-05	9.34e-06	1.21e-05	4.07e-06	1.26e-05	4.81e-06	1.18e-05	0.930545	0.955919	-0.0579026
K05715	0	3.31e-06	0	0	0	0	0	0	7.3e-06	0	0	5.67e-06	0	0	0	0	0	5.92e-06	0.928937	0.954481	-0.0116149
K20116	0.000128943	9.59e-05	0.000104673	9.37e-05	0.000122887	0.000106935	6.67e-05	0.000130548	7.66e-05	7.96e-05	9.37e-05	9.64e-05	9.34e-05	9.11e-05	0.000171077	8.19e-05	0.000149057	5.92e-05	0.928459	0.95419	0.0836012
K02774	5.95e-05	5.29e-05	5.92e-05	5.11e-05	5.01e-05	4.28e-05	5e-05	5.44e-05	5.11e-05	2.34e-05	4.44e-05	6.24e-05	7.01e-05	5.46e-05	7.33e-05	4.41e-05	5.29e-05	4.14e-05	0.928311	0.95419	0.108737
K06020	4.96e-06	3.31e-06	4.55e-06	4.26e-06	4.55e-06	4.28e-06	3.34e-06	5.44e-06	3.65e-06	4.68e-06	0	0	9.34e-06	6.07e-06	8.15e-06	6.3e-06	4.81e-06	0	0.927916	0.954032	-0.0405841
K13059	5.46e-05	3.64e-05	5.01e-05	6.39e-05	5.01e-05	3.85e-05	4e-05	5.44e-05	4.74e-05	8.43e-05	5.92e-05	5.11e-05	4.67e-05	3.04e-05	4.48e-05	2.52e-05	5.77e-05	4.14e-05	0.927781	0.954032	-0.0859309
K03976	0.000848046	0.000770266	0.000755466	0.000809248	0.000705463	0.000761377	0.000794006	0.000832245	0.000769854	0.000805417	0.000823333	0.00077146	0.000766112	0.000807539	0.00082687	0.000750041	0.000740477	0.000769591	0.927759	0.954032	-0.502754
K03631	0.000853005	0.000763654	0.000778221	0.000804988	0.000819247	0.000761377	0.000787333	0.000788729	0.000784448	0.000838195	0.000764172	0.000782806	0.000798812	0.000752893	0.00083909	0.000743738	0.000827026	0.00078143	0.927366	0.954032	0.595327
K18347	4.96e-06	0	0	0	0	0	0	0	0	0	0	5.67e-06	0	0	0	0	0	0	0.926082	0.952948	-0.00830732
K09942	2.48e-05	1.65e-05	2.73e-05	1.28e-05	1.82e-05	2.14e-05	3e-05	1.63e-05	2.92e-05	1.4e-05	1.97e-05	1.7e-05	1.87e-05	3.64e-05	1.63e-05	3.78e-05	9.62e-06	2.37e-05	0.925577	0.952629	0.066833
K19419	0.000168617	0.00013554	0.000150183	0.000144813	0.000104682	0.00011549	0.000136782	0.000135988	0.000142295	0.000117066	0.000197206	0.00013614	0.000116785	0.000115363	0.000146637	9.45e-05	0.000134632	0.000165758	0.925281	0.952524	0.135294
K02356	0.00121008	0.00121656	0.00109679	0.00110739	0.00119246	0.00112496	0.00106757	0.00103351	0.00112012	0.00120812	0.00119309	0.0010721	0.00117252	0.00113541	0.00103461	0.00102106	0.00112995	0.00123135	0.924338	0.951753	-0.411276
K01845	0.000188455	0.000171905	0.000209346	0.000204441	0.000150195	0.000179651	0.000183489	0.000174064	0.000215267	0.000168576	0.000187345	0.00015883	0.000158828	0.000230725	0.000171077	0.000239509	0.000149057	0.000224957	0.922027	0.949573	-0.171918
K16698	0.000119024	8.93e-05	9.56e-05	0.000127776	0.000122887	0.000128322	0.000106757	0.000135988	0.000105809	9.83e-05	0.000123253	0.000119123	0.000149485	0.000103219	0.000146637	8.82e-05	0.000110591	0.000100639	0.921696	0.949433	-0.161558
K01729	9.92e-06	0	9.1e-06	0	4.55e-06	0	0	5.44e-06	0	0	4.93e-06	0	1.4e-05	0	1.22e-05	0	0	0	0.921584	0.949433	-0.0177202
K06162	4.96e-06	6.61e-06	9.1e-06	0	4.55e-06	4.28e-06	0	1.09e-05	3.65e-06	0	0	1.13e-05	4.67e-06	6.07e-06	8.15e-06	6.3e-06	0	5.92e-06	0.920797	0.948905	0.0335978
K20529	4.96e-06	6.61e-06	1.37e-05	4.26e-06	9.1e-06	4.28e-06	0	1.63e-05	0	0	4.93e-06	1.13e-05	0	1.21e-05	4.07e-06	1.26e-05	0	1.18e-05	0.92079	0.948905	0.0306823
K02796	7.93e-05	5.29e-05	3.64e-05	4.26e-05	1.37e-05	2.57e-05	3e-05	7.62e-05	4.01e-05	4.21e-05	2.47e-05	3.4e-05	5.61e-05	3.64e-05	4.48e-05	4.41e-05	7.69e-05	2.96e-05	0.920749	0.948905	0.0611302
K16958	2.98e-05	1.98e-05	2.28e-05	2.13e-05	3.64e-05	3.85e-05	3.34e-05	3.26e-05	2.92e-05	1.87e-05	2.47e-05	2.84e-05	4.2e-05	3.04e-05	3.67e-05	3.78e-05	2.4e-05	1.78e-05	0.920539	0.948905	0.101915
K13922	8.43e-05	0.000119011	8.19e-05	7.67e-05	0.00010013	0.000111212	7.34e-05	0.000163185	7.66e-05	0.000112384	8.38e-05	6.24e-05	0.000121457	5.46e-05	0.00016293	5.04e-05	0.00016829	5.33e-05	0.920038	0.948905	0.0675882
K00882	0.000396747	0.000360339	0.000368631	0.000413142	0.000450586	0.000449127	0.000356969	0.00045148	0.000404994	0.00044017	0.000384551	0.0004538	0.000425099	0.000327873	0.000496937	0.000346658	0.000480829	0.000319676	0.919698	0.948772	-0.203608
K01869	0.000853005	0.000826465	0.000782772	0.000792211	0.000851106	0.000769932	0.00076398	0.00078329	0.000751611	0.000805417	0.000778962	0.000743098	0.000864211	0.000819682	0.000786138	0.000781555	0.000730861	0.00084655	0.919059	0.948312	0.532986
K11939	0	0	0	0	0	0	0	5.44e-06	0	0	0	0	0	0	0	6.3e-06	0	0	0.918993	0.948312	-0.00910178
K03366	9.92e-06	3.31e-06	4.55e-06	4.26e-06	1.37e-05	1.28e-05	3.34e-06	1.63e-05	3.65e-06	1.4e-05	0	5.67e-06	4.67e-06	1.21e-05	4.07e-06	6.3e-06	9.62e-06	1.78e-05	0.917857	0.947472	-0.0417265
K19114	9.92e-06	3.31e-06	4.55e-06	8.52e-06	1.37e-05	1.71e-05	0	0	0	4.68e-06	0	0	9.34e-06	6.07e-06	1.22e-05	1.26e-05	9.62e-06	0	0.917347	0.947145	0.0299148
K02236	2.98e-05	6.28e-05	7.74e-05	4.26e-05	4.1e-05	5.56e-05	4.34e-05	4.9e-05	3.65e-05	2.81e-05	2.96e-05	6.81e-05	5.14e-05	7.89e-05	2.04e-05	7.56e-05	2.4e-05	7.1e-05	0.916906	0.94689	-0.069011
K07446	4.96e-06	1.32e-05	9.1e-06	4.26e-06	4.55e-06	8.55e-06	1.33e-05	1.09e-05	1.09e-05	4.68e-06	9.86e-06	1.7e-05	4.67e-06	1.21e-05	4.07e-06	1.26e-05	4.81e-06	1.18e-05	0.916857	0.94689	-0.0605979
K15034	1.49e-05	9.92e-06	2.28e-05	4.26e-06	9.1e-06	8.55e-06	2e-05	1.63e-05	1.46e-05	9.37e-06	1.48e-05	1.7e-05	4.67e-06	1.82e-05	4.07e-06	2.52e-05	0	2.37e-05	0.916778	0.94689	0.0488639
K11785	9.92e-06	1.32e-05	2.28e-05	8.52e-06	9.1e-06	4.28e-06	3.34e-06	1.09e-05	7.3e-06	9.37e-06	4.93e-06	5.67e-06	1.4e-05	1.21e-05	1.22e-05	1.89e-05	9.62e-06	0	0.915933	0.946484	0.0492282
K03635	9.92e-06	9.92e-06	1.37e-05	8.52e-06	1.37e-05	4.28e-06	2e-05	1.09e-05	1.46e-05	1.4e-05	4.93e-06	1.13e-05	1.4e-05	1.82e-05	1.22e-05	1.26e-05	1.44e-05	5.92e-06	0.913873	0.944554	-0.0799343
K19426	5.46e-05	1.98e-05	3.64e-05	2.13e-05	2.73e-05	2.14e-05	1.33e-05	4.35e-05	2.55e-05	3.75e-05	2.47e-05	1.7e-05	3.27e-05	1.21e-05	4.07e-05	2.52e-05	4.33e-05	3.55e-05	0.91387	0.944554	-0.0716085
K18285	9.92e-06	2.64e-05	2.28e-05	1.28e-05	2.28e-05	1.28e-05	1.33e-05	2.72e-05	1.46e-05	1.4e-05	4.93e-06	5.67e-06	2.34e-05	4.25e-05	2.04e-05	3.78e-05	1.92e-05	0	0.913649	0.944554	-0.0474458
K01708	1.49e-05	1.98e-05	9.1e-06	4.26e-06	2.28e-05	1.28e-05	2e-05	5.44e-06	1.46e-05	4.68e-06	1.48e-05	5.67e-06	2.34e-05	1.21e-05	2.04e-05	1.26e-05	9.62e-06	2.37e-05	0.911545	0.942745	-0.0609781
K02749	4.96e-06	1.32e-05	0	4.26e-06	4.55e-06	4.28e-06	3.34e-06	1.09e-05	0	4.68e-06	0	0	9.34e-06	6.07e-06	1.22e-05	6.3e-06	4.81e-06	0	0.911485	0.942745	0.0338779
K02750	4.96e-06	1.32e-05	0	4.26e-06	4.55e-06	4.28e-06	3.34e-06	1.09e-05	0	4.68e-06	0	0	9.34e-06	6.07e-06	1.22e-05	6.3e-06	4.81e-06	0	0.911485	0.942745	0.0338779
K16137	4.96e-06	0	4.55e-06	0	0	0	0	0	3.65e-06	0	0	0	0	6.07e-06	0	0	0	5.92e-06	0.91144	0.942745	0.0171397
K04835	4.46e-05	6.94e-05	3.19e-05	3.83e-05	2.28e-05	2.57e-05	6.01e-05	4.35e-05	8.03e-05	5.62e-05	8.38e-05	4.54e-05	4.2e-05	1.82e-05	4.89e-05	2.52e-05	5.29e-05	5.33e-05	0.911188	0.942745	-0.0726473
K00791	0.00122992	0.00115044	0.00125608	0.00121813	0.00120611	0.00115062	0.00120435	0.00113142	0.00113836	0.0012409	0.00124733	0.00117421	0.00118654	0.0012447	0.00110793	0.00115342	0.0011011	0.00125503	0.911092	0.942745	-0.668518
K02314	0.0011704	0.00109424	0.00111499	0.00113295	0.00114239	0.00109074	0.00108425	0.00101175	0.00107634	0.00117535	0.00103533	0.00111181	0.0011118	0.00108077	0.00100202	0.00113452	0.00110591	0.00113663	0.910925	0.942745	0.667792
K01683	0	0	0	0	0	0	6.67e-06	0	0	0	0	5.67e-06	0	0	0	0	0	0	0.910477	0.942745	0.0100554
K18337	0	3.31e-06	4.55e-06	0	0	4.28e-06	0	0	3.65e-06	4.68e-06	0	0	0	0	4.07e-06	0	0	5.92e-06	0.910344	0.942745	0.0222274
K17759	0.000535608	0.000578526	0.000609834	0.000566473	0.000605332	0.000598836	0.000580491	0.000630983	0.000539992	0.00059938	0.000552176	0.000578595	0.000565241	0.000576813	0.00068838	0.000560955	0.000601037	0.000503194	0.910334	0.942745	0.421617
K02911	0.000634795	0.000681007	0.000618936	0.00063888	0.000618987	0.000637332	0.000610517	0.000549391	0.000602018	0.000660255	0.000655709	0.00056725	0.000668012	0.000619315	0.000582475	0.000630287	0.000490446	0.000745911	0.909885	0.942745	-0.333041
K03820	0.000143821	0.000198352	0.000145632	0.000149072	0.000154747	8.55e-05	0.000163472	0.000135988	0.000171484	0.000173258	0.000167625	0.000164503	0.000121457	0.000151793	0.000105905	0.000163874	0.000120207	0.000165758	0.909698	0.942745	0.16249
K03841	9.92e-06	9.92e-06	9.1e-06	8.52e-06	9.1e-06	4.28e-06	6.67e-06	1.09e-05	1.46e-05	1.4e-05	4.93e-06	5.67e-06	1.4e-05	1.21e-05	8.15e-06	1.26e-05	9.62e-06	0	0.908708	0.9422	0.0716798
K14267	4.96e-06	3.31e-06	4.55e-06	4.26e-06	4.55e-06	4.28e-06	3.34e-06	5.44e-06	3.65e-06	4.68e-06	0	0	4.67e-06	6.07e-06	4.07e-06	1.26e-05	4.81e-06	0	0.90737	0.941012	0.045595
K03972	1.49e-05	1.98e-05	1.37e-05	1.28e-05	1.37e-05	1.28e-05	3.34e-06	1.09e-05	3.65e-06	9.37e-06	9.86e-06	1.13e-05	1.4e-05	1.21e-05	8.15e-06	1.26e-05	1.44e-05	1.18e-05	0.907265	0.941012	0.0910171
K02752	0	3.31e-06	0	0	0	0	6.67e-06	0	0	0	0	0	0	0	4.07e-06	0	4.81e-06	0	0.906367	0.94037	0.0152889
K02753	0	3.31e-06	0	0	0	0	6.67e-06	0	0	0	0	0	0	0	4.07e-06	0	4.81e-06	0	0.906367	0.94037	0.0152889
K20510	0	3.31e-06	0	4.26e-06	4.55e-06	4.28e-06	3.34e-06	0	3.65e-06	0	4.93e-06	0	0	6.07e-06	0	6.3e-06	4.81e-06	0	0.906133	0.94037	0.0318571
K06311	4.96e-06	1.32e-05	1.37e-05	8.52e-06	9.1e-06	0	1.33e-05	2.18e-05	1.09e-05	9.37e-06	9.86e-06	2.27e-05	9.34e-06	0	8.15e-06	1.26e-05	1.44e-05	5.92e-06	0.905903	0.94037	0.0538702
K09707	0.00014878	9.59e-05	0.000127428	0.00015759	0.00013199	0.000106935	0.000163472	0.000130548	0.00015689	0.000131114	0.000118323	0.000141813	0.000112114	0.000170008	0.00015071	0.00017648	0.000125016	0.000106559	0.903582	0.938277	-0.183969
K10227	4.96e-06	0	0	0	0	0	0	0	0	0	0	0	0	0	0	0	0	5.92e-06	0.902625	0.937482	-0.0109336
K01868	0.000897639	0.000912418	0.000832833	0.000877395	0.000951237	0.000829815	0.000854056	0.000832245	0.000879312	0.000889705	0.000887425	0.000856548	0.000887568	0.000928973	0.000814651	0.000806767	0.00081741	0.000953108	0.9024	0.937447	0.614057
K02338	0.00126463	0.00122978	0.00118326	0.0011798	0.00117881	0.00112923	0.00114764	0.0010879	0.00114201	0.00121281	0.00119802	0.00115719	0.00122858	0.00114755	0.00107127	0.00121645	0.00107706	0.00126686	0.900418	0.935586	-0.650934
K10773	0.00126959	0.00119011	0.00120146	0.00114572	0.00122432	0.00115917	0.00117433	0.00107158	0.00120404	0.00120344	0.00121774	0.00122526	0.00118187	0.0011597	0.00114051	0.00118494	0.00111072	0.00124318	0.898971	0.934281	-0.818782
K03040	0.00113073	0.00113391	0.00107404	0.00105202	0.00111509	0.00100947	0.00105423	0.00101719	0.00108728	0.00114725	0.00113886	0.000981343	0.00111647	0.00112327	0.000993874	0.00100846	0.0010434	0.00108927	0.896329	0.931733	0.665585
K04566	8.43e-05	8.93e-05	9.56e-05	7.67e-05	8.65e-05	5.13e-05	7.01e-05	8.7e-05	9.12e-05	0.000126432	8.87e-05	8.51e-05	7.01e-05	6.68e-05	4.89e-05	6.3e-05	8.17e-05	0.000112479	0.895438	0.931004	-0.14648
K20626	4.96e-06	3.31e-06	4.55e-06	0	0	4.28e-06	3.34e-06	5.44e-06	3.65e-06	4.68e-06	0	0	9.34e-06	0	4.07e-06	0	9.62e-06	0	0.8953	0.931004	0.0351031
K01846	3.97e-05	7.27e-05	2.73e-05	6.39e-05	4.1e-05	2.57e-05	7.67e-05	5.44e-05	6.57e-05	7.02e-05	7.89e-05	4.54e-05	5.61e-05	3.04e-05	4.89e-05	3.78e-05	4.81e-05	4.14e-05	0.89511	0.931004	0.104587
K14088	9.92e-06	1.98e-05	3.19e-05	1.28e-05	9.1e-06	2.14e-05	3e-05	2.18e-05	2.55e-05	1.4e-05	1.48e-05	1.13e-05	2.8e-05	2.43e-05	2.04e-05	1.26e-05	2.88e-05	2.37e-05	0.894604	0.93073	0.0942902
K21019	0	3.31e-06	4.55e-06	0	0	0	3.34e-06	5.44e-06	3.65e-06	0	0	1.13e-05	0	6.07e-06	0	0	4.81e-06	0	0.893924	0.930221	-0.0257475
K19422	0.000138861	0.000171905	0.000150183	0.00015759	0.000145644	0.000124045	0.000123438	0.000130548	0.000131349	0.00014048	0.000152834	0.00015883	0.000140142	0.000133578	9.78e-05	0.000126057	0.000163482	0.000171678	0.893542	0.93002	-0.260896
K03101	0.00122496	0.00124631	0.00120146	0.00118406	0.00118336	0.00111212	0.00119101	0.00120213	0.00120039	0.00121749	0.00122761	0.00116854	0.00122391	0.00114148	0.00120568	0.00116603	0.00120688	0.00120766	0.892748	0.929392	-1.29293
K00651	0.000585201	0.000571914	0.000559773	0.000651657	0.000582576	0.000611668	0.000540458	0.000620104	0.00057283	0.000590015	0.000557106	0.00054456	0.000569912	0.000552526	0.000692453	0.000548349	0.000658736	0.000556473	0.892643	0.929392	0.4761
K20023	4.96e-06	0	0	0	0	0	0	0	0	0	0	0	0	0	4.07e-06	0	0	0	0.891408	0.928392	0.0121869
K06416	0.000218211	0.000274387	0.000241203	0.00026407	0.000291288	0.000333637	0.000206842	0.000174064	0.000197024	0.000248181	0.000266228	0.00024959	0.000233571	0.000261084	0.00016293	0.000296235	0.000163482	0.000290076	0.891049	0.928216	0.180123
K09713	0	3.31e-06	0	0	0	0	3.34e-06	0	3.65e-06	0	0	5.67e-06	0	0	0	0	0	5.92e-06	0.890728	0.928079	-0.0206395
K20117	0.000128943	0.000105788	0.000109224	9.8e-05	0.000127438	0.00011549	7.67e-05	0.000135988	8.76e-05	9.37e-05	9.37e-05	0.00011345	0.000102771	9.11e-05	0.000183296	8.19e-05	0.000173099	7.1e-05	0.889129	0.92661	-0.132194
K11031	4.96e-06	0	9.1e-06	4.26e-06	4.55e-06	4.28e-06	6.67e-06	5.44e-06	3.65e-06	4.68e-06	4.93e-06	5.67e-06	0	0	8.15e-06	1.26e-05	4.81e-06	0	0.888812	0.926477	0.0509618
K11175	0.000738941	0.00080663	0.000814629	0.000783692	0.000732771	0.000834093	0.000747299	0.000930157	0.000762557	0.000847561	0.000778962	0.00072608	0.000850197	0.000716463	0.000904262	0.000743738	0.000865493	0.000674872	0.888475	0.926323	0.418844
K16323	0	3.31e-06	0	0	9.1e-06	0	0	0	0	0	0	0	0	0	0	0	4.81e-06	5.92e-06	0.887784	0.925799	0.0176736
K05787	4.96e-06	9.92e-06	4.55e-06	1.28e-05	1.82e-05	4.28e-06	1e-05	3.26e-05	1.46e-05	1.4e-05	9.86e-06	1.7e-05	9.34e-06	3.04e-05	8.15e-06	1.26e-05	9.62e-06	5.92e-06	0.887645	0.925799	-0.0590985
K12410	0.000689347	0.000753736	0.000855588	0.000732582	0.000732771	0.000688661	0.00076398	0.000848564	0.0007808	0.000697716	0.000764172	0.00077146	0.000752097	0.000795395	0.000761698	0.00076895	0.000711627	0.00079327	0.887565	0.925799	0.593703
K09921	4.96e-06	3.31e-06	4.55e-06	4.26e-06	4.55e-06	4.28e-06	3.34e-06	5.44e-06	3.65e-06	4.68e-06	0	0	4.67e-06	1.21e-05	4.07e-06	6.3e-06	4.81e-06	0	0.886964	0.925536	0.0570856
K02233	0.000282682	0.000284304	0.000354978	0.000379069	0.000291288	0.000333637	0.000320271	0.000359008	0.000335671	0.000341834	0.000325389	0.000300643	0.000345685	0.000285371	0.000378813	0.000327749	0.000341389	0.000313756	0.884172	0.92282	-0.409254
K00547	3.97e-05	6.94e-05	7.74e-05	9.37e-05	8.19e-05	6.84e-05	9.67e-05	8.16e-05	7.3e-05	7.02e-05	7.4e-05	6.81e-05	0.000102771	6.68e-05	0.000134417	6.93e-05	6.25e-05	4.74e-05	0.884028	0.92282	-0.137952
K02584	2.48e-05	4.3e-05	5.46e-05	2.98e-05	3.19e-05	2.14e-05	4.67e-05	1.63e-05	4.38e-05	2.81e-05	3.45e-05	3.4e-05	1.4e-05	6.68e-05	2.04e-05	5.04e-05	1.92e-05	3.55e-05	0.883158	0.922154	0.0910898
K06714	3.47e-05	2.31e-05	0.000118326	8.94e-05	4.55e-06	3.42e-05	4e-05	2.18e-05	2.19e-05	2.81e-05	3.94e-05	3.4e-05	2.8e-05	5.46e-05	3.26e-05	5.04e-05	2.88e-05	0.000112479	0.883069	0.922154	-0.0544071
K03214	1.49e-05	9.92e-06	1.82e-05	1.28e-05	1.37e-05	8.55e-06	1.67e-05	1.63e-05	2.55e-05	9.37e-06	2.47e-05	1.7e-05	4.67e-06	2.43e-05	8.15e-06	2.52e-05	9.62e-06	1.78e-05	0.882269	0.921619	-0.0924523
K00375	0.000362031	0.00038348	0.000395937	0.000459993	0.00043238	0.000423462	0.000447045	0.000462359	0.00044148	0.000486996	0.000389481	0.00038573	0.000453127	0.000321801	0.000492864	0.000365566	0.000500063	0.000378875	0.881143	0.920639	0.324479
K16963	9.92e-06	1.65e-05	1.37e-05	2.98e-05	1.37e-05	1.71e-05	1.33e-05	1.09e-05	1.46e-05	1.87e-05	9.86e-06	1.13e-05	9.34e-06	2.43e-05	1.22e-05	1.89e-05	9.62e-06	2.96e-05	0.880244	0.919897	-0.0963733
K01468	0.000143821	0.00013554	0.000145632	0.00010648	0.000118336	0.000102658	0.000106757	0.000146867	0.000109458	0.000121749	0.000157764	7.37e-05	0.000154157	0.000127506	0.000130344	9.45e-05	0.000110591	0.000130238	0.880144	0.919897	0.216443
K00125	0	3.31e-06	0	0	0	0	6.67e-06	0	0	0	0	5.67e-06	0	0	0	0	0	5.92e-06	0.879224	0.919223	-0.0199326
K00440	0	3.31e-06	0	0	0	0	6.67e-06	0	0	0	0	5.67e-06	0	0	0	0	0	5.92e-06	0.879224	0.919223	-0.0199326
K14103	0	3.31e-06	0	0	0	0	6.67e-06	0	0	0	0	5.67e-06	0	0	0	0	0	5.92e-06	0.879224	0.919223	-0.0199326
K09143	4.96e-06	6.61e-06	9.1e-06	4.26e-06	4.55e-06	8.55e-06	1e-05	1.09e-05	7.3e-06	4.68e-06	4.93e-06	5.67e-06	9.34e-06	6.07e-06	8.15e-06	1.26e-05	4.81e-06	1.18e-05	0.879094	0.919223	-0.110006
K03715	9.92e-06	0	4.55e-06	0	4.55e-06	4.28e-06	6.67e-06	0	3.65e-06	4.68e-06	4.93e-06	0	4.67e-06	6.07e-06	4.07e-06	6.3e-06	4.81e-06	0	0.878476	0.919223	-0.0545375
K01910	8.43e-05	0.000122317	0.000109224	0.000119258	8.19e-05	7.7e-05	0.000126774	0.000103351	0.000131349	0.000112384	0.000128184	0.000119123	9.34e-05	0.000103219	0.000101831	8.19e-05	8.17e-05	0.000147998	0.87623	0.917072	-0.210929
K20533	1.49e-05	1.32e-05	2.28e-05	4.26e-06	1.37e-05	1.71e-05	1.33e-05	2.72e-05	7.3e-06	9.37e-06	2.47e-05	1.7e-05	4.67e-06	1.82e-05	8.15e-06	2.52e-05	9.62e-06	1.18e-05	0.87072	0.9115	0.0886888
K01160	4.96e-06	3.31e-06	4.55e-06	4.26e-06	4.55e-06	4.28e-06	6.67e-06	5.44e-06	3.65e-06	0	4.93e-06	0	4.67e-06	1.21e-05	0	1.26e-05	4.81e-06	0	0.870528	0.911494	0.0540058
K05566	8.43e-05	9.92e-05	0.000104673	0.000119258	0.000104682	0.000124045	0.000110093	0.000119669	0.000116755	9.37e-05	0.000123253	0.000130468	0.0001308	9.11e-05	0.000118124	0.000113452	9.14e-05	0.000100639	0.870505	0.911494	-0.329643
K16959	2.98e-05	1.65e-05	1.37e-05	3.83e-05	4.1e-05	3.85e-05	4e-05	3.26e-05	2.92e-05	2.81e-05	1.97e-05	1.7e-05	3.74e-05	4.25e-05	4.89e-05	4.41e-05	3.85e-05	1.18e-05	0.868638	0.909904	-0.119078
K08081	4.96e-06	9.92e-06	0	0	9.1e-06	1.28e-05	6.67e-06	0	0	4.68e-06	9.86e-06	0	4.67e-06	6.07e-06	4.07e-06	6.3e-06	4.81e-06	0	0.868247	0.909689	0.0497527
K18346	5.46e-05	7.27e-05	0.000109224	9.37e-05	5.92e-05	5.99e-05	7.67e-05	8.7e-05	7.66e-05	8.9e-05	7.4e-05	8.51e-05	6.54e-05	9.71e-05	4.89e-05	6.93e-05	7.21e-05	7.7e-05	0.865925	0.90745	0.214209
K01029	0	3.31e-06	4.55e-06	0	0	4.28e-06	0	0	3.65e-06	0	0	5.67e-06	0	6.07e-06	0	0	0	5.92e-06	0.865541	0.907242	-0.0330399
K00855	0	3.31e-06	0	0	0	4.28e-06	3.34e-06	0	0	4.68e-06	0	0	0	0	0	0	4.81e-06	0	0.86547	0.907242	0.0262201
K12983	0	3.31e-06	9.1e-06	4.26e-06	0	1.28e-05	1e-05	0	1.09e-05	0	4.93e-06	5.67e-06	1.4e-05	0	1.22e-05	0	9.62e-06	0	0.865349	0.907242	0.0453904
K07462	0.000897639	0.000842995	0.000855588	0.000822025	0.000960339	0.000872589	0.000890754	0.000794169	0.000839177	0.000950579	0.000917006	0.000816841	0.000868883	0.000795395	0.000847237	0.000819372	0.000841451	0.000882069	0.864379	0.906607	0.800099
K10796	9.92e-06	1.32e-05	0	0	9.1e-06	0	0	0	0	0	0	0	9.34e-06	6.07e-06	8.15e-06	6.3e-06	0	5.92e-06	0.862394	0.904719	-0.0369671
K06164	0	9.92e-06	4.55e-06	4.26e-06	0	0	0	1.09e-05	3.65e-06	0	0	1.13e-05	4.67e-06	6.07e-06	8.15e-06	6.3e-06	0	0	0.861373	0.903842	-0.0426971
K09805	9.92e-06	1.32e-05	1.82e-05	2.13e-05	4.55e-06	8.55e-06	1.33e-05	1.63e-05	1.46e-05	9.37e-06	0	1.13e-05	2.34e-05	2.43e-05	1.63e-05	2.52e-05	9.62e-06	5.92e-06	0.860796	0.903429	-0.088523
K05822	3.97e-05	2.31e-05	5.01e-05	3.83e-05	5.46e-05	2.57e-05	4.34e-05	3.81e-05	4.38e-05	5.15e-05	3.45e-05	1.13e-05	4.2e-05	3.64e-05	5.3e-05	4.41e-05	5.77e-05	3.55e-05	0.860394	0.903201	-0.156544
K13727	0	3.31e-06	0	0	4.55e-06	0	0	0	0	0	9.86e-06	0	0	0	0	0	0	0	0.860336	0.903201	-0.0176687
K07566	0.00102162	0.00100498	0.000996669	0.00103073	0.000983096	0.00104796	0.000954141	0.000951915	0.000966878	0.00104892	0.000986028	0.000981343	0.000976325	0.000965403	0.000977581	0.00100846	0.00107706	0.000964948	0.859894	0.903064	-1.28311
K22024	3.47e-05	4.63e-05	7.74e-05	3.41e-05	4.55e-05	5.13e-05	5.67e-05	5.98e-05	6.93e-05	6.56e-05	6.41e-05	7.94e-05	2.8e-05	6.07e-05	4.48e-05	3.15e-05	4.81e-05	6.51e-05	0.859151	0.902477	-0.16002
K05844	6.94e-05	9.26e-05	0.000100122	8.94e-05	5.92e-05	8.55e-05	0.000103421	0.00010879	0.000102161	9.83e-05	9.37e-05	0.000119123	7.47e-05	0.000103219	6.92e-05	8.82e-05	8.17e-05	9.47e-05	0.857979	0.901439	-0.275094
K11754	0.000813331	0.000780183	0.000805527	0.000787952	0.000787387	0.000829815	0.000810686	0.000794169	0.000751611	0.00082883	0.0007198	0.000828186	0.000854869	0.000722535	0.000961288	0.000718527	0.00084626	0.000728151	0.857698	0.901338	-0.622753
K03974	0	3.31e-06	0	0	0	0	6.67e-06	5.44e-06	3.65e-06	4.68e-06	4.93e-06	5.67e-06	0	0	0	0	0	5.92e-06	0.857678	0.901338	-0.0391654
K05823	9.92e-06	3.31e-06	0	8.52e-06	4.55e-06	8.55e-06	0	0	0	0	4.93e-06	0	0	6.07e-06	4.07e-06	6.3e-06	4.81e-06	5.92e-06	0.85751	0.901338	0.0505538
K17466	4.96e-06	9.92e-06	0	1.28e-05	1.37e-05	4.28e-06	0	5.44e-06	7.3e-06	1.4e-05	4.93e-06	5.67e-06	4.67e-06	6.07e-06	4.07e-06	0	9.62e-06	5.92e-06	0.857237	0.901338	0.0684884
K08990	0	0	4.55e-06	0	0	0	0	0	0	0	0	0	0	0	0	0	0	5.92e-06	0.856722	0.901086	-0.0160472
K11737	0	0	0	0	4.55e-06	0	0	0	0	0	0	0	0	0	0	0	0	5.92e-06	0.856722	0.901086	-0.0160472
K13529	0	0	4.55e-06	0	0	0	0	0	0	0	0	0	0	0	0	0	0	5.92e-06	0.856722	0.901086	-0.0160472
K16097	0	0	0	0	4.55e-06	0	0	0	0	0	0	0	0	0	0	0	0	5.92e-06	0.856722	0.901086	-0.0160472
K07770	5.46e-05	4.3e-05	5.46e-05	5.54e-05	4.1e-05	5.56e-05	3e-05	4.35e-05	4.38e-05	5.62e-05	2.47e-05	7.37e-05	5.14e-05	5.46e-05	3.26e-05	5.04e-05	2.88e-05	5.92e-05	0.85653	0.901086	-0.177839
K20118	0.000128943	0.000105788	0.000109224	9.8e-05	0.000127438	0.00011549	7.67e-05	0.000130548	8.76e-05	9.37e-05	9.37e-05	0.00011345	0.000102771	9.11e-05	0.000183296	8.19e-05	0.000173099	7.1e-05	0.856269	0.901086	-0.17262
K03046	0.000823249	0.000753736	0.000632589	0.00068999	0.000842004	0.000731435	0.000710602	0.000718016	0.000737016	0.000749225	0.0007198	0.00070339	0.000756769	0.000758965	0.000672087	0.000743738	0.000706819	0.00078735	0.856172	0.901086	0.691707
K01209	0.000357072	0.000380174	0.000245754	0.000396105	0.000345904	0.000376411	0.000427028	0.000424282	0.000434183	0.000276277	0.0003599	0.00043111	0.000345685	0.000443235	0.000439911	0.000409686	0.000331772	0.000301916	0.855172	0.900811	0.304383
K05245	0	0	4.55e-06	8.52e-06	0	0	0	0	0	0	0	0	0	0	4.07e-06	0	0	1.18e-05	0.85503	0.900811	-0.0222235
K03312	0.000114065	0.000181822	0.000163836	0.000144813	0.000168401	0.000175373	0.000166808	0.000141427	0.000164187	0.000182624	0.000162695	0.000119123	0.000205542	0.000109291	0.000179223	0.000100846	0.000177907	0.000159838	0.854602	0.900598	0.25779
K03483	9.92e-06	6.61e-06	0	1.28e-05	4.55e-06	8.55e-06	0	2.18e-05	3.65e-06	0	9.86e-06	1.13e-05	0	1.21e-05	1.22e-05	1.26e-05	4.81e-06	0	0.854145	0.90031	0.0568086
K02203	0.000163658	0.000178517	0.00013653	0.000229997	0.000245774	0.000201038	0.000190161	0.000255657	0.000222564	0.000224768	0.000202136	0.000255263	0.000196199	0.000157865	0.000219956	0.000157572	0.000192332	0.000189438	0.853375	0.899693	0.280708
K11051	0.000198373	0.000211575	0.00018204	0.000200182	0.000191158	0.000166819	0.000200169	0.000179504	0.000211619	0.000238815	0.000221856	0.000283625	0.000135471	0.00017608	9.78e-05	0.000157572	0.000177907	0.000219037	0.852813	0.899293	0.229841
K02570	4.96e-06	3.31e-06	4.55e-06	8.52e-06	9.1e-06	4.28e-06	6.67e-06	1.09e-05	7.3e-06	1.4e-05	0	0	9.34e-06	1.21e-05	0	1.89e-05	9.62e-06	0	0.852724	0.899293	-0.0627601
K19055	0.000292601	0.000376868	0.000373182	0.000366291	0.000295839	0.000333637	0.00034696	0.000342689	0.000368508	0.000341834	0.000315529	0.000351695	0.000322327	0.000382518	0.000285128	0.000365566	0.000307731	0.000396635	0.852083	0.898911	0.500037
K07569	0	6.61e-06	9.1e-06	0	4.55e-06	8.55e-06	1e-05	1.09e-05	7.3e-06	9.37e-06	4.93e-06	1.13e-05	4.67e-06	0	0	0	4.81e-06	1.78e-05	0.852075	0.898911	0.0595919
K03404	1.98e-05	1.65e-05	9.1e-06	2.98e-05	2.73e-05	2.99e-05	1.67e-05	2.18e-05	1.82e-05	1.4e-05	2.47e-05	3.4e-05	1.87e-05	2.43e-05	1.22e-05	3.15e-05	2.4e-05	1.18e-05	0.851323	0.898497	-0.142551
K10009	0.000119024	7.6e-05	7.74e-05	7.24e-05	9.56e-05	0.000102658	7.34e-05	8.7e-05	9.12e-05	8.9e-05	7.89e-05	0.000102105	8.88e-05	6.68e-05	7.74e-05	9.45e-05	0.000134632	7.7e-05	0.851182	0.898497	-0.251534
K13039	4.96e-06	9.92e-06	9.1e-06	4.26e-06	4.55e-06	4.28e-06	1e-05	1.63e-05	1.09e-05	9.37e-06	9.86e-06	1.13e-05	9.34e-06	6.07e-06	8.15e-06	6.3e-06	4.81e-06	1.18e-05	0.850724	0.898251	-0.126402
K03553	0.00110097	0.00104465	0.00110134	0.00102647	0.00113329	0.00104368	0.00105756	0.000968233	0.00109093	0.00107233	0.00119802	0.000992688	0.0010464	0.00109898	0.00100202	0.00101476	0.00102417	0.00107151	0.850589	0.898251	0.942929
K14101	0	3.31e-06	0	0	0	0	6.67e-06	0	3.65e-06	0	0	5.67e-06	0	0	0	0	0	5.92e-06	0.850193	0.898079	0.0284046
K02043	0	0	0	0	0	0	0	0	3.65e-06	0	0	0	0	0	0	0	4.81e-06	0	0.85007	0.898079	-0.0167845
K12660	0	0	0	0	0	0	0	0	3.65e-06	0	0	0	0	0	0	0	4.81e-06	0	0.85007	0.898079	-0.0167845
K17947	9.92e-06	3.31e-06	9.1e-06	4.26e-06	4.55e-06	8.55e-06	3.34e-06	1.09e-05	7.3e-06	4.68e-06	4.93e-06	1.13e-05	1.4e-05	0	1.22e-05	0	4.81e-06	5.92e-06	0.849866	0.898079	0.0810578
K06903	9.92e-05	0.000109093	0.000109224	7.67e-05	0.000104682	0.000111212	0.000103421	0.000163185	9.12e-05	9.37e-05	7.89e-05	0.000153158	0.000121457	0.000151793	6.92e-05	0.000126057	6.73e-05	0.000130238	0.849066	0.897662	-0.191386
K05884	4.96e-06	9.92e-06	1.37e-05	0	0	0	1e-05	0	7.3e-06	4.68e-06	0	5.67e-06	9.34e-06	0	8.15e-06	0	4.81e-06	1.78e-05	0.848878	0.897658	-0.049294
K00752	4.96e-06	9.92e-06	4.55e-06	8.52e-06	9.1e-06	4.28e-06	1.67e-05	5.44e-06	1.46e-05	0	0	5.67e-06	1.4e-05	1.82e-05	1.22e-05	1.89e-05	1.44e-05	0	0.848498	0.89745	-0.0715961
K06159	0	0	0	4.26e-06	4.55e-06	0	3.34e-06	0	7.3e-06	4.68e-06	0	0	0	6.07e-06	0	6.3e-06	4.81e-06	0	0.844399	0.893307	-0.0425253
K07219	3.97e-05	4.96e-05	8.19e-05	5.96e-05	5.01e-05	3.42e-05	4.34e-05	8.16e-05	5.47e-05	7.02e-05	7.4e-05	5.67e-05	5.14e-05	5.46e-05	4.89e-05	6.3e-05	3.85e-05	2.37e-05	0.84426	0.893307	0.175742
K12555	8.93e-05	0.000105788	8.65e-05	0.000127776	0.00013199	0.000141154	7.67e-05	3.81e-05	8.03e-05	0.000103018	0.000118323	8.51e-05	0.000102771	9.11e-05	6.52e-05	8.82e-05	7.69e-05	0.000124318	0.844002	0.893273	0.190513
K07664	0	0	0	0	4.55e-06	0	0	0	0	0	0	0	0	6.07e-06	0	0	0	0	0.843717	0.893165	-0.0174878
K05964	2.48e-05	5.29e-05	4.55e-05	3.83e-05	3.19e-05	2.99e-05	4e-05	3.81e-05	4.01e-05	3.75e-05	4.44e-05	3.97e-05	3.27e-05	4.86e-05	2.04e-05	4.41e-05	2.88e-05	5.33e-05	0.843215	0.892826	-0.2176
K09472	0	0	0	0	0	0	0	5.44e-06	0	0	0	0	0	0	4.07e-06	0	0	0	0.842733	0.892509	0.0175965
K01630	0	2.31e-05	1.82e-05	1.28e-05	0	1.28e-05	1.67e-05	1.09e-05	1.09e-05	1.4e-05	4.93e-06	5.67e-06	4.67e-06	2.43e-05	1.22e-05	3.15e-05	9.62e-06	5.92e-06	0.842331	0.892277	-0.0750356
K02916	0.00102658	0.00100168	0.00100577	0.00101369	0.000960339	0.00108646	0.000940797	0.000886641	0.000948635	0.000973993	0.00108463	0.000952981	0.00095764	0.000941116	0.000936848	0.00094543	0.000976084	0.00105375	0.840753	0.890798	0.955991
K06207	0.000897639	0.000895888	0.000855588	0.000894432	0.000960339	0.000902531	0.000847384	0.000805048	0.00083188	0.00089907	0.000907146	0.000913273	0.000882897	0.000850041	0.000859456	0.000844584	0.000884726	0.000882069	0.83895	0.88908	-1.29296
K15973	4.96e-06	3.31e-06	0	4.26e-06	0	0	1e-05	0	7.3e-06	0	0	5.67e-06	4.67e-06	6.07e-06	4.07e-06	6.3e-06	0	5.92e-06	0.838875	0.88908	-0.0580069
K11903	4.96e-06	3.31e-06	9.1e-06	0	4.55e-06	4.28e-06	3.34e-06	0	3.65e-06	4.68e-06	0	0	4.67e-06	6.07e-06	4.07e-06	0	4.81e-06	1.18e-05	0.837937	0.888391	-0.0641442
K03540	4.96e-06	9.92e-06	9.1e-06	4.26e-06	4.55e-06	4.28e-06	1e-05	5.44e-06	3.65e-06	4.68e-06	4.93e-06	1.13e-05	4.67e-06	6.07e-06	4.07e-06	6.3e-06	4.81e-06	1.18e-05	0.837443	0.888059	-0.12597
K09972	0	0	0	0	0	0	0	0	3.65e-06	0	4.93e-06	0	0	0	0	0	0	0	0.83734	0.888059	-0.0181925
K12136	0	0	0	0	0	0	0	0	3.65e-06	0	4.93e-06	0	0	0	0	0	0	0	0.83734	0.888059	-0.0181925
K03627	9.92e-06	1.32e-05	9.1e-06	4.26e-06	4.55e-06	8.55e-06	1.33e-05	1.09e-05	1.46e-05	9.37e-06	9.86e-06	1.7e-05	4.67e-06	1.82e-05	4.07e-06	1.26e-05	4.81e-06	1.18e-05	0.836919	0.888059	-0.123292
K07175	7.93e-05	7.27e-05	0.000113775	8.94e-05	0.000118336	0.000102658	9.01e-05	9.25e-05	0.000109458	8.9e-05	7.4e-05	9.08e-05	0.000126128	8.5e-05	9.78e-05	0.000113452	7.69e-05	0.000100639	0.835924	0.887218	0.327832
K09860	1.49e-05	0	1.37e-05	4.26e-06	4.55e-06	4.28e-06	3.34e-06	5.44e-06	7.3e-06	9.37e-06	4.93e-06	5.67e-06	9.34e-06	6.07e-06	4.07e-06	1.26e-05	9.62e-06	0	0.835561	0.887024	-0.0849714
K08224	0	3.31e-06	0	0	0	0	3.34e-06	1.09e-05	3.65e-06	4.68e-06	4.93e-06	5.67e-06	4.67e-06	0	4.07e-06	0	0	0	0.834603	0.8862	-0.0450175
K01758	4.96e-06	0	4.55e-06	4.26e-06	0	0	6.67e-06	5.44e-06	3.65e-06	0	4.93e-06	5.67e-06	0	6.07e-06	4.07e-06	6.3e-06	0	0	0.834555	0.8862	0.0638175
K14083	3.47e-05	1.65e-05	0.000232101	0.00021296	0	0	7.01e-05	0	0	6.09e-05	8.87e-05	1.7e-05	0	6.68e-05	1.22e-05	3.15e-05	9.62e-06	0.000207197	0.83444	0.8862	0.0411699
K14058	9.92e-06	1.32e-05	2.73e-05	8.52e-06	4.55e-06	8.55e-06	1.33e-05	1.63e-05	1.46e-05	2.34e-05	9.86e-06	2.27e-05	4.67e-06	1.21e-05	1.22e-05	6.3e-06	1.92e-05	1.18e-05	0.834072	0.8862	-0.112494
K00034	9.92e-06	1.32e-05	1.37e-05	1.7e-05	2.28e-05	2.14e-05	3e-05	5.44e-06	2.19e-05	3.28e-05	9.86e-06	2.27e-05	0	1.21e-05	2.85e-05	1.89e-05	3.37e-05	5.92e-06	0.83371	0.88602	-0.0995349
K08083	0	3.31e-06	0	0	0	4.28e-06	0	0	0	0	0	0	0	0	0	0	0	5.92e-06	0.83309	0.885554	0.0231341
K06932	9.92e-06	9.92e-06	4.55e-06	4.26e-06	9.1e-06	8.55e-06	1.33e-05	1.63e-05	3.65e-06	4.68e-06	9.86e-06	1.13e-05	4.67e-06	1.21e-05	4.07e-06	1.26e-05	4.81e-06	1.18e-05	0.832344	0.884953	0.122552
K14591	0	0	9.1e-06	1.28e-05	0	8.55e-06	6.67e-06	5.44e-06	7.3e-06	4.68e-06	4.93e-06	1.13e-05	4.67e-06	6.07e-06	0	6.3e-06	9.62e-06	5.92e-06	0.8323	0.884953	-0.0821999
K09979	4.96e-06	3.31e-06	9.1e-06	8.52e-06	1.37e-05	4.28e-06	3.34e-06	1.09e-05	7.3e-06	4.68e-06	4.93e-06	0	1.4e-05	1.21e-05	8.15e-06	1.26e-05	4.81e-06	0	0.831238	0.884161	0.0894819
K19354	0	0	9.1e-06	0	9.1e-06	4.28e-06	0	5.44e-06	3.65e-06	4.68e-06	0	1.13e-05	1.4e-05	0	0	0	0	5.92e-06	0.830865	0.883956	-0.0457716
K13607	0	0	4.55e-06	4.26e-06	4.55e-06	0	3.34e-06	1.09e-05	3.65e-06	4.68e-06	9.86e-06	0	4.67e-06	0	4.07e-06	0	4.81e-06	0	0.830418	0.883674	0.0554568
K02526	9.92e-06	2.31e-05	9.1e-06	2.13e-05	9.1e-06	1.28e-05	1.67e-05	2.18e-05	1.46e-05	2.34e-05	2.47e-05	1.13e-05	1.4e-05	1.21e-05	1.22e-05	1.26e-05	4.81e-06	1.78e-05	0.829926	0.883342	0.146283
K01046	8.43e-05	0.000102482	4.55e-05	0.000136294	0.000136541	0.000171096	0.000106757	0.000103351	0.000109458	0.000131114	8.38e-05	0.000119123	9.81e-05	6.68e-05	0.000101831	8.82e-05	0.000129824	0.000147998	0.829551	0.883134	0.202014
K15555	9.42e-05	6.28e-05	0.000104673	0.000110739	0.00013199	9.41e-05	7.67e-05	0.00010879	6.93e-05	0.000131114	5.42e-05	8.51e-05	7.47e-05	0.000103219	0.000122198	0.000107149	9.62e-05	0.000100639	0.829488	0.883134	-0.243064
K00183	0	6.61e-06	0	0	0	0	0	0	0	0	0	0	0	0	0	0	4.81e-06	0	0.82851	0.88241	0.0191666
K15664	4.96e-06	9.92e-06	1.37e-05	0	1.37e-05	2.14e-05	6.67e-06	0	0	9.37e-06	1.97e-05	1.13e-05	9.34e-06	0	8.15e-06	0	0	5.92e-06	0.828492	0.88241	0.0616883
K05541	4.96e-06	0	1.82e-05	0	0	4.28e-06	3.34e-06	5.44e-06	3.65e-06	4.68e-06	4.93e-06	5.67e-06	0	6.07e-06	0	6.3e-06	4.81e-06	1.18e-05	0.828001	0.882252	-0.0582437
K05988	1.98e-05	3.31e-06	9.1e-06	8.52e-06	1.82e-05	1.28e-05	1e-05	1.09e-05	1.46e-05	1.4e-05	4.93e-06	2.84e-05	4.67e-06	1.21e-05	4.07e-06	1.26e-05	1.44e-05	5.92e-06	0.827776	0.882204	0.10339
K03481	9.92e-06	9.92e-06	4.55e-06	0	0	4.28e-06	6.67e-06	1.09e-05	7.3e-06	0	4.93e-06	5.67e-06	9.34e-06	0	1.63e-05	0	4.81e-06	1.78e-05	0.825413	0.879877	-0.0663065
K18827	0	3.31e-06	4.55e-06	0	4.55e-06	4.28e-06	3.34e-06	0	0	4.68e-06	0	0	0	6.07e-06	0	1.26e-05	0	0	0.825116	0.879752	-0.0410746
K21578	0	9.92e-06	4.55e-06	4.26e-06	4.55e-06	1.71e-05	6.67e-06	1.09e-05	7.3e-06	4.68e-06	4.93e-06	1.13e-05	9.34e-06	6.07e-06	8.15e-06	0	4.81e-06	1.18e-05	0.825059	0.879752	0.0952969
K01761	3.97e-05	6.94e-05	5.92e-05	3.41e-05	3.19e-05	3.85e-05	5.34e-05	5.98e-05	4.74e-05	4.68e-05	4.93e-05	7.94e-05	3.74e-05	4.86e-05	3.67e-05	4.41e-05	2.88e-05	7.7e-05	0.824711	0.879704	-0.189393
K06897	0.000173577	0.000264469	0.000222999	0.000229997	0.000172952	0.000230979	0.000250212	0.000174064	0.000226213	0.000224768	0.000207066	0.000221228	0.000233571	0.000224654	0.000224029	0.000258417	0.000201948	0.000177598	0.82436	0.879521	-0.446746
K22468	9.92e-06	9.92e-06	1.37e-05	1.28e-05	1.37e-05	8.55e-06	6.67e-06	1.09e-05	7.3e-06	1.87e-05	4.93e-06	5.67e-06	9.34e-06	6.07e-06	1.22e-05	1.26e-05	1.92e-05	0	0.822866	0.878118	0.123731
K00254	3.97e-05	3.97e-05	5.01e-05	3.83e-05	3.64e-05	2.57e-05	3.34e-05	3.26e-05	3.65e-05	3.28e-05	2.47e-05	2.27e-05	3.27e-05	6.07e-05	2.85e-05	5.67e-05	3.37e-05	2.96e-05	0.822572	0.877996	0.205696
K18855	4.96e-06	9.92e-06	9.1e-06	4.26e-06	0	0	1e-05	0	7.3e-06	4.68e-06	0	1.13e-05	4.67e-06	6.07e-06	0	6.3e-06	4.81e-06	1.18e-05	0.821742	0.877301	-0.0760409
K19046	2.48e-05	2.98e-05	2.28e-05	2.98e-05	3.64e-05	3.85e-05	2e-05	3.81e-05	1.46e-05	1.87e-05	2.47e-05	5.67e-05	9.34e-06	3.04e-05	2.85e-05	3.15e-05	1.92e-05	4.74e-05	0.821421	0.87715	-0.146874
K15888	9.92e-06	1.65e-05	4.55e-06	4.26e-06	4.55e-06	8.55e-06	1e-05	1.09e-05	1.82e-05	4.68e-06	9.86e-06	1.7e-05	4.67e-06	1.21e-05	4.07e-06	1.26e-05	9.62e-06	1.78e-05	0.821299	0.87715	-0.118841
K02783	9.92e-06	3.64e-05	2.28e-05	4.69e-05	1.37e-05	2.14e-05	1.33e-05	1.63e-05	1.09e-05	4.68e-06	3.45e-05	4.54e-05	1.4e-05	2.43e-05	1.63e-05	1.26e-05	9.62e-06	1.78e-05	0.821129	0.87715	0.0982516
K19591	0	0	4.55e-06	0	0	0	0	0	7.3e-06	4.68e-06	0	0	0	0	0	0	4.81e-06	0	0.820851	0.877116	0.0298504
K01727	0	9.92e-06	0	0	0	0	3.34e-06	5.44e-06	3.65e-06	9.37e-06	4.93e-06	0	4.67e-06	0	0	0	0	0	0.820517	0.87695	0.0405091
K03713	0	0	0	0	0	0	3.34e-06	0	0	0	0	0	4.67e-06	0	0	0	0	0	0.819748	0.876319	-0.0201309
K01447	0.000133902	0.000109093	0.000113775	0.000102221	9.56e-05	9.84e-05	0.000106757	0.00011423	8.76e-05	9.37e-05	0.000108463	0.00011345	8.88e-05	0.000121434	4.48e-05	0.000126057	0.000120207	0.000124318	0.81954	0.876288	0.313295
K04802	4.96e-06	1.32e-05	1.37e-05	4.26e-06	4.55e-06	8.55e-06	1e-05	1.63e-05	1.09e-05	4.68e-06	9.86e-06	1.13e-05	4.67e-06	1.21e-05	4.07e-06	1.26e-05	4.81e-06	1.78e-05	0.819345	0.876271	0.124757
K14742	0.000694307	0.000651255	0.000700854	0.000660176	0.000700911	0.000667274	0.000657223	0.000625544	0.000631207	0.000721129	0.000680359	0.000606958	0.00072874	0.000649674	0.000659867	0.000693315	0.000668353	0.000615672	0.819339	0.876271	-1.14223
K02904	0.00120512	0.00116697	0.00116961	0.00113721	0.00119246	0.00118912	0.00108759	0.0011423	0.00110188	0.00118471	0.00130649	0.00112316	0.00121457	0.00112327	0.000981654	0.00124166	0.00107706	0.00121359	0.818449	0.875696	-0.957135
K01897	0.001463	0.00137854	0.00140171	0.00117554	0.00129259	0.00137732	0.00125439	0.00120757	0.00135728	0.00139543	0.00137551	0.00119123	0.00131267	0.00140864	0.00110385	0.00136142	0.00123573	0.00142078	0.818393	0.875696	0.783686
K02454	1.98e-05	2.31e-05	4.1e-05	2.56e-05	2.73e-05	1.71e-05	2.34e-05	1.63e-05	2.55e-05	2.81e-05	2.96e-05	2.27e-05	3.27e-05	2.43e-05	1.22e-05	2.52e-05	3.37e-05	1.78e-05	0.815225	0.872628	-0.217458
K03304	0	3.31e-06	0	0	0	0	0	0	0	0	0	0	4.67e-06	0	0	0	0	0	0.815212	0.872628	-0.0206292
K01892	0.00104642	0.00105788	0.000996669	0.000919987	0.00099675	0.000996634	0.000957477	0.000951915	0.000930392	0.00103018	0.00102547	0.000987016	0.000971654	0.0010079	0.000912409	0.000970641	0.000947234	0.00104783	0.815208	0.872628	-1.35057
K05575	9.92e-06	3.31e-06	4.55e-06	0	0	0	1.33e-05	0	0	0	4.93e-06	0	9.34e-06	6.07e-06	0	6.3e-06	0	0	0.814752	0.872628	0.0459364
K09962	0	3.31e-06	0	0	0	0	0	0	0	4.68e-06	0	0	0	0	0	0	0	0	0.814141	0.87223	-0.0207468
K07495	4.96e-06	3.31e-06	4.55e-06	4.26e-06	4.55e-06	4.28e-06	3.34e-06	0	3.65e-06	4.68e-06	4.93e-06	0	4.67e-06	6.07e-06	4.07e-06	6.3e-06	0	0	0.81407	0.87223	0.103896
K18924	1.49e-05	6.61e-06	9.1e-06	8.52e-06	4.55e-06	4.28e-06	3.34e-06	5.44e-06	3.65e-06	9.37e-06	4.93e-06	0	9.34e-06	6.07e-06	8.15e-06	1.26e-05	1.44e-05	0	0.813948	0.87223	-0.0998872
K01271	5.95e-05	6.28e-05	9.1e-05	5.54e-05	7.74e-05	4.71e-05	8.34e-05	8.16e-05	6.93e-05	7.49e-05	7.4e-05	0.000102105	4.2e-05	8.5e-05	6.11e-05	5.67e-05	7.69e-05	7.1e-05	0.813837	0.87223	-0.279984
K07032	0	9.92e-06	4.55e-06	0	0	4.28e-06	6.67e-06	0	3.65e-06	4.68e-06	0	0	4.67e-06	6.07e-06	4.07e-06	6.3e-06	0	0	0.812394	0.871121	0.0606417
K03978	0.00118528	0.00115044	0.00110589	0.00102221	0.0011515	0.00115062	0.000977494	0.000979112	0.00113106	0.00117066	0.00114872	0.00114585	0.00114917	0.00103219	0.00101831	0.00108409	0.00109148	0.00108335	0.81225	0.871121	-1.02277
K03075	0.000833168	0.000800019	0.000810078	0.000787952	0.000787387	0.00083837	0.000790669	0.000837685	0.000809988	0.000786686	0.000778962	0.000760115	0.000896911	0.000722535	0.000875749	0.00085719	0.000851068	0.00081103	0.81213	0.871121	-1.18442
K06972	0.000213251	0.000234716	0.000177489	0.000195923	0.000250325	0.000230979	0.00024354	0.000250218	0.00023351	0.000215402	0.000182415	0.000232573	0.000242913	0.000163936	0.0003503	0.000163874	0.000264456	0.000165758	0.811657	0.870904	0.303391
K15539	1.49e-05	3.31e-06	9.1e-06	0	0	4.28e-06	1.33e-05	5.44e-06	1.09e-05	0	0	5.67e-06	9.34e-06	1.21e-05	4.07e-06	1.26e-05	0	1.18e-05	0.810978	0.870365	0.0761141
K10011	0	6.61e-06	9.1e-06	8.52e-06	9.1e-06	0	2.34e-05	0	2.19e-05	9.37e-06	9.86e-06	2.27e-05	9.34e-06	0	8.15e-06	6.3e-06	4.81e-06	0	0.810955	0.870365	0.0678121
K02664	1.49e-05	3.31e-06	9.1e-06	4.26e-06	4.55e-06	4.28e-06	6.67e-06	5.44e-06	7.3e-06	9.37e-06	0	0	9.34e-06	6.07e-06	8.15e-06	6.3e-06	4.81e-06	1.18e-05	0.810898	0.870365	0.107339
K01639	0.000128943	0.000188434	0.000222999	0.000174627	0.000136541	0.000149709	0.000166808	0.000206701	0.000138647	0.000191989	0.000182415	0.000170175	0.000144814	0.000188223	0.000146637	0.000207995	0.000201948	0.000112479	0.810704	0.870365	-0.339661
K10725	9.92e-06	2.64e-05	9.1e-06	1.28e-05	1.37e-05	1.28e-05	2.34e-05	2.72e-05	2.55e-05	1.4e-05	1.48e-05	2.84e-05	9.34e-06	2.43e-05	8.15e-06	3.15e-05	9.62e-06	2.96e-05	0.810653	0.870365	-0.13736
K01785	0.000833168	0.000819854	0.000878343	0.000804988	0.000873863	0.000752822	0.000824031	0.000919278	0.000879312	0.000772638	0.000852914	0.000833858	0.000817497	0.000837897	0.000924629	0.000850887	0.000980892	0.00077551	0.81024	0.870365	-0.925693
K01215	4.46e-05	4.63e-05	7.28e-05	5.11e-05	5.92e-05	4.28e-05	4.67e-05	4.35e-05	4.74e-05	5.15e-05	2.47e-05	2.27e-05	7.01e-05	2.43e-05	7.74e-05	1.89e-05	0.000105782	3.55e-05	0.809786	0.870231	0.140369
K01599	0.000163658	0.000340504	0.00022755	0.000276848	0.000109233	0.000192483	0.00026022	0.000212141	0.00020797	0.000220085	0.000266228	0.00020421	0.000177514	0.000267156	0.000215882	0.00026472	0.000125016	0.000189438	0.809547	0.870165	0.242853
K01641	4.96e-06	1.32e-05	9.1e-06	1.28e-05	1.82e-05	8.55e-06	1.33e-05	1.09e-05	7.3e-06	4.68e-06	9.86e-06	1.13e-05	4.67e-06	1.82e-05	8.15e-06	1.89e-05	4.81e-06	2.37e-05	0.809432	0.870165	-0.127227
K03630	0.00113569	0.00119011	0.00122877	0.00125646	0.00129259	0.00123189	0.00121436	0.0010879	0.00118944	0.00118471	0.0012424	0.00124228	0.00122391	0.00123863	0.00116088	0.00115973	0.00116841	0.00126094	0.808246	0.869149	-1.50517
K02459	0	3.31e-06	9.1e-06	0	0	0	0	5.44e-06	0	4.68e-06	0	5.67e-06	0	0	0	0	4.81e-06	5.92e-06	0.807311	0.868334	-0.0461422
K04093	4.96e-06	1.65e-05	1.37e-05	4.26e-06	4.55e-06	1.28e-05	1.33e-05	1.09e-05	7.3e-06	1.4e-05	4.93e-06	1.13e-05	9.34e-06	6.07e-06	4.07e-06	6.3e-06	9.62e-06	1.78e-05	0.806236	0.867368	0.137361
K00634	0.000114065	9.59e-05	0.000100122	0.000123517	0.000118336	0.000106935	0.000136782	0.000146867	0.000138647	8.9e-05	0.000123253	0.000130468	0.000107442	0.000115363	0.000146637	0.000151269	0.000125016	0.000112479	0.805388	0.866647	-0.431494
K02062	0	3.31e-06	4.55e-06	4.26e-06	0	4.28e-06	3.34e-06	0	7.3e-06	0	9.86e-06	5.67e-06	0	0	4.07e-06	0	4.81e-06	5.92e-06	0.80533	0.866647	-0.0681636
K11893	4.96e-06	6.61e-06	9.1e-06	4.26e-06	4.55e-06	8.55e-06	0	0	0	4.68e-06	0	0	0	6.07e-06	8.15e-06	1.26e-05	4.81e-06	5.92e-06	0.804018	0.865553	-0.0757277
K00121	0	9.92e-06	0	0	0	0	3.34e-06	0	3.65e-06	0	4.93e-06	1.7e-05	0	0	0	0	0	0	0.803771	0.865477	-0.0307396
K02959	0.00118528	0.00122317	0.0011514	0.00120961	0.00117881	0.00114207	0.00114097	0.00102807	0.00118214	0.00119408	0.00128184	0.00110047	0.0011445	0.00114755	0.00106719	0.00121015	0.0011588	0.00120174	0.803674	0.865477	-1.28561
K00428	1.49e-05	4.96e-05	3.64e-05	2.13e-05	2.73e-05	2.14e-05	3e-05	5.44e-05	4.38e-05	3.28e-05	1.48e-05	3.97e-05	2.8e-05	4.86e-05	2.44e-05	5.04e-05	3.85e-05	3.55e-05	0.802115	0.864074	-0.181815
K09736	1.49e-05	6.61e-06	4.55e-06	4.26e-06	4.55e-06	8.55e-06	6.67e-06	1.09e-05	1.09e-05	4.68e-06	9.86e-06	1.13e-05	4.67e-06	1.21e-05	4.07e-06	1.26e-05	4.81e-06	1.18e-05	0.802111	0.864074	-0.149324
K07130	7.44e-05	0.000138846	0.000104673	0.000140554	9.56e-05	6.84e-05	0.000133446	0.000103351	0.000113106	8.43e-05	0.000138044	0.00013614	9.34e-05	0.000115363	8.15e-05	0.000107149	9.62e-05	0.000147998	0.801452	0.86374	-0.289579
K01730	1.49e-05	9.92e-06	0	8.52e-06	1.37e-05	8.55e-06	1e-05	1.63e-05	1.46e-05	4.68e-06	1.48e-05	5.67e-06	4.67e-06	1.82e-05	2.04e-05	1.89e-05	9.62e-06	5.92e-06	0.801096	0.863546	-0.127816
K02520	0.00116048	0.00114383	0.00117416	0.00119684	0.00116515	0.00114207	0.00117433	0.00114774	0.00116025	0.00120344	0.00119309	0.00112883	0.00118654	0.00117184	0.00106719	0.00114712	0.00119727	0.00120766	0.798772	0.861231	-2.29861
K09940	0	9.92e-06	4.55e-06	4.26e-06	4.55e-06	0	6.67e-06	0	7.3e-06	0	4.93e-06	5.67e-06	0	6.07e-06	0	6.3e-06	4.81e-06	5.92e-06	0.798674	0.861231	0.0836657
K02856	4.96e-05	5.29e-05	5.01e-05	5.11e-05	6.37e-05	4.28e-05	5.34e-05	7.07e-05	4.74e-05	4.21e-05	5.42e-05	4.54e-05	5.14e-05	7.29e-05	4.89e-05	7.56e-05	3.85e-05	6.51e-05	0.797738	0.860496	-0.332561
K09705	1.98e-05	1.65e-05	1.37e-05	1.28e-05	1.82e-05	4.28e-06	1.67e-05	1.09e-05	1.46e-05	4.68e-06	1.97e-05	1.13e-05	9.34e-06	2.43e-05	1.22e-05	2.52e-05	9.62e-06	1.78e-05	0.797621	0.860496	-0.166205
K00631	1.98e-05	9.92e-06	3.64e-05	8.52e-06	1.37e-05	1.28e-05	1.67e-05	2.72e-05	2.55e-05	2.34e-05	1.97e-05	1.13e-05	4.67e-06	3.04e-05	8.15e-06	3.15e-05	1.92e-05	1.18e-05	0.796532	0.859574	0.135742
K02886	0.00110097	0.00111738	0.00111044	0.00106054	0.00114695	0.00110785	0.00109092	0.00100631	0.00106904	0.0011332	0.00116351	0.000947308	0.00108844	0.00108684	0.000977581	0.0011093	0.00102897	0.00120174	0.795932	0.859115	1.14455
K07060	4.96e-06	9.92e-06	4.55e-06	4.26e-06	4.55e-06	8.55e-06	1e-05	1.09e-05	7.3e-06	9.37e-06	4.93e-06	1.7e-05	4.67e-06	6.07e-06	4.07e-06	6.3e-06	4.81e-06	1.18e-05	0.795348	0.858674	-0.143939
K10549	0	3.31e-06	0	8.52e-06	4.55e-06	0	6.67e-06	5.44e-06	3.65e-06	4.68e-06	9.86e-06	0	0	6.07e-06	4.07e-06	6.3e-06	4.81e-06	0	0.795149	0.858649	-0.0807182
K02907	0.00108609	0.00109755	0.00107404	0.00105202	0.00101951	0.00105224	0.00110427	0.00109334	0.00110552	0.00108638	0.00119802	0.00111748	0.00109311	0.00100183	0.0010957	0.000995853	0.00109629	0.00105375	0.794603	0.858248	-1.57306
K11896	4.96e-06	9.92e-06	9.1e-06	4.26e-06	0	8.55e-06	0	0	0	4.68e-06	0	5.67e-06	0	6.07e-06	4.07e-06	6.3e-06	0	5.92e-06	0.794053	0.857844	0.0746892
K15532	0.000317397	0.000277692	0.000263958	0.000259811	0.000273082	0.000260921	0.00028691	0.000359008	0.000237159	0.000243498	0.000271158	0.000323333	0.000270942	0.000291443	0.000443985	0.000271023	0.00025484	0.000224957	0.793629	0.857575	-0.381372
K07572	4.96e-06	9.92e-06	9.1e-06	4.26e-06	4.55e-06	8.55e-06	1.33e-05	1.09e-05	1.46e-05	4.68e-06	9.86e-06	1.13e-05	4.67e-06	1.21e-05	4.07e-06	1.26e-05	4.81e-06	1.18e-05	0.793158	0.857255	0.162405
K00156	0	0	9.1e-06	0	0	0	0	0	0	0	0	0	0	6.07e-06	0	6.3e-06	0	0	0.792739	0.856992	-0.0291648
K07480	0	9.92e-06	4.55e-06	0	1.82e-05	4.28e-06	1.33e-05	1.09e-05	3.65e-06	0	0	0	2.8e-05	6.07e-06	3.67e-05	6.3e-06	0	0	0.79187	0.856241	-0.0518002
K17488	4.96e-06	9.92e-06	4.55e-06	4.26e-06	4.55e-06	8.55e-06	1e-05	1.09e-05	1.09e-05	4.68e-06	4.93e-06	1.7e-05	4.67e-06	6.07e-06	4.07e-06	6.3e-06	4.81e-06	1.18e-05	0.791504	0.856035	0.140289
K02439	0	0	0	1.28e-05	9.1e-06	1.28e-05	3.34e-06	5.44e-06	3.65e-06	4.68e-06	4.93e-06	5.67e-06	9.34e-06	6.07e-06	1.22e-05	0	9.62e-06	0	0.791269	0.85597	-0.083463
K10013	4.96e-06	0	0	0	0	0	3.34e-06	0	0	0	0	0	0	6.07e-06	0	0	0	0	0.790977	0.855843	0.0291229
K03465	0.000629835	0.000555385	0.000496059	0.000523881	0.000491548	0.000573171	0.000630534	0.000527633	0.000609316	0.00052914	0.000581757	0.000510525	0.000425099	0.000752893	0.000411399	0.000680709	0.000476021	0.000568313	0.790466	0.855479	0.446268
K08096	0	3.31e-06	4.55e-06	0	0	0	6.67e-06	0	0	0	0	5.67e-06	0	0	0	0	0	5.92e-06	0.79019	0.85537	0.0404616
K13280	0.000659591	0.000624808	0.00059163	0.000604806	0.000673603	0.000645887	0.000530449	0.000473238	0.000583775	0.000697716	0.00069515	0.000504853	0.000710055	0.000437164	0.000549889	0.000397081	0.000610653	0.000674872	0.789549	0.854865	0.4429
K15924	1.49e-05	3.31e-06	4.55e-06	1.28e-05	1.37e-05	1.71e-05	3.34e-06	5.44e-06	0	0	9.86e-06	2.27e-05	4.67e-06	1.21e-05	4.07e-06	1.26e-05	4.81e-06	1.18e-05	0.789217	0.854694	-0.09709
K12234	0	3.31e-06	4.55e-06	0	0	4.28e-06	3.34e-06	0	7.3e-06	4.68e-06	0	1.13e-05	0	0	0	0	4.81e-06	5.92e-06	0.788937	0.85458	-0.0580533
K07506	4.96e-05	5.29e-05	6.83e-05	6.39e-05	4.55e-05	6.42e-05	7.67e-05	5.98e-05	7.66e-05	6.56e-05	4.44e-05	6.24e-05	5.14e-05	5.46e-05	4.89e-05	7.56e-05	9.62e-05	4.14e-05	0.786857	0.852515	0.303783
K00598	4.96e-05	2.31e-05	4.1e-05	5.11e-05	4.55e-05	5.99e-05	4e-05	5.98e-05	4.74e-05	2.34e-05	5.42e-05	4.54e-05	4.67e-05	5.46e-05	4.89e-05	6.3e-05	4.81e-05	1.78e-05	0.786519	0.852338	0.25274
K01437	0	3.31e-06	4.55e-06	4.26e-06	4.55e-06	4.28e-06	3.34e-06	0	3.65e-06	4.68e-06	0	0	4.67e-06	6.07e-06	4.07e-06	6.3e-06	4.81e-06	0	0.785967	0.851929	-0.104395
K16212	8.43e-05	9.59e-05	7.28e-05	0.000102221	0.00010013	0.000102658	9.67e-05	0.000119669	0.000113106	8.43e-05	8.87e-05	0.000124795	9.81e-05	9.11e-05	0.000114051	0.000100846	0.000120207	8.29e-05	0.784773	0.850823	-0.491014
K18209	1.49e-05	1.32e-05	1.37e-05	0	0	4.28e-06	1.67e-05	0	7.3e-06	4.68e-06	4.93e-06	1.7e-05	0	1.82e-05	0	6.3e-06	9.62e-06	1.78e-05	0.784293	0.85049	-0.0847661
K04757	3.97e-05	4.96e-05	5.01e-05	3.83e-05	2.28e-05	3.42e-05	4.34e-05	8.7e-05	5.11e-05	5.62e-05	5.42e-05	5.11e-05	1.87e-05	7.89e-05	3.67e-05	8.19e-05	3.85e-05	2.37e-05	0.783567	0.849891	-0.175304
K15051	0.000332275	0.000290916	0.000304917	0.000302403	0.000359558	0.000372134	0.00026022	0.000271976	0.000273645	0.00044017	0.000295808	0.000277953	0.000373713	0.000188223	0.000358446	0.0002206	0.000355814	0.000331516	0.782542	0.848968	-0.370511
K16509	3.47e-05	2.31e-05	2.28e-05	1.28e-05	3.19e-05	1.71e-05	2e-05	1.63e-05	2.92e-05	1.4e-05	9.86e-06	2.84e-05	2.8e-05	1.82e-05	2.44e-05	1.89e-05	1.44e-05	4.14e-05	0.781951	0.848515	0.193221
K09923	0	3.31e-06	0	0	0	0	0	5.44e-06	0	0	0	0	0	0	0	6.3e-06	0	0	0.78192	0.848515	0.0302777
K01903	5.46e-05	4.96e-05	6.83e-05	3.41e-05	3.64e-05	3.42e-05	5.34e-05	3.26e-05	4.74e-05	3.75e-05	5.42e-05	4.54e-05	2.34e-05	6.68e-05	2.04e-05	6.3e-05	2.88e-05	5.33e-05	0.780881	0.847729	0.224642
K16147	0	6.61e-06	4.55e-06	8.52e-06	9.1e-06	4.28e-06	1.33e-05	1.09e-05	1.09e-05	9.37e-06	4.93e-06	5.67e-06	4.67e-06	1.21e-05	4.07e-06	6.3e-06	4.81e-06	1.18e-05	0.779623	0.846552	0.149577
K03618	4.96e-06	3.31e-06	4.55e-06	4.26e-06	4.55e-06	4.28e-06	3.34e-06	5.44e-06	3.65e-06	4.68e-06	0	0	4.67e-06	6.07e-06	4.07e-06	6.3e-06	9.62e-06	0	0.779596	0.846552	0.126786
K06880	0	6.61e-06	9.1e-06	8.52e-06	9.1e-06	4.28e-06	1.67e-05	1.63e-05	7.3e-06	0	0	5.67e-06	1.87e-05	1.21e-05	1.63e-05	1.26e-05	4.81e-06	0	0.779026	0.846278	0.0970114
K15915	1.98e-05	2.64e-05	4.1e-05	1.7e-05	2.73e-05	1.71e-05	3e-05	0	3.65e-05	2.34e-05	2.47e-05	1.7e-05	2.8e-05	3.64e-05	3.26e-05	1.26e-05	9.62e-06	1.78e-05	0.778812	0.846234	0.163089
K11635	0	3.31e-06	0	4.26e-06	0	0	0	0	0	0	0	0	0	0	4.07e-06	0	0	5.92e-06	0.777897	0.845428	-0.0371294
K00558	0.00219202	0.00215873	0.00211166	0.00239367	0.00258518	0.00239534	0.00229528	0.00260553	0.00234605	0.00228982	0.00247	0.00254695	0.00208812	0.00265334	0.00190628	0.00260939	0.00231279	0.00246861	0.77755	0.845238	-0.831789
K06927	4.96e-06	1.65e-05	9.1e-06	4.26e-06	4.55e-06	8.55e-06	1.67e-05	1.63e-05	1.46e-05	1.4e-05	9.86e-06	1.7e-05	4.67e-06	1.21e-05	4.07e-06	1.26e-05	4.81e-06	2.37e-05	0.77746	0.845238	-0.139772
K04044	9.92e-06	9.92e-06	9.1e-06	1.28e-05	2.28e-05	8.55e-06	3.34e-06	1.63e-05	3.65e-06	1.4e-05	1.48e-05	0	9.34e-06	1.82e-05	4.07e-06	1.89e-05	1.92e-05	5.92e-06	0.776922	0.844931	-0.128794
K07066	4.96e-06	0	4.55e-06	8.52e-06	9.1e-06	1.28e-05	6.67e-06	0	0	0	4.93e-06	5.67e-06	4.67e-06	6.07e-06	8.15e-06	0	0	1.18e-05	0.775932	0.844042	0.0862365
K11783	4.96e-06	1.32e-05	1.37e-05	8.52e-06	9.1e-06	8.55e-06	1e-05	1.63e-05	1.09e-05	9.37e-06	9.86e-06	0	9.34e-06	1.82e-05	8.15e-06	1.89e-05	9.62e-06	5.92e-06	0.774084	0.842218	0.166621
K07501	4.96e-06	9.92e-06	1.82e-05	8.52e-06	9.1e-06	4.28e-06	1.67e-05	1.63e-05	1.82e-05	1.4e-05	9.86e-06	5.67e-06	9.34e-06	1.82e-05	8.15e-06	1.89e-05	9.62e-06	5.92e-06	0.773895	0.842201	0.167565
K08309	0.000406665	0.000433068	0.000314019	0.000404624	0.000391418	0.000432017	0.000400339	0.000282855	0.000394048	0.000398026	0.000433852	0.000368713	0.000355027	0.000449307	0.000268835	0.000428595	0.000432746	0.000390715	0.773768	0.842201	-0.555938
K13979	4.96e-06	9.92e-06	9.1e-06	8.52e-06	1.37e-05	8.55e-06	2e-05	1.63e-05	2.19e-05	1.4e-05	0	5.67e-06	1.4e-05	2.43e-05	1.22e-05	2.52e-05	1.44e-05	1.18e-05	0.773374	0.842008	-0.145086
K00712	0	0	0	0	9.1e-06	0	0	0	0	0	0	0	0	0	0	0	0	5.92e-06	0.773347	0.842008	0.0251942
K11189	0.00115552	0.00126945	0.00111955	0.00118406	0.00117425	0.00125328	0.00112762	0.00123477	0.00111647	0.00120812	0.00108956	0.00107778	0.0011445	0.000977547	0.00143786	0.000951733	0.00147615	0.00110111	0.772369	0.841288	0.665463
K01584	9.92e-06	9.92e-06	1.82e-05	4.26e-06	0	0	1e-05	0	1.09e-05	4.68e-06	4.93e-06	5.67e-06	9.34e-06	1.82e-05	4.07e-06	1.26e-05	4.81e-06	5.92e-06	0.771856	0.840916	-0.10275
K21065	1.49e-05	6.61e-06	2.73e-05	1.28e-05	1.82e-05	1.28e-05	1.33e-05	2.72e-05	1.46e-05	2.34e-05	9.86e-06	5.67e-06	1.87e-05	3.64e-05	8.15e-06	3.78e-05	1.44e-05	5.92e-06	0.771146	0.840329	-0.13311
K10907	0.000550486	0.000505797	0.000509712	0.00063462	0.000559819	0.000581726	0.000560475	0.000630983	0.000591073	0.000561919	0.000507804	0.000538888	0.000569912	0.00056467	0.000627281	0.000573561	0.00064912	0.000467674	0.770638	0.839963	0.871733
K12554	9.92e-06	0	0	0	0	4.28e-06	0	0	0	0	0	0	0	6.07e-06	0	6.3e-06	0	5.92e-06	0.770394	0.839884	-0.0435128
K06889	0.00128943	0.00134218	0.00140626	0.00131183	0.00125618	0.0011164	0.0014212	0.00127285	0.00143025	0.00125964	0.00142481	0.00133871	0.0011772	0.00145114	0.00113644	0.00147487	0.00122131	0.0015155	0.770091	0.839741	-0.855861
K20882	0	3.31e-06	0	4.26e-06	0	0	0	5.44e-06	0	0	0	0	0	6.07e-06	4.07e-06	0	0	0	0.76876	0.838476	0.0448315
K01736	0.000857965	0.000816548	0.000901098	0.000860358	0.000819247	0.000872589	0.00089409	0.000946475	0.000868366	0.000880339	0.000887425	0.000884911	0.000854869	0.000819682	0.000940922	0.000850887	0.000928001	0.00084063	0.768471	0.838348	-1.72039
K15856	2.98e-05	3.64e-05	1.82e-05	5.54e-05	8.19e-05	5.99e-05	4.34e-05	4.9e-05	2.92e-05	2.34e-05	2.96e-05	4.54e-05	5.61e-05	6.07e-05	5.7e-05	5.67e-05	3.37e-05	1.78e-05	0.768114	0.838145	0.192115
K09944	0	3.31e-06	4.55e-06	0	0	0	3.34e-06	0	0	4.68e-06	0	0	0	0	4.07e-06	0	0	0	0.767188	0.837321	0.0458916
K17202	9.92e-06	1.32e-05	9.1e-06	1.28e-05	9.1e-06	1.71e-05	1e-05	1.63e-05	1.09e-05	9.37e-06	1.48e-05	1.13e-05	4.67e-06	1.21e-05	8.15e-06	2.52e-05	4.81e-06	1.18e-05	0.76711	0.837321	0.190969
K19139	2.48e-05	2.98e-05	2.28e-05	3.41e-05	2.73e-05	2.57e-05	4e-05	5.98e-05	3.65e-05	2.34e-05	4.44e-05	3.97e-05	3.27e-05	4.25e-05	3.26e-05	3.78e-05	1.44e-05	4.74e-05	0.766951	0.837321	-0.24661
K13818	4.96e-06	9.92e-06	9.1e-06	8.52e-06	4.55e-06	4.28e-06	6.67e-06	5.44e-06	0	9.37e-06	9.86e-06	0	1.87e-05	0	2.44e-05	0	0	0	0.766884	0.837321	-0.073589
K19142	0	3.31e-06	1.37e-05	1.28e-05	1.37e-05	8.55e-06	2e-05	0	1.46e-05	4.68e-06	4.93e-06	1.13e-05	1.4e-05	1.82e-05	1.22e-05	1.89e-05	4.81e-06	5.92e-06	0.766148	0.836933	-0.124743
K17104	4.96e-06	9.92e-06	9.1e-06	4.26e-06	4.55e-06	8.55e-06	1.33e-05	1.09e-05	1.09e-05	4.68e-06	9.86e-06	1.7e-05	4.67e-06	1.21e-05	4.07e-06	1.26e-05	4.81e-06	1.18e-05	0.766078	0.836933	-0.174635
K07262	4.96e-06	3.31e-06	4.55e-06	4.26e-06	4.55e-06	4.28e-06	3.34e-06	5.44e-06	3.65e-06	4.68e-06	0	0	9.34e-06	6.07e-06	4.07e-06	6.3e-06	4.81e-06	0	0.765888	0.836933	0.136685
K16692	4.96e-06	3.31e-06	9.1e-06	8.52e-06	9.1e-06	1.28e-05	6.67e-06	5.44e-06	7.3e-06	9.37e-06	0	0	4.67e-06	1.21e-05	8.15e-06	1.26e-05	1.44e-05	0	0.764517	0.835711	0.125433
K16843	0	0	0	0	0	0	3.34e-06	0	3.65e-06	4.68e-06	0	0	4.67e-06	0	0	0	0	0	0.763927	0.835252	-0.0401519
K18151	0	0	4.55e-06	4.26e-06	4.55e-06	0	3.34e-06	0	3.65e-06	0	0	0	4.67e-06	6.07e-06	0	6.3e-06	0	0	0.763651	0.835137	0.0656651
K07038	3.47e-05	4.63e-05	2.28e-05	1.7e-05	6.83e-05	5.13e-05	2.34e-05	4.35e-05	1.82e-05	2.81e-05	2.96e-05	2.84e-05	3.74e-05	4.25e-05	5.7e-05	3.15e-05	4.81e-05	4.14e-05	0.763576	0.835137	-0.210509
K04078	0.00120512	0.00116366	0.0011423	0.00116702	0.00119701	0.00117201	0.00115765	0.00105526	0.00116025	0.00118939	0.0012424	0.00111748	0.00109311	0.0011172	0.00108756	0.00117233	0.00117322	0.00116623	0.762782	0.834559	1.98335
K07689	0	0	4.55e-06	0	0	0	0	5.44e-06	3.65e-06	0	4.93e-06	5.67e-06	0	0	0	0	0	0	0.762481	0.834416	0.0468249
K07453	0	0	4.55e-06	8.52e-06	4.55e-06	0	0	5.44e-06	0	0	0	5.67e-06	4.67e-06	0	4.07e-06	0	4.81e-06	0	0.761176	0.833175	0.0653903
K02488	1.49e-05	9.92e-06	4.55e-06	8.52e-06	1.37e-05	1.71e-05	1.67e-05	1.09e-05	1.46e-05	0	1.48e-05	5.67e-06	1.4e-05	3.04e-05	4.07e-06	2.52e-05	0	5.92e-06	0.760462	0.832579	0.116393
K00285	4.96e-06	3.31e-06	4.55e-06	4.26e-06	4.55e-06	4.28e-06	3.34e-06	5.44e-06	3.65e-06	0	0	0	9.34e-06	6.07e-06	8.15e-06	6.3e-06	4.81e-06	0	0.759968	0.832224	0.119381
K03544	0.0010117	0.00100168	0.000951159	0.00100943	0.00111053	0.0010223	0.00103087	0.00103351	0.00109093	0.0010255	0.00106984	0.00101538	0.00106508	0.000922901	0.00112014	0.000926521	0.00102417	0.00101823	0.759848	0.832224	1.49064
K00702	0.000173577	0.000168599	0.000122877	0.000166109	0.000227569	0.000209592	0.000193497	0.000168625	0.000193376	0.000187306	0.000172555	0.000215555	0.000154157	0.00017608	0.000240322	0.00017648	0.000192332	0.000147998	0.759667	0.832224	-0.507481
K00713	9.92e-06	1.32e-05	4.55e-06	4.26e-06	4.55e-06	8.55e-06	1.67e-05	5.44e-06	1.46e-05	4.68e-06	0	1.7e-05	9.34e-06	6.07e-06	4.07e-06	1.26e-05	9.62e-06	1.18e-05	0.759523	0.832224	0.143466
K03740	9.92e-06	9.92e-06	4.55e-06	8.52e-06	4.55e-06	4.28e-06	1e-05	5.44e-06	7.3e-06	9.37e-06	4.93e-06	1.13e-05	4.67e-06	1.21e-05	8.15e-06	1.26e-05	0	5.92e-06	0.758329	0.831174	-0.178188
K02908	4.96e-06	9.92e-06	9.1e-06	4.26e-06	1.82e-05	1.28e-05	1.33e-05	1.09e-05	1.82e-05	9.37e-06	1.48e-05	1.13e-05	4.67e-06	1.82e-05	4.07e-06	1.89e-05	9.62e-06	1.78e-05	0.758118	0.831128	-0.180891
K07558	4.96e-06	9.92e-06	9.1e-06	4.26e-06	4.55e-06	8.55e-06	1.33e-05	1.09e-05	1.09e-05	4.68e-06	9.86e-06	1.13e-05	4.67e-06	1.21e-05	4.07e-06	1.26e-05	4.81e-06	1.78e-05	0.757793	0.830958	-0.177601
K15986	0.000362031	0.000386786	0.000400488	0.00037055	0.000400521	0.00042774	0.000310263	0.000342689	0.000353914	0.000379295	0.00036976	0.000346023	0.000425099	0.000309658	0.000460278	0.000340355	0.00039428	0.000384795	0.756165	0.829359	-0.768459
K01873	0.000783575	0.000783489	0.000691752	0.000736841	0.000819247	0.000757099	0.000773989	0.000723455	0.000758908	0.000744542	0.0007198	0.000805496	0.000775455	0.000783252	0.0007006	0.000800464	0.000750094	0.00079919	0.755765	0.829106	-1.68681
K02963	0.00119024	0.00123639	0.00116051	0.00114998	0.00125618	0.00118056	0.00116766	0.00108246	0.00118944	0.00119408	0.00128677	0.00122526	0.00121457	0.00114755	0.00111607	0.00114712	0.00114918	0.00120174	0.755757	0.829106	-1.92164
K02961	0.0011704	0.001243	0.00123332	0.00117554	0.00124708	0.00121478	0.00116766	0.00115318	0.00122593	0.00118471	0.00131142	0.00120257	0.00123325	0.00119006	0.00103461	0.00125427	0.00124054	0.00126094	0.755448	0.829106	-1.66393
K21592	9.92e-06	3.31e-06	9.1e-06	1.28e-05	9.1e-06	8.55e-06	6.67e-06	5.44e-06	3.65e-06	9.37e-06	1.48e-05	5.67e-06	1.4e-05	0	8.15e-06	0	4.81e-06	5.92e-06	0.755437	0.829106	0.140652
K11751	0.000381869	0.000300833	0.000314019	0.000306662	0.000304942	0.000252366	0.000316935	0.00033181	0.000342968	0.000290325	0.000320459	0.00029497	0.000336342	0.000303586	0.000232175	0.000302538	0.000322156	0.000396635	0.75517	0.829106	0.663779
K07289	4.96e-06	0	4.55e-06	4.26e-06	0	0	0	0	0	0	4.93e-06	0	0	6.07e-06	0	6.3e-06	0	0	0.755068	0.829106	-0.0550615
K00390	0.000123983	0.000115705	0.00013653	0.000132035	0.000122887	0.000136877	0.000110093	0.00011423	0.000109458	0.000112384	0.000128184	0.000147485	9.81e-05	0.000103219	0.000142564	0.000113452	0.000134632	0.000142078	0.754966	0.829106	-0.685922
K07051	0	6.61e-06	1.37e-05	4.26e-06	0	4.28e-06	6.67e-06	0	3.65e-06	0	4.93e-06	1.13e-05	0	0	0	0	4.81e-06	1.18e-05	0.753758	0.828204	0.0719519
K03697	1.98e-05	2.64e-05	1.37e-05	4.26e-06	5.46e-05	3.85e-05	1.67e-05	3.81e-05	2.55e-05	1.87e-05	3.94e-05	0	3.74e-05	1.21e-05	4.07e-05	0	4.33e-05	2.37e-05	0.751911	0.826359	0.130672
K18831	7.44e-05	3.64e-05	6.83e-05	4.26e-05	5.46e-05	5.13e-05	4.67e-05	2.72e-05	4.38e-05	3.28e-05	3.94e-05	3.97e-05	3.27e-05	7.29e-05	3.26e-05	9.45e-05	3.37e-05	4.14e-05	0.751616	0.82622	0.217562
K04784	4.96e-06	6.61e-06	4.55e-06	4.26e-06	4.55e-06	0	0	0	0	0	0	0	4.67e-06	6.07e-06	4.07e-06	6.3e-06	0	0	0.750739	0.825442	0.0781689
K20525	4.96e-06	3.31e-06	4.55e-06	0	0	0	0	5.44e-06	0	0	0	0	4.67e-06	6.07e-06	4.07e-06	0	0	0	0.748773	0.823466	0.0631848
K03232	4.96e-06	1.32e-05	4.55e-06	4.26e-06	4.55e-06	8.55e-06	1.33e-05	1.63e-05	1.09e-05	4.68e-06	9.86e-06	1.7e-05	4.67e-06	1.21e-05	4.07e-06	1.26e-05	4.81e-06	1.78e-05	0.748244	0.823068	-0.158588
K01952	0.000540567	0.000532244	0.000559773	0.000523881	0.00056437	0.000538952	0.00050376	0.000696258	0.000532695	0.000482314	0.000517665	0.000510525	0.000616626	0.000540383	0.000647647	0.000497926	0.000596228	0.000503194	0.748094	0.823068	0.820779
K02866	4.96e-06	1.32e-05	9.1e-06	4.26e-06	1.37e-05	8.55e-06	1.67e-05	1.09e-05	1.46e-05	4.68e-06	1.48e-05	1.13e-05	4.67e-06	2.43e-05	4.07e-06	1.26e-05	9.62e-06	1.78e-05	0.748089	0.823068	-0.168297
K11050	0.000188455	0.000208269	0.000177489	0.00021296	0.000172952	0.000136877	0.000196833	0.000130548	0.000197024	0.000220085	0.000197206	0.000277953	0.000126128	0.000157865	0.000118124	0.000157572	0.000158674	0.000272317	0.747924	0.823068	-0.340272
K16783	0	3.31e-06	0	0	0	4.28e-06	0	0	0	0	0	0	0	0	0	0	0	1.18e-05	0.747332	0.822804	-0.03072
K14155	0.000714144	0.000624808	0.000655344	0.000685731	0.000614435	0.000658719	0.000617189	0.00078329	0.000689585	0.000655572	0.000675429	0.000629648	0.000686698	0.000643602	0.000806504	0.000623984	0.000711627	0.000686712	0.747096	0.82273	-1.0621
K21701	1.49e-05	6.61e-06	4.55e-06	1.7e-05	4.55e-06	8.55e-06	1.33e-05	0	1.46e-05	1.4e-05	9.86e-06	5.67e-06	2.8e-05	1.21e-05	8.15e-06	6.3e-06	9.62e-06	0	0.744793	0.820378	-0.125558
K05565	0	6.61e-06	9.1e-06	0	0	8.55e-06	1e-05	0	7.3e-06	0	9.86e-06	5.67e-06	9.34e-06	6.07e-06	4.07e-06	6.3e-06	0	5.92e-06	0.74354	0.819182	-0.107712
K21053	0	0	0	0	0	0	3.34e-06	0	3.65e-06	4.68e-06	4.93e-06	0	0	0	0	0	0	0	0.74339	0.819182	-0.0436326
K18678	3.47e-05	2.31e-05	3.19e-05	1.28e-05	1.82e-05	4.71e-05	3.34e-05	1.63e-05	3.65e-05	4.21e-05	2.47e-05	3.4e-05	1.4e-05	3.64e-05	1.63e-05	3.15e-05	9.62e-06	2.96e-05	0.743364	0.819182	0.214857
K06187	0.00127951	0.00125623	0.00128338	0.00122239	0.00123342	0.00124472	0.00123771	0.00107702	0.00125147	0.00125495	0.00127198	0.00122526	0.00121457	0.00118399	0.0011731	0.00128579	0.00116361	0.00123726	0.74297	0.819108	2.02596
K07443	0.00014878	0.000201658	0.000204795	0.000144813	0.000127438	0.000111212	0.000156799	0.00011423	0.000142295	0.000131114	0.000142974	0.00018152	0.000158828	0.000151793	8.96e-05	0.000157572	0.000129824	0.000165758	0.742666	0.818957	0.428289
K00936	1.98e-05	2.64e-05	2.28e-05	2.13e-05	2.28e-05	2.14e-05	2e-05	1.63e-05	2.55e-05	1.87e-05	9.86e-06	3.4e-05	2.34e-05	1.21e-05	2.44e-05	1.26e-05	2.88e-05	2.37e-05	0.742608	0.818957	0.304366
K16788	1.98e-05	1.65e-05	1.82e-05	1.28e-05	2.73e-05	2.57e-05	1e-05	2.18e-05	1.09e-05	1.4e-05	1.97e-05	0	3.27e-05	2.43e-05	3.26e-05	3.15e-05	9.62e-06	1.18e-05	0.742254	0.818871	-0.178328
K19824	0	3.31e-06	4.55e-06	0	0	0	3.34e-06	0	3.65e-06	0	0	5.67e-06	0	0	0	0	0	5.92e-06	0.741574	0.818306	0.0566732
K05571	0.000104146	0.000122317	0.000122877	0.000144813	0.000113784	0.000124045	0.000126774	0.000130548	0.000124052	0.000112384	0.000128184	0.000124795	0.000144814	0.000127506	0.000154784	9.45e-05	9.62e-05	0.000106559	0.741408	0.818306	0.652348
K09924	4.96e-06	6.61e-06	9.1e-06	0	0	4.28e-06	2e-05	5.44e-06	1.46e-05	0	4.93e-06	0	4.67e-06	1.82e-05	8.15e-06	1.89e-05	0	0	0.741241	0.818306	0.0828043
K10543	1.49e-05	1.65e-05	2.73e-05	3.83e-05	4.1e-05	8.55e-06	4e-05	3.26e-05	4.74e-05	3.75e-05	2.96e-05	5.67e-05	2.8e-05	2.43e-05	2.85e-05	3.15e-05	2.4e-05	2.37e-05	0.741114	0.818306	-0.223758
K01104	0.00155723	0.00154384	0.00154279	0.00161849	0.00167946	0.0016853	0.00152462	0.0015285	0.00154336	0.00163425	0.00144453	0.00153725	0.00169572	0.00144507	0.00164967	0.00136142	0.00173099	0.00158062	0.739124	0.816339	1.39977
K21344	9.92e-06	9.92e-06	4.55e-06	8.52e-06	4.55e-06	4.28e-06	6.67e-06	5.44e-06	7.3e-06	4.68e-06	4.93e-06	0	9.34e-06	1.21e-05	8.15e-06	1.89e-05	9.62e-06	0	0.736591	0.813725	-0.142585
K02884	0.00122496	0.00115375	0.00111044	0.00119257	0.00118791	0.00115917	0.00116766	0.00104439	0.00114931	0.00116598	0.00122761	0.00112883	0.00118187	0.00114755	0.00102646	0.0010967	0.00112514	0.00120766	0.736497	0.813725	1.82839
K07227	9.92e-06	0	4.55e-06	0	0	1.28e-05	0	5.44e-06	0	4.68e-06	0	0	9.34e-06	6.07e-06	0	6.3e-06	0	0	0.736135	0.813587	0.0682205
K02860	0.0011952	0.00117689	0.00111955	0.00112017	0.00118336	0.00118912	0.00111761	0.00107158	0.00114201	0.00118471	0.00119309	0.00114585	0.00120055	0.00110505	0.00110385	0.00115973	0.00106263	0.00123135	0.735702	0.813292	-2.12448
K03625	0.00116544	0.00120995	0.0011332	0.00121387	0.00118791	0.00118056	0.00111428	0.00110966	0.00113106	0.00118003	0.00114379	0.00114585	0.0012099	0.00113541	0.00109163	0.00111561	0.00114437	0.00121951	0.735197	0.812919	2.55846
K02460	0	6.61e-06	1.37e-05	0	0	0	3.34e-06	5.44e-06	3.65e-06	4.68e-06	0	5.67e-06	0	6.07e-06	0	0	4.81e-06	5.92e-06	0.734678	0.812528	0.0790562
K01198	0.000198373	0.000228104	0.000200244	0.000293885	0.000286736	0.000282308	0.000283573	0.000326371	0.000248105	0.000243498	0.000246507	0.00029497	0.000210214	0.000273227	0.00033808	0.000252115	0.000211565	0.000213117	0.732678	0.810499	0.538885
K00955	9.92e-06	2.31e-05	3.19e-05	2.98e-05	3.64e-05	3.42e-05	3.34e-05	3.81e-05	2.92e-05	3.75e-05	2.96e-05	4.54e-05	2.34e-05	1.82e-05	6.11e-05	2.52e-05	1.92e-05	2.37e-05	0.732419	0.810396	-0.238727
K21055	0	6.61e-06	0	4.26e-06	9.1e-06	8.55e-06	3.34e-06	0	3.65e-06	4.68e-06	4.93e-06	0	0	6.07e-06	4.07e-06	6.3e-06	4.81e-06	0	0.732413	0.810396	0.107192
K03487	2.48e-05	2.64e-05	1.37e-05	3.41e-05	3.19e-05	1.71e-05	1.33e-05	2.72e-05	1.82e-05	1.87e-05	9.86e-06	2.27e-05	2.34e-05	2.43e-05	4.07e-05	6.3e-06	2.4e-05	2.37e-05	0.73157	0.809822	0.232084
K01866	0.000991867	0.000981841	0.000978465	0.000937024	0.00104681	0.000941028	0.000954141	0.00089208	0.000941338	0.00101145	0.000961377	0.000998361	0.000938954	0.00102005	0.000883896	0.000964338	0.000884726	0.00108335	0.731199	0.809595	-1.61154
K13527	4.96e-06	0	0	0	0	0	3.34e-06	0	3.65e-06	4.68e-06	0	0	0	0	0	0	4.81e-06	5.92e-06	0.730968	0.809522	-0.060052
K18856	2.98e-05	1.98e-05	3.19e-05	2.56e-05	9.1e-06	2.57e-05	3.67e-05	2.18e-05	3.65e-05	1.87e-05	4.93e-05	3.97e-05	1.87e-05	2.43e-05	3.26e-05	2.52e-05	1.92e-05	2.37e-05	0.730184	0.808837	-0.257292
K11892	0	6.61e-06	9.1e-06	1.28e-05	4.55e-06	4.28e-06	0	0	0	0	0	0	0	6.07e-06	8.15e-06	6.3e-06	4.81e-06	5.92e-06	0.72992	0.808727	0.0862248
K03702	0.000912517	0.000892583	0.00081918	0.000817766	0.000873863	0.000851202	0.000864065	0.000766971	0.000817286	0.000908435	0.000852914	0.000833858	0.000873554	0.000819682	0.000806504	0.000831978	0.000865493	0.000882069	0.728747	0.807611	-2.00007
K03732	2.48e-05	3.31e-05	3.19e-05	2.13e-05	2.28e-05	2.57e-05	4e-05	2.18e-05	4.74e-05	2.81e-05	3.45e-05	3.4e-05	9.34e-06	3.64e-05	1.63e-05	3.78e-05	2.88e-05	2.96e-05	0.728528	0.80755	0.290247
K12371	0	0	0	0	0	0	3.34e-06	0	0	0	0	5.67e-06	0	0	0	0	0	0	0.727909	0.807048	-0.0300634
K15039	0	0	0	0	0	0	3.34e-06	0	0	0	0	5.67e-06	0	0	0	0	0	0	0.727909	0.807048	-0.0300634
K01448	0.00191926	0.00194715	0.0018113	0.00186979	0.00195254	0.00214298	0.0018082	0.00188751	0.00183889	0.00187306	0.00204601	0.00179251	0.00202739	0.00177901	0.00219956	0.00177111	0.00204353	0.0018411	0.727896	0.807048	-1.37302
K05592	0.000411625	0.000380174	0.000436896	0.000396105	0.000423278	0.000423462	0.000393667	0.000456919	0.000397697	0.000360565	0.000438782	0.000357368	0.000453127	0.000473594	0.000492864	0.000415989	0.00039428	0.000390715	0.727338	0.806962	-1.01878
K01625	0.000719103	0.000697537	0.000741813	0.000817766	0.000646295	0.000718603	0.000740627	0.000745213	0.000747962	0.000693033	0.00069515	0.000697718	0.00076144	0.000716463	0.000794284	0.000756344	0.000721244	0.000674872	0.726931	0.806694	1.59222
K02171	0.000168617	0.00015207	0.000163836	0.000170368	0.000159298	0.000205315	0.000143455	0.000184943	0.000142295	0.000182624	0.000138044	0.000147485	0.000158828	0.000157865	0.000183296	0.000157572	0.000182715	0.000153918	0.726617	0.806528	0.832359
K07788	0	3.31e-06	0	0	0	0	0	5.44e-06	0	0	0	0	0	6.07e-06	0	6.3e-06	0	0	0.726014	0.806042	-0.0460162
K07789	0	3.31e-06	0	0	0	0	0	5.44e-06	0	0	0	0	0	6.07e-06	0	6.3e-06	0	0	0.726014	0.806042	-0.0460162
K03584	0.00113569	0.00107441	0.00103308	0.0010435	0.00109688	0.00110785	0.000977494	0.000941036	0.000992418	0.00113788	0.00108956	0.00101538	0.00112114	0.000971475	0.00101831	0.00102106	0.00100493	0.00111887	0.724603	0.804841	-1.56515
K19091	4.96e-05	4.63e-05	3.19e-05	5.11e-05	7.74e-05	7.27e-05	3.67e-05	4.9e-05	4.38e-05	3.75e-05	4.44e-05	4.54e-05	6.07e-05	6.07e-05	6.52e-05	5.04e-05	3.85e-05	3.55e-05	0.724243	0.804623	0.354878
K00076	1.49e-05	3.31e-06	9.1e-06	4.26e-06	4.55e-06	4.28e-06	3.34e-06	2.72e-05	0	9.37e-06	4.93e-06	5.67e-06	9.34e-06	1.21e-05	1.63e-05	1.26e-05	4.81e-06	5.92e-06	0.722783	0.803184	-0.121608
K15023	8.93e-05	6.94e-05	9.56e-05	0.000110739	6.37e-05	8.55e-05	7.34e-05	7.07e-05	8.03e-05	7.49e-05	8.87e-05	7.37e-05	7.01e-05	9.71e-05	9.37e-05	9.45e-05	0.000110591	5.92e-05	0.722539	0.803094	-0.509549
K12528	0	6.61e-06	4.55e-06	0	4.55e-06	0	6.67e-06	0	1.09e-05	4.68e-06	4.93e-06	5.67e-06	0	0	0	0	0	1.18e-05	0.722447	0.803094	0.0788765
K01002	0.000143821	0.000138846	0.000141081	0.000110739	0.000113784	0.000124045	0.000150127	8.16e-05	0.00015689	0.00015921	9.86e-05	7.37e-05	0.000149485	8.5e-05	0.00017515	8.19e-05	0.000163482	0.000124318	0.722366	0.803094	0.367693
K01007	2.98e-05	4.63e-05	3.64e-05	2.13e-05	3.64e-05	2.99e-05	2e-05	3.81e-05	2.19e-05	1.87e-05	2.47e-05	3.4e-05	2.8e-05	4.86e-05	1.63e-05	3.78e-05	1.44e-05	4.14e-05	0.722277	0.803094	0.272413
K00027	0.000406665	0.000462821	0.000391386	0.000438697	0.000423278	0.000461959	0.000470398	0.000456919	0.000470669	0.000430804	0.000478224	0.000459473	0.00042977	0.000382518	0.000496937	0.000397081	0.000471213	0.000491354	0.722138	0.803094	-1.19324
K10237	0	3.31e-06	0	4.26e-06	9.1e-06	0	0	0	0	0	0	0	0	1.21e-05	4.07e-06	6.3e-06	0	0	0.721749	0.803094	-0.0549603
K08173	0	3.31e-06	0	0	0	0	0	1.09e-05	0	0	4.93e-06	0	4.67e-06	0	0	0	0	0	0.721209	0.802709	0.0422345
K01720	0	3.31e-06	0	0	0	0	3.34e-06	1.09e-05	0	0	0	0	0	1.21e-05	0	1.26e-05	0	0	0.721054	0.802709	-0.0483759
K00041	0.000218211	0.000224799	0.000191142	0.000229997	0.000195709	0.000183928	0.000223523	0.000288294	0.000229862	0.000201354	0.000192275	0.00024959	0.000247585	0.000206438	0.000289201	0.00017648	0.000201948	0.000165758	0.721046	0.802709	0.584684
K03055	4.96e-06	1.32e-05	4.55e-06	4.26e-06	4.55e-06	8.55e-06	1.33e-05	1.09e-05	1.09e-05	4.68e-06	9.86e-06	1.13e-05	4.67e-06	1.21e-05	4.07e-06	1.26e-05	4.81e-06	1.78e-05	0.720815	0.802709	-0.191681
K00043	0	0	0	0	0	0	0	0	3.65e-06	0	0	0	0	0	0	6.3e-06	0	0	0.720651	0.802709	-0.0308312
K15898	9.92e-06	3.64e-05	2.73e-05	2.13e-05	2.73e-05	2.99e-05	3e-05	3.81e-05	2.92e-05	2.34e-05	3.45e-05	2.27e-05	9.34e-06	3.04e-05	6.11e-05	3.15e-05	1.92e-05	3.55e-05	0.719803	0.802057	-0.234499
K09710	0.00106626	0.00108432	0.000996669	0.0010861	0.0010104	0.00103085	0.00105423	0.00107158	0.00111282	0.00109106	0.00105505	0.00100403	0.00110713	0.000941116	0.00103461	0.00101476	0.00113476	0.00105375	0.718432	0.800712	2.05486
K04485	0.000803412	0.000743819	0.000787323	0.000787952	0.000819247	0.000859757	0.000737291	0.000805048	0.000744314	0.000753908	0.000744451	0.000720408	0.000780126	0.000795395	0.00083909	0.000762647	0.000841451	0.00078735	0.718239	0.800678	1.86268
K04031	0.000252926	0.000214881	0.000222999	0.000191664	0.000159298	0.000183928	0.000123438	0.000261097	0.000138647	0.00021072	0.000182415	0.000141813	0.000210214	9.71e-05	0.000281054	0.000100846	0.000288498	0.000142078	0.718113	0.800678	0.302516
K21030	4.96e-05	8.6e-05	6.37e-05	8.52e-05	9.56e-05	8.98e-05	0.000100085	6.53e-05	0.000102161	7.49e-05	0.000103533	8.51e-05	6.07e-05	5.46e-05	0.000101831	6.3e-05	7.69e-05	8.88e-05	0.716558	0.799168	0.43605
K13530	1.49e-05	6.61e-06	4.55e-06	8.52e-06	4.55e-06	0	1e-05	0	1.46e-05	4.68e-06	4.93e-06	5.67e-06	4.67e-06	6.07e-06	4.07e-06	6.3e-06	1.44e-05	5.92e-06	0.716208	0.79896	0.14558
K08299	0	3.31e-06	0	0	0	0	0	0	3.65e-06	0	0	0	0	0	4.07e-06	0	0	5.92e-06	0.715796	0.798683	-0.0476108
K03660	0.000431462	0.000482656	0.000368631	0.000408883	0.000486997	0.000444849	0.000397003	0.000353568	0.000401346	0.000454218	0.000448643	0.0004538	0.00039707	0.000455379	0.000334007	0.000441201	0.000375047	0.000491354	0.715075	0.79806	-0.866243
K03634	1.98e-05	2.31e-05	3.19e-05	1.28e-05	1.37e-05	1.28e-05	1.67e-05	1.63e-05	2.55e-05	3.28e-05	9.86e-06	1.13e-05	1.87e-05	3.04e-05	2.04e-05	2.52e-05	2.4e-05	1.18e-05	0.714819	0.797956	-0.258071
K01677	0.000337235	0.000370257	0.000345876	0.000391846	0.000377764	0.000397798	0.00039033	0.000402524	0.00044148	0.000374613	0.000409202	0.000402748	0.000406413	0.000333945	0.000517303	0.000321446	0.000427938	0.000337436	0.714805	0.797956	-0.788728
K07103	4.96e-06	9.92e-06	9.1e-06	4.26e-06	4.55e-06	4.28e-06	1.33e-05	1.09e-05	1.82e-05	4.68e-06	9.86e-06	1.7e-05	4.67e-06	1.82e-05	4.07e-06	1.26e-05	4.81e-06	1.18e-05	0.714357	0.797804	-0.174907
K11743	0	6.61e-06	4.55e-06	4.26e-06	4.55e-06	0	6.67e-06	1.09e-05	3.65e-06	9.37e-06	0	0	0	6.07e-06	4.07e-06	1.26e-05	9.62e-06	5.92e-06	0.714048	0.797642	-0.118549
K20608	0	3.31e-06	0	4.26e-06	4.55e-06	0	3.34e-06	0	3.65e-06	4.68e-06	0	0	0	0	0	0	4.81e-06	5.92e-06	0.713954	0.797642	0.0804806
K03076	0.00104146	0.00106449	0.000973914	0.00102221	0.00104681	0.00105224	0.00104755	0.00101175	0.00101796	0.00104892	0.00105012	0.000998361	0.00105574	0.00100183	0.000965361	0.000995853	0.00100493	0.00110111	0.713539	0.797437	2.85021
K21393	0	3.31e-06	4.55e-06	4.26e-06	0	4.28e-06	6.67e-06	5.44e-06	3.65e-06	4.68e-06	0	0	4.67e-06	0	8.15e-06	0	9.62e-06	0	0.713436	0.797437	0.101844
K02573	4.96e-06	6.61e-06	9.1e-06	8.52e-06	9.1e-06	4.28e-06	1.33e-05	5.44e-06	1.82e-05	2.81e-05	0	0	9.34e-06	6.07e-06	8.15e-06	1.89e-05	1.44e-05	5.92e-06	0.713419	0.797437	-0.129777
K03470	0.00114561	0.00115375	0.0011332	0.00112443	0.0011606	0.00114634	0.00113763	0.00104439	0.00115296	0.00112852	0.00119309	0.00117421	0.00115851	0.00115363	0.00103461	0.0011093	0.00112514	0.0011899	0.712741	0.797091	-2.6184
K21584	0	0	4.55e-06	4.26e-06	0	0	6.67e-06	0	3.65e-06	4.68e-06	0	5.67e-06	4.67e-06	0	0	0	0	0	0.712608	0.797091	0.0723797
K01912	0.000441381	0.000561996	0.000459651	0.000468512	0.000377764	0.000479069	0.000527113	0.000538512	0.000536344	0.00044017	0.000502874	0.000561578	0.000387727	0.000546455	0.000476571	0.000504229	0.000389472	0.000485434	0.712297	0.796959	0.791222
K13931	0	3.31e-06	0	4.26e-06	4.55e-06	4.28e-06	3.34e-06	5.44e-06	3.65e-06	0	0	5.67e-06	0	1.21e-05	0	1.26e-05	4.81e-06	0	0.711455	0.796199	-0.0885456
K00789	0.00122	0.00122317	0.00119691	0.00123943	0.00126983	0.00127039	0.00130777	0.00114774	0.00124417	0.00125495	0.00127691	0.00123661	0.00115851	0.00117791	0.00111607	0.00126688	0.00127901	0.00126686	0.711134	0.796021	2.27585
K01929	0.000947233	0.0010149	0.000978465	0.00100517	0.00104226	0.000962415	0.000957477	0.000886641	0.000901203	0.0010255	0.00100082	0.000896256	0.00099034	0.000922901	0.000957215	0.000983247	0.000971275	0.00102415	0.710942	0.795989	-2.02817
K00948	0.00107617	0.00106118	0.00108314	0.0010648	0.00111053	0.00110357	0.00116098	0.00109334	0.00110917	0.00104423	0.000981098	0.00110614	0.00116785	0.00102612	0.00119346	0.000983247	0.00122131	0.00103007	0.710283	0.795432	1.58886
K07728	9.92e-06	1.32e-05	4.55e-06	4.26e-06	4.55e-06	8.55e-06	1.33e-05	1.09e-05	1.09e-05	4.68e-06	9.86e-06	1.7e-05	4.67e-06	1.21e-05	4.07e-06	1.26e-05	4.81e-06	1.78e-05	0.710149	0.795432	-0.199356
K21993	0.000396747	0.000393398	0.00040959	0.000464253	0.000409623	0.000397798	0.000433701	0.00045148	0.000426886	0.000379295	0.000384551	0.000436783	0.000415756	0.000382518	0.000448058	0.000397081	0.000461596	0.000432155	0.707909	0.793137	1.48352
K06988	9.92e-06	6.61e-06	9.1e-06	0	4.55e-06	0	1.33e-05	1.09e-05	3.65e-06	4.68e-06	0	1.13e-05	4.67e-06	6.07e-06	0	0	4.81e-06	1.78e-05	0.706654	0.791912	0.112193
K03596	0.000917477	0.000866136	0.000882894	0.000873136	0.000919377	0.000846925	0.000780661	0.000810487	0.000813637	0.000861609	0.000847984	0.000850876	0.000906254	0.000837897	0.000835017	0.00090131	0.000802985	0.000941268	0.705704	0.791029	-1.90462
K02598	2.98e-05	3.31e-05	2.73e-05	3.83e-05	3.19e-05	4.28e-05	1.67e-05	5.44e-05	1.09e-05	2.81e-05	2.47e-05	2.84e-05	4.67e-05	4.25e-05	5.3e-05	3.78e-05	4.81e-05	0	0.705181	0.790623	-0.226631
K09858	3.97e-05	3.64e-05	5.46e-05	3.83e-05	3.19e-05	2.57e-05	4e-05	4.9e-05	4.38e-05	4.21e-05	3.94e-05	3.97e-05	2.8e-05	5.46e-05	2.44e-05	5.67e-05	3.37e-05	2.37e-05	0.704979	0.790578	0.377539
K17686	0.000213251	0.000300833	0.00022755	0.000255552	0.000245774	0.000269476	0.000266893	0.000168625	0.00023351	0.000280959	0.000211996	0.000266608	0.000205542	0.00024894	0.000248468	0.000258417	0.00022599	0.000290076	0.704729	0.790478	-0.733335
K04082	4.96e-06	6.61e-06	4.55e-06	1.28e-05	1.37e-05	8.55e-06	3.34e-06	5.44e-06	3.65e-06	4.68e-06	4.93e-06	0	9.34e-06	1.21e-05	8.15e-06	1.26e-05	4.81e-06	0	0.704033	0.789879	0.159285
K13665	4.96e-06	3.31e-06	0	8.52e-06	4.55e-06	0	0	5.44e-06	3.65e-06	0	0	0	4.67e-06	6.07e-06	8.15e-06	6.3e-06	0	0	0.704009	0.789879	0.0983292
K00384	0.00119024	0.0012397	0.00110589	0.00112017	0.00114695	0.0011164	0.00126107	0.00105526	0.0011712	0.00117535	0.00127198	0.00115152	0.00113515	0.00113541	0.00110385	0.0010967	0.00105302	0.00117807	0.702592	0.788623	1.83062
K03817	1.49e-05	9.92e-06	2.28e-05	4.26e-06	0	8.55e-06	3.34e-06	5.44e-06	1.09e-05	0	1.48e-05	5.67e-06	1.4e-05	2.43e-05	4.07e-06	1.89e-05	4.81e-06	5.92e-06	0.702429	0.788622	-0.130794
K00023	0	6.61e-06	1.37e-05	4.26e-06	4.55e-06	4.28e-06	6.67e-06	5.44e-06	7.3e-06	1.4e-05	0	5.67e-06	0	6.07e-06	4.07e-06	6.3e-06	1.92e-05	5.92e-06	0.701709	0.787994	-0.127513
K02992	0.00118032	0.00115044	0.00111955	0.00117128	0.00117881	0.00123617	0.00115097	0.00104439	0.00120769	0.00122686	0.00116844	0.00112316	0.00112114	0.00122649	0.00106312	0.00114082	0.00104821	0.00121951	0.701574	0.787994	1.92201
K06287	0.00111585	0.00103804	0.00107404	0.0010861	0.00100585	0.00110357	0.00115431	0.00103895	0.00109823	0.0011332	0.00108956	0.0011345	0.00113982	0.00100183	0.00103053	0.00102106	0.00112995	0.00111887	0.701274	0.787867	-2.18329
K04772	9.92e-06	6.61e-06	2.28e-05	1.28e-05	1.82e-05	1.71e-05	6.67e-06	1.63e-05	1.09e-05	1.4e-05	4.93e-06	5.67e-06	2.34e-05	6.07e-06	2.85e-05	6.3e-06	1.44e-05	5.92e-06	0.700518	0.787198	0.180691
K01771	3.47e-05	2.64e-05	2.28e-05	2.98e-05	2.28e-05	2.57e-05	1.67e-05	2.72e-05	2.19e-05	1.4e-05	2.96e-05	2.84e-05	3.74e-05	2.43e-05	2.44e-05	2.52e-05	9.62e-06	2.37e-05	0.70047	0.787198	0.37104
K04568	1.98e-05	4.3e-05	2.28e-05	2.98e-05	2.73e-05	1.28e-05	5.67e-05	1.63e-05	4.74e-05	2.81e-05	2.96e-05	3.97e-05	9.34e-06	3.64e-05	8.15e-06	3.78e-05	2.88e-05	3.55e-05	0.700298	0.787198	0.22357
K19174	9.92e-06	1.32e-05	9.1e-06	1.28e-05	9.1e-06	1.28e-05	1.33e-05	1.09e-05	7.3e-06	9.37e-06	0	1.7e-05	1.4e-05	1.82e-05	1.22e-05	1.89e-05	4.81e-06	1.18e-05	0.699713	0.786836	-0.248635
K15974	0	3.31e-06	4.55e-06	8.52e-06	4.55e-06	8.55e-06	3.34e-06	5.44e-06	0	0	4.93e-06	1.13e-05	0	6.07e-06	4.07e-06	1.26e-05	0	5.92e-06	0.69865	0.785821	-0.120622
K18284	0	6.61e-06	1.37e-05	1.28e-05	1.37e-05	4.28e-06	6.67e-06	1.63e-05	1.09e-05	9.37e-06	4.93e-06	0	4.67e-06	1.21e-05	1.22e-05	1.26e-05	1.92e-05	0	0.698403	0.785724	0.155893
K07451	0.000243007	0.00024794	0.000195693	0.000242774	0.000286736	0.000235257	0.000223523	0.000212141	0.000240807	0.000215402	0.000236647	0.000283625	0.000200871	0.000285371	0.000211809	0.0002206	0.000250031	0.000272317	0.698196	0.785671	-0.851137
K07650	3.97e-05	4.3e-05	3.64e-05	4.26e-05	4.1e-05	3.85e-05	2.34e-05	3.81e-05	2.55e-05	4.68e-05	1.48e-05	5.67e-05	4.67e-05	3.64e-05	2.44e-05	5.04e-05	2.88e-05	4.14e-05	0.697938	0.785561	-0.35826
K22349	2.98e-05	3.31e-06	1.82e-05	2.56e-05	2.28e-05	3.42e-05	3.34e-06	5.44e-06	0	0	0	1.13e-05	1.87e-05	1.21e-05	5.7e-05	1.26e-05	4.81e-06	0	0.697884	0.785561	0.0957311
K10004	4.96e-06	3.31e-06	4.55e-06	4.26e-06	4.55e-06	8.55e-06	6.67e-06	5.44e-06	3.65e-06	0	0	0	4.67e-06	1.82e-05	4.07e-06	2.52e-05	4.81e-06	0	0.697632	0.785561	-0.090517
K02667	0	0	9.1e-06	0	0	0	3.34e-06	0	3.65e-06	4.68e-06	0	5.67e-06	0	0	0	0	4.81e-06	5.92e-06	0.697579	0.785561	-0.0721766
K13010	9.92e-06	1.32e-05	2.28e-05	8.52e-06	4.55e-06	1.28e-05	1e-05	1.09e-05	1.09e-05	9.37e-06	4.93e-06	1.7e-05	9.34e-06	1.82e-05	1.22e-05	1.89e-05	4.81e-06	1.78e-05	0.696691	0.78488	-0.235178
K08724	4.96e-05	3.97e-05	5.01e-05	2.98e-05	5.01e-05	3.42e-05	3e-05	2.72e-05	4.38e-05	5.15e-05	3.94e-05	5.67e-05	4.67e-05	4.25e-05	2.04e-05	4.41e-05	2.4e-05	4.74e-05	0.696396	0.784728	-0.390334
K21977	0	9.92e-06	9.1e-06	4.26e-06	1.37e-05	4.28e-06	6.67e-06	0	3.65e-06	9.37e-06	4.93e-06	5.67e-06	4.67e-06	6.07e-06	0	6.3e-06	9.62e-06	1.18e-05	0.69551	0.78391	-0.157851
K07140	0	3.31e-06	0	0	0	0	0	0	0	0	0	0	0	6.07e-06	0	0	0	0	0.695024	0.783542	-0.0335159
K22310	0	3.31e-06	0	0	0	0	0	0	0	0	0	0	0	6.07e-06	0	0	0	0	0.695024	0.783542	-0.0335159
K00001	0.000193414	0.000128929	0.000113775	0.000102221	0.00013199	0.000162541	0.000123438	0.000141427	0.000142295	0.00014048	0.000103533	0.000141813	0.000135471	0.000133578	0.00017515	0.00013236	0.000158674	0.000159838	0.694516	0.783331	-0.610459
K09003	1.98e-05	1.32e-05	2.28e-05	1.7e-05	1.82e-05	1.28e-05	2.67e-05	1.63e-05	2.19e-05	2.81e-05	1.97e-05	1.7e-05	9.34e-06	3.64e-05	1.22e-05	3.15e-05	9.62e-06	1.78e-05	0.693786	0.782688	-0.268877
K21469	9.92e-06	3.31e-06	4.55e-06	0	0	8.55e-06	3.34e-06	5.44e-06	3.65e-06	4.68e-06	0	0	9.34e-06	0	2.04e-05	0	1.44e-05	0	0.69339	0.782421	-0.0868214
K14127	4.96e-06	1.32e-05	1.37e-05	4.26e-06	4.55e-06	4.28e-06	1.33e-05	1.09e-05	1.46e-05	9.37e-06	9.86e-06	1.13e-05	9.34e-06	1.21e-05	4.07e-06	1.26e-05	4.81e-06	1.78e-05	0.693144	0.782324	-0.233091
K00088	0.000719103	0.000687619	0.000664446	0.000711286	0.000678154	0.000714325	0.000637206	0.00077785	0.000671342	0.00068835	0.000675429	0.00065801	0.000752097	0.000667889	0.000786138	0.000649195	0.00081741	0.000657112	0.692932	0.782266	-1.39737
K06994	9.92e-06	1.32e-05	9.1e-06	8.52e-06	9.1e-06	8.55e-06	1.33e-05	2.72e-05	1.46e-05	9.37e-06	1.48e-05	1.7e-05	9.34e-06	2.43e-05	8.15e-06	1.89e-05	9.62e-06	1.18e-05	0.691863	0.781238	-0.243718
K22306	9.92e-06	3.31e-06	9.1e-06	4.26e-06	4.55e-06	0	1e-05	5.44e-06	1.09e-05	4.68e-06	4.93e-06	1.13e-05	4.67e-06	6.07e-06	4.07e-06	6.3e-06	4.81e-06	1.78e-05	0.690811	0.78023	-0.173338
K11738	9.92e-06	0	0	0	0	4.28e-06	0	0	7.3e-06	4.68e-06	0	5.67e-06	0	0	0	6.3e-06	4.81e-06	5.92e-06	0.690775	0.78023	-0.0843936
K07696	0	3.31e-06	4.55e-06	0	0	0	0	0	0	0	4.93e-06	0	0	0	0	0	0	0	0.690448	0.780181	0.044414
K13927	3.97e-05	6.28e-05	5.46e-05	7.67e-05	2.73e-05	4.28e-05	7.01e-05	4.35e-05	7.66e-05	7.49e-05	6.41e-05	5.67e-05	6.07e-05	3.64e-05	4.48e-05	4.41e-05	5.77e-05	8.29e-05	0.690337	0.780181	-0.366995
K09744	0	0	9.1e-06	0	0	0	3.34e-06	0	3.65e-06	4.68e-06	0	5.67e-06	0	6.07e-06	0	0	4.81e-06	0	0.690127	0.780179	-0.0740355
K07105	0.000247967	0.000297528	0.000286713	0.000315181	0.00023212	0.00029514	0.000270229	0.000261097	0.000288239	0.000285642	0.000226786	0.000209883	0.000350356	0.000151793	0.000395106	0.00017648	0.000326964	0.000266397	0.690067	0.780179	0.475323
K11895	4.96e-06	6.61e-06	9.1e-06	4.26e-06	0	8.55e-06	0	0	0	4.68e-06	0	0	0	6.07e-06	4.07e-06	0	0	1.18e-05	0.690036	0.780179	0.0893884
K20511	0	3.31e-06	0	4.26e-06	4.55e-06	4.28e-06	3.34e-06	0	3.65e-06	0	4.93e-06	5.67e-06	0	6.07e-06	0	6.3e-06	4.81e-06	0	0.687653	0.77792	-0.120855
K02967	0.00100179	0.00105457	0.00105583	0.00105202	0.00104681	0.00101374	0.000994175	0.000962794	0.00107634	0.00105828	0.00104519	0.000992688	0.0010137	0.00103219	0.000936848	0.00108409	0.000952042	0.00106559	0.687521	0.77792	2.47047
K16013	0	0	0	0	0	8.55e-06	6.67e-06	1.09e-05	7.3e-06	0	0	5.67e-06	4.67e-06	6.07e-06	4.07e-06	6.3e-06	0	0	0.687132	0.777691	0.0943324
K03073	0.000659591	0.000591749	0.000632589	0.000651657	0.000591678	0.000615945	0.000660559	0.000620104	0.000653099	0.000632159	0.000621198	0.000572923	0.000696041	0.000613244	0.000712819	0.000605075	0.000653928	0.000633432	0.687063	0.777691	-1.86153
K02806	0.000114065	8.6e-05	0.000122877	5.96e-05	7.28e-05	5.99e-05	0.000126774	7.62e-05	0.000120404	6.56e-05	0.000108463	7.94e-05	6.07e-05	0.00013965	4.07e-05	0.000151269	5.77e-05	7.7e-05	0.687055	0.777691	0.289916
K00132	0	3.31e-06	4.55e-06	4.26e-06	0	0	0	0	0	9.37e-06	0	0	0	0	8.15e-06	0	0	0	0.686673	0.777691	-0.057287
K00528	0.000738941	0.000753736	0.00068265	0.000707027	0.000700911	0.000718603	0.000690585	0.000734334	0.000711476	0.000711764	0.00070501	0.000646665	0.000724069	0.000722535	0.000737259	0.000611378	0.000841451	0.000651192	0.686663	0.777691	1.53545
K02040	0.000867883	0.000800019	0.000814629	0.000787952	0.000842004	0.000893976	0.000810686	0.00089752	0.000722422	0.000913118	0.000823333	0.000765788	0.00089224	0.000765037	0.000900189	0.000800464	0.000884726	0.00079327	0.686522	0.777691	-1.54791
K05367	3.97e-05	3.64e-05	5.46e-05	3.41e-05	4.55e-05	2.14e-05	5.34e-05	4.9e-05	3.28e-05	4.21e-05	3.45e-05	4.54e-05	3.27e-05	5.46e-05	3.26e-05	5.04e-05	3.85e-05	5.33e-05	0.686085	0.777585	-0.457501
K16203	4.96e-05	0.000119011	8.19e-05	0.000140554	6.37e-05	4.71e-05	0.000100085	8.16e-05	0.000116755	9.37e-05	9.86e-05	8.51e-05	7.94e-05	0.000109291	6.52e-05	0.000100846	0.000105782	0.000106559	0.685906	0.777561	-0.39062
K16153	9.92e-06	1.65e-05	9.1e-06	1.7e-05	1.82e-05	1.71e-05	1e-05	5.44e-06	1.09e-05	1.4e-05	9.86e-06	1.13e-05	2.34e-05	6.07e-06	2.04e-05	6.3e-06	1.44e-05	1.78e-05	0.68469	0.776363	-0.268287
K03324	0.0010117	0.00101159	0.00105128	0.0010861	0.00106502	0.00100519	0.00100752	0.0011423	0.0010362	0.00103018	0.000917006	0.000930291	0.0011772	0.000959332	0.00120568	0.000876098	0.00122131	0.000917589	0.682363	0.773903	1.09945
K03230	4.96e-06	9.92e-06	4.55e-06	8.52e-06	9.1e-06	0	6.67e-06	1.09e-05	3.65e-06	4.68e-06	9.86e-06	5.67e-06	4.67e-06	1.21e-05	4.07e-06	1.26e-05	4.81e-06	5.92e-06	0.682296	0.773903	-0.215708
K20974	4.96e-06	0	0	1.28e-05	4.55e-06	1.71e-05	3.34e-06	5.44e-06	7.3e-06	4.68e-06	4.93e-06	1.13e-05	9.34e-06	6.07e-06	0	0	4.81e-06	5.92e-06	0.682025	0.773879	0.130788
K02586	3.97e-05	1.32e-05	2.73e-05	3.83e-05	6.37e-05	2.99e-05	4e-05	2.72e-05	1.82e-05	1.87e-05	2.47e-05	4.54e-05	2.34e-05	3.64e-05	6.52e-05	5.04e-05	1.92e-05	4.14e-05	0.681711	0.773702	-0.245899
K20492	4.96e-06	6.61e-06	1.37e-05	1.28e-05	9.1e-06	1.28e-05	6.67e-06	2.72e-05	7.3e-06	9.37e-06	4.93e-06	1.7e-05	1.87e-05	1.21e-05	8.15e-06	1.26e-05	2.4e-05	5.92e-06	0.681464	0.773601	-0.198737
K22319	4.96e-06	9.92e-06	0	4.26e-06	4.55e-06	0	3.34e-06	5.44e-06	0	0	9.86e-06	5.67e-06	4.67e-06	6.07e-06	0	6.3e-06	0	5.92e-06	0.680887	0.773125	-0.127849
K02996	0.00117536	0.00124631	0.00116506	0.00120535	0.00125163	0.00126611	0.00121102	0.00109878	0.00126971	0.00125027	0.00121774	0.00124228	0.00117252	0.00114148	0.00108756	0.0013236	0.00121169	0.00137342	0.680285	0.772621	-1.81798
K15770	0.000243007	0.000264469	0.000300366	0.000302403	0.000318596	0.000273753	0.000306927	0.000250218	0.000277293	0.000234133	0.000285948	0.000283625	0.000312985	0.000200367	0.00036252	0.000182783	0.000346197	0.000242717	0.678738	0.771043	0.639887
K15372	9.92e-06	9.92e-06	1.37e-05	3.83e-05	3.64e-05	2.99e-05	2e-05	2.18e-05	2.19e-05	1.87e-05	1.48e-05	1.13e-05	3.27e-05	3.04e-05	2.44e-05	2.52e-05	9.62e-06	1.78e-05	0.67862	0.771043	0.25165
K07287	4.96e-06	3.31e-06	9.1e-06	4.26e-06	4.55e-06	4.28e-06	3.34e-06	1.09e-05	3.65e-06	0	4.93e-06	0	9.34e-06	6.07e-06	4.07e-06	1.26e-05	4.81e-06	0	0.67776	0.770289	0.15288
K20530	1.98e-05	1.65e-05	4.55e-05	1.7e-05	2.28e-05	2.99e-05	2.34e-05	2.72e-05	1.82e-05	1.87e-05	2.96e-05	2.27e-05	9.34e-06	4.25e-05	1.63e-05	3.15e-05	1.44e-05	1.78e-05	0.677358	0.770011	0.269019
K03809	9.92e-06	1.65e-05	2.28e-05	8.52e-06	9.1e-06	1.28e-05	3e-05	3.26e-05	2.92e-05	2.34e-05	1.97e-05	2.27e-05	9.34e-06	2.43e-05	8.15e-06	4.41e-05	1.44e-05	2.37e-05	0.67732	0.770011	-0.218574
K02939	0.00128943	0.00133226	0.00124242	0.00129054	0.00130624	0.00129177	0.00122437	0.00113686	0.00126241	0.00128305	0.0012917	0.00118555	0.00132668	0.00129935	0.00113236	0.00124797	0.0012165	0.00128462	0.677107	0.770011	2.31987
K18866	5.46e-05	6.61e-05	5.46e-05	5.11e-05	5.92e-05	5.56e-05	7.34e-05	9.25e-05	6.2e-05	6.09e-05	8.87e-05	6.81e-05	5.61e-05	5.46e-05	4.07e-05	7.56e-05	7.21e-05	7.7e-05	0.67661	0.769697	-0.525181
K01303	4.96e-06	9.92e-06	0	4.26e-06	0	4.28e-06	6.67e-06	5.44e-06	1.09e-05	4.68e-06	0	0	1.4e-05	6.07e-06	4.07e-06	0	9.62e-06	0	0.675695	0.768835	0.119195
K08969	4.96e-06	0	0	0	4.55e-06	0	3.34e-06	0	3.65e-06	4.68e-06	0	5.67e-06	0	0	0	0	4.81e-06	5.92e-06	0.67526	0.768519	-0.0923356
K06901	0.000466177	0.000542161	0.000473304	0.000459993	0.000473343	0.00042774	0.000483743	0.000505875	0.000503506	0.00052914	0.000404271	0.000538888	0.000579255	0.000382518	0.000598768	0.000365566	0.000524104	0.000532793	0.674589	0.767934	-0.831739
K20276	0.000109105	4.63e-05	5.92e-05	5.54e-05	6.37e-05	4.28e-05	6.01e-05	5.98e-05	5.84e-05	4.68e-05	7.89e-05	4.54e-05	3.74e-05	9.11e-05	4.48e-05	7.56e-05	5.29e-05	4.74e-05	0.674206	0.767676	0.353033
K00554	0.00114065	0.00115375	0.00110589	0.00106054	0.00111964	0.0010779	0.00106757	0.00101719	0.00113471	0.0011332	0.00118323	0.0010721	0.00117252	0.00109898	0.00101831	0.0010904	0.0010434	0.00116031	0.673344	0.766873	-2.39027
K14118	0	6.61e-06	4.55e-06	0	0	0	6.67e-06	0	3.65e-06	4.68e-06	0	5.67e-06	0	0	0	0	0	5.92e-06	0.673087	0.766758	0.0826931
K14188	4.96e-06	1.98e-05	9.1e-06	2.13e-05	9.1e-06	2.14e-05	1e-05	1.63e-05	1.46e-05	1.87e-05	9.86e-06	2.27e-05	9.34e-06	1.82e-05	1.22e-05	2.52e-05	9.62e-06	1.18e-05	0.672138	0.765855	-0.27428
K10679	4.96e-06	3.31e-06	4.55e-06	4.26e-06	0	4.28e-06	0	0	0	4.68e-06	4.93e-06	5.67e-06	0	0	0	0	4.81e-06	5.92e-06	0.672123	0.765855	-0.116988
K02313	0.00104146	0.00105126	0.00105128	0.00107758	0.00110598	0.00106507	0.00102754	0.000989991	0.00101066	0.00109574	0.00103533	0.0010324	0.00105574	0.00098969	0.000989801	0.00102106	0.00102417	0.00110703	0.672039	0.765855	3.08687
K00282	0.000183495	0.000178517	0.000154734	0.000132035	0.000141093	0.000132599	0.000190161	0.000184943	0.000171484	0.000177941	0.000187345	0.00015883	0.000168171	0.000194295	0.000118124	0.000170177	0.000158674	0.000177598	0.668987	0.762798	-0.829567
K16238	4.96e-06	6.61e-06	9.1e-06	0	0	4.28e-06	3.34e-06	0	3.65e-06	0	0	1.13e-05	9.34e-06	0	4.07e-06	0	0	0	0.668515	0.762438	0.0920857
K02986	0.00122496	0.00120995	0.00116051	0.00117128	0.00119246	0.00116345	0.00116098	0.00109878	0.00115661	0.00116598	0.00119802	0.0011345	0.00119588	0.00119613	0.00102646	0.00122276	0.00106263	0.00123135	0.668176	0.762229	2.34685
K03819	0	0	0	0	0	4.28e-06	0	0	3.65e-06	0	0	0	0	0	0	0	4.81e-06	0	0.66764	0.761795	0.0482577
K05362	0	6.61e-06	4.55e-06	0	4.55e-06	8.55e-06	0	0	0	0	4.93e-06	5.67e-06	9.34e-06	0	0	0	4.81e-06	5.92e-06	0.667065	0.761316	-0.101646
K10775	4.96e-06	3.31e-06	4.55e-06	4.26e-06	9.1e-06	4.28e-06	1.33e-05	5.44e-06	7.3e-06	4.68e-06	9.86e-06	0	4.67e-06	1.82e-05	4.07e-06	1.26e-05	4.81e-06	5.92e-06	0.66706	0.761316	-0.173161
K06139	0	1.98e-05	4.55e-06	8.52e-06	0	4.28e-06	1e-05	5.44e-06	1.09e-05	4.68e-06	0	1.13e-05	9.34e-06	6.07e-06	4.07e-06	6.3e-06	0	1.18e-05	0.666463	0.760984	0.140353
K04567	0.000937314	0.000866136	0.000778221	0.000817766	0.000914826	0.00085548	0.000857393	0.000766971	0.000842826	0.000847561	0.000843054	0.000850876	0.000878226	0.000874328	0.00086353	0.000819372	0.000851068	0.000887989	0.666405	0.760984	-2.31278
K11777	2.98e-05	2.64e-05	1.82e-05	4.26e-06	1.37e-05	3.42e-05	1.67e-05	3.26e-05	2.55e-05	3.28e-05	2.96e-05	5.67e-06	2.8e-05	6.07e-06	3.67e-05	1.26e-05	7.69e-05	5.92e-06	0.664895	0.759547	-0.15923
K03667	0.000203333	0.000251245	0.00018204	0.000191664	0.000177503	0.000132599	0.000236867	0.000141427	0.000226213	0.00021072	0.000266228	0.000232573	0.000163499	0.00021251	0.000109978	0.000245812	0.000120207	0.000278237	0.664628	0.759419	-0.445499
K03589	0.000674469	0.000664478	0.000655344	0.000647398	0.000646295	0.000697216	0.000620525	0.000652742	0.000587424	0.000641524	0.000631058	0.000606958	0.000696041	0.000613244	0.00068838	0.000617681	0.000682778	0.000603833	0.664125	0.759022	2.18202
K03565	0.000937314	0.000938865	0.000832833	0.000864617	0.000901172	0.000859757	0.000904099	0.000832245	0.000886609	0.000931849	0.000936727	0.000941636	0.000882897	0.000850041	0.000896116	0.000869795	0.000855876	0.000864309	0.663612	0.758612	-2.70181
K11695	0	3.31e-06	0	0	0	0	0	0	3.65e-06	4.68e-06	0	0	0	6.07e-06	0	0	0	0	0.663074	0.758175	-0.0568425
K02241	3.47e-05	4.96e-05	3.64e-05	5.54e-05	3.64e-05	5.99e-05	4.67e-05	6.53e-05	3.28e-05	2.34e-05	4.44e-05	5.11e-05	4.2e-05	6.07e-05	3.26e-05	6.93e-05	1.92e-05	4.74e-05	0.662597	0.757807	0.363465
K13678	9.92e-06	9.92e-06	9.1e-06	2.13e-05	2.73e-05	1.71e-05	1e-05	2.18e-05	1.09e-05	9.37e-06	9.86e-06	1.13e-05	1.4e-05	1.82e-05	1.22e-05	2.52e-05	1.92e-05	5.92e-06	0.661701	0.756959	0.266495
K14090	9.92e-06	1.98e-05	2.28e-05	2.13e-05	2.73e-05	1.71e-05	2.67e-05	3.26e-05	3.28e-05	2.34e-05	2.47e-05	2.27e-05	2.8e-05	1.82e-05	3.26e-05	1.89e-05	1.92e-05	3.55e-05	0.66127	0.756643	-0.414097
K00989	0.000188455	0.000175211	0.000213897	0.000187405	0.000145644	0.000158264	0.000206842	0.000146867	0.00020797	0.000163893	0.000162695	0.00018152	0.000140142	0.00021251	0.000101831	0.000233206	0.000149057	0.000219037	0.661253	0.756643	0.589602
K07478	0.00102162	0.0010149	0.000978465	0.000996652	0.00104681	0.000979524	0.000997511	0.000870322	0.00104715	0.000997406	0.00102547	0.000958653	0.00103705	0.000971475	0.00100202	0.00101476	0.000961659	0.00107151	0.661087	0.756643	-2.54604
K09903	0.00106626	0.00105457	0.00106493	0.000988134	0.00100585	0.0010608	0.000977494	0.00102807	0.00106904	0.00102082	0.00112407	0.00106076	0.00106508	0.000983619	0.00102646	0.000964338	0.0010434	0.00111295	0.66103	0.756643	-2.67071
K01902	4.96e-05	4.96e-05	9.1e-05	3.83e-05	3.64e-05	4.71e-05	5e-05	3.26e-05	7.66e-05	4.21e-05	5.42e-05	6.24e-05	3.27e-05	6.07e-05	1.63e-05	7.56e-05	3.85e-05	5.33e-05	0.659625	0.755466	0.318475
K19428	0	9.92e-06	0	4.26e-06	4.55e-06	4.28e-06	3.34e-06	1.09e-05	7.3e-06	4.68e-06	4.93e-06	5.67e-06	0	6.07e-06	0	6.3e-06	4.81e-06	5.92e-06	0.659322	0.755296	0.167385
K05569	0.000123983	0.000115705	0.000113775	0.000140554	9.1e-05	0.000124045	0.000133446	0.000119669	0.000149592	0.000103018	0.000142974	0.00015883	0.000154157	0.000121434	0.000134417	0.00013236	9.62e-05	0.000106559	0.657635	0.75354	-0.745497
K00962	0.000788534	0.000786795	0.000737262	0.000804988	0.000901172	0.000791319	0.000747299	0.000750653	0.000744314	0.000870974	0.000783892	0.000788478	0.000770783	0.000783252	0.000753552	0.000712224	0.000740477	0.000757751	0.65691	0.752886	1.94773
K07455	0.00014878	0.00015207	0.000150183	0.000140554	0.000163849	0.000179651	0.000140119	0.000179504	0.000149592	0.00021072	0.000167625	0.000124795	0.000140142	0.000170008	0.000122198	0.000182783	0.000129824	0.000207197	0.656195	0.752242	-0.712085
K09691	0.000168617	0.000175211	0.000145632	0.000195923	0.000177503	0.000171096	0.000200169	0.000201262	0.000164187	0.000149845	0.000157764	0.00015883	0.000135471	0.000188223	0.00018737	0.000201692	0.000216373	0.000159838	0.656033	0.752233	0.907368
K19449	1.98e-05	6.61e-06	2.73e-05	1.28e-05	1.37e-05	8.55e-06	0	0	0	1.4e-05	4.93e-06	5.67e-06	1.4e-05	1.21e-05	1.22e-05	1.26e-05	9.62e-06	1.78e-05	0.656017	0.752233	-0.172069
K01679	0.000168617	0.000185128	0.000245754	0.000221478	0.000195709	0.000153986	0.000203506	0.000206701	0.000189727	0.000266911	0.000187345	0.0002269	0.000149485	0.000200367	0.000171077	0.000182783	0.00025484	0.000195358	0.655767	0.752233	-0.712123
K13745	9.92e-06	1.32e-05	9.1e-06	8.52e-06	9.1e-06	1.28e-05	1.33e-05	2.18e-05	1.82e-05	1.4e-05	9.86e-06	1.13e-05	9.34e-06	1.21e-05	8.15e-06	1.26e-05	1.92e-05	1.18e-05	0.655454	0.752097	0.376936
K14087	0	0	9.1e-06	8.52e-06	1.37e-05	8.55e-06	1e-05	1.09e-05	1.82e-05	9.37e-06	0	0	1.87e-05	0	1.22e-05	0	1.92e-05	5.92e-06	0.654497	0.751176	0.136397
K08986	4.96e-06	0	4.55e-06	4.26e-06	1.37e-05	4.28e-06	3.34e-06	0	0	4.68e-06	4.93e-06	0	4.67e-06	6.07e-06	4.07e-06	6.3e-06	4.81e-06	5.92e-06	0.653855	0.750614	-0.155026
K02929	4.96e-06	1.32e-05	1.82e-05	4.26e-06	9.1e-06	8.55e-06	1.33e-05	1.09e-05	1.09e-05	9.37e-06	9.86e-06	1.7e-05	4.67e-06	2.43e-05	4.07e-06	1.89e-05	4.81e-06	1.18e-05	0.653375	0.750239	-0.224368
K00783	0.00123983	0.00117358	0.0011423	0.00109461	0.0011606	0.00114207	0.00117099	0.00109878	0.0011712	0.00117066	0.00121774	0.00112316	0.00123792	0.00117184	0.00112014	0.0011093	0.00111552	0.00121951	0.652862	0.749826	-2.94644
K01358	0.00154731	0.00155375	0.00141536	0.00156738	0.00162029	0.00149709	0.00151795	0.00144691	0.00157255	0.0015921	0.00171569	0.00157128	0.00152288	0.00153615	0.00135232	0.0015316	0.00144249	0.00164574	0.651953	0.748958	-2.09927
K18345	0	0	9.1e-06	8.52e-06	9.1e-06	8.55e-06	0	0	7.3e-06	0	0	5.67e-06	0	1.21e-05	4.07e-06	6.3e-06	0	5.92e-06	0.651698	0.748841	0.117538
K12111	1.49e-05	6.61e-06	4.55e-06	8.52e-06	4.55e-06	4.28e-06	1e-05	5.44e-06	7.3e-06	1.4e-05	4.93e-06	0	1.87e-05	0	8.15e-06	0	9.62e-06	0	0.650765	0.747944	0.148432
K03228	4.96e-06	9.92e-06	4.55e-06	8.52e-06	9.1e-06	0	1e-05	5.44e-06	3.65e-06	4.68e-06	1.48e-05	5.67e-06	4.67e-06	6.07e-06	4.07e-06	1.26e-05	4.81e-06	5.92e-06	0.64963	0.746815	-0.220795
K03780	7.44e-05	5.95e-05	4.1e-05	8.09e-05	6.83e-05	6.84e-05	4.67e-05	7.62e-05	5.84e-05	4.21e-05	4.44e-05	6.24e-05	8.88e-05	2.43e-05	8.96e-05	4.41e-05	8.17e-05	5.92e-05	0.64944	0.746772	0.395021
K06045	1.49e-05	1.65e-05	2.73e-05	1.28e-05	1.37e-05	8.55e-06	1.67e-05	2.18e-05	2.19e-05	9.37e-06	1.97e-05	2.27e-05	1.4e-05	2.43e-05	8.15e-06	1.26e-05	1.44e-05	1.78e-05	0.649066	0.746518	0.354142
K10037	0	0	4.55e-06	4.26e-06	0	0	0	5.44e-06	0	0	0	5.67e-06	0	0	4.07e-06	0	0	0	0.649046	0.746518	0.0705627
K16213	7.93e-05	8.93e-05	7.28e-05	0.00010648	0.000113784	0.000128322	9.34e-05	0.000130548	0.000109458	9.83e-05	9.86e-05	0.00013614	9.34e-05	0.000103219	9.78e-05	0.000107149	0.000129824	9.47e-05	0.64885	0.746518	-0.699557
K19123	2.98e-05	2.64e-05	1.37e-05	2.13e-05	4.55e-05	2.14e-05	2e-05	2.72e-05	2.55e-05	2.81e-05	2.47e-05	3.97e-05	4.67e-06	1.21e-05	2.04e-05	1.89e-05	3.85e-05	2.37e-05	0.648389	0.746265	0.293609
K01006	0.000704225	0.000677702	0.00068265	0.000643139	0.000705463	0.000650164	0.000640542	0.000641862	0.000671342	0.000655572	0.00069022	0.000686373	0.000686698	0.000667889	0.000635428	0.000655498	0.000663544	0.000728151	0.648099	0.746106	-3.08422
K01455	4.96e-06	0	4.55e-06	0	0	4.28e-06	3.34e-06	0	3.65e-06	4.68e-06	0	0	4.67e-06	6.07e-06	4.07e-06	6.3e-06	0	0	0.647952	0.746106	-0.124127
K22167	4.96e-06	6.61e-06	4.55e-06	4.26e-06	4.55e-06	4.28e-06	6.67e-06	1.09e-05	3.65e-06	4.68e-06	4.93e-06	5.67e-06	4.67e-06	6.07e-06	4.07e-06	6.3e-06	4.81e-06	5.92e-06	0.6479	0.746106	0.393673
K07261	4.96e-06	3.31e-06	9.1e-06	0	0	4.28e-06	0	5.44e-06	0	4.68e-06	0	5.67e-06	0	0	0	0	4.81e-06	5.92e-06	0.647217	0.745618	0.107506
K18446	9.92e-06	9.92e-06	1.37e-05	8.52e-06	0	8.55e-06	1.33e-05	5.44e-06	1.82e-05	1.4e-05	0	5.67e-06	9.34e-06	0	2.44e-05	0	1.92e-05	0	0.646814	0.745329	0.144142
K05781	0	9.92e-06	4.55e-06	4.26e-06	0	4.28e-06	3.34e-06	5.44e-06	3.65e-06	0	0	1.13e-05	4.67e-06	6.07e-06	8.15e-06	6.3e-06	0	5.92e-06	0.646584	0.745238	-0.150389
K05364	0.000193414	0.000168599	0.000131979	0.000225737	0.000191158	0.00019676	0.000210178	0.000195822	0.000193376	0.00014048	0.000172555	0.000209883	0.000186857	0.000206438	0.000248468	0.000170177	0.000211565	0.000219037	0.645654	0.744342	-0.804594
K00604	0.00128447	0.00115375	0.00119236	0.00114146	0.00114239	0.00118484	0.00116098	0.00107702	0.00118579	0.00118471	0.00120295	0.00120824	0.00116785	0.00123863	0.00109978	0.00116603	0.00105302	0.00108335	0.644675	0.743388	2.40518
K06887	0	0	0	0	0	0	6.67e-06	0	3.65e-06	0	0	0	0	0	0	0	0	5.92e-06	0.643055	0.741695	0.0507607
K16793	0	3.31e-06	4.55e-06	0	0	0	0	0	3.65e-06	0	0	5.67e-06	4.67e-06	0	0	0	0	5.92e-06	0.643055	0.741695	-0.0804038
K09964	0	9.92e-06	1.37e-05	8.52e-06	9.1e-06	8.55e-06	6.67e-06	1.09e-05	7.3e-06	0	1.97e-05	5.67e-06	0	1.82e-05	0	1.26e-05	0	5.92e-06	0.642867	0.741695	0.149787
K04073	0	0	0	0	0	0	3.34e-06	0	3.65e-06	0	0	0	0	0	4.07e-06	0	0	0	0.642102	0.741119	0.052389
K10978	0	3.31e-06	0	0	0	0	6.67e-06	0	7.3e-06	0	0	5.67e-06	0	0	0	0	0	5.92e-06	0.641564	0.740674	0.0704035
K03787	0.000441381	0.000436374	0.000505161	0.000506845	0.000486997	0.000440572	0.00050376	0.000429721	0.000470669	0.000416756	0.000502874	0.000425438	0.000415756	0.000540383	0.000374739	0.000523138	0.000437555	0.000491354	0.641539	0.740674	1.23946
K09516	5.95e-05	2.64e-05	5.92e-05	2.13e-05	3.64e-05	4.71e-05	3.67e-05	4.9e-05	2.92e-05	2.81e-05	5.42e-05	2.84e-05	3.74e-05	4.86e-05	4.07e-05	5.67e-05	1.92e-05	2.37e-05	0.64042	0.739702	0.352682
K02906	0.0011952	0.00114383	0.0011241	0.00119257	0.00121977	0.00118484	0.00115431	0.00110422	0.00113471	0.00115193	0.00117337	0.00109479	0.0011772	0.00112327	0.00109163	0.00121015	0.00112514	0.00121951	0.639953	0.739336	3.36974
K03626	4.96e-06	9.92e-06	4.55e-06	4.26e-06	4.55e-06	4.28e-06	1.33e-05	1.09e-05	1.09e-05	4.68e-06	9.86e-06	1.13e-05	0	1.21e-05	4.07e-06	1.26e-05	4.81e-06	1.78e-05	0.636666	0.735713	-0.215516
K06338	0	0	4.55e-06	0	4.55e-06	4.28e-06	3.34e-06	5.44e-06	3.65e-06	0	4.93e-06	5.67e-06	0	1.82e-05	0	6.3e-06	0	0	0.636366	0.73554	-0.0938212
K07719	1.49e-05	3.31e-05	2.28e-05	3.83e-05	3.19e-05	2.57e-05	2.34e-05	1.63e-05	2.55e-05	3.28e-05	2.47e-05	1.7e-05	4.2e-05	1.21e-05	3.26e-05	1.26e-05	4.33e-05	3.55e-05	0.634644	0.733723	-0.338333
K00385	0	1.65e-05	0	4.26e-06	9.1e-06	0	6.67e-06	5.44e-06	7.3e-06	4.68e-06	0	0	4.67e-06	0	8.15e-06	0	9.62e-06	1.18e-05	0.634109	0.733277	0.123556
K11068	0.000634795	0.000664478	0.000605283	0.000630361	0.000618987	0.000705771	0.000647215	0.000592907	0.000631207	0.000660255	0.000660639	0.000595613	0.000616626	0.000552526	0.000712819	0.000560955	0.000702011	0.000568313	0.633654	0.732924	1.63142
K03698	0.000411625	0.000366951	0.000359529	0.000417401	0.000373212	0.000419185	0.000403675	0.000484117	0.00041594	0.000365247	0.000404271	0.000442455	0.000383056	0.000473594	0.000452131	0.000403383	0.000418322	0.000384795	0.633629	0.732924	-1.41894
K00402	4.96e-06	6.61e-06	9.1e-06	4.26e-06	4.55e-06	4.28e-06	1.33e-05	1.09e-05	1.46e-05	4.68e-06	9.86e-06	1.7e-05	4.67e-06	1.21e-05	4.07e-06	1.26e-05	4.81e-06	1.18e-05	0.633366	0.732924	-0.248615
K08303	0.00184487	0.00190087	0.00174303	0.00185275	0.00187972	0.00176657	0.00175148	0.00164817	0.00176957	0.00177941	0.00185373	0.00176982	0.00185922	0.00175473	0.00166596	0.00170808	0.00175983	0.00185294	0.63297	0.732653	3.0622
K18672	0.000679429	0.000700843	0.000668997	0.000736841	0.000750976	0.000778486	0.000690585	0.000636423	0.000638504	0.000721129	0.00070501	0.000652338	0.000747426	0.000649674	0.000659867	0.000598772	0.000740477	0.000704471	0.632256	0.731999	1.79206
K06148	0.000163658	0.000155375	0.000122877	0.000110739	0.000109233	0.000124045	0.000100085	0.000163185	8.76e-05	0.000121749	7.89e-05	9.08e-05	0.000219556	8.5e-05	0.000248468	9.45e-05	0.000187523	0.000112479	0.632216	0.731999	-0.340905
K06219	0	0	4.55e-06	0	0	0	0	0	3.65e-06	4.68e-06	0	0	0	0	0	0	0	0	0.631343	0.731289	0.0539221
K09158	1.49e-05	9.92e-06	1.37e-05	1.28e-05	9.1e-06	8.55e-06	1.33e-05	1.63e-05	7.3e-06	9.37e-06	4.93e-06	5.67e-06	3.27e-05	6.07e-06	8.15e-06	1.89e-05	4.81e-06	0	0.630827	0.730864	0.190175
K02834	0.00121008	0.00128598	0.00116051	0.00127776	0.00121977	0.00124472	0.00123104	0.00109334	0.00121133	0.00124559	0.00133114	0.00118555	0.00124727	0.0012447	0.00110385	0.00127318	0.00118284	0.0012491	0.630666	0.73085	-2.52887
K01940	0.000510811	0.000528938	0.000509712	0.000592028	0.000600781	0.000547507	0.000550466	0.000636423	0.000518101	0.000533823	0.000488084	0.000550233	0.000523198	0.000570742	0.000615061	0.000554652	0.000610653	0.000443995	0.630549	0.73085	1.40279
K10977	0	6.61e-06	0	0	0	0	1e-05	0	3.65e-06	4.68e-06	0	5.67e-06	4.67e-06	0	0	6.3e-06	0	5.92e-06	0.630018	0.730444	-0.101059
K02881	0.00133902	0.00126945	0.00124697	0.00128628	0.00132445	0.00133027	0.00125773	0.00120213	0.00129525	0.00132051	0.0013903	0.00129333	0.00124727	0.00123863	0.00111607	0.00119754	0.00120688	0.00139118	0.62951	0.730028	2.28154
K02444	4.96e-05	4.3e-05	5.92e-05	4.69e-05	4.55e-05	3.85e-05	1.67e-05	3.81e-05	3.65e-05	4.68e-05	3.45e-05	5.11e-05	4.2e-05	1.21e-05	4.07e-05	1.89e-05	7.21e-05	2.37e-05	0.628978	0.729585	0.333197
K09961	1.98e-05	3.31e-05	3.64e-05	3.41e-05	4.1e-05	4.28e-05	3e-05	3.26e-05	2.19e-05	4.21e-05	2.96e-05	2.27e-05	6.54e-05	4.25e-05	8.15e-06	6.93e-05	3.37e-05	1.18e-05	0.628571	0.729286	-0.27538
K21514	1.98e-05	1.65e-05	1.37e-05	2.13e-05	9.1e-06	1.71e-05	1.33e-05	1.09e-05	1.46e-05	1.87e-05	1.97e-05	2.27e-05	9.34e-06	1.82e-05	4.07e-06	1.89e-05	4.81e-06	3.55e-05	0.628241	0.729076	-0.276851
K09728	4.96e-06	9.92e-06	4.55e-06	4.26e-06	4.55e-06	4.28e-06	1.67e-05	1.09e-05	3.65e-06	4.68e-06	4.93e-06	2.27e-05	4.67e-06	6.07e-06	4.07e-06	6.3e-06	9.62e-06	1.18e-05	0.627846	0.728789	-0.188296
K20488	3.97e-05	4.96e-05	6.37e-05	5.54e-05	5.01e-05	7.7e-05	5e-05	4.9e-05	4.38e-05	4.21e-05	5.42e-05	5.67e-05	6.54e-05	5.46e-05	7.74e-05	4.41e-05	6.73e-05	4.14e-05	0.625872	0.72667	-0.599546
K02867	0.00130926	0.00119342	0.00121512	0.00123517	0.00124252	0.00118484	0.00123104	0.0011151	0.00120404	0.00121749	0.00131142	0.00116854	0.00118654	0.00118399	0.00106312	0.00124797	0.00111072	0.00129646	0.62438	0.72511	2.3092
K09690	0.000233089	0.000257857	0.000204795	0.000285366	0.000291288	0.000299418	0.000236867	0.000310052	0.000251753	0.000187306	0.000241577	0.000266608	0.000275613	0.000267156	0.000293274	0.000277326	0.000259648	0.000230877	0.624057	0.724907	1.00945
K01776	0.000942273	0.000975229	0.000973914	0.000932764	0.00092848	0.000932473	0.000944133	0.000875762	0.000915798	0.000978675	0.000961377	0.000969998	0.000962311	0.000898614	0.00100202	0.000844584	0.000952042	0.000935348	0.62374	0.724711	-3.0972
K01515	0.00081829	0.000846301	0.000841935	0.000958319	0.000914826	0.000941028	0.000840712	0.000859443	0.000846474	0.000880339	0.000818403	0.000901928	0.000840854	0.00077718	0.000944995	0.000750041	0.000995317	0.00081695	0.623446	0.724541	1.70177
K13281	0	6.61e-06	4.55e-06	8.52e-06	4.55e-06	0	1e-05	5.44e-06	7.3e-06	4.68e-06	0	0	1.4e-05	1.21e-05	0	6.3e-06	0	0	0.623334	0.724541	0.131156
K18475	0.000287641	0.000330586	0.000282162	0.000391846	0.000359558	0.000320805	0.000333616	0.000359008	0.000328374	0.000332469	0.00033525	0.00036304	0.000355027	0.00024894	0.000464351	0.000258417	0.000427938	0.000325596	0.622212	0.723451	-0.807419
K07739	1.98e-05	1.98e-05	1.37e-05	8.52e-06	4.55e-06	8.55e-06	1.33e-05	1.09e-05	1.09e-05	9.37e-06	1.48e-05	2.27e-05	4.67e-06	1.82e-05	8.15e-06	1.26e-05	4.81e-06	2.96e-05	0.620964	0.722171	-0.24696
K17242	0	3.31e-06	4.55e-06	4.26e-06	1.37e-05	0	3.34e-06	5.44e-06	3.65e-06	0	9.86e-06	5.67e-06	9.34e-06	6.07e-06	4.07e-06	1.26e-05	0	0	0.620761	0.722106	-0.143657
K15916	9.92e-06	1.65e-05	9.1e-06	8.52e-06	1.37e-05	2.57e-05	2.34e-05	3.26e-05	2.55e-05	9.37e-06	1.97e-05	2.27e-05	9.34e-06	2.43e-05	8.15e-06	3.15e-05	9.62e-06	1.18e-05	0.62038	0.721835	0.264769
K18784	9.92e-06	6.61e-06	9.1e-06	8.52e-06	0	4.28e-06	1e-05	5.44e-06	3.65e-06	4.68e-06	4.93e-06	0	4.67e-06	6.07e-06	8.15e-06	6.3e-06	1.44e-05	0	0.619879	0.721423	0.201887
K17884	4.96e-06	1.32e-05	9.1e-06	4.26e-06	4.55e-06	8.55e-06	1e-05	1.09e-05	7.3e-06	4.68e-06	4.93e-06	1.7e-05	4.67e-06	1.21e-05	4.07e-06	1.26e-05	4.81e-06	1.78e-05	0.619704	0.721392	-0.248941
K14126	4.96e-06	9.92e-06	4.55e-06	4.26e-06	4.55e-06	8.55e-06	1.33e-05	1.09e-05	7.3e-06	4.68e-06	9.86e-06	1.13e-05	4.67e-06	1.21e-05	4.07e-06	1.26e-05	4.81e-06	1.18e-05	0.618685	0.720376	-0.300617
K00283	0.000193414	0.000165293	0.000150183	0.000136294	0.000141093	0.000141154	0.000160136	0.000168625	0.000153241	0.000182624	0.000162695	0.000170175	0.000168171	0.000157865	9.78e-05	0.00017648	0.000144249	0.000201278	0.618162	0.719938	-0.87903
K20627	4.96e-06	3.31e-06	1.82e-05	0	0	4.28e-06	3.34e-06	5.44e-06	3.65e-06	9.37e-06	0	0	9.34e-06	0	4.07e-06	0	9.62e-06	0	0.618057	0.719938	0.111494
K07709	0	3.31e-06	4.55e-06	0	0	0	0	5.44e-06	0	0	0	0	4.67e-06	0	4.07e-06	0	0	0	0.618048	0.719938	0.0768657
K00281	2.48e-05	2.98e-05	2.73e-05	1.28e-05	9.1e-06	2.14e-05	2e-05	4.35e-05	1.82e-05	9.37e-06	2.96e-05	2.27e-05	2.8e-05	3.64e-05	2.04e-05	3.15e-05	1.92e-05	2.96e-05	0.616801	0.718867	-0.349542
K03668	1.49e-05	3.31e-06	4.55e-06	8.52e-06	9.1e-06	4.28e-06	6.67e-06	5.44e-06	7.3e-06	4.68e-06	4.93e-06	5.67e-06	4.67e-06	6.07e-06	8.15e-06	1.26e-05	9.62e-06	0	0.615711	0.717767	0.252746
K19076	0	6.61e-06	4.55e-06	8.52e-06	1.37e-05	4.28e-06	1.33e-05	0	1.46e-05	0	0	5.67e-06	1.4e-05	1.82e-05	1.22e-05	1.89e-05	4.81e-06	5.92e-06	0.614437	0.716453	-0.166726
K02864	0.00130926	0.00131904	0.00117871	0.00120535	0.00127893	0.00121906	0.00121436	0.0011423	0.00124782	0.00125495	0.00128184	0.0012593	0.00126595	0.00116577	0.00110385	0.00124166	0.00116841	0.00124318	0.614297	0.716453	2.76297
K03328	5.46e-05	6.61e-05	4.55e-05	6.39e-05	8.19e-05	3.85e-05	4.67e-05	5.44e-05	3.65e-05	5.15e-05	5.42e-05	3.4e-05	6.54e-05	3.64e-05	8.15e-05	3.78e-05	5.29e-05	4.14e-05	0.611835	0.713759	0.470661
K20265	5.46e-05	4.96e-05	5.92e-05	3.83e-05	2.28e-05	1.71e-05	3e-05	4.9e-05	1.82e-05	4.21e-05	1.97e-05	1.7e-05	5.61e-05	6.07e-05	5.3e-05	6.93e-05	1.92e-05	4.14e-05	0.609483	0.711185	-0.301444
K09976	5.46e-05	6.61e-05	5.46e-05	4.69e-05	5.01e-05	5.99e-05	3.67e-05	5.44e-05	4.74e-05	3.75e-05	3.94e-05	4.54e-05	8.41e-05	6.07e-05	4.48e-05	5.04e-05	3.37e-05	4.74e-05	0.608469	0.710171	0.56178
K02323	4.96e-06	9.92e-06	4.55e-06	4.26e-06	4.55e-06	8.55e-06	1e-05	1.09e-05	1.46e-05	4.68e-06	9.86e-06	1.7e-05	4.67e-06	1.21e-05	4.07e-06	1.26e-05	4.81e-06	1.18e-05	0.608331	0.710171	-0.277821
K01267	0.000396747	0.000426456	0.000445998	0.000489808	0.000427829	0.000402075	0.000433701	0.000484117	0.00046702	0.000454218	0.000438782	0.00043111	0.000518527	0.00038859	0.000533596	0.000384475	0.000504871	0.000420315	0.607883	0.709826	-1.34484
K22516	0	6.61e-06	4.55e-06	0	0	0	6.67e-06	0	0	0	0	5.67e-06	0	0	0	0	0	5.92e-06	0.607146	0.709134	0.0796832
K18335	0	3.31e-06	0	0	4.55e-06	0	6.67e-06	0	0	4.68e-06	0	0	4.67e-06	0	0	0	0	0	0.607097	0.709134	0.0779348
K01610	0.00044634	0.000413233	0.000427794	0.000391846	0.000441483	0.000414908	0.000470398	0.000456919	0.000408643	0.000393343	0.000394411	0.0004538	0.000434441	0.00038859	0.00048879	0.000390778	0.000427938	0.000432155	0.606788	0.709054	1.9309
K09181	1.49e-05	1.65e-05	1.37e-05	8.52e-06	9.1e-06	2.14e-05	1.33e-05	3.81e-05	1.09e-05	9.37e-06	1.48e-05	1.7e-05	9.34e-06	1.82e-05	8.15e-06	2.52e-05	9.62e-06	1.78e-05	0.606289	0.70864	0.276566
K04655	4.96e-05	6.28e-05	6.83e-05	3.41e-05	6.83e-05	5.13e-05	7.34e-05	3.81e-05	6.57e-05	7.96e-05	6.9e-05	3.97e-05	7.01e-05	3.64e-05	6.92e-05	4.41e-05	7.21e-05	6.51e-05	0.605937	0.708398	-0.533589
K20449	0	3.31e-06	4.55e-06	4.26e-06	0	4.28e-06	3.34e-06	0	1.09e-05	9.37e-06	4.93e-06	0	4.67e-06	0	4.07e-06	0	0	0	0.605817	0.708398	0.120251
K10804	9.92e-06	2.64e-05	1.82e-05	2.13e-05	1.37e-05	1.71e-05	2e-05	1.63e-05	2.55e-05	1.87e-05	3.45e-05	1.13e-05	1.87e-05	1.21e-05	1.63e-05	1.89e-05	2.88e-05	2.37e-05	0.605695	0.708398	-0.410628
K02896	4.96e-06	9.92e-06	9.1e-06	4.26e-06	4.55e-06	8.55e-06	1.33e-05	1.09e-05	7.3e-06	4.68e-06	9.86e-06	1.13e-05	4.67e-06	1.21e-05	4.07e-06	1.26e-05	4.81e-06	1.78e-05	0.60565	0.708398	-0.291349
K14261	4.96e-06	1.32e-05	1.37e-05	8.52e-06	9.1e-06	4.28e-06	3.34e-06	2.18e-05	7.3e-06	1.87e-05	9.86e-06	5.67e-06	9.34e-06	1.21e-05	8.15e-06	1.89e-05	9.62e-06	5.92e-06	0.605415	0.708398	-0.260978
K05366	0.000798453	0.000753736	0.000673548	0.0007411	0.00082835	0.00082126	0.000750636	0.000761532	0.000733368	0.000753908	0.000724731	0.00074877	0.000724069	0.000758965	0.000802431	0.000787858	0.000721244	0.000751831	0.605369	0.708398	2.6393
K03429	0.000277723	0.000274387	0.00027306	0.000268329	0.000273082	0.000278031	0.000270229	0.000179504	0.000251753	0.000290325	0.000330319	0.000260935	0.000266271	0.000297514	0.00016293	0.000277326	0.00022599	0.000331516	0.604818	0.708104	-0.84497
K02398	8.43e-05	9.59e-05	0.000100122	0.000123517	0.000145644	0.000162541	0.000140119	0.000119669	0.000127701	8.9e-05	0.000123253	0.000119123	0.000112114	0.000103219	0.000171077	9.45e-05	0.000144249	8.29e-05	0.604755	0.708104	0.609689
K07741	6.45e-05	7.93e-05	6.37e-05	0.000114998	0.000104682	0.000111212	5.34e-05	0.00010879	5.11e-05	6.09e-05	7.4e-05	7.94e-05	5.61e-05	0.000115363	6.52e-05	0.000113452	4.81e-05	8.29e-05	0.604747	0.708104	0.440439
K02950	0.00115552	0.00114713	0.00106038	0.00122239	0.00115605	0.00122334	0.00115431	0.0010607	0.00120769	0.00117066	0.00114872	0.00108345	0.00123792	0.00106255	0.00112829	0.00103367	0.00116361	0.00121359	0.604704	0.708104	2.43621
K03815	4.96e-06	0	0	0	0	0	0	0	3.65e-06	0	0	0	4.67e-06	0	0	0	0	0	0.603205	0.706892	0.0582122
K03469	0.00109105	0.00106118	0.00108769	0.0010648	0.00111053	0.00108646	0.00113429	0.000946475	0.00114201	0.00116598	0.00115365	0.00116286	0.00107442	0.00109291	0.000904262	0.001103	0.00105783	0.00117215	0.603187	0.706892	-2.08369
K16937	4.96e-06	9.92e-06	4.55e-06	8.52e-06	4.55e-06	1.28e-05	6.67e-06	1.63e-05	7.3e-06	4.68e-06	4.93e-06	5.67e-06	4.67e-06	1.82e-05	4.07e-06	1.26e-05	4.81e-06	5.92e-06	0.603139	0.706892	0.243327
K22222	4.96e-06	6.61e-06	4.55e-06	8.52e-06	1.82e-05	1.28e-05	1.33e-05	1.63e-05	1.82e-05	9.37e-06	9.86e-06	5.67e-06	9.34e-06	6.07e-06	4.07e-06	2.52e-05	1.44e-05	5.92e-06	0.602997	0.706892	0.246894
K01867	0.00111089	0.00114713	0.00109679	0.00103498	0.00107412	0.0010608	0.00107758	0.000968233	0.00112377	0.00108169	0.00114379	0.00108912	0.00112581	0.00106255	0.00100609	0.00105258	0.0011011	0.00114255	0.602721	0.706892	-3.04242
K00703	0.000872843	0.000852912	0.000823731	0.00084758	0.000887517	0.000859757	0.000864065	0.000859443	0.000853772	0.000833513	0.000838124	0.000862221	0.000873554	0.000880399	0.000924629	0.000800464	0.00095685	0.00083471	0.60178	0.706067	-3.26209
K02933	0.00127455	0.00119342	0.00116051	0.00119257	0.00121977	0.00118484	0.00115765	0.00109878	0.00125877	0.00121281	0.00125719	0.00116854	0.00121457	0.00117184	0.00109163	0.00117233	0.00113476	0.00120174	0.601589	0.706013	3.22488
K00800	0.000838127	0.000869442	0.0009102	0.000830544	0.00082835	0.000799873	0.000857393	0.000941036	0.000893906	0.000870974	0.000897285	0.000850876	0.000920268	0.000825754	0.000977581	0.000831978	0.000879918	0.00082287	0.601174	0.705695	-2.51525
K02686	4.96e-06	3.31e-06	4.55e-06	4.26e-06	4.55e-06	4.28e-06	3.34e-06	5.44e-06	3.65e-06	4.68e-06	0	0	9.34e-06	6.07e-06	8.15e-06	1.26e-05	4.81e-06	0	0.601067	0.705695	-0.200767
K15894	4.96e-06	6.61e-06	1.82e-05	4.26e-06	0	4.28e-06	6.67e-06	0	7.3e-06	4.68e-06	0	1.13e-05	0	6.07e-06	0	1.26e-05	0	5.92e-06	0.600687	0.705461	0.138837
K02168	4.96e-06	0	1.37e-05	1.28e-05	0	0	3.34e-06	0	3.65e-06	4.68e-06	4.93e-06	0	0	6.07e-06	0	0	0	1.18e-05	0.600491	0.705401	0.105346
K02521	1.98e-05	6.61e-06	3.19e-05	8.52e-06	1.37e-05	1.28e-05	1.33e-05	1.63e-05	1.82e-05	1.4e-05	1.97e-05	1.13e-05	4.67e-06	2.43e-05	8.15e-06	2.52e-05	4.81e-06	1.18e-05	0.600176	0.7052	0.270585
K10188	3.97e-05	3.31e-05	5.46e-05	5.11e-05	5.01e-05	2.99e-05	4.34e-05	7.07e-05	3.28e-05	4.21e-05	2.47e-05	5.11e-05	3.74e-05	3.64e-05	4.48e-05	3.15e-05	6.73e-05	4.14e-05	0.600002	0.705164	0.478939
K06941	0.00110593	0.00106779	0.00107404	0.00102221	0.00108778	0.00100519	0.00106757	0.00102807	0.00102161	0.00112384	0.00108463	0.00109479	0.0010791	0.00101398	0.000969434	0.0010904	0.00105783	0.00105967	0.599798	0.705094	-3.58636
K01463	4.96e-06	3.31e-06	9.1e-06	0	0	0	6.67e-06	0	3.65e-06	1.4e-05	0	5.67e-06	0	6.07e-06	0	1.26e-05	0	0	0.599581	0.705008	-0.109215
K06973	0.0007439	0.000780183	0.000664446	0.000685731	0.000737322	0.000701493	0.000727282	0.000685379	0.000616613	0.000618111	0.000759242	0.000737425	0.000766112	0.000643602	0.000777991	0.000617681	0.000827026	0.000739991	0.599052	0.704555	-1.5649
K07315	0.000188455	0.000145458	0.000204795	0.000149072	0.000186606	0.000153986	0.000200169	0.000206701	0.000175133	0.000149845	0.000187345	0.000170175	0.000168171	0.000218582	0.000130344	0.000201692	0.000153865	0.000171678	0.597537	0.702942	0.959845
K06929	9.92e-06	3.31e-06	4.55e-06	0	0	0	6.67e-06	5.44e-06	3.65e-06	4.68e-06	4.93e-06	0	4.67e-06	1.21e-05	4.07e-06	1.26e-05	0	0	0.59704	0.702526	-0.143834
K02919	0.000128943	0.000125623	0.000127428	0.000136294	0.00010013	0.000132599	0.000160136	0.000141427	0.000134998	0.000103018	0.000108463	0.000130468	0.000154157	0.000163936	0.000154784	0.000189086	0.000125016	0.000112479	0.595811	0.701249	-0.811259
K00700	0.000778615	0.000813242	0.000778221	0.000762396	0.000901172	0.000842647	0.000810686	0.000821366	0.000853772	0.000852243	0.00070008	0.000794151	0.000882897	0.00074075	0.000867603	0.00072483	0.000932809	0.000710391	0.595661	0.701242	1.67634
K22251	0	6.61e-06	1.37e-05	0	4.55e-06	0	3.34e-06	0	0	0	4.93e-06	0	4.67e-06	6.07e-06	4.07e-06	1.26e-05	0	5.92e-06	0.59489	0.700502	-0.119362
K20810	1.98e-05	9.92e-06	9.1e-06	8.52e-06	9.1e-06	4.28e-06	1e-05	0	1.09e-05	9.37e-06	9.86e-06	0	0	1.21e-05	8.15e-06	1.89e-05	9.62e-06	0	0.594667	0.700408	0.198718
K16370	4.96e-06	9.92e-06	9.1e-06	8.52e-06	1.37e-05	4.28e-06	1.33e-05	5.44e-06	7.3e-06	4.68e-06	9.86e-06	1.13e-05	9.34e-06	1.82e-05	4.07e-06	1.26e-05	9.62e-06	5.92e-06	0.594494	0.700372	-0.323618
K18925	1.49e-05	6.61e-06	4.55e-06	4.26e-06	4.55e-06	0	3.34e-06	1.09e-05	7.3e-06	9.37e-06	4.93e-06	5.67e-06	9.34e-06	6.07e-06	8.15e-06	1.26e-05	9.62e-06	0	0.592988	0.698766	-0.238739
K07150	0.00037195	0.000436374	0.000377733	0.000391846	0.000286736	0.000342192	0.000430364	0.000391645	0.00041594	0.000421439	0.000399341	0.000425438	0.000359699	0.00035216	0.000370666	0.000428595	0.000375047	0.000402555	0.592832	0.698751	-1.41426
K06413	3.47e-05	1.65e-05	4.1e-05	2.56e-05	3.64e-05	3.42e-05	4e-05	2.72e-05	2.92e-05	9.37e-06	3.45e-05	2.27e-05	4.2e-05	3.04e-05	3.26e-05	5.04e-05	1.44e-05	2.37e-05	0.592822	0.698751	0.402527
K02782	4.96e-06	1.65e-05	9.1e-06	2.56e-05	4.55e-06	1.28e-05	3.34e-06	5.44e-06	7.3e-06	0	1.48e-05	2.27e-05	4.67e-06	6.07e-06	8.15e-06	6.3e-06	4.81e-06	5.92e-06	0.592716	0.698751	0.18428
K07792	9.92e-06	1.65e-05	2.28e-05	1.7e-05	1.82e-05	1.28e-05	1e-05	5.44e-06	7.3e-06	1.87e-05	1.97e-05	5.67e-06	1.4e-05	1.82e-05	1.22e-05	2.52e-05	1.44e-05	5.92e-06	0.592676	0.698751	-0.330946
K06980	9.92e-06	6.61e-06	9.1e-06	4.26e-06	4.55e-06	8.55e-06	6.67e-06	5.44e-06	7.3e-06	0	4.93e-06	0	1.4e-05	1.21e-05	4.07e-06	1.26e-05	4.81e-06	0	0.591815	0.698225	0.213417
K14091	0	0	0	0	0	0	0	5.44e-06	3.65e-06	0	0	0	0	0	0	0	4.81e-06	0	0.591523	0.698048	0.0597471
K01337	4.96e-06	6.61e-06	4.55e-06	8.52e-06	9.1e-06	4.28e-06	6.67e-06	5.44e-06	0	0	9.86e-06	1.13e-05	9.34e-06	6.07e-06	4.07e-06	6.3e-06	0	1.18e-05	0.59063	0.697162	-0.233734
K09811	0.000833168	0.000757042	0.000741813	0.000834803	0.000851106	0.000902531	0.000770652	0.000810487	0.000751611	0.0008101	0.000778962	0.000782806	0.000850197	0.000789323	0.000916482	0.000787858	0.000855876	0.00079919	0.590417	0.69708	-2.30165
K13622	9.92e-06	1.65e-05	0	4.26e-06	4.55e-06	0	3.34e-06	5.44e-06	3.65e-06	4.68e-06	4.93e-06	5.67e-06	4.67e-06	6.07e-06	0	6.3e-06	0	5.92e-06	0.589711	0.696414	0.169389
K02230	9.42e-05	6.28e-05	8.19e-05	7.24e-05	6.37e-05	5.56e-05	6.34e-05	9.79e-05	7.3e-05	4.68e-05	7.89e-05	7.94e-05	6.07e-05	8.5e-05	5.7e-05	9.45e-05	6.25e-05	6.51e-05	0.589645	0.696414	0.687436
K03490	8.43e-05	0.000102482	0.000100122	8.94e-05	9.1e-05	8.13e-05	9.67e-05	0.00011423	7.66e-05	9.37e-05	5.92e-05	6.24e-05	0.000102771	8.5e-05	0.000114051	7.56e-05	0.000139441	5.33e-05	0.589455	0.696414	0.595278
K10550	0	3.31e-06	0	4.26e-06	4.55e-06	0	3.34e-06	5.44e-06	0	0	4.93e-06	5.67e-06	0	6.07e-06	4.07e-06	6.3e-06	0	0	0.589173	0.696283	-0.145451
K21576	4.96e-06	2.98e-05	2.73e-05	2.98e-05	0	2.14e-05	2.34e-05	1.63e-05	2.19e-05	3.28e-05	3.45e-05	1.7e-05	1.4e-05	1.21e-05	1.22e-05	1.26e-05	2.88e-05	3.55e-05	0.588667	0.695852	-0.283796
K02909	0.0011952	0.00111738	0.00108314	0.00106906	0.00114239	0.00114207	0.00104755	0.000973673	0.00110917	0.00119408	0.001129	0.00106643	0.00116318	0.00110505	0.00102239	0.00108409	0.00111552	0.00113663	0.587099	0.694167	-2.74058
K03834	0	3.31e-06	0	0	0	4.28e-06	3.34e-06	5.44e-06	0	0	4.93e-06	5.67e-06	0	6.07e-06	0	0	0	5.92e-06	0.58698	0.694167	-0.118052
K07665	1.49e-05	0	0	0	0	0	6.67e-06	0	0	0	9.86e-06	0	0	6.07e-06	4.07e-06	6.3e-06	0	5.92e-06	0.585153	0.6922	-0.0961148
K01889	0.0010117	0.00105788	0.00100577	0.00101369	0.00105137	0.00100091	0.00102754	0.000919278	0.00101796	0.00107233	0.000995888	0.00105509	0.000980997	0.00104434	0.000961288	0.00100846	0.0009857	0.00110703	0.585134	0.6922	-3.31961
K07457	4.96e-06	6.61e-06	9.1e-06	8.52e-06	4.55e-06	0	3.34e-06	1.09e-05	1.46e-05	9.37e-06	4.93e-06	1.13e-05	0	6.07e-06	8.15e-06	6.3e-06	9.62e-06	1.78e-05	0.584941	0.6922	-0.236612
K09724	0	3.31e-06	0	0	0	0	3.34e-06	0	0	0	0	5.67e-06	0	0	0	0	0	5.92e-06	0.584034	0.691377	-0.0706806
K14107	0	3.31e-06	0	0	0	0	3.34e-06	0	0	0	0	5.67e-06	0	0	0	0	0	5.92e-06	0.584034	0.691377	-0.0706806
K19266	0	3.31e-06	0	0	0	0	3.34e-06	0	0	0	0	5.67e-06	0	0	0	0	0	5.92e-06	0.584034	0.691377	-0.0706806
K01258	0.00066951	0.000644643	0.000641691	0.000557955	0.000523408	0.000568894	0.0005905	0.000641862	0.000642153	0.000580649	0.000596547	0.000584268	0.000593269	0.000576813	0.000635428	0.000605075	0.000653928	0.000556473	0.583329	0.691045	2.1262
K11891	4.96e-06	3.31e-06	1.37e-05	0	4.55e-06	8.55e-06	0	0	0	4.68e-06	0	0	0	6.07e-06	8.15e-06	6.3e-06	0	0	0.582267	0.689954	0.117983
K03806	9.92e-06	6.61e-06	1.37e-05	4.26e-06	4.55e-06	8.55e-06	3.34e-06	1.09e-05	3.65e-06	9.37e-06	0	5.67e-06	9.34e-06	6.07e-06	8.15e-06	1.26e-05	4.81e-06	0	0.581912	0.689699	0.248334
K16710	2.98e-05	1.98e-05	2.73e-05	2.98e-05	3.19e-05	2.99e-05	6.67e-06	3.26e-05	2.92e-05	2.81e-05	1.97e-05	3.97e-05	2.8e-05	1.82e-05	4.07e-05	1.26e-05	4.33e-05	2.96e-05	0.581368	0.689222	-0.420652
K22212	4.96e-06	0	4.55e-06	0	4.55e-06	0	0	0	0	0	0	5.67e-06	4.67e-06	0	0	0	0	1.18e-05	0.580922	0.68886	-0.0871759
K07991	4.96e-06	9.92e-06	4.55e-06	4.26e-06	4.55e-06	4.28e-06	6.67e-06	1.09e-05	7.3e-06	4.68e-06	4.93e-06	1.13e-05	4.67e-06	1.21e-05	4.07e-06	6.3e-06	4.81e-06	1.18e-05	0.580599	0.688644	-0.327217
K14187	9.92e-06	9.92e-06	1.37e-05	4.26e-06	4.55e-06	1.28e-05	6.67e-06	1.63e-05	7.3e-06	4.68e-06	9.86e-06	1.13e-05	4.67e-06	1.21e-05	4.07e-06	1.26e-05	4.81e-06	1.18e-05	0.579798	0.68786	0.331299
K17467	0	6.61e-06	0	4.26e-06	9.1e-06	0	0	5.44e-06	0	4.68e-06	4.93e-06	0	4.67e-06	6.07e-06	8.15e-06	0	4.81e-06	0	0.579755	0.68786	-0.145515
K02952	0.00119024	0.00120664	0.00120601	0.00123091	0.00122432	0.00126611	0.00115431	0.00113142	0.00121133	0.00113788	0.00125719	0.00112316	0.00123325	0.0012022	0.00112014	0.00117864	0.00117803	0.00127278	0.579407	0.68773	3.57705
K00245	1.49e-05	1.65e-05	2.73e-05	1.28e-05	9.1e-06	8.55e-06	3.34e-06	1.63e-05	1.46e-05	1.87e-05	4.93e-06	5.67e-06	1.4e-05	2.43e-05	2.04e-05	1.26e-05	2.88e-05	1.18e-05	0.57892	0.687318	-0.292114
K03762	0	1.32e-05	4.55e-06	2.56e-05	2.28e-05	1.71e-05	0	0	0	0	0	0	0	2.43e-05	8.15e-06	2.52e-05	0	0	0.578909	0.687318	0.108228
K11928	0.000342194	0.000333892	0.000354978	0.000357773	0.000314045	0.000380688	0.00039033	0.000386205	0.000361211	0.000393343	0.00035497	0.000397075	0.000303642	0.000400733	0.000329934	0.000384475	0.00039428	0.000337436	0.577965	0.686517	-1.72699
K16917	0	3.31e-06	0	0	4.55e-06	0	0	0	0	0	0	0	0	0	4.07e-06	0	0	0	0.577647	0.686307	0.0623051
K00018	0.000421543	0.000442985	0.000450549	0.000455734	0.00043238	0.00041063	0.000423692	0.000456919	0.000426886	0.000435487	0.000448643	0.00040842	0.00042977	0.000400733	0.000464351	0.000466412	0.000524104	0.000414395	0.577129	0.685857	-2.21223
K03319	1.49e-05	3.31e-05	3.64e-05	1.7e-05	1.82e-05	1.28e-05	1.67e-05	2.18e-05	1.82e-05	1.4e-05	9.86e-06	0	4.67e-05	0	3.67e-05	6.3e-06	1.44e-05	2.96e-05	0.57681	0.685645	0.218502
K17243	4.96e-06	3.31e-06	9.1e-06	8.52e-06	4.55e-06	0	1.33e-05	1.09e-05	1.09e-05	4.68e-06	9.86e-06	1.13e-05	9.34e-06	0	4.07e-06	6.3e-06	9.62e-06	0	0.576171	0.685051	0.232177
K09020	0	3.31e-06	4.55e-06	0	0	0	3.34e-06	5.44e-06	0	0	4.93e-06	5.67e-06	4.67e-06	0	8.15e-06	0	0	0	0.576022	0.685041	-0.117943
K02283	0.000411625	0.000469432	0.000441447	0.000468512	0.000546165	0.000603113	0.000463726	0.000478677	0.000481615	0.000524458	0.000399341	0.000436783	0.000537212	0.000406805	0.000586548	0.000340355	0.000504871	0.000461754	0.575511	0.684599	1.03121
K01220	0	0	0	0	4.55e-06	0	3.34e-06	0	0	0	0	0	0	0	4.07e-06	0	0	0	0.575372	0.684599	0.0627078
K01569	4.96e-06	3.31e-06	0	4.26e-06	9.1e-06	4.28e-06	0	0	0	0	0	0	9.34e-06	6.07e-06	8.15e-06	1.26e-05	0	0	0.574467	0.683689	-0.121856
K00600	0.000679429	0.000737207	0.00072816	0.000719804	0.000710014	0.000765654	0.000717274	0.000707137	0.000718773	0.00068835	0.000631058	0.00077146	0.000668012	0.000783252	0.00066394	0.000743738	0.000726052	0.000710391	0.573948	0.683239	2.67153
K01270	0.000570323	0.000618196	0.000600732	0.000553696	0.000609884	0.000590281	0.000600508	0.000728895	0.000627559	0.000613428	0.000621198	0.000606958	0.000691369	0.000534311	0.000782065	0.000542046	0.00075971	0.000532793	0.573077	0.682368	-1.23324
K11384	0	0	4.55e-06	4.26e-06	4.55e-06	0	0	5.44e-06	0	0	0	0	0	6.07e-06	0	6.3e-06	0	0	0.570272	0.679193	0.0996787
K03223	4.96e-06	9.92e-06	4.55e-06	8.52e-06	9.1e-06	0	6.67e-06	5.44e-06	7.3e-06	4.68e-06	9.86e-06	5.67e-06	4.67e-06	1.21e-05	4.07e-06	1.26e-05	4.81e-06	5.92e-06	0.56885	0.677663	-0.316032
K03224	4.96e-06	9.92e-06	4.55e-06	8.52e-06	9.1e-06	0	6.67e-06	5.44e-06	7.3e-06	4.68e-06	9.86e-06	5.67e-06	4.67e-06	1.21e-05	4.07e-06	1.26e-05	4.81e-06	5.92e-06	0.56885	0.677663	-0.316032
K09801	4.96e-06	3.31e-06	4.55e-06	4.26e-06	4.55e-06	4.28e-06	3.34e-06	5.44e-06	3.65e-06	4.68e-06	0	0	4.67e-06	1.21e-05	8.15e-06	1.26e-05	4.81e-06	0	0.568486	0.67756	-0.204286
K12993	0	0	0	0	0	0	3.34e-06	0	3.65e-06	0	0	0	4.67e-06	0	8.15e-06	0	0	0	0.568301	0.677504	-0.0705799
K12996	1.49e-05	1.32e-05	4.55e-06	4.26e-05	3.64e-05	4.28e-05	1.67e-05	2.18e-05	1.82e-05	1.87e-05	1.97e-05	5.67e-06	1.87e-05	1.82e-05	3.67e-05	1.26e-05	3.37e-05	1.78e-05	0.568065	0.677388	0.278125
K21395	2.48e-05	3.97e-05	5.01e-05	2.56e-05	1.82e-05	3.85e-05	3.34e-05	5.44e-05	3.28e-05	2.34e-05	3.45e-05	6.81e-05	3.27e-05	5.46e-05	2.44e-05	5.67e-05	2.88e-05	2.96e-05	0.566437	0.675611	-0.398193
K21401	4.96e-06	3.31e-06	0	0	0	0	3.34e-06	0	3.65e-06	4.68e-06	0	0	0	6.07e-06	0	0	4.81e-06	5.92e-06	0.565436	0.674581	-0.124498
K02922	4.96e-06	1.32e-05	9.1e-06	4.26e-06	4.55e-06	8.55e-06	1e-05	1.09e-05	1.09e-05	4.68e-06	9.86e-06	1.7e-05	4.67e-06	1.21e-05	4.07e-06	1.26e-05	4.81e-06	1.78e-05	0.565193	0.674457	-0.309861
K02854	6.94e-05	8.26e-05	8.65e-05	7.24e-05	7.74e-05	8.98e-05	0.000110093	4.9e-05	0.000109458	8.43e-05	7.4e-05	7.37e-05	7.01e-05	4.86e-05	8.55e-05	7.56e-05	0.000125016	5.92e-05	0.564993	0.674381	0.601878
K02879	0.00126959	0.00126945	0.0011423	0.0012522	0.00121977	0.001249	0.0012177	0.00110966	0.00118214	0.00117535	0.0012917	0.00110614	0.0011772	0.00126899	0.00109978	0.00122906	0.00114918	0.00125503	0.564566	0.674037	2.87722
K22736	0	3.31e-06	0	0	9.1e-06	0	0	0	0	0	0	0	0	0	0	0	0	5.92e-06	0.56388	0.673383	0.0600018
K20509	0	3.31e-06	0	4.26e-06	4.55e-06	4.28e-06	3.34e-06	0	3.65e-06	0	0	0	0	6.07e-06	0	6.3e-06	4.81e-06	0	0.563853	0.673383	0.13881
K11249	3.47e-05	2.98e-05	4.55e-05	4.69e-05	3.64e-05	4.28e-05	5e-05	5.44e-05	5.47e-05	3.75e-05	5.92e-05	3.97e-05	3.74e-05	5.46e-05	2.85e-05	4.41e-05	2.88e-05	4.14e-05	0.563844	0.673383	0.678534
K18581	9.92e-05	0.000105788	9.56e-05	0.000102221	7.28e-05	0.000102658	0.000113429	0.000130548	0.000102161	0.000135797	6.41e-05	0.000102105	0.0001308	6.68e-05	0.000224029	0.000100846	0.000144249	5.33e-05	0.56356	0.673383	-0.424276
K11814	4.96e-06	0	4.55e-06	8.52e-06	0	4.28e-06	0	0	0	0	4.93e-06	0	0	6.07e-06	4.07e-06	0	0	0	0.562765	0.672707	0.110307
K07552	7.44e-05	4.3e-05	9.56e-05	5.54e-05	6.37e-05	4.71e-05	6.01e-05	6.53e-05	4.74e-05	3.75e-05	3.94e-05	3.97e-05	8.41e-05	7.89e-05	7.74e-05	6.93e-05	4.33e-05	3.55e-05	0.561104	0.670885	0.485617
K13684	9.92e-06	1.65e-05	0	8.52e-06	9.1e-06	1.28e-05	1.67e-05	1.63e-05	0	4.68e-06	1.97e-05	1.7e-05	4.67e-06	1.21e-05	4.07e-06	6.3e-06	4.81e-06	0	0.560845	0.670739	0.213213
K01496	7.93e-05	0.000109093	0.000122877	0.000114998	9.56e-05	8.13e-05	9.67e-05	0.00010879	9.12e-05	9.83e-05	0.000103533	0.00011345	8.88e-05	0.000103219	6.52e-05	0.000144966	0.000105782	0.000124318	0.560753	0.670739	-0.835756
K01093	4.96e-06	3.31e-06	4.55e-06	4.26e-06	4.55e-06	4.28e-06	6.67e-06	1.09e-05	3.65e-06	4.68e-06	4.93e-06	0	4.67e-06	6.07e-06	4.07e-06	6.3e-06	9.62e-06	0	0.560726	0.670739	0.278081
K13788	9.92e-06	6.61e-06	1.82e-05	8.52e-06	9.1e-06	8.55e-06	3.34e-06	5.44e-06	1.09e-05	1.87e-05	0	1.13e-05	4.67e-06	1.21e-05	4.07e-06	1.26e-05	1.92e-05	1.18e-05	0.558315	0.668203	-0.275917
K06310	4.46e-05	3.64e-05	4.1e-05	2.98e-05	4.55e-05	5.99e-05	3.34e-05	5.98e-05	4.01e-05	2.81e-05	2.96e-05	4.54e-05	5.14e-05	3.64e-05	6.92e-05	3.15e-05	4.33e-05	2.37e-05	0.557541	0.66744	0.515101
K06867	3.47e-05	1.32e-05	1.37e-05	1.7e-05	3.64e-05	2.14e-05	2e-05	2.18e-05	1.82e-05	1.87e-05	2.96e-05	1.13e-05	1.4e-05	4.25e-05	2.04e-05	4.41e-05	2.4e-05	1.78e-05	0.557288	0.667301	-0.353775
K21703	0	0	4.55e-06	0	0	8.55e-06	0	1.09e-05	0	4.68e-06	0	5.67e-06	4.67e-06	0	0	0	0	0	0.557199	0.667301	0.0954769
K07533	0.000213251	0.000254551	0.000268509	0.00026407	0.000254877	0.00031225	0.000200169	0.000271976	0.000244456	0.000154528	0.000192275	0.000187193	0.000308313	0.000206438	0.000354373	0.000214297	0.000336581	0.000183518	0.556858	0.667113	0.663894
K19431	9.92e-06	3.31e-06	4.55e-06	4.26e-06	4.55e-06	4.28e-06	3.34e-06	0	3.65e-06	1.4e-05	0	5.67e-06	0	6.07e-06	0	6.3e-06	9.62e-06	5.92e-06	0.556827	0.667113	-0.193505
K03297	4.96e-05	1.65e-05	3.19e-05	1.28e-05	9.1e-06	2.99e-05	1e-05	1.63e-05	2.19e-05	2.34e-05	4.93e-06	0	1.87e-05	6.07e-06	4.07e-05	1.89e-05	3.85e-05	1.18e-05	0.556701	0.667113	0.227202
K21910	9.92e-06	1.65e-05	1.37e-05	4.26e-06	4.55e-06	4.28e-06	1e-05	5.44e-06	3.65e-06	1.4e-05	1.48e-05	5.67e-06	0	0	8.15e-06	6.3e-06	4.81e-06	5.92e-06	0.556237	0.666857	0.230304
K19051	0	1.32e-05	4.55e-06	8.52e-06	9.1e-06	4.28e-06	6.67e-06	1.09e-05	7.3e-06	9.37e-06	4.93e-06	5.67e-06	4.67e-06	6.07e-06	4.07e-06	6.3e-06	9.62e-06	5.92e-06	0.555845	0.666551	0.339231
K07586	8.43e-05	8.6e-05	9.56e-05	7.67e-05	9.1e-05	5.99e-05	9.01e-05	4.9e-05	0.000105809	8.9e-05	9.37e-05	9.64e-05	9.81e-05	9.71e-05	5.7e-05	9.45e-05	5.29e-05	0.000106559	0.555795	0.666551	-0.719653
K01195	9.42e-05	7.93e-05	7.28e-05	5.96e-05	6.83e-05	5.13e-05	9.34e-05	9.79e-05	8.39e-05	6.09e-05	5.92e-05	7.94e-05	7.01e-05	8.5e-05	9.37e-05	6.3e-05	9.14e-05	5.92e-05	0.555454	0.666409	0.778431
K10551	0	3.31e-06	0	4.26e-06	4.55e-06	0	3.34e-06	5.44e-06	3.65e-06	4.68e-06	4.93e-06	0	4.67e-06	6.07e-06	4.07e-06	6.3e-06	0	0	0.555181	0.666245	-0.198829
K07573	4.96e-06	1.32e-05	9.1e-06	4.26e-06	4.55e-06	4.28e-06	1.33e-05	1.09e-05	1.09e-05	4.68e-06	9.86e-06	1.7e-05	4.67e-06	1.21e-05	4.07e-06	1.26e-05	4.81e-06	1.78e-05	0.554806	0.665958	-0.298652
K08302	0.000128943	8.6e-05	6.83e-05	0.00010648	9.56e-05	8.55e-05	9.67e-05	0.000103351	0.000105809	6.56e-05	9.37e-05	0.000119123	0.000112114	7.29e-05	0.000142564	6.93e-05	9.14e-05	4.74e-05	0.554473	0.665721	0.601799
K09746	4.96e-06	6.61e-06	4.55e-06	4.26e-06	9.1e-06	8.55e-06	1e-05	1.09e-05	7.3e-06	4.68e-06	9.86e-06	1.13e-05	4.67e-06	1.82e-05	4.07e-06	1.26e-05	4.81e-06	5.92e-06	0.554037	0.665361	-0.321609
K07067	4.46e-05	4.3e-05	4.55e-05	4.69e-05	6.83e-05	9.41e-05	3.67e-05	1.09e-05	3.28e-05	4.21e-05	6.41e-05	3.97e-05	5.61e-05	3.64e-05	2.04e-05	2.52e-05	2.88e-05	5.92e-05	0.552997	0.664275	0.351078
K21064	2.48e-05	2.98e-05	9.1e-06	1.7e-05	1.82e-05	2.99e-05	2e-05	3.26e-05	2.19e-05	9.37e-06	2.47e-05	3.4e-05	1.87e-05	2.43e-05	3.26e-05	3.78e-05	1.92e-05	2.37e-05	0.552664	0.664038	-0.456219
K22026	4.96e-06	1.32e-05	4.55e-06	8.52e-06	4.55e-06	8.55e-06	1.33e-05	1.09e-05	7.3e-06	4.68e-06	9.86e-06	1.7e-05	4.67e-06	1.21e-05	4.07e-06	1.89e-05	4.81e-06	1.18e-05	0.551994	0.663395	-0.306149
K21465	3.97e-05	4.63e-05	4.55e-05	3.41e-05	3.64e-05	2.99e-05	4e-05	1.63e-05	3.28e-05	3.75e-05	3.94e-05	5.11e-05	4.2e-05	5.46e-05	1.63e-05	4.41e-05	1.44e-05	5.33e-05	0.551705	0.663211	-0.479964
K03124	4.96e-06	1.32e-05	9.1e-06	4.26e-06	4.55e-06	8.55e-06	1.33e-05	1.09e-05	7.3e-06	4.68e-06	9.86e-06	1.13e-05	9.34e-06	1.21e-05	4.07e-06	1.89e-05	4.81e-06	1.18e-05	0.551535	0.66317	-0.343004
K00863	0	1.32e-05	1.82e-05	1.7e-05	9.1e-06	0	3.34e-06	1.09e-05	3.65e-06	4.68e-06	4.93e-06	1.13e-05	4.67e-06	1.21e-05	0	6.3e-06	4.81e-06	1.18e-05	0.551211	0.662943	0.208008
K05573	9.92e-06	3.31e-06	4.55e-06	0	0	4.28e-06	6.67e-06	0	3.65e-06	0	0	5.67e-06	0	6.07e-06	0	6.3e-06	0	5.92e-06	0.550755	0.662558	0.151829
K03623	4.46e-05	7.27e-05	5.01e-05	5.96e-05	3.19e-05	7.27e-05	6.67e-05	3.81e-05	6.57e-05	5.15e-05	8.38e-05	4.54e-05	4.67e-05	7.29e-05	5.7e-05	6.3e-05	5.29e-05	6.51e-05	0.550662	0.662558	-0.652443
K08316	0.000272763	0.000297528	0.00027306	0.000251293	0.000277634	0.000273753	0.000270229	0.000250218	0.000269996	0.000248181	0.000315529	0.000232573	0.000266271	0.000230725	0.000276981	0.000283629	0.00025484	0.000272317	0.549194	0.661005	1.98749
K10008	2.48e-05	6.61e-06	0	8.52e-06	9.1e-06	4.28e-06	1e-05	1.09e-05	1.82e-05	9.37e-06	9.86e-06	5.67e-06	0	6.07e-06	4.07e-06	0	1.44e-05	2.37e-05	0.548604	0.660457	0.197027
K19710	9.92e-06	9.92e-06	9.1e-06	4.26e-06	9.1e-06	0	1e-05	1.09e-05	1.82e-05	4.68e-06	1.48e-05	5.67e-06	4.67e-06	1.82e-05	0	1.26e-05	0	5.92e-06	0.548512	0.660457	0.228424
K02589	1.98e-05	6.61e-06	9.1e-06	8.52e-06	1.82e-05	8.55e-06	1e-05	5.44e-06	1.82e-05	9.37e-06	9.86e-06	5.67e-06	9.34e-06	1.21e-05	1.22e-05	1.26e-05	1.92e-05	0	0.546833	0.658649	0.320016
K01547	9.92e-06	1.32e-05	1.82e-05	8.52e-06	4.55e-06	4.28e-06	6.67e-06	1.63e-05	3.65e-06	4.68e-06	0	0	0	1.82e-05	1.63e-05	2.52e-05	0	0	0.54653	0.658446	0.165845
K00518	0	3.31e-06	4.55e-06	0	0	0	3.34e-06	0	0	0	0	0	0	6.07e-06	0	0	0	0	0.546492	0.658446	0.0780154
K16792	0	3.31e-06	0	0	0	0	3.34e-06	0	3.65e-06	4.68e-06	0	5.67e-06	0	0	0	0	0	5.92e-06	0.546182	0.65835	-0.103296
K22481	0	3.31e-06	0	0	0	0	3.34e-06	0	3.65e-06	4.68e-06	0	5.67e-06	0	0	0	0	0	5.92e-06	0.546182	0.65835	-0.103296
K09739	4.96e-06	1.32e-05	9.1e-06	4.26e-06	4.55e-06	4.28e-06	1.33e-05	1.09e-05	1.09e-05	9.37e-06	9.86e-06	1.7e-05	4.67e-06	1.21e-05	4.07e-06	1.26e-05	4.81e-06	1.18e-05	0.545729	0.658128	-0.347375
K21313	0	0	0	4.26e-06	4.55e-06	0	0	0	0	0	0	0	4.67e-06	0	4.07e-06	0	0	5.92e-06	0.545565	0.658093	-0.0933995
K00557	9.92e-06	9.92e-06	9.1e-06	8.52e-06	4.55e-06	8.55e-06	6.67e-06	1.63e-05	3.65e-06	4.68e-06	9.86e-06	5.67e-06	9.34e-06	1.82e-05	8.15e-06	2.52e-05	4.81e-06	5.92e-06	0.545497	0.658093	-0.268662
K00077	0.000287641	0.000300833	0.000304917	0.000293885	0.000300391	0.00031225	0.000320271	0.000304613	0.000350265	0.000276277	0.000305669	0.00034035	0.000284956	0.00035216	0.000272908	0.000371869	0.000312539	0.000331516	0.545471	0.658093	-1.78978
K07029	2.98e-05	7.27e-05	3.64e-05	1.7e-05	3.64e-05	2.99e-05	1.67e-05	1.09e-05	3.28e-05	2.81e-05	3.45e-05	1.7e-05	4.67e-05	2.43e-05	3.26e-05	6.3e-06	2.4e-05	2.96e-05	0.545452	0.658093	0.310005
K00537	0.000441381	0.000406621	0.000418692	0.000396105	0.000323147	0.000414908	0.000397003	0.000407963	0.000353914	0.000416756	0.000290878	0.000289298	0.000439113	0.000303586	0.000509157	0.000334052	0.000509679	0.000278237	0.544548	0.657514	0.858046
K15449	4.96e-06	1.32e-05	4.55e-06	4.26e-06	4.55e-06	8.55e-06	1.33e-05	1.09e-05	1.09e-05	4.68e-06	9.86e-06	1.7e-05	4.67e-06	1.21e-05	4.07e-06	1.26e-05	4.81e-06	1.78e-05	0.544357	0.657446	-0.306896
K09157	0.000525689	0.000552079	0.000523365	0.000557955	0.000587127	0.000564617	0.000533785	0.000587467	0.000510803	0.000590015	0.000512735	0.00054456	0.000513855	0.000510024	0.000602842	0.000516835	0.000581803	0.000473594	0.544341	0.657446	2.3728
K16850	0	1.32e-05	1.37e-05	3.41e-05	1.37e-05	1.28e-05	2e-05	1.63e-05	1.46e-05	1.4e-05	9.86e-06	3.4e-05	2.34e-05	1.82e-05	1.63e-05	2.52e-05	1.44e-05	5.92e-06	0.543547	0.656791	-0.30796
K02596	4.96e-06	0	1.37e-05	4.26e-06	9.1e-06	0	3.34e-06	5.44e-06	0	0	4.93e-06	1.7e-05	0	6.07e-06	4.07e-06	6.3e-06	0	1.78e-05	0.542319	0.655469	-0.149234
K11062	4.96e-06	0	0	0	0	4.28e-06	0	0	0	4.68e-06	0	0	4.67e-06	6.07e-06	0	0	0	0	0.542297	0.655469	-0.0943964
K21490	0	0	0	4.26e-06	0	0	0	0	0	0	0	0	4.67e-06	0	4.07e-06	0	0	0	0.542291	0.655469	-0.0686481
K04068	0.00141837	0.00133557	0.00130159	0.00142683	0.00145644	0.00143293	0.00134114	0.00123477	0.00134998	0.00145631	0.00135086	0.00131035	0.00148084	0.00139649	0.00130344	0.00143075	0.00146653	0.00129646	0.542044	0.655469	-3.02003
K11184	0.000183495	0.000125623	0.000109224	0.000132035	0.000127438	0.000166819	0.000103421	0.000152306	0.000134998	0.000107701	8.87e-05	0.000119123	0.000177514	7.29e-05	0.000207736	5.67e-05	0.000182715	0.000112479	0.541692	0.655358	0.510214
K10117	0.00052073	0.000416539	0.000496059	0.000630361	0.000623538	0.000453404	0.000580491	0.00066906	0.000550938	0.000505727	0.000586687	0.000652338	0.000471813	0.000673961	0.000586548	0.000567258	0.000557762	0.000538713	0.541155	0.654871	-1.20107
K19507	1.49e-05	6.61e-06	4.55e-06	1.28e-05	0	4.28e-06	1e-05	1.09e-05	1.09e-05	4.68e-06	4.93e-06	5.67e-06	1.4e-05	0	1.63e-05	0	9.62e-06	5.92e-06	0.540844	0.654657	0.234562
K07267	4.96e-06	3.31e-06	1.82e-05	0	4.55e-06	4.28e-06	6.67e-06	5.44e-06	7.3e-06	0	9.86e-06	5.67e-06	0	3.04e-05	0	1.26e-05	4.81e-06	1.18e-05	0.540395	0.654275	-0.151761
K00401	4.96e-06	6.61e-06	4.55e-06	4.26e-06	4.55e-06	8.55e-06	1e-05	1.09e-05	7.3e-06	4.68e-06	9.86e-06	1.13e-05	4.67e-06	6.07e-06	4.07e-06	1.26e-05	4.81e-06	1.18e-05	0.539425	0.653262	-0.385785
K18198	4.96e-06	6.61e-06	4.55e-06	0	4.55e-06	1.28e-05	3.34e-06	0	3.65e-06	0	9.86e-06	5.67e-06	4.67e-06	0	4.07e-06	6.3e-06	0	0	0.538197	0.651936	0.173333
K21949	0	0	0	0	0	4.28e-06	0	0	0	0	0	0	0	0	4.07e-06	0	4.81e-06	0	0.536879	0.6505	-0.0694887
K02931	0.00127455	0.0011835	0.00119236	0.0011585	0.00119246	0.00114207	0.00114097	0.0010607	0.00111282	0.00122217	0.00117337	0.00116286	0.00121924	0.00126292	0.00106719	0.00115973	0.00114437	0.00120174	0.536248	0.649897	-3.29775
K14981	0	0	4.55e-06	0	4.55e-06	0	3.34e-06	0	3.65e-06	0	4.93e-06	0	0	6.07e-06	0	6.3e-06	0	5.92e-06	0.536247	0.649897	-0.134326
K08358	0	3.31e-06	0	8.52e-06	4.55e-06	4.28e-06	3.34e-06	5.44e-06	3.65e-06	4.68e-06	0	0	9.34e-06	0	0	0	4.81e-06	5.92e-06	0.535591	0.649422	0.169507
K07161	5.95e-05	3.64e-05	7.74e-05	6.81e-05	5.92e-05	5.56e-05	6.34e-05	5.98e-05	3.28e-05	5.62e-05	6.9e-05	4.54e-05	3.27e-05	4.25e-05	6.52e-05	3.78e-05	7.21e-05	5.33e-05	0.535553	0.649422	0.634565
K09937	4.96e-06	3.31e-06	0	0	0	4.28e-06	3.34e-06	1.09e-05	3.65e-06	4.68e-06	0	0	0	6.07e-06	0	6.3e-06	4.81e-06	0	0.534906	0.648913	0.149479
K22226	9.92e-06	1.65e-05	4.55e-06	8.52e-06	9.1e-06	4.28e-06	6.67e-06	2.18e-05	1.09e-05	9.37e-06	9.86e-06	1.13e-05	4.67e-06	1.82e-05	8.15e-06	2.52e-05	9.62e-06	1.18e-05	0.533597	0.647485	-0.310468
K09721	4.96e-06	1.32e-05	9.1e-06	4.26e-06	4.55e-06	8.55e-06	1e-05	1.09e-05	1.46e-05	9.37e-06	9.86e-06	1.7e-05	4.67e-06	1.21e-05	4.07e-06	1.26e-05	4.81e-06	1.78e-05	0.532989	0.646909	-0.350904
K08738	4.96e-06	0	0	4.26e-06	4.55e-06	0	3.34e-06	1.09e-05	3.65e-06	9.37e-06	4.93e-06	0	4.67e-06	1.21e-05	0	6.3e-06	4.81e-06	0	0.531787	0.64561	-0.174733
K16214	2.48e-05	3.31e-06	1.37e-05	0	1.37e-05	2.14e-05	1.33e-05	5.44e-06	2.19e-05	2.81e-05	1.97e-05	5.67e-06	0	1.21e-05	0	6.3e-06	9.62e-06	1.18e-05	0.530211	0.643856	0.217998
K00850	0.000763737	0.000829771	0.000791874	0.000792211	0.000755528	0.000787041	0.000783997	0.000854003	0.000868366	0.000819465	0.000828264	0.000816841	0.000798812	0.000680033	0.000822797	0.000680709	0.000884726	0.000739991	0.530184	0.643856	2.31582
K02914	0.000644713	0.000654561	0.000614385	0.000660176	0.000628089	0.00073999	0.000617189	0.00066906	0.00059837	0.000641524	0.000680359	0.000675028	0.000696041	0.000649674	0.000659867	0.000636589	0.000596228	0.000692631	0.529196	0.642942	-2.92171
K03236	4.96e-06	1.32e-05	1.37e-05	8.52e-06	4.55e-06	8.55e-06	1e-05	1.09e-05	1.82e-05	9.37e-06	1.48e-05	1.13e-05	4.67e-06	2.43e-05	4.07e-06	1.26e-05	4.81e-06	2.37e-05	0.528739	0.642547	-0.299755
K07661	0	3.31e-06	4.55e-06	0	0	4.28e-06	0	5.44e-06	3.65e-06	9.37e-06	0	5.67e-06	0	0	0	0	9.62e-06	5.92e-06	0.527694	0.641436	-0.140679
K21021	0	0	0	0	0	1.28e-05	0	0	0	4.68e-06	0	5.67e-06	4.67e-06	0	8.15e-06	0	0	0	0.526735	0.640429	-0.0884669
K14392	1.49e-05	1.98e-05	2.28e-05	3.41e-05	2.73e-05	2.14e-05	1.33e-05	2.72e-05	1.09e-05	1.87e-05	1.48e-05	1.7e-05	2.34e-05	3.64e-05	2.85e-05	3.15e-05	2.4e-05	1.78e-05	0.526272	0.640025	-0.505959
K01712	0.000109105	0.000112399	0.000109224	9.37e-05	8.65e-05	9.84e-05	0.000100085	0.000141427	9.85e-05	0.000103018	0.000113393	7.94e-05	0.000121457	0.000103219	9.37e-05	8.82e-05	0.000100974	0.000106559	0.526191	0.640025	1.20607
K13014	0	0	4.55e-06	0	0	0	3.34e-06	0	3.65e-06	0	0	0	0	6.07e-06	0	0	0	0	0.525515	0.639423	0.0825884
K00320	0	3.31e-06	9.1e-06	0	0	0	3.34e-06	0	3.65e-06	0	0	5.67e-06	0	0	0	0	0	5.92e-06	0.525501	0.639423	0.1018
K02910	4.96e-06	1.32e-05	9.1e-06	4.26e-06	4.55e-06	4.28e-06	1.33e-05	1.09e-05	1.46e-05	9.37e-06	9.86e-06	1.7e-05	4.67e-06	1.82e-05	4.07e-06	1.26e-05	4.81e-06	1.18e-05	0.524854	0.638936	-0.333653
K03532	9.92e-06	6.61e-06	9.1e-06	8.52e-06	9.1e-06	4.28e-06	6.67e-06	1.09e-05	3.65e-06	1.4e-05	0	0	1.4e-05	1.21e-05	8.15e-06	1.26e-05	1.44e-05	5.92e-06	0.524584	0.638766	-0.311037
K01170	4.96e-06	1.32e-05	9.1e-06	4.26e-06	4.55e-06	4.28e-06	1.33e-05	1.09e-05	1.46e-05	9.37e-06	9.86e-06	1.7e-05	4.67e-06	1.21e-05	4.07e-06	1.89e-05	4.81e-06	1.18e-05	0.523932	0.638131	-0.330515
K05524	2.98e-05	2.98e-05	2.28e-05	1.28e-05	1.82e-05	8.55e-06	1e-05	1.63e-05	2.19e-05	1.4e-05	1.97e-05	5.67e-06	9.34e-06	2.43e-05	2.04e-05	1.89e-05	1.44e-05	2.37e-05	0.523791	0.638118	0.420024
K07115	2.48e-05	9.92e-06	3.64e-05	1.28e-05	1.82e-05	1.71e-05	2.67e-05	1.63e-05	2.55e-05	9.37e-06	2.96e-05	1.7e-05	4.67e-06	3.04e-05	1.22e-05	3.15e-05	9.62e-06	1.78e-05	0.523788	0.638118	0.35406
K14983	9.92e-06	1.32e-05	9.1e-06	8.52e-06	1.37e-05	2.57e-05	1.33e-05	1.09e-05	1.09e-05	2.34e-05	2.47e-05	5.67e-06	1.87e-05	1.21e-05	8.15e-06	1.26e-05	4.81e-06	2.37e-05	0.523199	0.637715	-0.347516
K03316	1.49e-05	3.31e-06	9.1e-06	1.7e-05	1.82e-05	4.28e-06	1.33e-05	0	1.82e-05	1.4e-05	1.97e-05	1.7e-05	1.4e-05	1.21e-05	0	1.26e-05	1.44e-05	1.18e-05	0.523178	0.637715	-0.320532
K06182	0.000153739	0.000161987	0.000141081	0.000174627	0.000191158	0.00019676	0.000156799	0.000217581	0.000175133	0.000107701	0.000133114	0.000153158	0.000214885	0.000151793	0.000264761	0.000119754	0.000192332	0.000118399	0.522805	0.637551	0.695798
K10747	3.97e-05	5.29e-05	6.37e-05	4.69e-05	5.46e-05	5.99e-05	8.34e-05	3.81e-05	7.66e-05	7.96e-05	4.44e-05	5.67e-05	4.67e-05	0.000109291	4.07e-05	0.000100846	3.85e-05	5.92e-05	0.522511	0.637351	-0.472421
K02013	0.000867883	0.000895888	0.000928404	0.000971097	0.000832901	0.000945305	0.000957477	0.00109878	0.000959581	0.000870974	0.000995888	0.000930291	0.000887568	0.00122042	0.000977581	0.00121645	0.000855876	0.00082879	0.52154	0.636326	-1.38042
K03105	4.96e-06	1.32e-05	9.1e-06	4.26e-06	4.55e-06	8.55e-06	1.33e-05	1.09e-05	1.09e-05	4.68e-06	9.86e-06	1.7e-05	4.67e-06	1.82e-05	4.07e-06	1.26e-05	4.81e-06	1.78e-05	0.521153	0.636012	-0.325106
K04484	4.96e-06	1.32e-05	9.1e-06	4.26e-06	4.55e-06	8.55e-06	1.33e-05	1.09e-05	1.09e-05	4.68e-06	9.86e-06	1.7e-05	4.67e-06	1.82e-05	4.07e-06	1.26e-05	4.81e-06	1.78e-05	0.521153	0.636012	-0.325106
K12507	9.92e-06	0	0	4.26e-06	0	0	3.34e-06	1.63e-05	7.3e-06	0	9.86e-06	0	4.67e-06	0	8.15e-06	0	4.81e-06	0	0.520987	0.636012	0.131941
K06285	2.98e-05	2.64e-05	2.28e-05	1.7e-05	1.37e-05	2.57e-05	1.67e-05	2.18e-05	1.09e-05	2.34e-05	4.93e-06	0	1.87e-05	1.82e-05	2.85e-05	1.26e-05	4.33e-05	5.92e-06	0.520972	0.636012	0.305015
K07056	0.00126463	0.00123309	0.00126063	0.00126072	0.00130624	0.00122761	0.00120102	0.00120213	0.00124782	0.00118003	0.00124733	0.00128199	0.00126595	0.00123256	0.00121383	0.00124166	0.00122131	0.00123135	0.520285	0.635587	6.67828
K02538	0	3.31e-06	0	0	4.55e-06	4.28e-06	0	0	0	0	0	0	4.67e-06	6.07e-06	0	0	9.62e-06	0	0.519925	0.635305	-0.104156
K07795	4.96e-06	6.61e-06	9.1e-06	8.52e-06	4.55e-06	8.55e-06	1e-05	1.09e-05	7.3e-06	1.4e-05	4.93e-06	0	9.34e-06	6.07e-06	4.07e-06	0	9.62e-06	1.18e-05	0.519192	0.634568	0.32317
K00400	4.96e-06	1.65e-05	9.1e-06	4.26e-06	4.55e-06	8.55e-06	1.33e-05	1.09e-05	1.09e-05	9.37e-06	9.86e-06	2.27e-05	4.67e-06	1.21e-05	4.07e-06	1.26e-05	4.81e-06	1.78e-05	0.51899	0.63448	-0.320138
K01497	9.92e-06	6.61e-06	1.82e-05	4.26e-06	4.55e-06	8.55e-06	3.34e-06	0	1.09e-05	9.37e-06	0	1.13e-05	0	1.21e-05	8.15e-06	6.3e-06	4.81e-06	0	0.518383	0.633896	0.219636
K07307	3.97e-05	4.63e-05	3.64e-05	3.41e-05	1.37e-05	3.42e-05	2.67e-05	4.9e-05	2.19e-05	6.56e-05	5.42e-05	2.84e-05	2.34e-05	2.43e-05	1.63e-05	4.41e-05	4.33e-05	4.14e-05	0.517688	0.633205	-0.438938
K03656	4.96e-06	0	1.82e-05	4.26e-06	4.55e-06	4.28e-06	3.34e-06	5.44e-06	3.65e-06	4.68e-06	0	5.67e-06	0	6.07e-06	4.07e-06	6.3e-06	4.81e-06	5.92e-06	0.517457	0.63308	0.20586
K04021	0	6.61e-06	9.1e-06	0	0	0	3.34e-06	5.44e-06	0	4.68e-06	4.93e-06	5.67e-06	0	6.07e-06	0	6.3e-06	0	5.92e-06	0.515037	0.630276	-0.172371
K02838	0.0011704	0.00119672	0.00123332	0.00117128	0.00120156	0.00116773	0.00113763	0.00107702	0.00112742	0.00112384	0.00117337	0.00112316	0.0011772	0.00104434	0.00107534	0.00115973	0.00113957	0.00129646	0.514697	0.630018	3.30115
K05982	9.92e-06	2.64e-05	1.37e-05	2.56e-05	2.73e-05	2.99e-05	1.67e-05	1.09e-05	7.3e-06	1.4e-05	1.97e-05	1.13e-05	4.67e-06	2.43e-05	2.04e-05	2.52e-05	1.44e-05	1.18e-05	0.514578	0.630018	0.38583
K02892	0.00124479	0.0013521	0.00124697	0.00121813	0.00132445	0.00126183	0.00123104	0.00118037	0.00127336	0.00127837	0.001341	0.00120824	0.00125661	0.00125077	0.00113236	0.00122906	0.00120688	0.00127278	0.513576	0.62896	3.89207
K20480	0	6.61e-06	0	4.26e-06	0	0	3.34e-06	0	0	0	0	0	0	6.07e-06	0	1.26e-05	0	5.92e-06	0.513069	0.628497	-0.101698
K02798	2.48e-05	1.65e-05	2.28e-05	2.13e-05	1.82e-05	2.14e-05	6.67e-06	4.35e-05	1.46e-05	4.68e-06	1.48e-05	2.84e-05	4.67e-06	1.82e-05	4.07e-05	6.3e-06	9.62e-06	2.96e-05	0.512011	0.627358	0.28904
K09973	7.44e-05	5.29e-05	5.92e-05	4.69e-05	7.28e-05	7.7e-05	5.34e-05	9.79e-05	4.38e-05	3.75e-05	4.44e-05	7.37e-05	5.61e-05	7.89e-05	5.7e-05	8.19e-05	4.81e-05	5.33e-05	0.511897	0.627358	0.640163
K13926	0	3.31e-06	0	0	0	0	3.34e-06	0	3.65e-06	0	0	0	4.67e-06	6.07e-06	0	6.3e-06	0	0	0.51189	0.627358	-0.110972
K09955	0.000411625	0.000446291	0.000414141	0.000391846	0.000436932	0.000393521	0.00046039	0.000527633	0.000529046	0.000435487	0.000404271	0.000510525	0.000378384	0.000364303	0.000529523	0.000390778	0.000476021	0.000355196	0.511623	0.627353	1.28902
K07158	4.96e-06	1.32e-05	4.55e-06	4.26e-06	4.55e-06	8.55e-06	1e-05	1.09e-05	7.3e-06	9.37e-06	4.93e-06	1.7e-05	4.67e-06	1.21e-05	4.07e-06	6.3e-06	4.81e-06	1.78e-05	0.5111	0.626869	-0.320821
K11066	9.92e-06	9.92e-06	0	4.26e-06	4.55e-06	4.28e-06	1.33e-05	1.09e-05	1.09e-05	4.68e-06	1.48e-05	5.67e-06	4.67e-06	6.07e-06	4.07e-06	6.3e-06	4.81e-06	5.92e-06	0.510876	0.626751	0.311272
K18991	0	6.61e-06	0	4.26e-06	4.55e-06	0	0	5.44e-06	0	0	0	0	4.67e-06	0	4.07e-06	0	4.81e-06	0	0.510604	0.626575	0.129553
K09730	4.96e-06	9.92e-06	4.55e-06	4.26e-06	4.55e-06	4.28e-06	6.67e-06	1.09e-05	1.82e-05	4.68e-06	9.86e-06	1.13e-05	4.67e-06	1.21e-05	4.07e-06	1.26e-05	4.81e-06	1.78e-05	0.510254	0.626302	-0.304413
K18197	5.95e-05	6.28e-05	6.37e-05	6.81e-05	7.74e-05	5.56e-05	5e-05	8.7e-05	5.84e-05	2.34e-05	4.93e-05	3.97e-05	4.2e-05	0.000133578	6.52e-05	9.45e-05	3.37e-05	2.37e-05	0.510048	0.626207	0.387616
K00413	0	3.31e-06	4.55e-06	4.26e-06	4.55e-06	0	6.67e-06	0	3.65e-06	9.37e-06	0	0	4.67e-06	6.07e-06	4.07e-06	6.3e-06	4.81e-06	0	0.510006	0.626207	-0.207092
K02614	0.000168617	0.000221493	0.000200244	0.000174627	0.00013199	0.00019676	0.000213514	0.000168625	0.000189727	0.000187306	0.000172555	0.000198538	0.000168171	0.000151793	0.000183296	0.000182783	0.000153865	0.000201278	0.508988	0.625219	1.37162
K03051	4.96e-06	9.92e-06	1.37e-05	4.26e-06	4.55e-06	8.55e-06	1.67e-05	1.09e-05	1.09e-05	4.68e-06	4.93e-06	1.7e-05	4.67e-06	6.07e-06	4.07e-06	6.3e-06	4.81e-06	1.78e-05	0.508783	0.625123	0.304457
K14059	0.000109105	7.27e-05	5.46e-05	5.11e-05	0.000104682	0.000102658	8.67e-05	4.9e-05	6.57e-05	9.37e-05	8.87e-05	6.81e-05	4.2e-05	7.29e-05	5.3e-05	8.19e-05	8.17e-05	5.33e-05	0.508023	0.624347	0.60858
K03497	0.00242511	0.00255874	0.00236652	0.0025683	0.00251691	0.00255788	0.00232864	0.00237707	0.00235699	0.00258014	0.00237633	0.00246187	0.00251789	0.00217975	0.00231361	0.00232576	0.00253397	0.00243901	0.507719	0.62413	3.72547
K19810	0	6.61e-06	9.1e-06	4.26e-06	4.55e-06	4.28e-06	3.34e-06	5.44e-06	3.65e-06	0	4.93e-06	5.67e-06	4.67e-06	6.07e-06	0	6.3e-06	0	5.92e-06	0.507106	0.623533	0.272771
K20450	0	0	4.55e-06	4.26e-06	0	4.28e-06	3.34e-06	0	3.65e-06	4.68e-06	4.93e-06	0	0	0	4.07e-06	0	0	0	0.506453	0.622886	0.148009
K18195	9.92e-06	3.31e-06	4.55e-06	4.26e-06	4.55e-06	1.28e-05	0	2.18e-05	0	4.68e-06	9.86e-06	5.67e-06	4.67e-06	6.07e-06	8.15e-06	6.3e-06	0	0	0.506096	0.622604	0.189722
K22318	4.96e-06	6.61e-06	4.55e-06	4.26e-06	4.55e-06	0	6.67e-06	5.44e-06	3.65e-06	4.68e-06	4.93e-06	5.67e-06	4.67e-06	1.21e-05	0	1.26e-05	0	5.92e-06	0.506084	0.622604	-0.259616
K02303	4.96e-06	1.32e-05	2.28e-05	8.52e-06	4.55e-06	8.55e-06	1.67e-05	1.09e-05	1.09e-05	4.68e-06	9.86e-06	1.7e-05	9.34e-06	1.21e-05	4.07e-06	1.26e-05	4.81e-06	1.18e-05	0.504655	0.621143	0.357655
K02086	4.96e-05	7.6e-05	8.19e-05	6.39e-05	7.74e-05	5.56e-05	5.67e-05	4.9e-05	6.57e-05	7.02e-05	6.9e-05	7.94e-05	8.88e-05	7.29e-05	2.44e-05	8.19e-05	3.37e-05	0.000118399	0.504053	0.620559	-0.547828
K19166	2.48e-05	2.98e-05	3.19e-05	2.56e-05	4.1e-05	3.42e-05	2.34e-05	3.81e-05	1.82e-05	4.68e-06	3.45e-05	5.67e-06	2.8e-05	4.25e-05	2.44e-05	5.67e-05	1.44e-05	1.78e-05	0.503903	0.620529	0.366947
K03322	3.47e-05	2.98e-05	2.28e-05	1.7e-05	2.28e-05	1.71e-05	1.67e-05	3.26e-05	2.55e-05	1.87e-05	2.96e-05	2.27e-05	1.4e-05	3.64e-05	2.44e-05	4.41e-05	2.88e-05	2.37e-05	0.503875	0.620529	-0.559899
K03422	4.96e-06	6.61e-06	1.37e-05	4.26e-06	4.55e-06	8.55e-06	1e-05	1.09e-05	7.3e-06	9.37e-06	9.86e-06	1.13e-05	4.67e-06	1.21e-05	4.07e-06	1.26e-05	4.81e-06	1.18e-05	0.502781	0.61946	-0.443192
K07246	9.92e-06	1.98e-05	1.82e-05	1.28e-05	4.55e-06	1.28e-05	1.67e-05	1.09e-05	1.46e-05	9.37e-06	2.47e-05	1.7e-05	1.4e-05	2.43e-05	1.22e-05	1.26e-05	9.62e-06	1.18e-05	0.502735	0.61946	-0.476737
K17195	4.96e-06	1.98e-05	1.82e-05	2.13e-05	1.37e-05	8.55e-06	1e-05	5.44e-06	1.46e-05	1.4e-05	9.86e-06	1.13e-05	4.67e-06	1.82e-05	1.22e-05	1.89e-05	4.81e-06	5.92e-06	0.502466	0.619383	0.370591
K00075	0.00102162	0.00108763	0.00103763	0.00102647	0.00105592	0.00102658	0.000987503	0.000941036	0.00101066	0.00103487	0.00105505	0.00110047	0.00106041	0.000977547	0.00102239	0.000983247	0.00102897	0.00104783	0.502404	0.619383	-4.5712
K00566	0.00108113	0.00111738	0.00109224	0.00103924	0.00108778	0.00110785	0.0011076	0.000989991	0.00107999	0.00112852	0.00106491	0.00106643	0.00106975	0.00109291	0.00106719	0.00107779	0.00107225	0.00117807	0.501548	0.618563	-4.88842
K08317	1.49e-05	0	4.55e-06	0	4.55e-06	0	3.34e-06	0	7.3e-06	4.68e-06	4.93e-06	0	0	0	0	0	0	1.18e-05	0.501536	0.618563	0.121605
K00754	4.96e-05	1.98e-05	5.01e-05	8.52e-06	1.82e-05	1.71e-05	1e-05	2.72e-05	1.82e-05	2.81e-05	1.48e-05	1.7e-05	1.87e-05	6.07e-06	4.48e-05	1.89e-05	1.92e-05	1.18e-05	0.500423	0.617486	0.291876
K02291	4.96e-06	0	1.37e-05	4.26e-06	4.55e-06	0	6.67e-06	0	3.65e-06	0	4.93e-06	5.67e-06	4.67e-06	1.21e-05	0	1.26e-05	4.81e-06	5.92e-06	0.496728	0.613082	-0.201137
K01485	2.98e-05	1.98e-05	1.82e-05	2.13e-05	2.28e-05	2.99e-05	2.67e-05	2.18e-05	2.55e-05	1.4e-05	4.93e-06	2.84e-05	9.34e-06	2.43e-05	1.22e-05	3.15e-05	1.44e-05	4.74e-05	0.496503	0.612959	0.40288
K02385	9.42e-05	9.26e-05	7.28e-05	9.8e-05	0.000118336	0.000136877	0.00013011	0.000141427	0.000145944	7.96e-05	8.87e-05	0.000102105	9.81e-05	9.71e-05	0.00017515	0.00013236	9.62e-05	7.7e-05	0.496329	0.612899	0.691936
K01113	0	3.31e-06	0	4.26e-06	4.55e-06	0	3.34e-06	5.44e-06	3.65e-06	4.68e-06	0	0	0	6.07e-06	0	6.3e-06	0	0	0.496068	0.61273	0.163256
K01678	0.000451299	0.000492573	0.000391386	0.000451475	0.000405072	0.000461959	0.000463726	0.000489556	0.000477966	0.000412074	0.000483154	0.0004538	0.000485827	0.000394662	0.000521376	0.000390778	0.000432746	0.000384795	0.495728	0.612465	1.88501
K11691	9.92e-06	1.98e-05	4.55e-06	2.56e-05	1.37e-05	8.55e-06	1e-05	0	7.3e-06	1.4e-05	2.47e-05	1.7e-05	9.34e-06	1.82e-05	8.15e-06	1.89e-05	4.81e-06	5.92e-06	0.49499	0.611709	-0.301863
K03086	0.00182999	0.00159012	0.00169752	0.0015759	0.00174773	0.00156125	0.00168476	0.00156114	0.00171849	0.00163893	0.0017502	0.00166772	0.00169572	0.0017183	0.00159672	0.00173959	0.00174541	0.00164574	0.494031	0.610677	-3.87244
K20922	1.49e-05	6.61e-06	4.55e-06	1.28e-05	1.37e-05	4.28e-06	1.33e-05	5.44e-06	1.09e-05	4.68e-06	9.86e-06	1.13e-05	4.67e-06	1.21e-05	4.07e-06	1.26e-05	9.62e-06	5.92e-06	0.493878	0.610642	0.411258
K03629	0.00110097	0.00111077	0.00107859	0.00109036	0.00109688	0.00113351	0.00104088	0.000979112	0.0010508	0.00113788	0.00109449	0.00108912	0.00109778	0.00112934	0.00103868	0.00105258	0.00103859	0.00113071	0.493235	0.610001	-4.56476
K03723	0.000778615	0.000760348	0.000778221	0.000762396	0.000819247	0.000748545	0.000730619	0.000696258	0.000685936	0.0008101	0.000729661	0.000765788	0.000784797	0.000771108	0.000716893	0.000731132	0.000745285	0.00082287	0.493229	0.610001	-3.46226
K00814	4.96e-06	3.31e-06	4.55e-06	0	0	0	3.34e-06	1.09e-05	3.65e-06	4.68e-06	4.93e-06	5.67e-06	0	0	0	1.89e-05	4.81e-06	5.92e-06	0.493176	0.610001	-0.158824
K04096	0.00103154	0.00102151	0.00100122	0.00105202	0.00107868	0.00108218	0.00101419	0.00089208	0.00100336	0.00111915	0.00115365	0.00101538	0.00105574	0.000983619	0.000973508	0.000939127	0.0010434	0.00108335	0.492709	0.609813	-2.91486
K02962	4.96e-06	1.65e-05	4.55e-06	8.52e-06	9.1e-06	8.55e-06	1e-05	1.09e-05	1.46e-05	4.68e-06	9.86e-06	1.7e-05	4.67e-06	1.82e-05	4.07e-06	1.89e-05	4.81e-06	2.37e-05	0.49263	0.609813	-0.317816
K11076	4.96e-06	6.61e-06	9.1e-06	8.52e-06	9.1e-06	8.55e-06	0	5.44e-06	0	4.68e-06	0	5.67e-06	0	1.21e-05	4.07e-06	1.26e-05	0	0	0.491997	0.609239	0.208253
K12506	0.000143821	0.000185128	0.00018204	0.000149072	0.000150195	0.000128322	0.000153463	0.000163185	0.000167835	0.000173258	0.000162695	0.000187193	0.000121457	0.000163936	0.000101831	0.000151269	0.000125016	0.000165758	0.491953	0.609239	1.17821
K00840	0	0	0	0	0	0	0	5.44e-06	0	0	0	0	0	6.07e-06	0	6.3e-06	0	0	0.490822	0.608092	-0.0774728
K07487	1.49e-05	6.61e-06	1.82e-05	1.7e-05	2.28e-05	1.28e-05	1.33e-05	5.44e-06	1.46e-05	9.37e-06	1.97e-05	1.7e-05	1.87e-05	1.21e-05	1.22e-05	2.52e-05	9.62e-06	1.78e-05	0.490251	0.607539	-0.503738
K02568	4.96e-06	6.61e-06	9.1e-06	8.52e-06	9.1e-06	8.55e-06	1e-05	1.09e-05	1.46e-05	1.4e-05	4.93e-06	5.67e-06	4.67e-06	6.07e-06	8.15e-06	1.26e-05	1.44e-05	0	0.48982	0.607159	0.390556
K01623	9.92e-06	1.32e-05	1.37e-05	1.7e-05	2.28e-05	4.28e-05	1.33e-05	5.44e-06	2.55e-05	3.75e-05	2.47e-05	1.7e-05	2.34e-05	2.43e-05	0	3.15e-05	9.62e-06	2.96e-05	0.489301	0.606669	-0.322917
K19424	0.000119024	8.93e-05	0.000113775	0.000114998	0.000122887	8.13e-05	0.000120102	0.000103351	0.000113106	0.000121749	0.000118323	0.000124795	0.000102771	9.71e-05	0.000101831	9.45e-05	0.000129824	0.000130238	0.489277	0.606669	-1.40186
K19056	0	6.61e-06	4.55e-06	0	0	0	0	0	0	0	0	0	0	0	0	0	4.81e-06	0	0.487985	0.605343	0.0767956
K01056	0.00126959	0.00128929	0.00121057	0.00120961	0.00118336	0.00126183	0.00127108	0.0011151	0.00123323	0.00128305	0.00128677	0.00127064	0.0012753	0.00122042	0.00112829	0.00119754	0.00124535	0.00130238	0.486947	0.60421	-4.11048
K19068	0.000257885	0.000224799	0.000232101	0.000217219	0.000268531	0.000278031	0.000233531	0.000239339	0.000269996	0.000252863	0.000246507	0.000266608	0.000266271	0.000224654	0.000256615	0.000189086	0.000307731	0.000301916	0.48684	0.60421	-1.53225
K03557	0	0	4.55e-06	4.26e-06	0	0	0	5.44e-06	3.65e-06	4.68e-06	0	0	4.67e-06	6.07e-06	4.07e-06	6.3e-06	0	0	0.486559	0.604034	-0.170181
K09165	1.49e-05	9.92e-06	1.82e-05	3.41e-05	3.64e-05	3.42e-05	2.34e-05	0	1.09e-05	9.37e-06	3.45e-05	1.7e-05	9.34e-06	1.82e-05	1.22e-05	1.26e-05	4.81e-06	2.96e-05	0.485719	0.603145	0.295619
K14982	9.92e-06	6.61e-06	9.1e-06	8.52e-06	1.82e-05	2.99e-05	1e-05	5.44e-06	1.09e-05	2.34e-05	1.97e-05	1.13e-05	1.87e-05	1.21e-05	4.07e-06	1.26e-05	9.62e-06	1.78e-05	0.485703	0.603145	-0.354545
K15874	0	0	0	0	0	4.28e-06	0	0	0	0	0	0	0	0	4.07e-06	0	0	5.92e-06	0.485349	0.60299	-0.0772264
K03059	0	0	0	0	0	4.28e-06	6.67e-06	5.44e-06	3.65e-06	0	4.93e-06	5.67e-06	0	6.07e-06	0	6.3e-06	0	5.92e-06	0.485253	0.60299	-0.170921
K05520	1.98e-05	1.98e-05	1.82e-05	2.13e-05	1.82e-05	2.57e-05	1.33e-05	2.18e-05	2.19e-05	1.87e-05	1.48e-05	2.84e-05	1.4e-05	3.64e-05	1.63e-05	3.78e-05	2.4e-05	1.18e-05	0.484615	0.602385	-0.533767
K01815	0.00022317	0.000234716	0.000209346	0.000234256	0.000259428	0.000205315	0.000233531	0.000320931	0.000226213	0.000154528	0.000226786	0.0002269	0.000252256	0.00021251	0.000289201	0.000258417	0.000201948	0.000213117	0.483714	0.601418	1.17043
K00605	0.000233089	0.000201658	0.000241203	0.000178886	0.000159298	0.000162541	0.000213514	0.000250218	0.000229862	0.000220085	0.000241577	0.000232573	0.000172842	0.00024894	0.000158857	0.000271023	0.000182715	0.000254557	0.482921	0.600584	-1.0663
K11312	9.92e-06	9.92e-06	9.1e-06	0	0	0	0	5.44e-06	7.3e-06	0	4.93e-06	0	0	1.21e-05	0	6.3e-06	4.81e-06	0	0.48238	0.600063	0.161489
K01621	9.42e-05	7.93e-05	5.01e-05	8.52e-05	9.1e-05	7.7e-05	8.01e-05	5.98e-05	9.12e-05	8.43e-05	9.86e-05	7.37e-05	8.41e-05	0.000115363	4.89e-05	0.000126057	3.37e-05	0.000118399	0.482009	0.599754	-0.621817
K08280	4.96e-06	9.92e-06	4.55e-06	1.28e-05	1.37e-05	8.55e-06	1e-05	1.09e-05	1.46e-05	9.37e-06	0	5.67e-06	9.34e-06	6.07e-06	1.22e-05	0	2.4e-05	5.92e-06	0.481802	0.59965	0.293156
K03791	0	3.31e-06	4.55e-06	0	4.55e-06	4.28e-06	3.34e-06	1.63e-05	7.3e-06	4.68e-06	4.93e-06	5.67e-06	0	2.43e-05	0	1.26e-05	4.81e-06	5.92e-06	0.481226	0.599084	-0.173956
K05567	9.92e-05	0.000119011	0.000122877	0.00016185	0.000118336	0.000132599	0.000126774	0.000163185	0.000145944	9.83e-05	0.000128184	0.00013614	0.000149485	0.000127506	0.000138491	0.000126057	0.000110591	0.000118399	0.481207	0.599084	1.29156
K05942	0.000138861	0.000201658	0.000191142	0.00021296	0.000154747	0.000209592	0.000210178	0.000212141	0.000197024	0.000206037	0.000167625	0.00020421	0.000182185	0.000151793	0.000228102	0.000170177	0.000192332	0.000142078	0.480759	0.598809	1.27023
K03439	0.000996826	0.00100168	0.00095571	0.000975356	0.00100585	0.00105224	0.00093746	0.000957354	0.00100336	0.0011332	0.00101068	0.000930291	0.00104173	0.000971475	0.000981654	0.00098955	0.00104821	0.000935348	0.480754	0.598809	-3.61861
K20939	0	0	0	4.26e-06	4.55e-06	0	3.34e-06	0	0	0	9.86e-06	5.67e-06	0	0	0	0	0	5.92e-06	0.479854	0.597985	-0.114436
K03315	0.000188455	0.00024794	0.000236652	0.00016185	0.00013199	0.000162541	0.000226859	0.00022846	0.000218916	0.000248181	0.000192275	0.00024959	0.000210214	0.000206438	0.000207736	0.0002206	0.000187523	0.000183518	0.479618	0.597843	-1.14857
K03703	0.000853005	0.000922335	0.000878343	0.000890172	0.000905723	0.000902531	0.000890754	0.000864883	0.000850123	0.000941214	0.000912076	0.000805496	0.000878226	0.00081361	0.000855383	0.00085719	0.000855876	0.000923509	0.479589	0.597843	4.34612
K03567	9.92e-06	9.92e-06	9.1e-06	4.26e-06	4.55e-06	4.28e-06	3.34e-06	1.63e-05	3.65e-06	4.68e-06	0	5.67e-06	9.34e-06	6.07e-06	4.07e-06	1.26e-05	4.81e-06	5.92e-06	0.479324	0.597781	0.309348
K17950	0	3.31e-06	4.55e-06	4.26e-06	0	0	6.67e-06	0	0	0	4.93e-06	0	0	6.07e-06	0	0	0	0	0.479233	0.597781	0.121464
K06401	9.92e-06	2.31e-05	1.82e-05	1.28e-05	1.37e-05	4.28e-06	1.33e-05	1.09e-05	1.09e-05	9.37e-06	1.48e-05	2.27e-05	9.34e-06	3.04e-05	0	2.52e-05	0	3.55e-05	0.478685	0.597288	-0.27868
K17248	4.96e-06	0	1.82e-05	4.26e-06	9.1e-06	4.28e-06	3.34e-06	1.09e-05	3.65e-06	4.68e-06	0	0	4.67e-06	1.21e-05	4.07e-06	1.26e-05	4.81e-06	0	0.478641	0.597288	0.205347
K10120	1.49e-05	9.92e-06	9.1e-06	2.98e-05	4.1e-05	3.42e-05	2.67e-05	1.63e-05	1.46e-05	2.81e-05	4.93e-06	2.84e-05	1.87e-05	1.21e-05	2.44e-05	1.26e-05	2.88e-05	5.92e-06	0.478577	0.597288	0.352565
K20527	2.48e-05	2.31e-05	4.1e-05	1.7e-05	1.37e-05	3.42e-05	2e-05	3.26e-05	2.19e-05	1.4e-05	3.45e-05	1.7e-05	9.34e-06	3.64e-05	1.63e-05	3.78e-05	1.44e-05	1.78e-05	0.478576	0.597288	0.441012
K05570	0.000109105	0.000128929	0.000113775	0.000132035	0.00010013	0.000128322	0.000133446	0.000130548	0.000127701	0.000117066	0.000138044	0.000141813	0.000172842	0.000115363	0.000142564	0.000107149	0.000110591	0.000112479	0.478284	0.597288	-1.33808
K01744	0.000128943	0.000142152	0.000141081	0.00010648	9.56e-05	0.00011549	0.000143455	0.000125109	0.000145944	0.000121749	0.000133114	0.000124795	9.81e-05	0.000133578	8.96e-05	0.000151269	0.000110591	0.000124318	0.476881	0.595797	1.25346
K11936	4.96e-06	6.61e-06	0	0	4.55e-06	1.28e-05	6.67e-06	0	7.3e-06	0	4.93e-06	0	9.34e-06	6.07e-06	4.07e-06	6.3e-06	0	0	0.474726	0.593256	0.195832
K09963	7.93e-05	5.29e-05	4.1e-05	8.52e-06	1.82e-05	3.85e-05	3e-05	7.07e-05	3.65e-05	9.37e-06	2.96e-05	1.7e-05	6.07e-05	1.21e-05	7.33e-05	1.89e-05	6.25e-05	1.78e-05	0.474514	0.593142	0.295325
K03191	0	0	4.55e-06	8.52e-06	1.37e-05	0	3.34e-06	1.09e-05	1.46e-05	4.68e-06	4.93e-06	5.67e-06	9.34e-06	0	0	0	9.62e-06	5.92e-06	0.473926	0.592558	0.201605
K00286	0.000714144	0.000776877	0.000705405	0.000685731	0.000650846	0.000705771	0.000753972	0.000832245	0.000758908	0.000749225	0.000670499	0.000720408	0.000696041	0.000734678	0.000720966	0.00072483	0.000783752	0.000627512	0.47356	0.592253	2.71739
K08313	9.92e-06	9.92e-06	0	4.26e-06	0	0	3.34e-06	5.44e-06	3.65e-06	4.68e-06	4.93e-06	5.67e-06	0	0	0	0	4.81e-06	5.92e-06	0.473015	0.591723	0.194133
K20531	1.98e-05	1.32e-05	3.64e-05	2.13e-05	1.82e-05	2.99e-05	2e-05	3.26e-05	2.19e-05	1.4e-05	2.96e-05	2.27e-05	9.34e-06	3.64e-05	1.63e-05	3.15e-05	1.44e-05	1.18e-05	0.471754	0.590295	0.481069
K00990	1.49e-05	6.61e-06	9.1e-06	1.28e-05	1.37e-05	8.55e-06	1.33e-05	1.09e-05	1.46e-05	1.4e-05	0	5.67e-06	9.34e-06	1.82e-05	4.07e-06	1.26e-05	1.44e-05	1.18e-05	0.470578	0.588974	0.446586
K02552	4.96e-06	0	1.37e-05	8.52e-06	0	0	3.34e-06	5.44e-06	3.65e-06	4.68e-06	9.86e-06	5.67e-06	0	6.07e-06	0	6.3e-06	4.81e-06	1.78e-05	0.469992	0.588391	-0.201383
K00169	0.000128943	0.000148764	0.00013653	0.000170368	0.00020026	0.000243812	0.000146791	0.000157746	0.000160538	0.000177941	0.000113393	0.000187193	0.000154157	0.000133578	0.000183296	0.000138663	0.000149057	0.000159838	0.469642	0.588104	0.991619
K22168	4.96e-06	3.31e-06	4.55e-06	4.26e-06	4.55e-06	8.55e-06	6.67e-06	1.09e-05	7.3e-06	4.68e-06	9.86e-06	5.67e-06	4.67e-06	1.21e-05	4.07e-06	1.26e-05	4.81e-06	5.92e-06	0.468846	0.587258	-0.42581
K16169	0	0	0	0	4.55e-06	0	0	0	0	0	0	0	4.67e-06	0	0	6.3e-06	0	0	0.468794	0.587258	-0.0804343
K02871	0.0011704	0.00120333	0.00111955	0.00121813	0.00119701	0.00123189	0.00122437	0.00110966	0.00114931	0.00121749	0.00126705	0.00116286	0.00120523	0.00122649	0.00107127	0.00118494	0.0011588	0.00131422	0.468685	0.587258	-3.86299
K21883	0	3.31e-06	0	4.26e-06	0	4.28e-06	6.67e-06	0	3.65e-06	4.68e-06	4.93e-06	0	0	0	0	0	4.81e-06	0	0.468591	0.587258	0.15723
K01523	0.000104146	0.000109093	9.1e-05	9.37e-05	0.000104682	9.84e-05	0.00013011	9.25e-05	9.85e-05	9.83e-05	0.000103533	0.000107778	8.88e-05	0.000109291	6.52e-05	0.000107149	8.65e-05	0.000112479	0.468503	0.587258	1.39222
K06181	4.96e-06	6.61e-06	9.1e-06	4.26e-06	9.1e-06	4.28e-06	1e-05	0	7.3e-06	9.37e-06	4.93e-06	5.67e-06	1.4e-05	6.07e-06	8.15e-06	6.3e-06	4.81e-06	5.92e-06	0.468432	0.587258	-0.419016
K13628	4.96e-06	9.92e-06	1.37e-05	1.28e-05	9.1e-06	8.55e-06	3.34e-06	1.09e-05	3.65e-06	4.68e-06	9.86e-06	5.67e-06	4.67e-06	2.43e-05	1.22e-05	2.52e-05	4.81e-06	5.92e-06	0.468381	0.587258	-0.284829
K11004	1.49e-05	1.98e-05	2.28e-05	1.7e-05	1.82e-05	2.57e-05	2e-05	0	1.82e-05	0	2.47e-05	1.7e-05	9.34e-06	2.43e-05	4.07e-06	3.15e-05	4.81e-06	1.18e-05	0.468345	0.587258	0.325727
K00094	0	9.92e-06	0	4.26e-06	4.55e-06	0	0	0	0	0	4.93e-06	0	4.67e-06	0	0	0	0	0	0.468142	0.587258	0.103541
K11922	4.96e-06	3.31e-06	4.55e-06	0	0	8.55e-06	0	5.44e-06	3.65e-06	0	4.93e-06	5.67e-06	4.67e-06	6.07e-06	0	0	0	0	0.467879	0.587258	0.189747
K02895	0.0013043	0.00130251	0.00118326	0.00126072	0.00124708	0.00123617	0.00116432	0.00118037	0.00119674	0.00132051	0.00133607	0.00124795	0.0012099	0.00122649	0.00112829	0.00128579	0.00123573	0.00126686	0.467587	0.587183	-4.10223
K03229	4.96e-06	9.92e-06	4.55e-06	8.52e-06	4.55e-06	0	6.67e-06	1.09e-05	7.3e-06	4.68e-06	1.48e-05	5.67e-06	4.67e-06	1.21e-05	4.07e-06	1.26e-05	4.81e-06	5.92e-06	0.467159	0.586795	-0.355301
K01414	2.48e-05	1.98e-05	3.19e-05	2.13e-05	1.82e-05	1.28e-05	2.34e-05	1.63e-05	2.19e-05	9.37e-06	1.48e-05	1.7e-05	1.4e-05	3.64e-05	1.22e-05	3.15e-05	1.92e-05	1.18e-05	0.467033	0.586788	0.495647
K01114	0	3.31e-06	0	1.28e-05	4.55e-06	8.55e-06	0	0	0	4.68e-06	9.86e-06	0	4.67e-06	6.07e-06	8.15e-06	0	9.62e-06	0	0.465536	0.585057	-0.176235
K03837	0	6.61e-06	4.55e-06	0	0	0	0	5.44e-06	0	0	0	0	0	0	4.07e-06	0	4.81e-06	0	0.464443	0.583834	0.111944
K11912	0	3.31e-06	0	0	0	0	0	5.44e-06	0	0	0	5.67e-06	0	0	0	0	4.81e-06	5.92e-06	0.464164	0.583633	-0.111642
K01011	1.49e-05	1.32e-05	1.37e-05	1.28e-05	9.1e-06	1.28e-05	2e-05	2.18e-05	1.09e-05	1.4e-05	1.48e-05	1.13e-05	9.34e-06	6.07e-06	8.15e-06	6.3e-06	1.92e-05	2.37e-05	0.464043	0.583631	0.503332
K20447	0	0	9.1e-06	4.26e-06	4.55e-06	4.28e-06	6.67e-06	0	7.3e-06	1.87e-05	1.48e-05	0	4.67e-06	0	4.07e-06	0	4.81e-06	5.92e-06	0.463877	0.583572	-0.180284
K20491	1.49e-05	9.92e-06	1.37e-05	2.13e-05	9.1e-06	1.71e-05	3.34e-06	2.18e-05	3.65e-06	1.4e-05	9.86e-06	1.7e-05	2.34e-05	1.21e-05	1.63e-05	1.26e-05	2.4e-05	5.92e-06	0.463376	0.583092	-0.418205
K10671	0	2.64e-05	9.1e-06	3.41e-05	4.55e-06	1.28e-05	2e-05	2.72e-05	1.09e-05	2.81e-05	2.96e-05	1.7e-05	1.87e-05	1.21e-05	8.15e-06	6.3e-06	2.4e-05	3.55e-05	0.463347	0.583092	-0.321492
K09790	0.000267804	0.000244634	0.00022755	0.000204441	0.000186606	0.000273753	0.000176816	0.000261097	0.000200673	0.000271594	0.000207066	0.000147485	0.000383056	0.000151793	0.000431765	0.000182783	0.000336581	0.000183518	0.463092	0.583034	-0.586855
K01890	0.000833168	0.000803324	0.000755466	0.000770915	0.000878415	0.000778486	0.000780661	0.000810487	0.0007808	0.000800734	0.000798683	0.000856548	0.000817497	0.000837897	0.000777991	0.000775252	0.000798177	0.00083471	0.463028	0.583034	-4.67537
K07108	9.92e-06	1.65e-05	1.37e-05	8.52e-06	9.1e-06	1.28e-05	2e-05	2.18e-05	1.46e-05	9.37e-06	1.97e-05	2.27e-05	9.34e-06	2.43e-05	8.15e-06	2.52e-05	9.62e-06	1.78e-05	0.462655	0.582784	-0.485268
K01591	0.000838127	0.000935559	0.000969363	0.000885913	0.000910274	0.000932473	0.000914107	0.000968233	0.000919446	0.000955262	0.000843054	0.000856548	0.000896911	0.000935045	0.000977581	0.000775252	0.00101455	0.00081695	0.462031	0.582147	2.76894
K00262	0.000853005	0.000829771	0.000837384	0.000834803	0.000737322	0.00083837	0.000827367	0.00089752	0.0009085	0.000842878	0.000877565	0.000816841	0.000868883	0.000819682	0.00100202	0.00081307	0.000923192	0.00078735	0.46131	0.581388	-2.80976
K03488	0.000104146	5.95e-05	8.65e-05	8.94e-05	7.28e-05	9.41e-05	7.01e-05	8.7e-05	7.66e-05	3.75e-05	5.92e-05	3.97e-05	0.000126128	3.04e-05	0.000167003	2.52e-05	0.000100974	3.55e-05	0.460751	0.580833	0.395996
K11180	0	3.31e-06	4.55e-06	0	4.55e-06	0	3.34e-06	1.09e-05	0	4.68e-06	9.86e-06	0	4.67e-06	6.07e-06	8.15e-06	0	4.81e-06	0	0.459954	0.579978	-0.193675
K13018	3.47e-05	5.95e-05	3.64e-05	5.54e-05	2.28e-05	3.42e-05	5.67e-05	5.98e-05	5.11e-05	3.75e-05	4.44e-05	3.4e-05	4.2e-05	4.25e-05	5.3e-05	5.67e-05	3.37e-05	2.96e-05	0.459919	0.579978	0.729152
K15553	3.97e-05	4.63e-05	4.55e-05	5.11e-05	6.37e-05	5.99e-05	4.67e-05	6.53e-05	3.65e-05	3.75e-05	2.47e-05	4.54e-05	4.67e-05	4.86e-05	7.33e-05	5.04e-05	4.33e-05	4.74e-05	0.458856	0.578892	0.810418
K21577	4.96e-06	2.31e-05	2.28e-05	2.56e-05	4.55e-06	1.28e-05	1.67e-05	1.63e-05	2.55e-05	2.34e-05	9.86e-06	1.7e-05	9.34e-06	6.07e-06	4.07e-06	6.3e-06	1.92e-05	2.96e-05	0.458527	0.578626	0.351192
K10806	9.92e-06	6.61e-06	1.82e-05	1.7e-05	2.28e-05	1.28e-05	6.67e-06	1.09e-05	7.3e-06	1.4e-05	1.48e-05	1.13e-05	1.4e-05	1.82e-05	1.22e-05	1.89e-05	1.92e-05	5.92e-06	0.457446	0.577411	-0.51586
K02079	0	0	4.55e-06	0	0	0	0	0	0	0	4.93e-06	0	0	0	0	6.3e-06	0	0	0.457384	0.577411	-0.0826395
K02575	1.49e-05	0	1.82e-05	4.26e-06	0	0	0	5.44e-06	0	1.4e-05	0	0	4.67e-06	1.21e-05	4.07e-06	1.26e-05	9.62e-06	5.92e-06	0.457306	0.577411	-0.183438
K01166	4.96e-06	0	0	0	0	0	0	0	0	0	0	0	0	0	0	6.3e-06	0	5.92e-06	0.455285	0.575128	-0.0835449
K02965	0.00114561	0.00119672	0.00121967	0.00119684	0.00126528	0.00121906	0.00111761	0.00104439	0.0011785	0.00129241	0.00127691	0.00124795	0.00118654	0.00113541	0.00107941	0.00117864	0.00116361	0.00124318	0.454721	0.574564	-3.43451
K04072	0.00037195	0.000370257	0.000304917	0.000285366	0.00033225	0.000363579	0.000283573	0.000288294	0.000295536	0.000313738	0.000295808	0.000323333	0.000322327	0.000291443	0.000276981	0.000289932	0.000336581	0.000343356	0.454465	0.574389	1.97192
K01907	0	9.92e-06	9.1e-06	1.28e-05	1.37e-05	8.55e-06	3.34e-06	0	7.3e-06	4.68e-06	9.86e-06	0	4.67e-06	6.07e-06	4.07e-06	6.3e-06	9.62e-06	5.92e-06	0.453691	0.573558	0.304758
K20628	1.49e-05	9.92e-06	4.55e-06	8.52e-06	0	1.28e-05	1e-05	5.44e-06	7.3e-06	9.37e-06	1.48e-05	1.7e-05	0	1.21e-05	8.15e-06	1.26e-05	0	1.78e-05	0.453307	0.57322	-0.319988
K01451	0	0	0	0	0	0	0	5.44e-06	0	4.68e-06	0	0	0	0	0	0	9.62e-06	0	0.453165	0.573189	-0.079388
K14654	1.98e-05	2.98e-05	1.82e-05	2.13e-05	3.64e-05	2.57e-05	3.34e-05	2.72e-05	2.92e-05	1.87e-05	2.96e-05	3.4e-05	1.87e-05	1.82e-05	2.04e-05	2.52e-05	1.92e-05	3.55e-05	0.453015	0.573148	0.763687
K01354	4.96e-06	0	0	0	0	4.28e-06	0	0	3.65e-06	4.68e-06	0	5.67e-06	0	0	0	0	4.81e-06	5.92e-06	0.452694	0.572889	-0.148096
K10036	0	3.31e-06	4.55e-06	8.52e-06	9.1e-06	8.55e-06	3.34e-06	5.44e-06	3.65e-06	0	4.93e-06	1.13e-05	4.67e-06	6.07e-06	8.15e-06	1.26e-05	0	1.18e-05	0.452632	0.572889	-0.28982
K11924	4.96e-06	0	4.55e-06	8.52e-06	4.55e-06	0	6.67e-06	0	3.65e-06	0	4.93e-06	5.67e-06	0	6.07e-06	4.07e-06	1.26e-05	4.81e-06	5.92e-06	0.452631	0.572889	-0.246103
K02170	9.92e-06	1.32e-05	1.82e-05	8.52e-06	9.1e-06	4.28e-06	1.33e-05	0	1.46e-05	4.68e-06	4.93e-06	5.67e-06	4.67e-06	1.82e-05	8.15e-06	1.26e-05	9.62e-06	5.92e-06	0.450634	0.570726	0.357579
K10805	4.96e-06	0	0	0	0	0	0	0	3.65e-06	0	0	5.67e-06	0	0	0	0	4.81e-06	5.92e-06	0.450447	0.570636	-0.115755
K13016	9.92e-06	1.65e-05	1.37e-05	4.26e-06	4.55e-06	1.71e-05	1.33e-05	2.72e-05	1.46e-05	9.37e-06	9.86e-06	1.13e-05	9.34e-06	1.82e-05	8.15e-06	1.89e-05	4.81e-06	1.18e-05	0.449456	0.569528	0.415968
K00318	0	0	9.1e-06	0	0	0	0	1.09e-05	0	0	0	0	4.67e-06	0	4.07e-06	0	0	0	0.448958	0.569044	0.0926221
K02988	0.00120512	0.00120664	0.00119691	0.00123517	0.00123342	0.00120195	0.00117433	0.00113686	0.00122958	0.00125964	0.00130649	0.00123661	0.00126128	0.00119006	0.0010957	0.00122906	0.00113476	0.00128462	0.448509	0.568623	-4.45064
K00180	0.000386828	0.000476044	0.000386835	0.000481289	0.000414175	0.000449127	0.000523777	0.000402524	0.000503506	0.000430804	0.000517665	0.000510525	0.000439113	0.000406805	0.000476571	0.000428595	0.000485638	0.000479514	0.448088	0.568236	-1.97625
K13695	4.96e-06	6.61e-06	1.37e-05	8.52e-06	9.1e-06	8.55e-06	6.67e-06	5.44e-06	1.09e-05	1.87e-05	0	0	1.4e-05	3.04e-05	8.15e-06	1.89e-05	9.62e-06	0	0.447932	0.568185	-0.2508
K21612	4.96e-06	1.32e-05	4.55e-06	4.26e-06	4.55e-06	8.55e-06	1e-05	1.09e-05	7.3e-06	4.68e-06	9.86e-06	1.7e-05	4.67e-06	1.21e-05	4.07e-06	1.26e-05	4.81e-06	1.18e-05	0.447545	0.567842	-0.410772
K02994	0.00129934	0.00122978	0.00120601	0.00116702	0.00126983	0.00121906	0.00125439	0.0011423	0.00125877	0.00131114	0.00131142	0.00127631	0.00126595	0.00122649	0.00109163	0.00122906	0.00124535	0.00128462	0.446901	0.567171	-4.17482
K01622	4.96e-06	1.32e-05	4.55e-06	4.26e-06	4.55e-06	4.28e-06	1e-05	1.09e-05	7.3e-06	4.68e-06	9.86e-06	1.13e-05	4.67e-06	1.21e-05	4.07e-06	1.26e-05	4.81e-06	1.18e-05	0.446737	0.567111	-0.431062
K06400	0.000173577	0.000188434	0.000131979	0.000144813	0.00023212	0.000183928	0.000120102	0.000152306	0.000127701	0.000149845	8.87e-05	0.000209883	0.000149485	0.000151793	0.00016293	0.000138663	0.000144249	0.000147998	0.446671	0.567111	0.920548
K03785	0.000153739	0.000132234	0.000154734	0.000170368	0.000163849	0.000166819	0.000123438	0.000163185	0.000134998	9.83e-05	9.37e-05	0.000107778	0.000205542	0.000121434	0.000236249	9.45e-05	0.00016829	0.000106559	0.446581	0.567111	0.726399
K13929	0	6.61e-06	0	4.26e-06	4.55e-06	4.28e-06	3.34e-06	0	3.65e-06	0	0	5.67e-06	4.67e-06	1.21e-05	0	1.26e-05	4.81e-06	0	0.445872	0.566453	-0.185945
K01849	9.92e-06	1.32e-05	1.82e-05	1.28e-05	1.82e-05	1.71e-05	1.67e-05	1.63e-05	1.82e-05	1.87e-05	2.96e-05	1.7e-05	1.87e-05	1.21e-05	1.22e-05	1.26e-05	2.4e-05	1.18e-05	0.445463	0.566081	-0.681179
K13853	0	0	4.55e-06	0	0	0	3.34e-06	0	0	4.68e-06	0	5.67e-06	0	0	0	0	4.81e-06	0	0.444956	0.565583	-0.11706
K07581	4.96e-06	9.92e-06	9.1e-06	4.26e-06	4.55e-06	8.55e-06	1e-05	1.09e-05	1.09e-05	4.68e-06	9.86e-06	1.7e-05	4.67e-06	1.21e-05	4.07e-06	1.89e-05	4.81e-06	1.18e-05	0.4449	0.565583	-0.403175
K03538	4.96e-06	9.92e-06	4.55e-06	4.26e-06	4.55e-06	8.55e-06	1e-05	1.09e-05	1.09e-05	4.68e-06	9.86e-06	1.13e-05	4.67e-06	1.21e-05	4.07e-06	1.26e-05	4.81e-06	1.78e-05	0.444461	0.565248	-0.418626
K07575	4.96e-06	9.92e-06	4.55e-06	4.26e-06	4.55e-06	8.55e-06	1e-05	1.09e-05	1.09e-05	4.68e-06	9.86e-06	1.13e-05	4.67e-06	1.21e-05	4.07e-06	1.26e-05	4.81e-06	1.78e-05	0.444461	0.565248	-0.418626
K03620	1.49e-05	1.65e-05	1.37e-05	1.7e-05	1.82e-05	1.28e-05	1.67e-05	1.63e-05	7.3e-06	1.87e-05	1.48e-05	5.67e-06	9.34e-06	6.07e-06	1.22e-05	1.26e-05	2.88e-05	5.92e-06	0.443847	0.56476	0.475735
K18682	0.000867883	0.000912418	0.00081918	0.000885913	0.000923928	0.000829815	0.000814023	0.000837685	0.000824583	0.000880339	0.000921936	0.000873566	0.000854869	0.000856112	0.000835017	0.000819372	0.000894343	0.000905749	0.443643	0.564647	-4.5889
K10012	6.94e-05	7.93e-05	9.56e-05	6.81e-05	7.28e-05	7.7e-05	0.000110093	8.7e-05	0.000113106	7.96e-05	7.4e-05	0.000102105	5.14e-05	8.5e-05	8.96e-05	7.56e-05	8.65e-05	7.7e-05	0.443622	0.564647	1.0747
K04797	4.96e-06	9.92e-06	9.1e-06	4.26e-06	4.55e-06	8.55e-06	1e-05	1.09e-05	1.09e-05	4.68e-06	9.86e-06	1.7e-05	4.67e-06	1.21e-05	4.07e-06	1.26e-05	4.81e-06	1.78e-05	0.443186	0.564359	-0.413821
K02823	0.000828209	0.00086283	0.000796425	0.000881654	0.000855658	0.000889699	0.000800678	0.000924717	0.00083188	0.000870974	0.000774032	0.000828186	0.000878226	0.000758965	0.000936848	0.000794161	0.000908767	0.000722231	0.443084	0.564359	2.82736
K09388	0	0	0	4.26e-06	0	0	0	0	0	0	4.93e-06	0	0	0	0	0	0	5.92e-06	0.443058	0.564359	-0.0853498
K03790	0.000401706	0.000528938	0.000423243	0.000592028	0.000591678	0.000547507	0.000510432	0.000473238	0.000510803	0.000575967	0.000552176	0.000555905	0.000476484	0.000467522	0.000537669	0.000504229	0.000519296	0.000574233	0.443026	0.564359	-1.89134
K16849	1.98e-05	2.64e-05	2.73e-05	2.98e-05	3.19e-05	1.71e-05	1.67e-05	2.18e-05	1.46e-05	1.87e-05	1.97e-05	2.84e-05	3.27e-05	3.64e-05	4.07e-05	3.78e-05	4.81e-06	1.78e-05	0.442836	0.564359	-0.521481
K03117	9.92e-06	1.32e-05	1.37e-05	1.28e-05	9.1e-06	8.55e-06	1e-05	5.44e-06	1.46e-05	2.34e-05	9.86e-06	5.67e-06	9.34e-06	1.82e-05	8.15e-06	1.89e-05	1.44e-05	5.92e-06	0.442816	0.564359	-0.475985
K18828	8.43e-05	4.96e-05	0.000109224	6.81e-05	0.000104682	8.98e-05	0.000106757	5.44e-05	9.85e-05	5.15e-05	7.4e-05	9.08e-05	2.8e-05	0.000127506	4.89e-05	0.000113452	3.85e-05	9.47e-05	0.44256	0.564359	0.545339
K02968	0.00118032	0.00120003	0.00111955	0.00114146	0.00115605	0.0011549	0.00109092	0.00104983	0.00113836	0.00113788	0.00121281	0.00116286	0.00114917	0.0011597	0.00107941	0.0010967	0.0011588	0.00123135	0.441456	0.563182	-4.91439
K14086	1.49e-05	1.32e-05	2.28e-05	2.13e-05	1.82e-05	1.71e-05	2.34e-05	2.72e-05	2.55e-05	1.4e-05	2.47e-05	2.27e-05	2.8e-05	1.82e-05	2.85e-05	1.26e-05	2.4e-05	2.96e-05	0.441134	0.562918	-0.774546
K18282	0	6.61e-06	0	0	1.37e-05	4.28e-06	3.34e-06	0	3.65e-06	1.4e-05	4.93e-06	0	4.67e-06	0	8.15e-06	0	9.62e-06	5.92e-06	0.440758	0.562584	-0.188735
K17241	0	0	0	4.26e-06	4.55e-06	0	0	5.44e-06	0	0	0	0	4.67e-06	0	4.07e-06	0	4.81e-06	1.18e-05	0.440752	0.562584	-0.134122
K08352	0	0	0	4.26e-06	4.55e-06	0	0	5.44e-06	3.65e-06	4.68e-06	4.93e-06	0	0	6.07e-06	0	6.3e-06	4.81e-06	0	0.440552	0.562584	-0.189151
K02015	0.00102658	0.00100498	0.00103763	0.00105628	0.000914826	0.00100519	0.000997511	0.0011423	0.000985121	0.000903753	0.0010797	0.00106076	0.000995011	0.0012872	0.00112014	0.00126057	0.000899151	0.000935348	0.440475	0.562584	-1.89725
K08094	1.98e-05	3.97e-05	3.64e-05	2.98e-05	2.28e-05	2.99e-05	2.34e-05	3.26e-05	4.01e-05	3.75e-05	4.44e-05	3.4e-05	9.34e-06	4.86e-05	1.63e-05	5.04e-05	1.92e-05	5.92e-05	0.440093	0.562322	-0.503451
K07502	0.000109105	0.000128929	0.000118326	0.000123517	0.00013199	0.000124045	0.000146791	0.000157746	0.000145944	9.37e-05	0.000118323	0.000187193	0.000135471	0.00013965	0.000211809	0.00013236	0.000105782	0.000159838	0.439481	0.561686	-0.955525
K19158	0.000317397	0.000257857	0.00027306	0.000238515	0.000254877	0.000299418	0.000310263	0.000255657	0.000339319	0.000271594	0.000211996	0.000255263	0.000233571	0.000303586	0.000329934	0.000289932	0.000302922	0.000219037	0.438985	0.561199	1.46309
K00179	0.000272763	0.000357033	0.000263958	0.000344995	0.000241223	0.000333637	0.000393667	0.000375326	0.000375805	0.000351199	0.000374691	0.000368713	0.000294299	0.000340016	0.000342153	0.000296235	0.000370239	0.000372955	0.438416	0.560619	-1.51523
K07447	0.0011952	0.00120995	0.00111044	0.00114146	0.00119701	0.00119767	0.00111428	0.00105526	0.00121133	0.00118003	0.0012424	0.00110047	0.00123792	0.0012022	0.00110793	0.00120385	0.00115399	0.00118399	0.437676	0.559818	-4.45015
K01804	0.000262845	0.000218187	0.000236652	0.000255552	0.000254877	0.000230979	0.000266893	0.000250218	0.000244456	0.000220085	0.000256367	0.00024959	0.000200871	0.000236797	0.000285128	0.000271023	0.000230798	0.000183518	0.437627	0.559818	1.91863
K05020	4.96e-06	6.61e-06	1.37e-05	3.41e-05	4.55e-06	1.28e-05	6.67e-06	1.63e-05	3.65e-06	1.4e-05	1.48e-05	1.7e-05	4.67e-06	1.82e-05	8.15e-06	1.26e-05	9.62e-06	3.55e-05	0.437434	0.559801	-0.290741
K04486	0.00100179	0.00106118	0.000932955	0.00105628	0.000973993	0.00112496	0.000960813	0.00113686	0.00105809	0.00107701	0.00109449	0.00105509	0.00112114	0.000874328	0.00119346	0.000951733	0.00128862	0.000994548	0.437392	0.559801	-2.10487
K09931	1.49e-05	2.64e-05	1.37e-05	2.13e-05	1.37e-05	2.99e-05	2e-05	5.44e-06	1.82e-05	1.87e-05	1.97e-05	2.27e-05	3.27e-05	1.82e-05	1.63e-05	1.89e-05	1.44e-05	2.37e-05	0.436784	0.559262	-0.613025
K09132	4.96e-06	1.32e-05	4.55e-06	1.7e-05	4.55e-06	1.28e-05	6.67e-06	0	7.3e-06	9.37e-06	9.86e-06	5.67e-06	1.4e-05	1.21e-05	1.22e-05	6.3e-06	4.81e-06	1.18e-05	0.436167	0.558618	-0.399522
K02926	0.00126463	0.00119011	0.00116506	0.00125646	0.00121522	0.00124044	0.00116098	0.00110422	0.00120039	0.00121281	0.00120788	0.00112316	0.00125194	0.0011597	0.00107534	0.001103	0.00118765	0.00127278	0.435496	0.557904	4.04676
K04075	0.000912517	0.000942171	0.000914751	0.000915728	0.000951237	0.000970969	0.000940797	0.000854003	0.000915798	0.000945897	0.00101068	0.000941636	0.00092494	0.000868256	0.000932775	0.000907613	0.000918384	0.00100047	0.435296	0.557795	-4.86377
K19173	4.96e-06	9.92e-06	9.1e-06	8.52e-06	9.1e-06	1.28e-05	6.67e-06	1.63e-05	1.46e-05	9.37e-06	0	2.27e-05	9.34e-06	1.82e-05	1.63e-05	1.26e-05	9.62e-06	1.18e-05	0.433218	0.555277	-0.436468
K22116	1.49e-05	1.98e-05	3.64e-05	3.83e-05	3.19e-05	2.14e-05	3.34e-05	1.63e-05	2.19e-05	3.28e-05	4.93e-05	3.4e-05	2.34e-05	2.43e-05	1.22e-05	1.89e-05	2.88e-05	4.74e-05	0.432817	0.554908	-0.534137
K06937	1.49e-05	2.31e-05	5.01e-05	2.56e-05	1.37e-05	2.14e-05	3.67e-05	3.26e-05	2.92e-05	3.28e-05	3.94e-05	6.24e-05	1.4e-05	3.64e-05	2.04e-05	3.15e-05	2.4e-05	2.96e-05	0.43267	0.554865	-0.484477
K03647	9.92e-06	3.31e-06	0	0	4.55e-06	8.55e-06	0	5.44e-06	3.65e-06	9.37e-06	0	5.67e-06	0	0	4.07e-06	0	1.44e-05	2.37e-05	0.431682	0.553743	-0.166134
K00662	0.000123983	0.000138846	0.000109224	0.000123517	0.000113784	0.000106935	0.000113429	0.000130548	0.000120404	9.37e-05	7.4e-05	0.00013614	0.000149485	9.11e-05	0.000158857	9.45e-05	0.000100974	0.000106559	0.430588	0.552484	1.08689
K02821	2.48e-05	4.3e-05	3.64e-05	2.56e-05	3.19e-05	2.99e-05	2.34e-05	4.35e-05	4.38e-05	5.62e-05	1.97e-05	2.27e-05	3.74e-05	3.04e-05	3.67e-05	3.78e-05	5.77e-05	4.14e-05	0.429119	0.550744	-0.673121
K21028	9.92e-06	6.61e-06	1.82e-05	8.52e-06	4.55e-06	1.28e-05	1e-05	1.09e-05	1.46e-05	4.68e-06	9.86e-06	1.13e-05	1.87e-05	0	1.22e-05	0	9.62e-06	1.18e-05	0.429107	0.550744	0.38379
K01751	1.49e-05	6.28e-05	5.46e-05	5.54e-05	2.73e-05	4.28e-05	6.67e-05	3.26e-05	5.11e-05	3.28e-05	2.96e-05	3.4e-05	4.67e-05	2.43e-05	4.48e-05	1.26e-05	5.29e-05	7.1e-05	0.428881	0.550728	0.503101
K02100	0	3.31e-06	0	0	0	0	0	0	0	0	0	0	4.67e-06	0	4.07e-06	0	0	0	0.427996	0.549735	-0.0880953
K06882	0	3.31e-06	4.55e-06	4.26e-06	4.55e-06	0	3.34e-06	1.09e-05	3.65e-06	9.37e-06	0	0	4.67e-06	6.07e-06	4.07e-06	6.3e-06	9.62e-06	5.92e-06	0.427443	0.549169	-0.279786
K12944	4.96e-06	6.61e-06	0	4.26e-06	4.55e-06	4.28e-06	3.34e-06	0	0	4.68e-06	0	1.13e-05	0	6.07e-06	0	6.3e-06	4.81e-06	5.92e-06	0.426806	0.548495	-0.241551
K19268	3.47e-05	6.61e-05	3.64e-05	3.83e-05	1.82e-05	2.57e-05	5.34e-05	3.81e-05	5.47e-05	5.62e-05	7.4e-05	2.84e-05	5.14e-05	3.04e-05	4.48e-05	3.15e-05	5.29e-05	4.74e-05	0.42676	0.548495	-0.6076
K09723	4.96e-06	9.92e-06	4.55e-06	4.26e-06	4.55e-06	4.28e-06	1.67e-05	1.09e-05	1.09e-05	9.37e-06	9.86e-06	1.7e-05	4.67e-06	1.21e-05	4.07e-06	1.26e-05	4.81e-06	1.18e-05	0.425673	0.547326	-0.413251
K01183	8.43e-05	9.26e-05	0.000100122	5.96e-05	8.19e-05	7.27e-05	6.67e-05	8.16e-05	8.03e-05	7.49e-05	6.41e-05	9.08e-05	8.41e-05	0.000109291	6.92e-05	0.000113452	7.21e-05	9.47e-05	0.425667	0.547326	-1.13279
K07264	0	0	4.55e-06	0	0	0	1e-05	0	1.09e-05	0	0	0	0	6.07e-06	0	6.3e-06	0	0	0.425174	0.546971	0.116164
K01491	0.00122	0.00116366	0.00117416	0.00119684	0.0011515	0.00118912	0.00122103	0.00100087	0.00119674	0.001269	0.00120295	0.0012593	0.00118187	0.00123863	0.00106719	0.00115342	0.00115399	0.00121359	0.424793	0.546625	-3.78383
K22719	4.96e-06	3.31e-06	4.55e-06	4.26e-06	4.55e-06	4.28e-06	3.34e-06	5.44e-06	3.65e-06	0	0	0	4.67e-06	6.07e-06	8.15e-06	6.3e-06	4.81e-06	0	0.424571	0.546483	0.330047
K01772	9.92e-06	1.98e-05	2.73e-05	2.13e-05	2.73e-05	1.28e-05	2e-05	1.63e-05	1.82e-05	2.81e-05	1.48e-05	5.67e-06	9.34e-06	4.25e-05	2.04e-05	3.15e-05	2.88e-05	2.37e-05	0.424559	0.546483	-0.477106
K07281	0	0	4.55e-06	0	0	4.28e-06	0	0	3.65e-06	4.68e-06	0	5.67e-06	0	0	0	0	4.81e-06	5.92e-06	0.424554	0.546483	-0.157188
K03749	4.96e-06	3.31e-06	0	8.52e-06	9.1e-06	4.28e-06	6.67e-06	5.44e-06	3.65e-06	9.37e-06	0	0	9.34e-06	1.21e-05	4.07e-06	1.89e-05	9.62e-06	0	0.424244	0.546483	-0.252413
K15987	0.000307479	0.000267775	0.000295815	0.000251293	0.000218466	0.000260921	0.000266893	0.000217581	0.000251753	0.000248181	0.000271158	0.00024959	0.000238242	0.000333945	0.000224029	0.000315143	0.000235606	0.000367035	0.423998	0.546321	-1.34282
K03679	4.96e-06	9.92e-06	4.55e-06	4.26e-06	4.55e-06	8.55e-06	1.33e-05	1.09e-05	1.46e-05	4.68e-06	9.86e-06	1.7e-05	4.67e-06	1.21e-05	4.07e-06	1.89e-05	4.81e-06	1.78e-05	0.423003	0.545182	-0.375501
K06391	0.000213251	0.00013554	0.000241203	0.000174627	0.000177503	0.000286586	0.000150127	0.000190383	0.000164187	0.000271594	0.000246507	0.000147485	0.000224228	0.000188223	0.000272908	0.000151269	0.000235606	0.000165758	0.421121	0.542898	-0.873474
K02836	0.00105138	0.00106449	0.000978465	0.00109036	0.00108778	0.00110785	0.0010609	0.000973673	0.000977824	0.00108169	0.00104026	0.00102672	0.00103705	0.00100183	0.000949068	0.000970641	0.0010434	0.00107151	0.420885	0.542738	4.46581
K06019	9.92e-05	9.26e-05	0.000127428	7.24e-05	6.37e-05	0.000106935	8.67e-05	7.07e-05	0.000113106	8.43e-05	8.38e-05	9.08e-05	6.07e-05	9.71e-05	8.55e-05	0.000107149	7.21e-05	8.88e-05	0.420451	0.54232	1.05085
K02954	0.000803412	0.000750431	0.000796425	0.000770915	0.000782836	0.000795596	0.000737291	0.000652742	0.000715125	0.000767956	0.000734591	0.000731753	0.000789469	0.000722535	0.000562109	0.000825675	0.000730861	0.000722231	0.420391	0.54232	2.52307
K07248	0	0	4.55e-06	0	1.37e-05	0	0	1.09e-05	0	0	4.93e-06	0	4.67e-06	1.21e-05	8.15e-06	1.26e-05	4.81e-06	0	0.419975	0.541993	-0.173269
K06133	0.000466177	0.000495879	0.000464202	0.000528141	0.000459689	0.000449127	0.00046039	0.000500435	0.000437832	0.000571284	0.000488084	0.000516198	0.000504513	0.000382518	0.00051323	0.000409686	0.00059142	0.000467674	0.419787	0.541893	-1.95819
K10763	4.96e-06	0	9.1e-06	0	0	4.28e-06	3.34e-06	5.44e-06	0	0	0	0	0	6.07e-06	4.07e-06	6.3e-06	0	0	0.419758	0.541893	0.16765
K21903	0.000986907	0.00099837	0.000919302	0.000971097	0.00101496	0.000932473	0.000947469	0.000864883	0.000934041	0.0010536	0.00101561	0.00103807	0.00092494	0.000874328	0.000904262	0.000939127	0.00100974	0.00100639	0.419412	0.541694	-3.6304
K05780	0	6.61e-06	0	4.26e-06	0	0	3.34e-06	1.09e-05	3.65e-06	0	0	1.13e-05	4.67e-06	6.07e-06	8.15e-06	6.3e-06	0	5.92e-06	0.419195	0.541557	-0.214823
K03421	4.96e-06	9.92e-06	9.1e-06	4.26e-06	4.55e-06	8.55e-06	1.33e-05	1.09e-05	1.09e-05	4.68e-06	9.86e-06	1.7e-05	4.67e-06	1.21e-05	4.07e-06	1.89e-05	4.81e-06	1.78e-05	0.419192	0.541557	-0.402179
K03531	0.000986907	0.000981841	0.000973914	0.000996652	0.00106502	0.00103513	0.00096415	0.000924717	0.00100336	0.0010255	0.000995888	0.000975671	0.00100902	0.00098969	0.000985727	0.00102737	0.00100012	0.00103599	0.418901	0.541463	-6.54619
K19303	4.96e-06	0	9.1e-06	0	0	0	0	0	3.65e-06	0	4.93e-06	5.67e-06	0	6.07e-06	0	6.3e-06	0	5.92e-06	0.418617	0.541239	-0.172154
K02799	2.48e-05	1.98e-05	9.1e-06	2.13e-05	2.28e-05	2.14e-05	1e-05	4.35e-05	2.19e-05	4.68e-06	1.48e-05	3.4e-05	9.34e-06	1.82e-05	3.67e-05	1.26e-05	9.62e-06	1.78e-05	0.418526	0.541239	0.394954
K02800	2.48e-05	1.98e-05	9.1e-06	2.13e-05	2.28e-05	2.14e-05	1e-05	4.35e-05	2.19e-05	4.68e-06	1.48e-05	3.4e-05	9.34e-06	1.82e-05	3.67e-05	1.26e-05	9.62e-06	1.78e-05	0.418526	0.541239	0.394954
K07576	0.000292601	0.000380174	0.000336774	0.000327958	0.000382315	0.000402075	0.000336952	0.000304613	0.00036486	0.00036993	0.000389481	0.000391403	0.000392399	0.000321801	0.000399179	0.000296235	0.000322156	0.000378875	0.418258	0.541204	-1.98526
K18907	4.96e-06	0	9.1e-06	0	0	4.28e-06	0	0	0	4.68e-06	0	0	0	0	4.07e-06	0	0	0	0.41808	0.541116	0.116935
K01139	5.46e-05	2.31e-05	5.46e-05	4.69e-05	5.46e-05	4.28e-05	4.34e-05	3.81e-05	4.74e-05	3.75e-05	4.93e-05	3.4e-05	3.27e-05	5.46e-05	3.67e-05	6.3e-05	2.88e-05	2.96e-05	0.417834	0.540941	0.813693
K05501	4.96e-06	3.31e-06	4.55e-06	4.26e-06	4.55e-06	4.28e-06	3.34e-06	5.44e-06	3.65e-06	9.37e-06	0	0	9.34e-06	1.21e-05	8.15e-06	6.3e-06	4.81e-06	0	0.417167	0.540221	-0.313202
K07473	0.000714144	0.000697537	0.000696303	0.000728323	0.000732771	0.000680106	0.000834039	0.0006745	0.000788097	0.000697716	0.000764172	0.000833858	0.000696041	0.000862184	0.000606915	0.000750041	0.000730861	0.000852469	0.416166	0.539066	-2.24074
K18298	0	0	0	0	4.55e-06	0	0	0	0	0	0	0	0	6.07e-06	0	6.3e-06	0	0	0.415931	0.538905	-0.0903795
K12630	0	0	0	4.26e-06	0	0	0	0	0	0	0	5.67e-06	0	0	0	0	0	5.92e-06	0.415687	0.538731	-0.0904164
K03219	4.96e-06	3.31e-06	4.55e-06	8.52e-06	4.55e-06	0	1e-05	5.44e-06	1.09e-05	4.68e-06	9.86e-06	5.67e-06	4.67e-06	1.21e-05	4.07e-06	1.26e-05	4.81e-06	5.92e-06	0.414931	0.537894	-0.402586
K03672	2.98e-05	6.61e-06	2.28e-05	1.7e-05	2.73e-05	2.14e-05	2.34e-05	1.63e-05	1.82e-05	2.34e-05	2.47e-05	2.84e-05	1.4e-05	1.21e-05	1.22e-05	1.26e-05	1.44e-05	1.78e-05	0.41482	0.537893	0.619117
K21515	0	0	0	0	4.55e-06	0	1e-05	5.44e-06	3.65e-06	0	0	0	0	6.07e-06	0	6.3e-06	0	0	0.414781	0.537893	0.134113
K02058	7.93e-05	9.92e-05	0.000127428	0.000144813	0.000118336	0.000106935	0.000156799	0.000174064	0.000134998	0.000131114	0.000147904	0.000124795	0.000107442	0.000194295	0.000109978	0.000201692	0.000110591	0.000130238	0.414021	0.537141	-0.869836
K17240	9.92e-06	1.32e-05	4.55e-06	4.26e-06	9.1e-06	8.55e-06	1.33e-05	5.44e-06	1.09e-05	1.87e-05	1.48e-05	5.67e-06	0	1.21e-05	1.22e-05	6.3e-06	1.44e-05	1.18e-05	0.413935	0.537141	-0.440562
K09738	0	6.61e-06	4.55e-06	0	0	0	6.67e-06	0	3.65e-06	0	0	5.67e-06	0	0	0	0	0	5.92e-06	0.413267	0.536447	0.141243
K02921	9.92e-06	1.32e-05	1.37e-05	1.28e-05	4.55e-06	8.55e-06	1.67e-05	1.63e-05	7.3e-06	9.37e-06	1.97e-05	2.27e-05	4.67e-06	1.82e-05	4.07e-06	1.89e-05	4.81e-06	2.37e-05	0.413237	0.536447	-0.419057
K20201	1.98e-05	4.3e-05	1.82e-05	2.13e-05	1.37e-05	4.28e-06	2.34e-05	2.72e-05	1.46e-05	1.87e-05	2.47e-05	1.7e-05	2.34e-05	3.04e-05	2.85e-05	1.89e-05	3.85e-05	1.78e-05	0.413176	0.536447	-0.525771
K07390	0	0	0	4.26e-06	4.55e-06	0	1e-05	0	3.65e-06	0	0	5.67e-06	0	0	0	0	0	5.92e-06	0.412581	0.535983	0.132698
K01971	1.98e-05	3.31e-05	1.37e-05	8.52e-06	9.1e-06	8.55e-06	6.67e-06	5.44e-06	3.65e-06	9.37e-06	0	2.27e-05	4.67e-06	1.21e-05	4.07e-06	1.89e-05	0	5.92e-06	0.412563	0.535983	0.256199
K02430	4.96e-06	1.65e-05	1.37e-05	4.26e-06	9.1e-06	1.28e-05	1e-05	1.09e-05	1.09e-05	9.37e-06	9.86e-06	1.13e-05	9.34e-06	6.07e-06	1.22e-05	2.52e-05	9.62e-06	1.78e-05	0.412374	0.535983	-0.490036
K13829	1.49e-05	1.32e-05	1.37e-05	1.7e-05	1.82e-05	8.55e-06	2e-05	1.09e-05	1.46e-05	1.87e-05	9.86e-06	1.7e-05	1.4e-05	2.43e-05	1.22e-05	2.52e-05	1.44e-05	1.18e-05	0.412345	0.535983	-0.719677
K06013	2.48e-05	5.29e-05	4.55e-05	2.13e-05	4.1e-05	1.71e-05	4e-05	1.63e-05	3.65e-05	3.28e-05	4.44e-05	2.84e-05	2.8e-05	5.46e-05	2.44e-05	6.93e-05	2.88e-05	3.55e-05	0.409835	0.532981	-0.541209
K20344	7.93e-05	7.6e-05	6.83e-05	6.39e-05	8.19e-05	6.42e-05	6.01e-05	4.35e-05	5.84e-05	7.02e-05	7.89e-05	7.37e-05	7.01e-05	0.000103219	6.52e-05	6.93e-05	5.29e-05	5.92e-05	0.409598	0.532815	-1.12728
K07342	4.96e-06	9.92e-06	9.1e-06	4.26e-06	4.55e-06	8.55e-06	1e-05	1.09e-05	1.09e-05	9.37e-06	9.86e-06	1.7e-05	4.67e-06	1.21e-05	4.07e-06	1.26e-05	4.81e-06	1.18e-05	0.409352	0.532637	-0.52094
K19225	0.000163658	0.000138846	0.000154734	0.000132035	0.000141093	0.000183928	0.000133446	0.000195822	0.000131349	0.000145162	0.000108463	0.000141813	0.000186857	0.000145721	0.000138491	0.000138663	0.000153865	0.000136158	0.409237	0.532629	1.43887
K13689	0	3.31e-06	4.55e-06	4.26e-06	4.55e-06	0	1.33e-05	5.44e-06	3.65e-06	9.37e-06	4.93e-06	0	0	1.82e-05	4.07e-06	1.89e-05	4.81e-06	0	0.409234	0.532629	-0.20111
K07393	9.92e-06	2.64e-05	9.1e-06	2.13e-05	3.64e-05	1.71e-05	1.67e-05	1.63e-05	3.28e-05	9.37e-06	4.93e-06	2.84e-05	2.34e-05	1.21e-05	2.85e-05	1.26e-05	9.62e-06	2.37e-05	0.408222	0.53159	0.437402
K03217	0.000887721	0.000945476	0.000987567	0.00090295	0.000887517	0.000949582	0.00092078	0.000941036	0.000923095	0.00103018	0.000926866	0.000856548	0.000938954	0.000947188	0.000936848	0.000958036	0.000928001	0.000964948	0.408187	0.53159	-5.12031
K09793	4.96e-05	7.27e-05	8.19e-05	5.96e-05	6.37e-05	6.84e-05	5.34e-05	7.07e-05	6.93e-05	5.15e-05	6.41e-05	6.24e-05	5.61e-05	4.86e-05	6.52e-05	7.56e-05	6.73e-05	6.51e-05	0.407377	0.530773	1.48441
K03287	0	3.31e-06	4.55e-06	4.26e-06	4.55e-06	4.28e-06	3.34e-06	5.44e-06	3.65e-06	4.68e-06	0	5.67e-06	4.67e-06	1.21e-05	4.07e-06	6.3e-06	0	5.92e-06	0.406969	0.530382	-0.332019
K09002	9.92e-06	5.29e-05	1.82e-05	4.26e-05	3.64e-05	2.99e-05	3.34e-05	7.62e-05	4.38e-05	2.34e-05	5.42e-05	3.4e-05	3.74e-05	5.46e-05	4.48e-05	5.67e-05	3.37e-05	6.51e-05	0.406909	0.530382	-0.535042
K02956	0.0011704	0.00124631	0.00113775	0.00122239	0.0011515	0.00120623	0.00116432	0.00109334	0.00119674	0.00118003	0.00127691	0.00117988	0.00119121	0.00122042	0.0010957	0.00119754	0.00115399	0.00128462	0.406814	0.530382	-4.84676
K07124	0.000619917	0.000743819	0.000737262	0.000702768	0.000728219	0.000701493	0.000697257	0.000647302	0.000733368	0.000800734	0.000764172	0.000714735	0.000682026	0.000698248	0.000635428	0.000674407	0.000673161	0.000911669	0.406648	0.530382	-2.29754
K22232	0	0	0	4.26e-06	0	4.28e-06	3.34e-06	0	0	0	0	5.67e-06	0	6.07e-06	4.07e-06	0	4.81e-06	0	0.406427	0.530239	-0.161627
K18955	9.92e-06	0	0	0	0	4.28e-06	3.34e-06	0	7.3e-06	9.37e-06	0	1.13e-05	0	0	0	0	9.62e-06	1.18e-05	0.405947	0.529754	-0.168982
K11530	4.96e-06	6.61e-06	0	0	0	4.28e-06	6.67e-06	5.44e-06	7.3e-06	0	0	5.67e-06	0	6.07e-06	0	6.3e-06	0	5.92e-06	0.405944	0.529754	0.228246
K03534	0.000203333	0.000241328	0.000218448	0.000183146	0.00020026	0.000205315	0.00026022	0.000293734	0.000244456	0.000224768	0.000266228	0.000192865	0.000256928	0.000236797	0.000285128	0.000252115	0.000230798	0.000219037	0.405549	0.529518	-1.60694
K05305	1.49e-05	1.98e-05	1.37e-05	2.98e-05	4.55e-05	3.42e-05	3.34e-05	3.81e-05	2.92e-05	9.37e-06	1.48e-05	1.7e-05	3.74e-05	2.43e-05	5.3e-05	2.52e-05	2.88e-05	0	0.404875	0.528779	0.420565
K03210	0.000733981	0.000654561	0.000678099	0.000600547	0.000623538	0.000714325	0.000687249	0.000636423	0.000656747	0.000655572	0.000685289	0.000692045	0.000696041	0.000607172	0.000769845	0.000592469	0.000754902	0.000722231	0.404651	0.528627	-2.80124
K00287	0.000803412	0.000816548	0.000814629	0.000783692	0.000878415	0.000842647	0.000814023	0.000750653	0.000861069	0.000824148	0.000798683	0.000737425	0.000948297	0.000752893	0.000830944	0.000693315	0.000841451	0.000710391	0.403251	0.526939	2.80717
K00020	2.98e-05	3.31e-05	3.19e-05	3.41e-05	2.28e-05	2.14e-05	3.34e-05	2.72e-05	2.19e-05	1.4e-05	3.94e-05	5.67e-05	2.8e-05	3.04e-05	2.44e-05	4.41e-05	9.62e-06	5.33e-05	0.403215	0.526939	-0.552136
K02773	5.95e-05	4.96e-05	4.55e-05	4.26e-05	4.55e-05	4.28e-05	5e-05	5.44e-05	5.84e-05	3.28e-05	2.96e-05	6.81e-05	5.61e-05	3.04e-05	7.33e-05	2.52e-05	4.33e-05	4.14e-05	0.40321	0.526939	0.777074
K00773	0.000986907	0.000955394	0.000987567	0.000988134	0.00107868	0.000966692	0.00092078	0.00089752	0.000963229	0.00101614	0.00102054	0.000969998	0.000920268	0.00102005	0.000932775	0.00100216	0.000990508	0.00104191	0.402805	0.526778	-4.59883
K03058	4.96e-06	9.92e-06	4.55e-06	4.26e-06	4.55e-06	8.55e-06	1.33e-05	1.09e-05	1.09e-05	9.37e-06	9.86e-06	1.7e-05	4.67e-06	1.21e-05	4.07e-06	1.26e-05	4.81e-06	1.18e-05	0.402363	0.526341	-0.485901
K07706	0.000123983	7.27e-05	0.000118326	0.000127776	0.000177503	0.000188206	9.01e-05	6.53e-05	9.85e-05	0.000121749	0.000103533	0.000141813	9.34e-05	9.11e-05	0.000109978	9.45e-05	8.65e-05	0.000100639	0.402209	0.52628	0.744382
K11176	0	9.92e-06	4.55e-06	0	0	0	1.33e-05	0	1.09e-05	4.68e-06	0	5.67e-06	0	6.07e-06	0	0	0	5.92e-06	0.401521	0.52552	0.165737
K02563	0.00107122	0.00105788	0.00103308	0.00103498	0.00110143	0.0010779	0.00102086	0.00100087	0.00106539	0.00111447	0.00109449	0.00110614	0.00106041	0.00103219	0.00100202	0.00102737	0.00110591	0.00105375	0.401406	0.52551	-6.35422
K05352	4.46e-05	4.3e-05	3.64e-05	3.83e-05	3.19e-05	4.71e-05	5.67e-05	3.81e-05	4.38e-05	3.75e-05	3.94e-05	3.4e-05	5.61e-05	3.04e-05	5.7e-05	3.15e-05	2.4e-05	3.55e-05	0.401243	0.525438	0.933688
K14124	0	3.31e-06	4.55e-06	0	0	0	0	0	0	4.68e-06	0	5.67e-06	0	0	0	0	0	5.92e-06	0.401065	0.525345	-0.127522
K16511	0.000183495	0.000211575	0.000191142	0.000242774	0.000300391	0.000307973	0.000240203	0.00022846	0.000269996	0.000173258	0.000177485	0.00018152	0.000275613	0.000151793	0.000378813	0.000126057	0.000283689	0.000189438	0.400629	0.524914	0.768491
K11907	4.96e-06	0	4.55e-06	0	0	4.28e-06	0	0	0	0	0	0	0	0	0	0	0	5.92e-06	0.400025	0.524263	0.111792
K07013	9.92e-06	9.92e-06	9.1e-06	4.26e-06	9.1e-06	3.42e-05	1.33e-05	1.63e-05	1.46e-05	9.37e-06	9.86e-06	1.13e-05	9.34e-06	1.21e-05	1.22e-05	1.26e-05	9.62e-06	1.18e-05	0.399733	0.52402	0.434586
K03599	4.96e-06	3.31e-06	4.55e-06	4.26e-06	4.55e-06	4.28e-06	3.34e-06	5.44e-06	3.65e-06	4.68e-06	0	0	9.34e-06	1.21e-05	8.15e-06	1.26e-05	4.81e-06	0	0.399681	0.52402	-0.301649
K02078	0.00189446	0.00183145	0.00172483	0.00180164	0.00177048	0.00187778	0.00186825	0.00179504	0.00186443	0.00170917	0.0017995	0.00179818	0.00188258	0.00189438	0.00181667	0.00182783	0.00175503	0.0017227	0.399164	0.523555	6.57565
K03077	0.000342194	0.000307445	0.000314019	0.000379069	0.000359558	0.00032936	0.000383658	0.000397084	0.000383103	0.000379295	0.000419062	0.000397075	0.000341013	0.000340016	0.000439911	0.00035296	0.00036543	0.000301916	0.398437	0.522741	-2.07882
K02574	4.96e-06	6.61e-06	9.1e-06	1.28e-05	9.1e-06	4.28e-06	1.67e-05	5.44e-06	1.09e-05	9.37e-06	0	5.67e-06	9.34e-06	6.07e-06	8.15e-06	6.3e-06	1.44e-05	5.92e-06	0.398429	0.522741	0.444466
K03308	0.00110097	0.00106779	0.00107859	0.00100943	0.000960339	0.00112068	0.00121102	0.00115862	0.0011785	0.00109106	0.000951517	0.00104941	0.0010791	0.000983619	0.00120976	0.000939127	0.00124535	0.000982708	0.397982	0.522424	2.46722
K00246	9.92e-06	9.92e-06	2.28e-05	8.52e-06	9.1e-06	1.28e-05	6.67e-06	1.09e-05	7.3e-06	1.4e-05	9.86e-06	0	4.67e-06	1.21e-05	8.15e-06	1.89e-05	9.62e-06	0	0.397523	0.521962	0.383099
K16011	9.92e-06	1.32e-05	2.28e-05	8.52e-06	1.37e-05	1.28e-05	1.67e-05	5.44e-06	2.55e-05	0	9.86e-06	1.7e-05	1.4e-05	1.82e-05	8.15e-06	1.26e-05	1.92e-05	5.92e-06	0.397328	0.521846	0.445683
K10537	4.96e-06	6.61e-06	1.37e-05	4.26e-06	0	8.55e-06	1e-05	1.63e-05	7.3e-06	9.37e-06	4.93e-06	1.13e-05	4.67e-06	6.07e-06	4.07e-06	1.89e-05	1.44e-05	1.78e-05	0.39691	0.521437	-0.372113
K18692	2.98e-05	2.64e-05	1.82e-05	1.28e-05	1.82e-05	2.99e-05	1.67e-05	2.18e-05	2.55e-05	2.34e-05	9.86e-06	3.4e-05	3.27e-05	1.82e-05	2.85e-05	2.52e-05	1.92e-05	3.55e-05	0.396596	0.521165	-0.707308
K18350	6.45e-05	8.26e-05	8.65e-05	5.96e-05	6.37e-05	8.13e-05	7.01e-05	7.62e-05	8.39e-05	6.56e-05	8.38e-05	7.94e-05	7.01e-05	4.86e-05	0.000101831	5.04e-05	6.25e-05	5.33e-05	0.396282	0.520891	1.10096
K12952	0.000188455	0.00024794	0.00022755	0.000259811	0.000273082	0.000205315	0.000220186	0.00022846	0.000218916	0.000295007	0.000251437	0.000289298	0.000191528	0.000224654	0.000179223	0.000245812	0.00022599	0.000301916	0.39592	0.520555	-1.43602
K09741	4.96e-06	1.32e-05	9.1e-06	4.26e-06	4.55e-06	8.55e-06	1e-05	1.09e-05	1.09e-05	9.37e-06	9.86e-06	1.7e-05	4.67e-06	1.21e-05	4.07e-06	1.26e-05	4.81e-06	1.78e-05	0.395825	0.520555	-0.483131
K11358	0.000421543	0.000386786	0.000373182	0.000400365	0.000423278	0.000423462	0.000413684	0.000418842	0.000434183	0.000454218	0.00035497	0.000374385	0.000420427	0.000291443	0.00051323	0.000302538	0.000413513	0.000378875	0.395685	0.520527	1.70644
K15739	4.96e-06	0	0	0	0	0	0	5.44e-06	0	1.4e-05	0	5.67e-06	4.67e-06	0	0	0	0	0	0.395235	0.520074	-0.11347
K01546	1.98e-05	1.65e-05	1.82e-05	4.26e-06	0	8.55e-06	6.67e-06	1.63e-05	7.3e-06	4.68e-06	0	0	9.34e-06	1.21e-05	1.63e-05	2.52e-05	0	0	0.39416	0.518798	0.25218
K05589	9.92e-06	3.31e-06	9.1e-06	4.26e-06	9.1e-06	1.28e-05	1e-05	5.44e-06	1.09e-05	4.68e-06	0	0	9.34e-06	6.07e-06	1.22e-05	1.89e-05	4.81e-06	0	0.393549	0.518134	0.318562
K06166	0	6.61e-06	0	8.52e-06	0	4.28e-06	0	5.44e-06	0	0	0	1.13e-05	4.67e-06	6.07e-06	4.07e-06	6.3e-06	0	5.92e-06	0.393441	0.518131	-0.214991
K06915	0.000119024	0.000195046	0.000177489	0.000208701	0.00020026	0.000158264	0.000186825	0.000146867	0.000211619	0.000182624	0.000152834	0.000260935	0.000205542	0.000200367	0.00015071	0.000207995	0.000144249	0.000230877	0.393431	0.518131	-1.16045
K18120	4.46e-05	4.63e-05	5.46e-05	5.54e-05	3.19e-05	2.99e-05	5.67e-05	5.44e-05	4.74e-05	4.68e-05	4.93e-05	7.94e-05	2.8e-05	6.07e-05	3.67e-05	4.41e-05	4.33e-05	9.47e-05	0.393306	0.518131	-0.671505
K02984	4.96e-06	1.98e-05	1.37e-05	8.52e-06	9.1e-06	8.55e-06	1.33e-05	2.18e-05	1.82e-05	1.4e-05	9.86e-06	3.4e-05	4.67e-06	2.43e-05	4.07e-06	2.52e-05	1.44e-05	1.78e-05	0.39317	0.518131	-0.402558
K13571	4.96e-06	0	0	0	0	0	3.34e-06	0	3.65e-06	4.68e-06	0	5.67e-06	0	0	0	0	4.81e-06	5.92e-06	0.392831	0.517885	-0.166365
K22579	4.96e-06	2.64e-05	9.1e-06	1.7e-05	1.37e-05	8.55e-06	1.67e-05	2.18e-05	1.82e-05	1.4e-05	1.48e-05	5.67e-06	1.87e-05	1.21e-05	1.22e-05	1.26e-05	1.44e-05	1.18e-05	0.392795	0.517885	0.577032
K03801	3.47e-05	4.3e-05	5.46e-05	2.13e-05	2.28e-05	2.14e-05	2.34e-05	4.9e-05	2.19e-05	9.37e-06	2.47e-05	1.13e-05	3.74e-05	4.86e-05	3.67e-05	4.41e-05	1.44e-05	1.18e-05	0.392663	0.517885	0.454328
K10536	4.46e-05	8.6e-05	5.92e-05	9.37e-05	9.56e-05	8.98e-05	8.01e-05	9.79e-05	6.57e-05	7.96e-05	5.92e-05	6.81e-05	5.61e-05	8.5e-05	9.78e-05	8.19e-05	5.77e-05	6.51e-05	0.392659	0.517885	1.01011
K19425	8.43e-05	0.000109093	7.28e-05	9.8e-05	0.00010013	0.000106935	0.00013011	0.000125109	0.000109458	9.37e-05	8.87e-05	0.000147485	0.000107442	0.000127506	0.000138491	8.82e-05	9.62e-05	0.000124318	0.392632	0.517885	-1.17799
K03227	4.96e-06	9.92e-06	4.55e-06	8.52e-06	9.1e-06	0	6.67e-06	5.44e-06	1.09e-05	4.68e-06	1.48e-05	5.67e-06	9.34e-06	1.21e-05	4.07e-06	1.26e-05	4.81e-06	5.92e-06	0.392336	0.517885	-0.443432
K00768	0.000243007	0.000228104	0.000336774	0.000281107	0.000259428	0.000299418	0.000270229	0.00033181	0.000291888	0.000346517	0.000285948	0.000260935	0.000280285	0.000285371	0.00032586	0.000296235	0.000317347	0.000266397	0.392132	0.517801	-1.95017
K07101	6.45e-05	6.61e-05	6.83e-05	4.69e-05	7.28e-05	5.56e-05	7.34e-05	5.98e-05	7.3e-05	6.09e-05	7.89e-05	6.24e-05	5.61e-05	9.11e-05	4.48e-05	0.000126057	5.77e-05	7.1e-05	0.391948	0.517698	-0.827622
K16960	5.46e-05	3.64e-05	4.1e-05	2.56e-05	3.64e-05	6.42e-05	5e-05	3.26e-05	4.38e-05	4.68e-05	3.45e-05	3.4e-05	4.2e-05	4.86e-05	3.67e-05	3.15e-05	4.81e-05	2.37e-05	0.391714	0.517528	0.872035
K01856	0	3.31e-06	1.37e-05	8.52e-06	0	0	0	0	0	0	0	0	0	6.07e-06	0	0	4.81e-06	0	0.39122	0.517014	0.115052
K00688	0.000833168	0.000790101	0.000814629	0.000775174	0.000882966	0.00085548	0.000837376	0.000875762	0.00085742	0.000805417	0.000769102	0.000862221	0.00079414	0.000862184	0.000879823	0.00081307	0.000812602	0.00078143	0.391163	0.517014	4.85629
K02322	4.96e-06	9.92e-06	4.55e-06	4.26e-06	4.55e-06	4.28e-06	6.67e-06	1.09e-05	7.3e-06	4.68e-06	9.86e-06	1.13e-05	0	1.21e-05	4.07e-06	1.26e-05	4.81e-06	1.18e-05	0.391147	0.517014	-0.43062
K03405	3.47e-05	1.98e-05	1.37e-05	3.83e-05	3.19e-05	3.85e-05	3.34e-05	3.26e-05	1.82e-05	1.87e-05	2.96e-05	3.97e-05	2.8e-05	3.04e-05	1.63e-05	2.52e-05	2.4e-05	1.78e-05	0.390824	0.51691	0.72476
K11206	1.49e-05	1.65e-05	3.19e-05	1.7e-05	1.37e-05	2.57e-05	2e-05	3.81e-05	2.19e-05	2.81e-05	2.47e-05	1.13e-05	1.87e-05	3.64e-05	1.22e-05	5.04e-05	3.37e-05	2.37e-05	0.390492	0.51661	-0.515919
K11753	0.000912517	0.000928947	0.000992118	0.000911468	0.000842004	0.000816983	0.000910771	0.00089752	0.000930392	0.000945897	0.000951517	0.000941636	0.000943625	0.000868256	0.000932775	0.000850887	0.000995317	0.000893909	0.388867	0.5146	-4.25017
K02336	4.96e-06	3.31e-06	0	0	0	0	6.67e-06	0	3.65e-06	4.68e-06	0	0	0	1.21e-05	0	1.26e-05	4.81e-06	0	0.38851	0.514267	-0.158381
K04760	1.49e-05	6.61e-06	2.28e-05	8.52e-06	9.1e-06	1.71e-05	6.67e-06	1.63e-05	7.3e-06	1.4e-05	4.93e-06	0	1.4e-05	1.21e-05	8.15e-06	1.89e-05	9.62e-06	5.92e-06	0.387918	0.513621	0.426233
K20485	4.96e-06	9.92e-06	2.28e-05	3.41e-05	3.19e-05	2.99e-05	2e-05	1.63e-05	2.19e-05	1.4e-05	1.48e-05	2.84e-05	1.87e-05	3.64e-05	2.85e-05	3.78e-05	1.92e-05	2.96e-05	0.384795	0.509624	-0.559366
K13889	4.96e-06	6.61e-06	1.82e-05	4.26e-06	9.1e-06	1.28e-05	1.67e-05	1.63e-05	1.09e-05	9.37e-06	1.48e-05	1.13e-05	2.8e-05	6.07e-06	1.63e-05	6.3e-06	1.92e-05	1.18e-05	0.384527	0.509407	-0.455167
K02191	0	9.92e-06	1.37e-05	8.52e-06	4.55e-06	4.28e-06	6.67e-06	0	3.65e-06	4.68e-06	0	5.67e-06	0	1.21e-05	0	6.3e-06	0	5.92e-06	0.382794	0.507249	0.247868
K02899	0.0011704	0.00121325	0.00113775	0.00117554	0.00122887	0.00112496	0.00113096	0.00105526	0.00118579	0.0011613	0.00116844	0.00110614	0.00115851	0.00111112	0.00103461	0.00117864	0.00106263	0.00122543	0.381765	0.506022	4.59709
K02437	0.000307479	0.000254551	0.000286713	0.000200182	0.000168401	0.000226702	0.000283573	0.000299173	0.000277293	0.000206037	0.000261297	0.000221228	0.000214885	0.000309658	0.000158857	0.000271023	0.000192332	0.000284156	0.381191	0.505398	1.15601
K03293	1.49e-05	2.64e-05	1.37e-05	2.13e-05	2.73e-05	1.71e-05	1.67e-05	1.63e-05	1.82e-05	1.87e-05	9.86e-06	1.7e-05	2.34e-05	1.82e-05	8.15e-06	1.89e-05	1.44e-05	2.37e-05	0.381044	0.50534	0.798843
K02990	0.0013043	0.00128267	0.00128338	0.0012522	0.00134266	0.0013816	0.00124439	0.00116406	0.00125147	0.0012971	0.00140509	0.00121392	0.00126128	0.00118399	0.00114866	0.00121645	0.00118284	0.00132014	0.380385	0.504602	3.9688
K19138	2.48e-05	4.63e-05	2.73e-05	3.83e-05	2.73e-05	2.99e-05	3.34e-05	7.62e-05	3.65e-05	2.34e-05	4.93e-05	3.97e-05	3.74e-05	6.68e-05	5.3e-05	4.41e-05	3.37e-05	4.74e-05	0.378438	0.502156	-0.65417
K01595	4.96e-06	0	4.55e-06	4.26e-06	4.55e-06	4.28e-06	3.34e-06	0	3.65e-06	4.68e-06	0	5.67e-06	4.67e-06	6.07e-06	0	6.3e-06	4.81e-06	5.92e-06	0.378349	0.502156	-0.387403
K03110	0.00105138	0.00107771	0.00101942	0.00101795	0.0010104	0.0010608	0.00103754	0.000946475	0.000999715	0.00108638	0.00109449	0.00103807	0.00110713	0.00104434	0.000936848	0.00101476	0.000995317	0.00108927	0.378248	0.502156	-4.91112
K03981	1.49e-05	1.32e-05	1.82e-05	1.28e-05	1.37e-05	1.71e-05	1.33e-05	1.63e-05	1.46e-05	2.34e-05	1.48e-05	5.67e-06	1.87e-05	2.43e-05	2.04e-05	3.78e-05	1.92e-05	0	0.377826	0.501752	-0.483692
K21471	0.000109105	6.28e-05	9.1e-05	8.94e-05	0.00013199	0.00011549	0.000120102	0.000146867	8.76e-05	8.43e-05	5.92e-05	8.51e-05	0.000126128	6.07e-05	0.000179223	3.78e-05	0.000129824	4.74e-05	0.377733	0.501752	0.59656
K09013	0.000729022	0.000757042	0.000709956	0.0007411	0.000805593	0.000731435	0.000710602	0.000679939	0.000722422	0.000782004	0.000774032	0.000686373	0.000710055	0.000716463	0.000651721	0.000712224	0.00062027	0.000757751	0.377148	0.501124	3.61758
K15586	2.98e-05	2.31e-05	2.73e-05	2.56e-05	3.19e-05	2.57e-05	2.34e-05	5.44e-05	2.92e-05	2.81e-05	1.48e-05	2.84e-05	3.74e-05	3.64e-05	2.44e-05	2.52e-05	2.88e-05	1.18e-05	0.376278	0.500103	0.709124
K13954	4.96e-06	1.32e-05	1.82e-05	2.98e-05	1.37e-05	2.99e-05	2e-05	2.72e-05	1.82e-05	3.28e-05	9.86e-06	3.4e-05	2.34e-05	2.43e-05	4.89e-05	1.26e-05	1.92e-05	1.18e-05	0.375698	0.499468	-0.463806
K08077	4.96e-06	3.31e-06	9.1e-06	4.26e-06	4.55e-06	4.28e-06	3.34e-06	0	7.3e-06	4.68e-06	0	5.67e-06	9.34e-06	6.07e-06	4.07e-06	1.89e-05	9.62e-06	0	0.375623	0.499468	-0.28452
K03177	0.00105634	0.00110085	0.000987567	0.00103073	0.00113329	0.00106935	0.00108759	0.000951915	0.00106904	0.00112384	0.00108463	0.00102105	0.00108844	0.00103826	0.00105905	0.00103997	0.00106744	0.00116031	0.375245	0.499137	-4.82621
K02978	4.96e-06	1.32e-05	9.1e-06	4.26e-06	4.55e-06	8.55e-06	1.33e-05	1.09e-05	1.09e-05	9.37e-06	9.86e-06	1.7e-05	4.67e-06	1.21e-05	4.07e-06	1.89e-05	4.81e-06	1.78e-05	0.374102	0.497753	-0.469465
K05966	1.49e-05	2.98e-05	3.19e-05	1.7e-05	1.82e-05	2.14e-05	2.67e-05	1.63e-05	2.55e-05	2.81e-05	2.47e-05	2.27e-05	9.34e-06	1.21e-05	1.63e-05	2.52e-05	1.44e-05	2.37e-05	0.373	0.496421	0.749899
K02554	0	0	0	0	0	0	6.67e-06	0	0	0	0	5.67e-06	0	0	0	0	4.81e-06	5.92e-06	0.372562	0.495972	-0.118483
K04069	0.00150268	0.00160665	0.00138806	0.00126498	0.00142913	0.00138588	0.00155131	0.0015557	0.00148133	0.00161552	0.00146918	0.00150889	0.00156025	0.00137221	0.0015071	0.00138033	0.00170694	0.00146222	0.371883	0.495203	-3.21486
K07731	4.96e-06	6.61e-06	4.55e-06	4.26e-06	4.55e-06	8.55e-06	6.67e-06	1.09e-05	7.3e-06	4.68e-06	9.86e-06	1.13e-05	4.67e-06	1.21e-05	4.07e-06	1.26e-05	4.81e-06	5.92e-06	0.371877	0.495203	-0.551653
K09148	4.96e-06	6.61e-06	4.55e-06	4.26e-06	4.55e-06	8.55e-06	6.67e-06	1.09e-05	7.3e-06	4.68e-06	9.86e-06	1.13e-05	4.67e-06	1.21e-05	4.07e-06	1.26e-05	4.81e-06	5.92e-06	0.371877	0.495203	-0.551653
K09737	4.96e-06	6.61e-06	4.55e-06	4.26e-06	4.55e-06	8.55e-06	6.67e-06	1.09e-05	7.3e-06	4.68e-06	9.86e-06	1.13e-05	4.67e-06	1.21e-05	4.07e-06	1.26e-05	4.81e-06	5.92e-06	0.371877	0.495203	-0.551653
K13831	4.96e-06	6.61e-06	4.55e-06	4.26e-06	4.55e-06	8.55e-06	6.67e-06	1.09e-05	7.3e-06	4.68e-06	9.86e-06	1.13e-05	4.67e-06	1.21e-05	4.07e-06	1.26e-05	4.81e-06	5.92e-06	0.371877	0.495203	-0.551653
K13921	1.98e-05	1.98e-05	4.1e-05	4.26e-05	2.73e-05	1.71e-05	3.67e-05	2.72e-05	3.65e-05	3.75e-05	4.44e-05	3.97e-05	4.2e-05	1.82e-05	4.48e-05	6.3e-06	6.73e-05	2.37e-05	0.371538	0.495203	-0.531338
K09812	0.000848046	0.000833077	0.000814629	0.000843321	0.000873863	0.00093675	0.000830703	0.000875762	0.000839177	0.000866291	0.000808543	0.000782806	0.000929611	0.000819682	0.00085131	0.000800464	0.000855876	0.00082287	0.37128	0.495203	4.84681
K01792	2.98e-05	2.64e-05	2.28e-05	2.98e-05	2.73e-05	1.71e-05	3.34e-05	2.72e-05	2.92e-05	1.87e-05	2.47e-05	3.4e-05	9.34e-06	3.64e-05	8.15e-06	3.15e-05	1.92e-05	2.96e-05	0.370892	0.494826	0.728163
K13767	0	0	4.55e-06	4.26e-06	0	0	0	0	3.65e-06	4.68e-06	0	5.67e-06	0	0	0	6.3e-06	0	5.92e-06	0.370728	0.494742	-0.174444
K00140	4.46e-05	2.64e-05	2.28e-05	2.98e-05	1.82e-05	1.71e-05	2e-05	5.44e-05	2.19e-05	4.21e-05	3.45e-05	3.97e-05	3.27e-05	3.04e-05	4.07e-05	2.52e-05	3.37e-05	1.78e-05	0.370118	0.494062	-0.669718
K19005	0.000133902	8.93e-05	0.000131979	0.000102221	8.65e-05	0.000119767	8.34e-05	0.000119669	9.12e-05	0.000103018	7.4e-05	7.37e-05	0.000135471	7.89e-05	0.000101831	8.82e-05	0.000129824	8.88e-05	0.369599	0.493504	1.10035
K08310	4.46e-05	5.62e-05	3.19e-05	4.69e-05	3.19e-05	2.99e-05	4.67e-05	1.63e-05	5.47e-05	5.62e-05	3.94e-05	5.11e-05	3.27e-05	6.07e-05	4.07e-05	5.67e-05	2.4e-05	4.74e-05	0.368961	0.492788	-0.782028
K21744	0	0	0	0	0	0	3.34e-06	0	3.65e-06	4.68e-06	4.93e-06	5.67e-06	0	0	0	0	0	0	0.368928	0.492788	-0.136243
K07270	2.48e-05	1.32e-05	2.73e-05	1.28e-05	1.82e-05	2.14e-05	2e-05	1.63e-05	2.19e-05	1.87e-05	1.48e-05	2.27e-05	2.34e-05	4.25e-05	2.04e-05	3.15e-05	1.92e-05	1.18e-05	0.368704	0.492713	-0.664451
K20340	0	3.31e-06	4.55e-06	8.52e-06	1.37e-05	4.28e-06	3.34e-06	5.44e-06	3.65e-06	9.37e-06	4.93e-06	5.67e-06	0	6.07e-06	0	1.26e-05	9.62e-06	1.78e-05	0.368504	0.49258	-0.297521
K05311	2.48e-05	3.31e-05	2.73e-05	5.11e-05	3.19e-05	2.99e-05	4.34e-05	3.26e-05	3.65e-05	2.34e-05	2.96e-05	5.67e-05	1.87e-05	6.68e-05	2.44e-05	8.19e-05	3.85e-05	3.55e-05	0.368267	0.492397	-0.537601
K06962	7.44e-05	8.6e-05	6.37e-05	8.09e-05	8.19e-05	6.84e-05	8.67e-05	5.44e-05	6.57e-05	7.02e-05	0.000108463	9.64e-05	4.2e-05	0.000145721	6.11e-05	0.000113452	5.77e-05	6.51e-05	0.368112	0.492324	-0.738206
K01075	4.96e-06	3.31e-06	0	0	0	4.28e-06	0	5.44e-06	0	0	4.93e-06	5.67e-06	0	6.07e-06	0	6.3e-06	0	5.92e-06	0.36753	0.491681	-0.219371
K16087	9.92e-06	3.31e-06	9.1e-06	8.52e-06	9.1e-06	8.55e-06	6.67e-06	5.44e-06	7.3e-06	9.37e-06	0	0	9.34e-06	1.21e-05	4.07e-06	1.26e-05	4.81e-06	0	0.367098	0.491237	0.393192
K02195	9.92e-06	9.92e-06	4.55e-06	8.52e-06	9.1e-06	8.55e-06	1e-05	1.63e-05	7.3e-06	1.87e-05	9.86e-06	1.13e-05	9.34e-06	0	8.15e-06	1.89e-05	1.44e-05	1.18e-05	0.366226	0.490204	-0.523169
K07166	0.000659591	0.000674396	0.000659895	0.000707027	0.000719117	0.000710048	0.000703929	0.000712576	0.000718773	0.000697716	0.000739521	0.000675028	0.000644655	0.000698248	0.000761698	0.000718527	0.000798177	0.000680792	0.365645	0.48956	-4.3736
K07562	4.96e-06	9.92e-06	4.55e-06	4.26e-06	4.55e-06	8.55e-06	1.67e-05	1.09e-05	3.65e-06	4.68e-06	9.86e-06	1.7e-05	4.67e-06	1.21e-05	4.07e-06	1.26e-05	4.81e-06	1.78e-05	0.365415	0.489386	-0.409542
K12269	4.96e-06	3.31e-06	0	0	4.55e-06	1.28e-05	6.67e-06	0	1.46e-05	0	0	0	9.34e-06	0	8.15e-06	0	4.81e-06	5.92e-06	0.365257	0.489309	0.207101
K06001	0.000357072	0.000419844	0.000377733	0.000327958	0.000327699	0.000372134	0.000447045	0.000435161	0.000419589	0.000412074	0.000399341	0.000419765	0.000345685	0.000412877	0.000427692	0.000397081	0.00042313	0.000390715	0.364902	0.488967	-2.54416
K07308	1.49e-05	6.61e-06	9.1e-06	1.7e-05	9.1e-06	1.28e-05	6.67e-06	5.44e-06	1.09e-05	1.4e-05	4.93e-06	0	4.67e-06	6.07e-06	0	0	2.88e-05	5.92e-06	0.364888	0.488967	0.287582
K00172	0.000178536	0.000211575	0.000200244	0.000208701	0.000213914	0.000320805	0.000186825	0.000206701	0.000171484	0.000201354	0.000202136	0.000192865	0.000224228	0.000170008	0.000215882	0.000195389	0.00016829	0.000195358	0.364427	0.488597	1.42016
K03783	0.000560405	0.000489268	0.000577977	0.000515363	0.000505202	0.000496178	0.000527113	0.000522193	0.000510803	0.000524458	0.000537385	0.000504853	0.000504513	0.000516096	0.000549889	0.000485321	0.00045198	0.000515034	0.364097	0.488289	4.18104
K02250	5.46e-05	5.95e-05	5.92e-05	6.39e-05	5.01e-05	4.71e-05	4.67e-05	2.72e-05	4.38e-05	4.21e-05	2.96e-05	3.97e-05	5.61e-05	7.29e-05	1.63e-05	6.3e-05	1.44e-05	5.33e-05	0.363898	0.488156	0.67165
K02528	0.00118032	0.00116366	0.00111499	0.00115424	0.0011515	0.00116345	0.00115765	0.00104439	0.00109823	0.00118939	0.00121281	0.00112883	0.00110713	0.00110505	0.00112422	0.00115973	0.00113476	0.00125503	0.363556	0.487831	-5.67698
K07096	3.47e-05	2.64e-05	2.73e-05	1.7e-05	2.28e-05	2.14e-05	3.67e-05	3.26e-05	3.28e-05	1.87e-05	3.45e-05	2.27e-05	9.34e-06	3.64e-05	1.22e-05	3.78e-05	1.44e-05	2.96e-05	0.363541	0.487831	0.671836
K02987	9.92e-06	1.32e-05	9.1e-06	4.26e-06	1.82e-05	1.28e-05	1.33e-05	1.63e-05	1.09e-05	9.37e-06	1.48e-05	2.84e-05	9.34e-06	1.21e-05	8.15e-06	1.89e-05	4.81e-06	2.96e-05	0.36278	0.487056	-0.460502
K13006	0	0	4.55e-06	4.26e-06	0	4.28e-06	6.67e-06	0	3.65e-06	0	4.93e-06	0	4.67e-06	0	4.07e-06	0	0	0	0.36258	0.486922	0.19812
K06165	0	3.31e-06	0	4.26e-06	0	8.55e-06	0	5.44e-06	0	0	0	1.13e-05	4.67e-06	6.07e-06	8.15e-06	6.3e-06	0	0	0.361633	0.485783	-0.203123
K21562	9.92e-06	6.61e-06	0	8.52e-06	9.1e-06	2.14e-05	6.67e-06	1.63e-05	1.09e-05	9.37e-06	0	5.67e-06	4.67e-06	6.07e-06	0	1.26e-05	9.62e-06	1.78e-05	0.361376	0.485572	0.343666
K10798	1.49e-05	1.98e-05	9.1e-06	1.28e-05	3.19e-05	1.71e-05	1e-05	5.44e-06	7.3e-06	3.75e-05	1.48e-05	1.13e-05	2.34e-05	3.04e-05	2.04e-05	6.3e-06	9.62e-06	1.18e-05	0.361376	0.485572	-0.413333
K05813	5.46e-05	7.6e-05	7.28e-05	9.8e-05	8.19e-05	5.13e-05	8.01e-05	0.000130548	8.76e-05	5.15e-05	6.9e-05	5.11e-05	7.01e-05	0.000109291	6.92e-05	0.000107149	4.81e-05	6.51e-05	0.361283	0.485572	0.778372
K03310	0.00130926	0.00138185	0.00137895	0.00123943	0.00116515	0.00117628	0.00136783	0.00139795	0.00134633	0.00125495	0.00127691	0.00115719	0.00129865	0.00119006	0.00144193	0.00117864	0.00142326	0.00113663	0.361237	0.485572	2.98848
K03893	5.95e-05	8.6e-05	9.1e-05	8.09e-05	7.28e-05	4.71e-05	7.67e-05	8.7e-05	9.12e-05	9.37e-05	8.38e-05	7.94e-05	7.94e-05	5.46e-05	3.26e-05	4.41e-05	8.65e-05	6.51e-05	0.35987	0.484079	0.945217
K01647	0.000451299	0.000459515	0.0004551	0.000481289	0.000587127	0.000530397	0.000487079	0.000592907	0.000488912	0.00052914	0.000488084	0.000510525	0.000537212	0.000461451	0.000708746	0.000466412	0.000658736	0.000467674	0.359821	0.484079	-1.67373
K11631	0	0	0	4.26e-06	0	0	3.34e-06	0	0	0	0	0	4.67e-06	6.07e-06	0	6.3e-06	0	0	0.359412	0.483729	-0.137592
K00808	0	1.32e-05	9.1e-06	0	0	8.55e-06	0	0	3.65e-06	0	4.93e-06	0	4.67e-06	1.21e-05	0	1.26e-05	9.62e-06	1.18e-05	0.359297	0.483707	-0.224226
K19333	0	0	4.55e-06	0	0	4.28e-06	3.34e-06	5.44e-06	0	0	4.93e-06	0	9.34e-06	0	4.07e-06	6.3e-06	4.81e-06	0	0.359284	0.483707	-0.209629
K03389	0.000208292	0.00023141	0.000222999	0.000238515	0.000191158	0.000205315	0.000210178	0.000244778	0.000193376	0.000271594	0.000216926	0.0002269	0.000219556	0.000230725	0.000207736	0.000226903	0.000240415	0.000189438	0.358997	0.483569	-2.49435
K03825	0	0	0	0	0	0	3.34e-06	0	0	0	4.93e-06	0	0	0	0	0	0	5.92e-06	0.358913	0.483569	-0.0998034
K13598	0	3.31e-06	0	8.52e-06	4.55e-06	4.28e-06	3.34e-06	0	3.65e-06	0	0	0	0	6.07e-06	4.07e-06	6.3e-06	0	0	0.358873	0.483569	0.207782
K22373	3.97e-05	5.62e-05	7.74e-05	7.24e-05	2.73e-05	2.57e-05	5.67e-05	3.81e-05	4.01e-05	5.15e-05	4.93e-05	8.51e-05	5.61e-05	6.07e-05	2.85e-05	6.93e-05	4.33e-05	5.92e-05	0.35881	0.483569	-0.713146
K13288	9.92e-06	6.61e-06	1.37e-05	8.52e-06	9.1e-06	2.14e-05	1.33e-05	5.44e-06	1.46e-05	2.34e-05	9.86e-06	1.13e-05	9.34e-06	1.21e-05	1.22e-05	1.26e-05	1.92e-05	1.18e-05	0.358266	0.483117	-0.618609
K03931	1.98e-05	2.98e-05	2.28e-05	1.7e-05	2.28e-05	2.57e-05	3e-05	4.9e-05	3.65e-05	2.34e-05	3.45e-05	2.84e-05	2.34e-05	2.43e-05	2.85e-05	3.78e-05	4.33e-05	4.74e-05	0.358185	0.483117	-0.767033
K16951	0	1.98e-05	9.1e-06	4.26e-06	1.37e-05	4.28e-06	3.34e-06	1.09e-05	1.09e-05	1.87e-05	9.86e-06	0	1.4e-05	1.21e-05	1.22e-05	6.3e-06	1.44e-05	1.18e-05	0.358077	0.483117	-0.40333
K00917	7.44e-05	3.97e-05	3.64e-05	6.81e-05	6.37e-05	4.28e-05	8.67e-05	5.98e-05	9.85e-05	2.81e-05	7.4e-05	5.67e-05	6.07e-05	5.46e-05	7.33e-05	3.78e-05	5.77e-05	5.33e-05	0.357463	0.482432	0.766633
K07142	4.96e-06	1.32e-05	4.55e-06	4.26e-06	4.55e-06	0	1.33e-05	1.09e-05	7.3e-06	4.68e-06	9.86e-06	1.7e-05	4.67e-06	1.21e-05	4.07e-06	1.26e-05	4.81e-06	1.18e-05	0.356823	0.481701	-0.414823
K22441	2.98e-05	9.92e-06	1.82e-05	1.7e-05	2.28e-05	1.71e-05	1.67e-05	1.09e-05	1.46e-05	0	9.86e-06	2.27e-05	4.67e-06	1.21e-05	4.07e-06	6.3e-06	4.81e-06	4.74e-05	0.356411	0.481277	0.318103
K08600	0.00122	0.0011835	0.00112865	0.00129054	0.0013108	0.00123617	0.00115765	0.0010879	0.00125877	0.00118939	0.00114379	0.0012593	0.00119588	0.00110505	0.00123827	0.00104628	0.00120207	0.00120766	0.356278	0.481231	4.00259
K12349	0	6.61e-06	0	0	0	4.28e-06	0	0	0	9.37e-06	0	0	0	0	0	0	4.81e-06	1.18e-05	0.355968	0.480945	-0.130606
K00980	0.000262845	0.000204963	0.000245754	0.000289625	0.000282185	0.000333637	0.000256884	0.000288294	0.000255402	0.00022945	0.000187345	0.000192865	0.000322327	0.000303586	0.000285128	0.000226903	0.000283689	0.000213117	0.35554	0.480499	1.42563
K00737	4.96e-05	3.97e-05	4.1e-05	2.98e-05	3.19e-05	2.99e-05	6.01e-05	3.81e-05	6.57e-05	3.75e-05	4.44e-05	5.11e-05	3.27e-05	4.25e-05	3.26e-05	3.78e-05	4.33e-05	1.78e-05	0.355324	0.48034	0.843423
K02889	4.96e-06	1.65e-05	1.37e-05	1.28e-05	9.1e-06	8.55e-06	1.67e-05	2.18e-05	1.46e-05	4.68e-06	9.86e-06	2.84e-05	4.67e-06	6.07e-06	4.07e-06	6.3e-06	9.62e-06	1.78e-05	0.354735	0.479676	0.414504
K10979	1.98e-05	4.3e-05	1.37e-05	1.28e-05	2.73e-05	4.28e-06	1.33e-05	5.44e-06	1.82e-05	4.68e-06	9.86e-06	2.84e-05	4.67e-06	1.21e-05	1.22e-05	1.89e-05	0	2.37e-05	0.354164	0.479036	0.338574
K06426	2.48e-05	3.31e-05	4.1e-05	2.98e-05	3.19e-05	1.71e-05	1.33e-05	3.26e-05	1.46e-05	2.81e-05	4.93e-05	4.54e-05	2.8e-05	3.04e-05	1.63e-05	2.52e-05	1.44e-05	4.74e-05	0.353758	0.47862	-0.608877
K16294	0	0	0	4.26e-06	4.55e-06	4.28e-06	3.34e-06	0	0	4.68e-06	4.93e-06	0	0	6.07e-06	0	6.3e-06	4.81e-06	0	0.353464	0.478354	-0.225268
K01597	0	6.61e-06	4.55e-06	8.52e-06	9.1e-06	1.28e-05	3.34e-06	0	0	9.37e-06	4.93e-06	1.13e-05	0	1.82e-05	4.07e-06	6.3e-06	4.81e-06	5.92e-06	0.353173	0.478092	-0.297147
K06386	4.46e-05	7.6e-05	6.83e-05	5.54e-05	7.28e-05	3.42e-05	4.34e-05	3.81e-05	6.2e-05	6.09e-05	5.42e-05	0.000102105	7.01e-05	6.68e-05	2.85e-05	7.56e-05	3.37e-05	8.29e-05	0.352998	0.477988	-0.723266
K07068	1.49e-05	2.98e-05	2.28e-05	1.7e-05	4.1e-05	1.71e-05	3e-05	2.72e-05	3.65e-05	3.75e-05	1.97e-05	3.97e-05	3.27e-05	3.64e-05	2.44e-05	3.15e-05	2.4e-05	2.37e-05	0.352352	0.477244	-0.824036
K19167	0.000143821	0.000145458	0.00013653	0.000166109	0.000186606	0.000188206	0.000143455	0.000163185	0.00015689	0.000168576	0.000138044	0.000170175	0.000196199	0.000109291	0.00016293	8.82e-05	0.000125016	0.000159838	0.351981	0.476874	1.33319
K00640	0.0010613	0.000981841	0.00106038	0.00108184	0.00104226	0.00101802	0.00101086	0.00112598	0.00098877	0.00101614	0.00103533	0.000935963	0.00105107	0.00103826	0.00104275	0.00102737	0.00100012	0.00105375	0.351124	0.475845	5.93779
K02194	9.92e-06	9.92e-06	9.1e-06	8.52e-06	9.1e-06	4.28e-06	6.67e-06	1.63e-05	7.3e-06	1.4e-05	1.48e-05	0	4.67e-06	6.07e-06	8.15e-06	6.3e-06	4.81e-06	5.92e-06	0.350716	0.475424	0.485804
K00555	4.96e-06	1.65e-05	9.1e-06	4.26e-06	4.55e-06	8.55e-06	1.33e-05	1.63e-05	7.3e-06	9.37e-06	1.48e-05	1.7e-05	4.67e-06	2.43e-05	4.07e-06	1.26e-05	4.81e-06	1.78e-05	0.350356	0.475067	-0.431746
K05770	0.000401706	0.000459515	0.000350427	0.000430179	0.000355007	0.000457682	0.000380322	0.000310052	0.0003904	0.000379295	0.000409202	0.000380058	0.00042977	0.000412877	0.000427692	0.000441201	0.000384663	0.000432155	0.349732	0.474353	-2.45292
K02495	1.49e-05	1.65e-05	9.1e-06	2.13e-05	2.28e-05	1.28e-05	2e-05	1.63e-05	1.46e-05	2.34e-05	4.93e-06	0	1.4e-05	1.21e-05	2.04e-05	2.52e-05	1.44e-05	5.92e-06	0.349684	0.474353	0.526995
K12684	0	3.31e-06	0	4.26e-06	4.55e-06	0	0	0	0	4.68e-06	0	0	0	0	0	0	0	0	0.34942	0.474192	0.123937
K00675	2.98e-05	5.29e-05	6.37e-05	5.54e-05	4.55e-05	5.99e-05	4.34e-05	5.44e-05	4.38e-05	7.02e-05	5.92e-05	6.81e-05	4.2e-05	6.07e-05	5.3e-05	5.67e-05	4.81e-05	3.55e-05	0.349125	0.473923	-1.15841
K03673	9.92e-06	1.32e-05	2.28e-05	4.26e-06	4.55e-06	8.55e-06	6.67e-06	1.09e-05	7.3e-06	4.68e-06	0	0	9.34e-06	6.07e-06	1.22e-05	1.26e-05	9.62e-06	1.18e-05	0.348471	0.473166	0.389664
K09118	6.45e-05	3.31e-05	2.73e-05	1.7e-05	4.55e-05	7.27e-05	2e-05	1.63e-05	3.28e-05	8.43e-05	3.45e-05	2.84e-05	6.54e-05	4.25e-05	3.67e-05	3.15e-05	2.88e-05	5.92e-05	0.348006	0.472666	-0.497878
K22452	0	0	9.1e-06	0	0	0	0	0	0	4.68e-06	0	5.67e-06	0	0	0	0	4.81e-06	5.92e-06	0.348002	0.472666	-0.139063
K01205	6.45e-05	6.94e-05	8.19e-05	6.39e-05	5.01e-05	8.55e-05	4e-05	5.98e-05	5.47e-05	5.62e-05	5.92e-05	5.67e-05	6.07e-05	4.25e-05	7.74e-05	3.15e-05	8.65e-05	2.96e-05	0.34735	0.472037	0.852175
K20490	1.49e-05	9.92e-06	1.82e-05	1.7e-05	9.1e-06	2.99e-05	1e-05	2.72e-05	1.09e-05	1.87e-05	9.86e-06	1.7e-05	1.4e-05	1.21e-05	1.22e-05	1.26e-05	1.92e-05	5.92e-06	0.347305	0.472037	0.582391
K07278	4.96e-06	6.61e-06	9.1e-06	8.52e-06	9.1e-06	8.55e-06	0	5.44e-06	0	0	0	0	0	1.21e-05	8.15e-06	1.26e-05	0	0	0.346841	0.471607	0.242991
K17316	0	6.61e-06	4.55e-06	8.52e-06	9.1e-06	4.28e-06	1.33e-05	0	3.65e-06	9.37e-06	4.93e-06	5.67e-06	9.34e-06	6.07e-06	1.22e-05	6.3e-06	4.81e-06	5.92e-06	0.346803	0.471607	-0.435465
K13052	0.000128943	0.000102482	0.000122877	9.8e-05	9.56e-05	0.000111212	9.34e-05	0.000119669	8.39e-05	7.49e-05	6.9e-05	6.81e-05	0.000116785	7.89e-05	0.000171077	7.56e-05	0.000134632	4.14e-05	0.346637	0.471592	0.788926
K02407	0.000133902	0.000119011	9.56e-05	0.000153331	0.000223017	0.000205315	0.000213514	0.000244778	0.000200673	0.000112384	0.000147904	0.000187193	0.000158828	0.000145721	0.000232175	0.000144966	0.000173099	9.47e-05	0.346124	0.471026	0.864274
K06953	9.92e-06	1.65e-05	9.1e-06	8.52e-06	9.1e-06	1.71e-05	1.33e-05	2.18e-05	1.46e-05	9.37e-06	1.97e-05	1.7e-05	9.34e-06	3.04e-05	8.15e-06	2.52e-05	9.62e-06	1.78e-05	0.34562	0.47047	-0.557586
K07732	9.92e-06	1.32e-05	1.37e-05	8.52e-06	4.55e-06	1.71e-05	1.33e-05	1.09e-05	7.3e-06	4.68e-06	1.48e-05	2.27e-05	9.34e-06	1.82e-05	4.07e-06	1.89e-05	4.81e-06	2.96e-05	0.345504	0.470443	-0.439664
K19712	4.96e-06	9.92e-06	4.55e-06	8.52e-06	4.55e-06	8.55e-06	1.33e-05	1.09e-05	1.09e-05	4.68e-06	9.86e-06	1.13e-05	9.34e-06	1.21e-05	4.07e-06	1.26e-05	9.62e-06	1.78e-05	0.345428	0.470443	-0.61391
K01829	0	0	0	0	0	0	0	0	3.65e-06	0	0	0	0	6.07e-06	0	6.3e-06	0	0	0.344977	0.469987	-0.102657
K19504	9.92e-06	6.61e-06	0	8.52e-06	9.1e-06	8.55e-06	6.67e-06	0	7.3e-06	4.68e-06	4.93e-06	2.27e-05	0	6.07e-06	8.15e-06	6.3e-06	1.44e-05	1.18e-05	0.344639	0.469656	-0.339579
K01000	0.00111089	0.00105126	0.00101942	0.00108184	0.00111964	0.00108646	0.00105756	0.00103351	0.00107634	0.00105828	0.00110928	0.00104374	0.00113515	0.00108684	0.00104683	0.00106518	0.00108187	0.00116623	0.343805	0.468651	-6.97129
K20345	2.48e-05	2.31e-05	2.73e-05	2.13e-05	3.19e-05	3.42e-05	4.67e-05	2.72e-05	2.92e-05	9.37e-06	2.47e-05	0	4.2e-05	3.64e-05	4.48e-05	2.52e-05	2.88e-05	0	0.34347	0.468324	0.49264
K01812	0.000441381	0.00043968	0.000341325	0.000408883	0.000455137	0.000414908	0.000407011	0.000478677	0.00041594	0.000398026	0.000384551	0.00038573	0.000490498	0.000358231	0.000484717	0.000315143	0.000432746	0.000343356	0.342976	0.467781	1.9844
K03056	4.96e-06	9.92e-06	9.1e-06	4.26e-06	4.55e-06	8.55e-06	1e-05	1.09e-05	1.09e-05	9.37e-06	9.86e-06	1.13e-05	4.67e-06	1.21e-05	4.07e-06	1.26e-05	9.62e-06	1.18e-05	0.341657	0.466113	-0.732857
K01090	2.48e-05	3.97e-05	2.28e-05	2.98e-05	5.46e-05	3.42e-05	1.33e-05	4.35e-05	1.09e-05	4.21e-05	2.47e-05	6.81e-05	1.87e-05	6.68e-05	1.63e-05	3.78e-05	1.92e-05	5.33e-05	0.341261	0.465701	-0.47957
K02835	0.00104146	0.00105126	0.00103763	0.00101369	0.00105592	0.000979524	0.00098083	0.00089208	0.00101796	0.00102082	0.00105505	0.000987016	0.00105574	0.00103826	0.000957215	0.00102737	0.00103378	0.00108335	0.341133	0.465658	-5.5254
K18431	3.97e-05	2.31e-05	1.37e-05	2.98e-05	4.1e-05	3.85e-05	3.67e-05	3.26e-05	3.28e-05	3.28e-05	2.47e-05	2.84e-05	2.34e-05	3.04e-05	2.44e-05	3.15e-05	3.85e-05	2.37e-05	0.3409	0.465469	1.0298
K01265	0.00142333	0.00134549	0.00122877	0.00133313	0.001329	0.00150564	0.00133446	0.00120757	0.00134633	0.0012409	0.00139523	0.00125362	0.00139675	0.00122042	0.00130751	0.0013299	0.00131266	0.00127278	0.340695	0.465319	4.17392
K03286	4.46e-05	3.97e-05	5.01e-05	3.41e-05	4.1e-05	2.99e-05	5.67e-05	8.7e-05	5.84e-05	2.81e-05	2.47e-05	4.54e-05	8.41e-05	9.11e-05	7.33e-05	0.000113452	5.77e-05	2.96e-05	0.340354	0.464982	-0.531357
K18210	4.96e-06	9.92e-06	4.55e-06	4.26e-06	4.55e-06	4.28e-06	6.67e-06	5.44e-06	3.65e-06	4.68e-06	4.93e-06	1.13e-05	4.67e-06	6.07e-06	4.07e-06	6.3e-06	4.81e-06	1.18e-05	0.340208	0.464913	-0.588373
K01494	4.46e-05	7.27e-05	5.01e-05	7.67e-05	6.83e-05	5.56e-05	8.34e-05	7.07e-05	8.76e-05	6.09e-05	6.41e-05	7.94e-05	4.2e-05	7.29e-05	4.07e-05	7.56e-05	3.85e-05	7.1e-05	0.339587	0.464194	1.02078
K00383	0	6.61e-06	4.55e-06	0	1.37e-05	8.55e-06	6.67e-06	5.44e-06	1.09e-05	1.4e-05	9.86e-06	1.7e-05	0	6.07e-06	0	0	1.44e-05	2.37e-05	0.33905	0.463589	-0.282932
K06153	0.00119024	0.00119672	0.00118781	0.00119257	0.00124252	0.00121906	0.00117433	0.0010879	0.00118214	0.00117535	0.00121281	0.00120257	0.00119588	0.00119006	0.0012179	0.00118494	0.00120207	0.00122543	0.338568	0.46306	-9.2115
K00874	0.000714144	0.000757042	0.000673548	0.000775174	0.0006645	0.000697216	0.000683912	0.000788729	0.000740665	0.000660255	0.000739521	0.00072608	0.000742755	0.00077718	0.000855383	0.00076895	0.000798177	0.000657112	0.338519	0.46306	-3.28948
K03586	4.96e-06	3.31e-06	4.55e-06	4.26e-06	4.55e-06	4.28e-06	3.34e-06	5.44e-06	3.65e-06	9.37e-06	4.93e-06	0	9.34e-06	6.07e-06	8.15e-06	6.3e-06	4.81e-06	0	0.338441	0.46306	-0.471185
K02080	0	0	0	0	4.55e-06	0	0	5.44e-06	0	4.68e-06	4.93e-06	0	0	0	0	0	4.81e-06	5.92e-06	0.338055	0.462746	-0.16837
K07049	4.96e-06	6.61e-06	9.1e-06	4.26e-06	4.55e-06	8.55e-06	6.67e-06	1.09e-05	7.3e-06	4.68e-06	9.86e-06	1.13e-05	4.67e-06	1.21e-05	4.07e-06	1.26e-05	4.81e-06	1.18e-05	0.336631	0.460926	-0.617399
K19338	4.96e-06	0	0	0	0	0	0	5.44e-06	0	4.68e-06	4.93e-06	5.67e-06	0	0	0	0	0	5.92e-06	0.336593	0.460926	-0.169101
K09974	0.000114065	6.28e-05	6.37e-05	6.39e-05	0.000109233	8.98e-05	7.67e-05	5.98e-05	8.03e-05	6.09e-05	5.42e-05	6.24e-05	8.88e-05	9.11e-05	7.33e-05	8.82e-05	6.25e-05	6.51e-05	0.336553	0.460926	1.07057
K08256	9.92e-06	0	0	0	0	0	1e-05	0	3.65e-06	4.68e-06	0	1.13e-05	0	6.07e-06	0	0	9.62e-06	1.18e-05	0.336327	0.460896	-0.194908
K06145	0	3.31e-06	0	0	0	0	0	0	0	0	0	5.67e-06	0	0	0	0	0	5.92e-06	0.33627	0.460896	-0.104136
K07159	4.96e-06	9.92e-06	9.1e-06	4.26e-06	4.55e-06	8.55e-06	1e-05	1.09e-05	1.46e-05	9.37e-06	4.93e-06	1.13e-05	4.67e-06	6.07e-06	4.07e-06	6.3e-06	4.81e-06	1.18e-05	0.336207	0.460896	0.600074
K18348	2.98e-05	1.65e-05	9.1e-06	1.7e-05	4.55e-06	2.57e-05	2e-05	3.81e-05	1.82e-05	1.87e-05	3.45e-05	3.97e-05	1.4e-05	4.25e-05	1.63e-05	3.15e-05	2.4e-05	5.92e-06	0.335723	0.460455	-0.488906
K13787	2.48e-05	3.31e-05	2.73e-05	3.41e-05	3.19e-05	1.28e-05	3.67e-05	4.35e-05	4.74e-05	3.75e-05	2.96e-05	4.54e-05	4.67e-06	3.64e-05	1.22e-05	3.15e-05	1.44e-05	2.96e-05	0.335674	0.460455	0.614159
K03652	0.000109105	0.000145458	9.56e-05	0.000127776	0.000109233	0.000124045	0.000140119	0.000130548	0.000131349	0.000149845	0.000152834	0.000187193	9.34e-05	0.000133578	0.000114051	0.00013236	9.14e-05	0.000165758	0.335603	0.460455	-1.26331
K16925	9.92e-06	1.98e-05	9.1e-06	8.52e-06	1.37e-05	0	1e-05	5.44e-06	7.3e-06	1.4e-05	9.86e-06	1.13e-05	9.34e-06	6.07e-06	8.15e-06	6.3e-06	1.92e-05	2.37e-05	0.334844	0.459636	-0.462188
K06942	0.00104146	0.00103804	0.00102398	0.00101795	0.00107412	0.00103085	0.00100085	0.000989991	0.00103985	0.00106296	0.00105998	0.00107778	0.00103705	0.00105041	0.000944995	0.00107149	0.00102417	0.00107151	0.334312	0.459035	-7.59679
K02683	4.96e-06	9.92e-06	4.55e-06	4.26e-06	4.55e-06	8.55e-06	6.67e-06	1.09e-05	1.09e-05	4.68e-06	9.86e-06	1.7e-05	4.67e-06	1.21e-05	4.07e-06	1.26e-05	4.81e-06	1.18e-05	0.334076	0.45884	-0.525001
K21379	9.92e-06	1.98e-05	9.1e-06	3.41e-05	2.28e-05	0	3.34e-05	3.26e-05	2.92e-05	2.34e-05	2.96e-05	2.84e-05	9.34e-06	4.25e-05	2.44e-05	3.78e-05	1.92e-05	2.37e-05	0.332727	0.457114	-0.531354
K01070	0	0	4.55e-06	0	0	0	0	0	0	0	0	0	0	0	0	0	0	0	0.332195	0.456512	0.0588235
K01212	0	0	0	4.26e-06	0	0	0	0	0	0	0	0	0	0	0	0	0	0	0.332195	0.456512	0.0588235
K02317	0	3.31e-06	0	0	0	0	0	0	0	0	0	0	0	0	0	0	0	0	0.332195	0.456512	0.0588235
K02479	0	0	0	0	0	4.28e-06	0	0	0	0	0	0	0	0	0	0	0	0	0.332195	0.456512	0.0588235
K02487	0	3.31e-06	0	0	0	0	0	0	0	0	0	0	0	0	0	0	0	0	0.332195	0.456512	0.0588235
K02509	0	0	0	0	9.1e-06	0	0	0	0	0	0	0	0	0	0	0	0	0	0.332195	0.456512	0.0588235
K02560	0	0	4.55e-06	0	0	0	0	0	0	0	0	0	0	0	0	0	0	0	0.332195	0.456512	0.0588235
K02682	0	0	0	4.26e-06	0	0	0	0	0	0	0	0	0	0	0	0	0	0	0.332195	0.456512	0.0588235
K03225	0	0	0	0	0	0	0	5.44e-06	0	0	0	0	0	0	0	0	0	0	0.332195	0.456512	0.0588235
K03291	0	0	4.55e-06	0	0	0	0	0	0	0	0	0	0	0	0	0	0	0	0.332195	0.456512	0.0588235
K03392	0	3.31e-06	0	0	0	0	0	0	0	0	0	0	0	0	0	0	0	0	0.332195	0.456512	0.0588235
K03566	0	0	4.55e-06	0	0	0	0	0	0	0	0	0	0	0	0	0	0	0	0.332195	0.456512	0.0588235
K03747	0	0	0	0	0	0	3.34e-06	0	0	0	0	0	0	0	0	0	0	0	0.332195	0.456512	0.0588235
K03782	0	0	0	4.26e-06	0	0	0	0	0	0	0	0	0	0	0	0	0	0	0.332195	0.456512	0.0588235
K04058	0	3.31e-06	0	0	0	0	0	0	0	0	0	0	0	0	0	0	0	0	0.332195	0.456512	0.0588235
K05714	0	0	0	4.26e-06	0	0	0	0	0	0	0	0	0	0	0	0	0	0	0.332195	0.456512	0.0588235
K05785	0	6.61e-06	0	0	0	0	0	0	0	0	0	0	0	0	0	0	0	0	0.332195	0.456512	0.0588235
K06175	0	0	0	0	0	0	3.34e-06	0	0	0	0	0	0	0	0	0	0	0	0.332195	0.456512	0.0588235
K06866	0	3.31e-06	0	0	0	0	0	0	0	0	0	0	0	0	0	0	0	0	0.332195	0.456512	0.0588235
K06977	0	0	0	4.26e-06	0	0	0	0	0	0	0	0	0	0	0	0	0	0	0.332195	0.456512	0.0588235
K06979	0	0	4.55e-06	0	0	0	0	0	0	0	0	0	0	0	0	0	0	0	0.332195	0.456512	0.0588235
K07062	0	0	0	0	0	0	0	0	3.65e-06	0	0	0	0	0	0	0	0	0	0.332195	0.456512	0.0588235
K07236	0	0	4.55e-06	0	0	0	0	0	0	0	0	0	0	0	0	0	0	0	0.332195	0.456512	0.0588235
K07275	0	3.31e-06	0	0	0	0	0	0	0	0	0	0	0	0	0	0	0	0	0.332195	0.456512	0.0588235
K07639	0	0	4.55e-06	0	0	0	0	0	0	0	0	0	0	0	0	0	0	0	0.332195	0.456512	0.0588235
K07648	0	0	4.55e-06	0	0	0	0	0	0	0	0	0	0	0	0	0	0	0	0.332195	0.456512	0.0588235
K07675	0	3.31e-06	0	0	0	0	0	0	0	0	0	0	0	0	0	0	0	0	0.332195	0.456512	0.0588235
K07687	0	0	0	0	0	0	0	0	3.65e-06	0	0	0	0	0	0	0	0	0	0.332195	0.456512	0.0588235
K08258	0	3.31e-06	0	0	0	0	0	0	0	0	0	0	0	0	0	0	0	0	0.332195	0.456512	0.0588235
K08297	0	3.31e-06	0	0	0	0	0	0	0	0	0	0	0	0	0	0	0	0	0.332195	0.456512	0.0588235
K09065	0	3.31e-06	0	0	0	0	0	0	0	0	0	0	0	0	0	0	0	0	0.332195	0.456512	0.0588235
K09667	0	0	0	4.26e-06	0	0	0	0	0	0	0	0	0	0	0	0	0	0	0.332195	0.456512	0.0588235
K09682	0	0	0	0	0	4.28e-06	0	0	0	0	0	0	0	0	0	0	0	0	0.332195	0.456512	0.0588235
K09771	0	0	0	0	0	0	3.34e-06	0	0	0	0	0	0	0	0	0	0	0	0.332195	0.456512	0.0588235
K10353	0	0	0	0	4.55e-06	0	0	0	0	0	0	0	0	0	0	0	0	0	0.332195	0.456512	0.0588235
K10711	0	0	0	4.26e-06	0	0	0	0	0	0	0	0	0	0	0	0	0	0	0.332195	0.456512	0.0588235
K10973	0	0	0	4.26e-06	0	0	0	0	0	0	0	0	0	0	0	0	0	0	0.332195	0.456512	0.0588235
K11060	0	0	4.55e-06	0	0	0	0	0	0	0	0	0	0	0	0	0	0	0	0.332195	0.456512	0.0588235
K11392	0	0	4.55e-06	0	0	0	0	0	0	0	0	0	0	0	0	0	0	0	0.332195	0.456512	0.0588235
K11748	0	0	0	0	0	0	3.34e-06	0	0	0	0	0	0	0	0	0	0	0	0.332195	0.456512	0.0588235
K12143	0	0	0	0	0	0	3.34e-06	0	0	0	0	0	0	0	0	0	0	0	0.332195	0.456512	0.0588235
K12203	0	3.31e-06	0	0	0	0	0	0	0	0	0	0	0	0	0	0	0	0	0.332195	0.456512	0.0588235
K12204	0	3.31e-06	0	0	0	0	0	0	0	0	0	0	0	0	0	0	0	0	0.332195	0.456512	0.0588235
K12205	0	3.31e-06	0	0	0	0	0	0	0	0	0	0	0	0	0	0	0	0	0.332195	0.456512	0.0588235
K12206	0	3.31e-06	0	0	0	0	0	0	0	0	0	0	0	0	0	0	0	0	0.332195	0.456512	0.0588235
K12213	0	3.31e-06	0	0	0	0	0	0	0	0	0	0	0	0	0	0	0	0	0.332195	0.456512	0.0588235
K12214	0	3.31e-06	0	0	0	0	0	0	0	0	0	0	0	0	0	0	0	0	0.332195	0.456512	0.0588235
K12218	0	3.31e-06	0	0	0	0	0	0	0	0	0	0	0	0	0	0	0	0	0.332195	0.456512	0.0588235
K12255	0	3.31e-06	0	0	0	0	0	0	0	0	0	0	0	0	0	0	0	0	0.332195	0.456512	0.0588235
K12543	0	3.31e-06	0	0	0	0	0	0	0	0	0	0	0	0	0	0	0	0	0.332195	0.456512	0.0588235
K12553	0	0	0	4.26e-06	0	0	0	0	0	0	0	0	0	0	0	0	0	0	0.332195	0.456512	0.0588235
K12943	0	0	0	0	0	0	0	5.44e-06	0	0	0	0	0	0	0	0	0	0	0.332195	0.456512	0.0588235
K12985	0	0	0	0	0	0	0	5.44e-06	0	0	0	0	0	0	0	0	0	0	0.332195	0.456512	0.0588235
K12991	0	0	4.55e-06	0	0	0	0	0	0	0	0	0	0	0	0	0	0	0	0.332195	0.456512	0.0588235
K12999	0	0	0	0	0	0	0	0	3.65e-06	0	0	0	0	0	0	0	0	0	0.332195	0.456512	0.0588235
K13483	0	0	0	0	0	0	3.34e-06	0	0	0	0	0	0	0	0	0	0	0	0.332195	0.456512	0.0588235
K13533	0	0	0	0	9.1e-06	0	0	0	0	0	0	0	0	0	0	0	0	0	0.332195	0.456512	0.0588235
K13636	0	0	0	0	0	0	0	5.44e-06	0	0	0	0	0	0	0	0	0	0	0.332195	0.456512	0.0588235
K13639	0	0	0	0	0	0	0	5.44e-06	0	0	0	0	0	0	0	0	0	0	0.332195	0.456512	0.0588235
K14052	0	0	0	0	0	0	6.67e-06	0	0	0	0	0	0	0	0	0	0	0	0.332195	0.456512	0.0588235
K14414	0	3.31e-06	0	0	0	0	0	0	0	0	0	0	0	0	0	0	0	0	0.332195	0.456512	0.0588235
K14459	0	0	4.55e-06	0	0	0	0	0	0	0	0	0	0	0	0	0	0	0	0.332195	0.456512	0.0588235
K14651	0	0	0	0	0	0	0	0	3.65e-06	0	0	0	0	0	0	0	0	0	0.332195	0.456512	0.0588235
K15125	0	0	0	0	0	4.28e-06	0	0	0	0	0	0	0	0	0	0	0	0	0.332195	0.456512	0.0588235
K15545	0	0	0	0	4.55e-06	0	0	0	0	0	0	0	0	0	0	0	0	0	0.332195	0.456512	0.0588235
K15773	0	3.31e-06	0	0	0	0	0	0	0	0	0	0	0	0	0	0	0	0	0.332195	0.456512	0.0588235
K16122	0	0	4.55e-06	0	0	0	0	0	0	0	0	0	0	0	0	0	0	0	0.332195	0.456512	0.0588235
K16201	0	0	0	0	0	0	0	5.44e-06	0	0	0	0	0	0	0	0	0	0	0.332195	0.456512	0.0588235
K16291	0	3.31e-06	0	0	0	0	0	0	0	0	0	0	0	0	0	0	0	0	0.332195	0.456512	0.0588235
K16695	0	0	4.55e-06	0	0	0	0	0	0	0	0	0	0	0	0	0	0	0	0.332195	0.456512	0.0588235
K18123	0	0	0	0	4.55e-06	0	0	0	0	0	0	0	0	0	0	0	0	0	0.332195	0.456512	0.0588235
K18221	0	0	0	0	0	0	0	5.44e-06	0	0	0	0	0	0	0	0	0	0	0.332195	0.456512	0.0588235
K18830	0	0	0	0	0	0	0	0	3.65e-06	0	0	0	0	0	0	0	0	0	0.332195	0.456512	0.0588235
K18837	0	3.31e-06	0	0	0	0	0	0	0	0	0	0	0	0	0	0	0	0	0.332195	0.456512	0.0588235
K18838	0	3.31e-06	0	0	0	0	0	0	0	0	0	0	0	0	0	0	0	0	0.332195	0.456512	0.0588235
K18901	0	0	9.1e-06	0	0	0	0	0	0	0	0	0	0	0	0	0	0	0	0.332195	0.456512	0.0588235
K18986	0	0	0	4.26e-06	0	0	0	0	0	0	0	0	0	0	0	0	0	0	0.332195	0.456512	0.0588235
K18997	0	3.31e-06	0	0	0	0	0	0	0	0	0	0	0	0	0	0	0	0	0.332195	0.456512	0.0588235
K19228	0	0	0	0	0	0	0	5.44e-06	0	0	0	0	0	0	0	0	0	0	0.332195	0.456512	0.0588235
K19778	0	0	0	0	0	0	0	5.44e-06	0	0	0	0	0	0	0	0	0	0	0.332195	0.456512	0.0588235
K20112	0	3.31e-06	0	0	0	0	0	0	0	0	0	0	0	0	0	0	0	0	0.332195	0.456512	0.0588235
K20342	0	0	4.55e-06	0	0	0	0	0	0	0	0	0	0	0	0	0	0	0	0.332195	0.456512	0.0588235
K21298	0	3.31e-06	0	0	0	0	0	0	0	0	0	0	0	0	0	0	0	0	0.332195	0.456512	0.0588235
K21493	0	0	0	4.26e-06	0	0	0	0	0	0	0	0	0	0	0	0	0	0	0.332195	0.456512	0.0588235
K21908	0	0	0	0	0	0	3.34e-06	0	0	0	0	0	0	0	0	0	0	0	0.332195	0.456512	0.0588235
K22104	0	0	0	0	0	4.28e-06	0	0	0	0	0	0	0	0	0	0	0	0	0.332195	0.456512	0.0588235
K22252	0	0	4.55e-06	0	0	0	0	0	0	0	0	0	0	0	0	0	0	0	0.332195	0.456512	0.0588235
K22457	0	0	0	0	4.55e-06	0	0	0	0	0	0	0	0	0	0	0	0	0	0.332195	0.456512	0.0588235
K00090	0	0	0	0	0	0	0	0	0	0	0	5.67e-06	0	0	0	0	0	0	0.332195	0.456512	-0.0588235
K00158	0	0	0	0	0	0	0	0	0	0	0	0	0	0	0	0	0	5.92e-06	0.332195	0.456512	-0.0588235
K01261	0	0	0	0	0	0	0	0	0	0	0	0	4.67e-06	0	0	0	0	0	0.332195	0.456512	-0.0588235
K01467	0	0	0	0	0	0	0	0	0	0	0	0	0	0	0	0	4.81e-06	0	0.332195	0.456512	-0.0588235
K01782	0	0	0	0	0	0	0	0	0	4.68e-06	0	0	0	0	0	0	0	0	0.332195	0.456512	-0.0588235
K02248	0	0	0	0	0	0	0	0	0	0	0	0	0	6.07e-06	0	0	0	0	0.332195	0.456512	-0.0588235
K02364	0	0	0	0	0	0	0	0	0	0	0	0	0	0	0	0	4.81e-06	0	0.332195	0.456512	-0.0588235
K03485	0	0	0	0	0	0	0	0	0	0	0	0	0	6.07e-06	0	0	0	0	0.332195	0.456512	-0.0588235
K03756	0	0	0	0	0	0	0	0	0	0	0	0	4.67e-06	0	0	0	0	0	0.332195	0.456512	-0.0588235
K04086	0	0	0	0	0	0	0	0	0	0	0	0	0	0	0	0	0	5.92e-06	0.332195	0.456512	-0.0588235
K05351	0	0	0	0	0	0	0	0	0	0	0	0	0	0	0	0	0	5.92e-06	0.332195	0.456512	-0.0588235
K05577	0	0	0	0	0	0	0	0	0	0	0	0	0	6.07e-06	0	0	0	0	0.332195	0.456512	-0.0588235
K05586	0	0	0	0	0	0	0	0	0	0	0	0	0	0	0	0	0	5.92e-06	0.332195	0.456512	-0.0588235
K06222	0	0	0	0	0	0	0	0	0	0	0	0	0	0	4.07e-06	0	0	0	0.332195	0.456512	-0.0588235
K07063	0	0	0	0	0	0	0	0	0	0	0	0	0	6.07e-06	0	0	0	0	0.332195	0.456512	-0.0588235
K07180	0	0	0	0	0	0	0	0	0	0	0	0	0	6.07e-06	0	0	0	0	0.332195	0.456512	-0.0588235
K07592	0	0	0	0	0	0	0	0	0	0	0	0	0	0	0	0	4.81e-06	0	0.332195	0.456512	-0.0588235
K07778	0	0	0	0	0	0	0	0	0	4.68e-06	0	0	0	0	0	0	0	0	0.332195	0.456512	-0.0588235
K08166	0	0	0	0	0	0	0	0	0	0	0	0	0	0	0	0	4.81e-06	0	0.332195	0.456512	-0.0588235
K08306	0	0	0	0	0	0	0	0	0	4.68e-06	0	0	0	0	0	0	0	0	0.332195	0.456512	-0.0588235
K08357	0	0	0	0	0	0	0	0	0	0	0	0	0	0	0	0	4.81e-06	0	0.332195	0.456512	-0.0588235
K08693	0	0	0	0	0	0	0	0	0	0	0	0	0	0	0	6.3e-06	0	0	0.332195	0.456512	-0.0588235
K10126	0	0	0	0	0	0	0	0	0	0	0	0	4.67e-06	0	0	0	0	0	0.332195	0.456512	-0.0588235
K10242	0	0	0	0	0	0	0	0	0	0	9.86e-06	0	0	0	0	0	0	0	0.332195	0.456512	-0.0588235
K11604	0	0	0	0	0	0	0	0	0	0	0	0	4.67e-06	0	0	0	0	0	0.332195	0.456512	-0.0588235
K11897	0	0	0	0	0	0	0	0	0	0	0	0	0	0	0	0	0	5.92e-06	0.332195	0.456512	-0.0588235
K11933	0	0	0	0	0	0	0	0	0	0	0	0	0	6.07e-06	0	0	0	0	0.332195	0.456512	-0.0588235
K11935	0	0	0	0	0	0	0	0	0	0	0	0	4.67e-06	0	0	0	0	0	0.332195	0.456512	-0.0588235
K12138	0	0	0	0	0	0	0	0	0	0	4.93e-06	0	0	0	0	0	0	0	0.332195	0.456512	-0.0588235
K12295	0	0	0	0	0	0	0	0	0	0	0	5.67e-06	0	0	0	0	0	0	0.332195	0.456512	-0.0588235
K12567	0	0	0	0	0	0	0	0	0	0	0	0	0	0	4.07e-06	0	0	0	0.332195	0.456512	-0.0588235
K13256	0	0	0	0	0	0	0	0	0	0	0	0	0	0	0	0	0	5.92e-06	0.332195	0.456512	-0.0588235
K13274	0	0	0	0	0	0	0	0	0	0	0	0	0	0	4.07e-06	0	0	0	0.332195	0.456512	-0.0588235
K13638	0	0	0	0	0	0	0	0	0	0	0	0	0	0	8.15e-06	0	0	0	0.332195	0.456512	-0.0588235
K13796	0	0	0	0	0	0	0	0	0	0	0	0	0	0	0	0	0	5.92e-06	0.332195	0.456512	-0.0588235
K13923	0	0	0	0	0	0	0	0	0	0	0	0	0	0	0	6.3e-06	0	0	0.332195	0.456512	-0.0588235
K15721	0	0	0	0	0	0	0	0	0	4.68e-06	0	0	0	0	0	0	0	0	0.332195	0.456512	-0.0588235
K15834	0	0	0	0	0	0	0	0	0	0	4.93e-06	0	0	0	0	0	0	0	0.332195	0.456512	-0.0588235
K15835	0	0	0	0	0	0	0	0	0	0	4.93e-06	0	0	0	0	0	0	0	0.332195	0.456512	-0.0588235
K16188	0	0	0	0	0	0	0	0	0	0	0	5.67e-06	0	0	0	0	0	0	0.332195	0.456512	-0.0588235
K16321	0	0	0	0	0	0	0	0	0	0	0	0	0	0	0	0	0	5.92e-06	0.332195	0.456512	-0.0588235
K16916	0	0	0	0	0	0	0	0	0	0	0	0	0	0	4.07e-06	0	0	0	0.332195	0.456512	-0.0588235
K17331	0	0	0	0	0	0	0	0	0	0	4.93e-06	0	0	0	0	0	0	0	0.332195	0.456512	-0.0588235
K18140	0	0	0	0	0	0	0	0	0	0	0	0	4.67e-06	0	0	0	0	0	0.332195	0.456512	-0.0588235
K18141	0	0	0	0	0	0	0	0	0	0	0	0	0	0	0	0	0	5.92e-06	0.332195	0.456512	-0.0588235
K18148	0	0	0	0	0	0	0	0	0	0	0	0	0	0	0	6.3e-06	0	0	0.332195	0.456512	-0.0588235
K18673	0	0	0	0	0	0	0	0	0	0	0	0	0	0	4.07e-06	0	0	0	0.332195	0.456512	-0.0588235
K19064	0	0	0	0	0	0	0	0	0	0	0	0	0	0	0	0	0	5.92e-06	0.332195	0.456512	-0.0588235
K19505	0	0	0	0	0	0	0	0	0	0	0	0	0	0	4.07e-06	0	0	0	0.332195	0.456512	-0.0588235
K19577	0	0	0	0	0	0	0	0	0	0	0	0	0	6.07e-06	0	0	0	0	0.332195	0.456512	-0.0588235
K19974	0	0	0	0	0	0	0	0	0	4.68e-06	0	0	0	0	0	0	0	0	0.332195	0.456512	-0.0588235
K20374	0	0	0	0	0	0	0	0	0	0	0	0	0	0	0	0	0	5.92e-06	0.332195	0.456512	-0.0588235
K20971	0	0	0	0	0	0	0	0	0	0	0	5.67e-06	0	0	0	0	0	0	0.332195	0.456512	-0.0588235
K21833	0	0	0	0	0	0	0	0	0	4.68e-06	0	0	0	0	0	0	0	0	0.332195	0.456512	-0.0588235
K22409	0	0	0	0	0	0	0	0	0	0	4.93e-06	0	0	0	0	0	0	0	0.332195	0.456512	-0.0588235
K01134	4.96e-06	0	0	0	0	0	0	0	0	0	0	0	0	0	0	0	0	0	0.332195	0.456512	0.0588235
K01699	9.92e-06	0	0	0	0	0	0	0	0	0	0	0	0	0	0	0	0	0	0.332195	0.456512	0.0588235
K03829	4.96e-06	0	0	0	0	0	0	0	0	0	0	0	0	0	0	0	0	0	0.332195	0.456512	0.0588235
K04748	4.96e-06	0	0	0	0	0	0	0	0	0	0	0	0	0	0	0	0	0	0.332195	0.456512	0.0588235
K05579	9.92e-06	0	0	0	0	0	0	0	0	0	0	0	0	0	0	0	0	0	0.332195	0.456512	0.0588235
K07274	4.96e-06	0	0	0	0	0	0	0	0	0	0	0	0	0	0	0	0	0	0.332195	0.456512	0.0588235
K07757	4.96e-06	0	0	0	0	0	0	0	0	0	0	0	0	0	0	0	0	0	0.332195	0.456512	0.0588235
K15736	4.96e-06	0	0	0	0	0	0	0	0	0	0	0	0	0	0	0	0	0	0.332195	0.456512	0.0588235
K18144	4.96e-06	0	0	0	0	0	0	0	0	0	0	0	0	0	0	0	0	0	0.332195	0.456512	0.0588235
K18530	4.96e-06	0	0	0	0	0	0	0	0	0	0	0	0	0	0	0	0	0	0.332195	0.456512	0.0588235
K07463	9.92e-06	2.31e-05	1.82e-05	8.52e-06	9.1e-06	1.28e-05	2e-05	2.18e-05	2.19e-05	9.37e-06	1.97e-05	3.4e-05	9.34e-06	2.43e-05	8.15e-06	3.15e-05	9.62e-06	4.14e-05	0.33112	0.456512	-0.467563
K02869	4.96e-06	1.32e-05	4.55e-06	4.26e-06	4.55e-06	8.55e-06	1.33e-05	1.09e-05	1.09e-05	4.68e-06	4.93e-06	1.7e-05	4.67e-06	6.07e-06	4.07e-06	6.3e-06	4.81e-06	5.92e-06	0.330653	0.456512	0.473012
K11901	4.96e-06	3.31e-06	1.37e-05	0	0	4.28e-06	6.67e-06	0	3.65e-06	0	0	0	4.67e-06	0	4.07e-06	6.3e-06	0	5.92e-06	0.330544	0.456512	0.218232
K01548	1.49e-05	1.98e-05	3.64e-05	1.7e-05	9.1e-06	1.28e-05	1e-05	3.26e-05	0	4.68e-06	0	5.67e-06	1.4e-05	1.82e-05	2.44e-05	3.15e-05	0	5.92e-06	0.329448	0.456512	0.316884
K17489	4.96e-06	9.92e-06	4.55e-06	4.26e-06	9.1e-06	0	0	1.63e-05	7.3e-06	1.4e-05	0	0	4.67e-06	6.07e-06	0	0	9.62e-06	0	0.329436	0.456512	0.245013
K02982	0.00113073	0.00115375	0.00109224	0.00112869	0.00107868	0.0011549	0.00110427	0.00101175	0.00112742	0.00114257	0.00109942	0.00110614	0.00113048	0.00102612	0.000989801	0.00102106	0.00108187	0.00116031	0.329365	0.456512	5.22812
K08975	4.96e-06	6.61e-06	4.55e-06	4.26e-06	4.55e-06	4.28e-06	6.67e-06	1.09e-05	7.3e-06	4.68e-06	4.93e-06	5.67e-06	4.67e-06	6.07e-06	4.07e-06	6.3e-06	4.81e-06	5.92e-06	0.329354	0.456512	0.865108
K10122	1.49e-05	6.61e-06	0	2.98e-05	3.64e-05	2.57e-05	2.34e-05	2.72e-05	2.19e-05	1.4e-05	0	2.84e-05	1.87e-05	1.21e-05	2.85e-05	1.89e-05	1.44e-05	5.92e-06	0.32835	0.456512	0.433963
K18009	1.49e-05	3.31e-06	1.37e-05	4.26e-06	4.55e-06	0	3e-05	1.09e-05	1.46e-05	0	1.97e-05	5.67e-06	9.34e-06	6.07e-06	4.07e-06	6.3e-06	0	1.18e-05	0.326984	0.456512	0.287364
K06965	4.96e-06	9.92e-06	4.55e-06	4.26e-06	4.55e-06	4.28e-06	1.33e-05	1.09e-05	1.09e-05	4.68e-06	9.86e-06	1.7e-05	4.67e-06	1.21e-05	4.07e-06	1.26e-05	4.81e-06	1.78e-05	0.32687	0.456512	-0.467051
K09681	1.98e-05	2.31e-05	3.19e-05	8.52e-06	1.82e-05	2.14e-05	1.33e-05	0	1.82e-05	4.21e-05	4.93e-05	5.11e-05	1.4e-05	0	1.22e-05	6.3e-06	1.44e-05	2.96e-05	0.326407	0.456512	-0.348119
K00943	0.000947233	0.00106449	0.000973914	0.000911468	0.000937582	0.000915363	0.000940797	0.000745213	0.0010362	0.00103487	0.000971238	0.00100971	0.000962311	0.00108684	0.000765772	0.00108409	0.000928001	0.00103599	0.326154	0.456512	-2.57202
K03462	3.47e-05	5.62e-05	5.46e-05	5.54e-05	7.28e-05	6.84e-05	7.01e-05	1.09e-05	5.47e-05	4.68e-05	3.94e-05	5.11e-05	5.14e-05	4.25e-05	4.48e-05	4.41e-05	4.33e-05	5.33e-05	0.325623	0.456512	0.884163
K14977	0	3.31e-06	0	4.26e-06	4.55e-06	4.28e-06	3.34e-06	0	1.09e-05	0	0	0	4.67e-06	6.07e-06	0	6.3e-06	0	0	0.325612	0.456512	0.211743
K18882	4.96e-06	9.92e-06	4.55e-06	4.26e-06	4.55e-06	8.55e-06	1e-05	1.09e-05	7.3e-06	4.68e-06	9.86e-06	1.13e-05	4.67e-06	1.82e-05	4.07e-06	1.26e-05	4.81e-06	1.18e-05	0.324969	0.456512	-0.523529
K19647	0	6.61e-06	4.55e-06	8.52e-06	4.55e-06	8.55e-06	1e-05	1.09e-05	1.09e-05	4.68e-06	4.93e-06	0	9.34e-06	6.07e-06	1.22e-05	6.3e-06	4.81e-06	0	0.324796	0.456512	0.421027
K09607	1.98e-05	1.98e-05	1.37e-05	2.13e-05	2.28e-05	1.71e-05	1.67e-05	3.81e-05	2.19e-05	1.4e-05	2.47e-05	2.27e-05	2.34e-05	4.25e-05	2.44e-05	3.78e-05	1.92e-05	1.78e-05	0.324196	0.456512	-0.718729
K19115	1.49e-05	3.31e-06	4.55e-06	1.28e-05	1.82e-05	1.71e-05	6.67e-06	0	3.65e-06	4.68e-06	0	0	1.4e-05	1.21e-05	8.15e-06	6.3e-06	9.62e-06	0	0.324131	0.456512	0.313886
K07226	4.96e-06	0	0	4.26e-06	4.55e-06	4.28e-06	0	0	3.65e-06	9.37e-06	0	0	4.67e-06	6.07e-06	0	1.26e-05	4.81e-06	0	0.323863	0.456512	-0.227675
K03638	0	3.31e-06	0	0	0	0	6.67e-06	0	0	0	4.93e-06	5.67e-06	4.67e-06	0	0	0	0	5.92e-06	0.323848	0.456512	-0.169126
K02913	0.000624876	0.000545467	0.000582528	0.000574992	0.000587127	0.000534675	0.000603845	0.000505875	0.000561884	0.000590015	0.00069515	0.000595613	0.000635312	0.000643602	0.000431765	0.000693315	0.000490446	0.000639352	0.322942	0.456512	-2.19286
K19124	2.48e-05	3.31e-05	1.82e-05	2.98e-05	4.55e-05	3.42e-05	2.34e-05	2.72e-05	2.92e-05	3.28e-05	3.94e-05	3.97e-05	4.67e-06	3.64e-05	2.44e-05	4.41e-05	4.33e-05	4.74e-05	0.322869	0.456512	-0.754084
K07152	4.96e-06	0	0	4.26e-06	4.55e-06	0	3.34e-06	0	3.65e-06	4.68e-06	4.93e-06	0	4.67e-06	6.07e-06	0	6.3e-06	4.81e-06	0	0.322769	0.456512	-0.298133
K08851	4.96e-06	9.92e-06	1.37e-05	1.28e-05	4.55e-06	8.55e-06	6.67e-06	2.18e-05	7.3e-06	4.68e-06	1.48e-05	2.27e-05	4.67e-06	2.43e-05	4.07e-06	2.52e-05	4.81e-06	1.78e-05	0.322035	0.456512	-0.398634
K03743	0.000317397	0.000317363	0.000332223	0.000332217	0.000355007	0.000350747	0.000313599	0.000320931	0.000353914	0.000304373	0.00035497	0.000357368	0.00036437	0.000327873	0.000346227	0.000302538	0.000341389	0.000402555	0.321318	0.456512	-3.45915
K07346	0	0	0	0	0	0	3.34e-06	5.44e-06	1.09e-05	0	0	0	0	0	0	6.3e-06	0	0	0.321138	0.456512	0.119392
K13531	4.96e-06	3.31e-06	0	0	0	0	3.34e-06	0	0	0	0	5.67e-06	4.67e-06	0	4.07e-06	0	9.62e-06	0	0.320851	0.456512	-0.176647
K07122	0	0	4.55e-06	0	0	0	0	5.44e-06	0	0	0	0	4.67e-06	6.07e-06	4.07e-06	6.3e-06	0	0	0.320572	0.456512	-0.172358
K09722	4.96e-06	9.92e-06	4.55e-06	4.26e-06	4.55e-06	8.55e-06	1e-05	1.09e-05	7.3e-06	4.68e-06	9.86e-06	1.7e-05	4.67e-06	1.21e-05	4.07e-06	1.26e-05	4.81e-06	1.18e-05	0.320316	0.456512	-0.544737
K06925	0.0011952	0.0012397	0.00124697	0.00123943	0.00124252	0.001249	0.00117766	0.00108246	0.00116025	0.00127368	0.00126705	0.00122526	0.00121924	0.00123256	0.00119754	0.00124797	0.00114437	0.00123726	0.317688	0.456512	-6.44201
K01364	9.92e-06	0	4.55e-06	0	0	8.55e-06	0	0	0	4.68e-06	1.48e-05	5.67e-06	4.67e-06	6.07e-06	0	6.3e-06	0	0	0.317631	0.456512	-0.212118
K18237	9.92e-06	9.92e-06	4.55e-06	8.52e-06	4.55e-06	8.55e-06	6.67e-06	1.63e-05	1.09e-05	4.68e-06	1.97e-05	1.13e-05	4.67e-06	3.04e-05	4.07e-06	1.26e-05	4.81e-06	1.78e-05	0.317114	0.456512	-0.393592
K01586	0.000704225	0.000800019	0.000741813	0.000787952	0.000732771	0.000778486	0.000817359	0.000886641	0.00080634	0.000763273	0.00070008	0.000714735	0.000770783	0.000801467	0.000818724	0.000750041	0.000812602	0.000704471	0.316917	0.456512	3.95904
K16554	4.96e-06	1.98e-05	1.82e-05	1.28e-05	1.82e-05	4.28e-06	1.67e-05	1.09e-05	1.82e-05	1.87e-05	1.48e-05	1.7e-05	9.34e-06	2.43e-05	8.15e-06	1.89e-05	1.92e-05	1.78e-05	0.316669	0.456512	-0.705629
K15667	4.96e-06	0	4.55e-06	4.26e-06	0	4.28e-06	3.34e-06	0	0	9.37e-06	0	0	0	0	0	0	0	0	0.316533	0.456512	0.160279
K07173	0.000674469	0.000647949	0.000618936	0.000643139	0.000678154	0.000680106	0.000680576	0.000658181	0.000685936	0.000660255	0.000655709	0.000646665	0.000738083	0.000649674	0.000769845	0.000623984	0.00078856	0.000639352	0.316337	0.456512	-3.71757
K00333	5.95e-05	5.62e-05	5.46e-05	4.26e-05	4.1e-05	6.42e-05	7.67e-05	3.26e-05	5.11e-05	2.81e-05	3.94e-05	3.4e-05	4.67e-05	7.89e-05	3.26e-05	8.19e-05	1.44e-05	4.14e-05	0.316254	0.456512	0.677194
K02457	0	0	4.55e-06	0	0	0	0	5.44e-06	0	4.68e-06	0	5.67e-06	0	0	0	0	4.81e-06	5.92e-06	0.31609	0.456512	-0.175782
K22224	8.93e-05	6.61e-05	5.46e-05	5.54e-05	7.28e-05	3.85e-05	7.34e-05	6.53e-05	7.66e-05	3.28e-05	6.9e-05	3.97e-05	3.27e-05	9.71e-05	1.22e-05	9.45e-05	1.92e-05	8.29e-05	0.315715	0.456512	0.602034
K03574	0.00140349	0.00137193	0.00140626	0.00141831	0.00129714	0.00145859	0.00146124	0.00126741	0.0014339	0.00145631	0.0014396	0.00141245	0.00141077	0.00145114	0.00137676	0.00140554	0.00137036	0.0014267	0.315043	0.456512	-6.88111
K06909	0.00014878	0.000195046	0.00018204	0.000166109	0.000177503	0.000192483	0.000220186	0.000195822	0.000189727	0.000201354	0.000207066	0.000215555	0.000182185	0.000255012	0.000146637	0.000258417	0.000125016	0.000230877	0.314861	0.456512	-1.42491
K00184	0	1.98e-05	1.37e-05	8.52e-06	4.55e-06	1.28e-05	1.33e-05	2.18e-05	7.3e-06	2.81e-05	1.97e-05	5.67e-06	9.34e-06	1.21e-05	8.15e-06	1.89e-05	1.92e-05	1.18e-05	0.314605	0.456512	-0.475002
K03688	2.48e-05	4.63e-05	3.64e-05	2.56e-05	4.55e-05	2.57e-05	3.67e-05	1.63e-05	2.55e-05	3.28e-05	0	2.84e-05	1.4e-05	3.04e-05	2.04e-05	1.89e-05	2.88e-05	5.33e-05	0.314565	0.456512	0.576737
K00275	4.96e-06	6.61e-06	3.64e-05	4.26e-06	0	1.28e-05	1e-05	1.63e-05	3.65e-06	4.68e-06	4.93e-06	5.67e-06	0	1.21e-05	8.15e-06	1.26e-05	4.81e-06	5.92e-06	0.314431	0.456512	0.269009
K03044	9.92e-06	3.31e-06	0	0	4.55e-06	0	6.67e-06	5.44e-06	3.65e-06	4.68e-06	0	2.27e-05	0	0	0	1.89e-05	4.81e-06	1.18e-05	0.314414	0.456512	-0.207529
K03299	5.46e-05	5.95e-05	4.55e-05	5.11e-05	5.46e-05	6.42e-05	6.67e-05	8.7e-05	4.74e-05	5.15e-05	3.94e-05	5.11e-05	6.07e-05	4.86e-05	6.11e-05	5.67e-05	6.25e-05	5.33e-05	0.314387	0.456512	1.40373
K13481	4.96e-06	0	4.55e-06	4.26e-06	4.55e-06	0	0	0	0	4.68e-06	0	1.13e-05	0	6.07e-06	0	0	4.81e-06	5.92e-06	0.314147	0.456512	-0.223456
K07799	1.98e-05	1.32e-05	1.37e-05	8.52e-06	4.55e-06	4.28e-06	6.67e-06	2.18e-05	1.46e-05	0	4.93e-06	0	1.87e-05	1.82e-05	1.22e-05	1.26e-05	9.62e-06	0	0.313715	0.456512	0.376253
K17675	1.49e-05	1.98e-05	9.1e-06	3.41e-05	4.1e-05	2.57e-05	2.67e-05	1.63e-05	2.92e-05	3.28e-05	2.47e-05	1.7e-05	1.87e-05	1.21e-05	2.44e-05	1.26e-05	1.92e-05	1.78e-05	0.312335	0.454889	0.672756
K21948	0	3.31e-06	4.55e-06	8.52e-06	0	8.55e-06	1e-05	0	1.09e-05	0	4.93e-06	0	9.34e-06	0	8.15e-06	0	4.81e-06	0	0.311466	0.453757	0.25105
K00939	0.00124975	0.00124631	0.00125608	0.00132887	0.00122432	0.00125328	0.00122103	0.00115318	0.00128431	0.00130646	0.00133114	0.00123661	0.00128931	0.00125077	0.0011568	0.00125427	0.00126939	0.00136158	0.311202	0.453509	-6.06435
K16190	0	1.32e-05	4.55e-06	4.26e-06	4.55e-06	4.28e-06	1.33e-05	5.44e-06	1.46e-05	4.68e-06	4.93e-06	5.67e-06	0	1.21e-05	0	6.3e-06	4.81e-06	5.92e-06	0.311137	0.453509	0.351518
K06189	1.49e-05	6.61e-06	9.1e-06	4.26e-06	4.55e-06	8.55e-06	6.67e-06	1.63e-05	3.65e-06	4.68e-06	4.93e-06	0	9.34e-06	6.07e-06	8.15e-06	1.26e-05	4.81e-06	5.92e-06	0.310113	0.452191	0.465664
K03969	6.94e-05	5.62e-05	5.92e-05	5.54e-05	0.000109233	0.000141154	8.01e-05	7.07e-05	9.12e-05	3.28e-05	6.41e-05	7.94e-05	6.54e-05	7.89e-05	8.96e-05	9.45e-05	4.81e-05	7.1e-05	0.310099	0.452191	0.80126
K20989	0	0	0	0	4.55e-06	0	3.34e-06	0	3.65e-06	0	0	0	0	0	4.07e-06	0	0	0	0.309937	0.452191	0.134379
K09716	4.96e-06	6.61e-06	4.55e-06	4.26e-06	4.55e-06	8.55e-06	1e-05	1.09e-05	7.3e-06	4.68e-06	9.86e-06	1.13e-05	4.67e-06	1.21e-05	4.07e-06	1.26e-05	4.81e-06	1.18e-05	0.309815	0.45216	-0.622858
K02455	1.98e-05	2.98e-05	3.19e-05	2.13e-05	3.64e-05	2.57e-05	2.67e-05	2.72e-05	4.01e-05	2.34e-05	1.48e-05	5.67e-06	1.87e-05	4.86e-05	8.15e-06	3.78e-05	2.4e-05	2.96e-05	0.309631	0.452026	0.627565
K16306	9.92e-06	1.65e-05	1.37e-05	8.52e-06	9.1e-06	1.28e-05	1.33e-05	2.18e-05	1.46e-05	9.37e-06	1.97e-05	2.27e-05	9.34e-06	2.43e-05	8.15e-06	2.52e-05	9.62e-06	1.78e-05	0.30907	0.451341	-0.662751
K02529	0.00155227	0.0017488	0.00192052	0.0016909	0.00140182	0.00135166	0.00205507	0.0015829	0.00198848	0.0017279	0.00165653	0.00212152	0.00159762	0.00190652	0.00181667	0.00195389	0.00180792	0.00165758	0.308798	0.45108	-2.13624
K16149	0.000133902	6.28e-05	0.000109224	6.81e-05	0.000113784	0.000124045	9.34e-05	4.9e-05	0.000102161	8.9e-05	9.86e-05	9.08e-05	7.47e-05	9.71e-05	4.48e-05	8.82e-05	5.29e-05	0.000106559	0.308465	0.450727	0.909273
K06436	0.000123983	0.000142152	0.000122877	0.000114998	0.000150195	0.000132599	7.01e-05	5.44e-05	0.000102161	0.000135797	0.000128184	0.000170175	0.000135471	0.000163936	7.33e-05	0.000144966	5.77e-05	0.000165758	0.308115	0.45035	-0.876133
K06990	9.42e-05	5.95e-05	5.01e-05	2.98e-05	2.73e-05	5.13e-05	6.67e-05	2.18e-05	6.57e-05	2.81e-05	2.96e-05	4.54e-05	2.34e-05	9.11e-05	8.15e-06	5.67e-05	1.44e-05	5.92e-05	0.307481	0.449558	0.484003
K12529	0	6.61e-06	4.55e-06	0	4.55e-06	0	3.34e-06	0	1.09e-05	4.68e-06	0	0	0	0	0	0	4.81e-06	5.92e-06	0.307452	0.449558	0.202614
K01706	2.48e-05	3.64e-05	1.82e-05	4.26e-06	3.19e-05	1.71e-05	2e-05	4.9e-05	2.19e-05	9.37e-06	1.97e-05	3.4e-05	3.27e-05	4.25e-05	3.67e-05	4.41e-05	1.92e-05	4.14e-05	0.30743	0.449558	-0.582539
K01810	0.00100179	0.000988453	0.000978465	0.00100517	0.000992199	0.000979524	0.000930788	0.000924717	0.000868366	0.00101145	0.000951517	0.000981343	0.000980997	0.000935045	0.000985727	0.000951733	0.00108187	0.000988628	0.307284	0.449558	-5.73217
K06156	9.92e-06	6.61e-06	1.37e-05	1.28e-05	9.1e-06	8.55e-06	6.67e-06	1.63e-05	0	4.68e-06	0	5.67e-06	1.4e-05	6.07e-06	2.04e-05	6.3e-06	0	0	0.307246	0.449558	0.344898
K18231	4.96e-06	0	4.55e-06	1.28e-05	4.55e-06	4.28e-06	3.34e-06	5.44e-06	7.3e-06	0	4.93e-06	5.67e-06	0	1.82e-05	4.07e-06	2.52e-05	0	2.37e-05	0.3069	0.449379	-0.243012
K17073	0.00014878	0.000128929	0.000218448	0.000225737	0.000186606	0.000141154	0.000180153	0.000201262	0.000175133	0.000191989	0.000202136	0.000209883	0.000177514	0.00017608	0.00017515	0.00017648	0.00019714	0.000219037	0.306662	0.449165	-1.8209
K18931	1.49e-05	1.32e-05	9.1e-06	8.52e-06	9.1e-06	1.28e-05	1e-05	1.63e-05	1.09e-05	9.37e-06	1.97e-05	1.13e-05	4.67e-06	2.43e-05	8.15e-06	2.52e-05	9.62e-06	1.78e-05	0.305707	0.447901	-0.607546
K10038	0	0	4.55e-06	0	0	0	3.34e-06	0	0	0	4.93e-06	0	0	0	0	6.3e-06	9.62e-06	0	0.305416	0.447608	-0.145203
K07221	4.96e-05	5.62e-05	4.55e-05	5.11e-05	5.01e-05	2.57e-05	4.67e-05	5.98e-05	3.65e-05	3.75e-05	3.94e-05	3.4e-05	4.2e-05	4.86e-05	5.7e-05	4.41e-05	4.33e-05	3.55e-05	0.305084	0.447256	1.32217
K02688	2.48e-05	1.98e-05	9.1e-06	4.26e-06	2.73e-05	1.71e-05	1e-05	2.72e-05	1.82e-05	4.68e-06	9.86e-06	1.13e-05	1.87e-05	1.21e-05	2.85e-05	1.26e-05	1.44e-05	1.18e-05	0.304969	0.447221	0.546365
K09726	4.96e-06	1.32e-05	4.55e-06	4.26e-06	4.55e-06	8.55e-06	2e-05	1.63e-05	1.09e-05	9.37e-06	1.48e-05	2.84e-05	4.67e-06	1.21e-05	4.07e-06	1.89e-05	4.81e-06	2.37e-05	0.304246	0.446294	-0.408022
K04749	0.000114065	0.000112399	9.56e-05	8.94e-05	8.65e-05	6.84e-05	0.000110093	8.7e-05	9.85e-05	8.43e-05	5.92e-05	7.94e-05	9.34e-05	0.000133578	7.74e-05	0.000119754	5.77e-05	5.92e-05	0.304238	0.446294	1.09117
K16784	1.49e-05	1.65e-05	2.28e-05	1.28e-05	1.37e-05	8.55e-06	2.67e-05	1.63e-05	2.92e-05	2.34e-05	1.97e-05	2.84e-05	4.67e-06	2.43e-05	1.22e-05	3.15e-05	1.92e-05	3.55e-05	0.304058	0.446286	-0.633922
K12053	0	3.31e-06	4.55e-06	0	0	0	3.34e-06	0	3.65e-06	0	0	0	0	0	0	0	0	5.92e-06	0.303769	0.445996	0.153298
K12370	4.96e-06	0	4.55e-06	0	0	0	0	0	0	4.68e-06	4.93e-06	0	0	6.07e-06	0	0	4.81e-06	0	0.303455	0.445668	-0.180309
K03057	4.96e-06	1.65e-05	4.55e-06	4.26e-06	4.55e-06	8.55e-06	1.33e-05	1.09e-05	7.3e-06	1.4e-05	9.86e-06	1.7e-05	4.67e-06	1.21e-05	4.07e-06	1.89e-05	4.81e-06	1.18e-05	0.303371	0.445668	-0.508499
K05939	5.95e-05	4.3e-05	2.73e-05	2.98e-05	3.19e-05	3.42e-05	6.01e-05	1.63e-05	5.11e-05	9.37e-06	1.48e-05	2.84e-05	2.8e-05	6.68e-05	1.22e-05	6.93e-05	4.81e-06	2.96e-05	0.30303	0.445312	0.453208
K16074	9.92e-06	9.92e-06	0	4.26e-06	9.1e-06	4.28e-06	1.33e-05	0	1.46e-05	0	9.86e-06	0	0	1.21e-05	0	1.26e-05	0	5.92e-06	0.303	0.445312	0.281074
K09792	0	3.31e-06	9.1e-06	4.26e-06	4.55e-06	0	6.67e-06	0	7.3e-06	9.37e-06	0	0	4.67e-06	1.21e-05	4.07e-06	1.26e-05	4.81e-06	5.92e-06	0.302626	0.444984	-0.320163
K09748	0.00115057	0.00113061	0.00108769	0.00112869	0.00111509	0.00117201	0.00113763	0.00100631	0.00114201	0.00120812	0.00116351	0.00106643	0.00126128	0.00109291	0.00107941	0.00111561	0.00118765	0.00115439	0.302193	0.444482	-5.22976
K02912	9.92e-06	9.92e-06	9.1e-06	4.26e-06	4.55e-06	1.28e-05	1.33e-05	2.72e-05	1.82e-05	9.37e-06	1.97e-05	2.27e-05	9.34e-06	1.82e-05	8.15e-06	1.89e-05	9.62e-06	2.37e-05	0.302073	0.444439	-0.542839
K03226	0	9.92e-06	4.55e-06	8.52e-06	9.1e-06	0	6.67e-06	5.44e-06	7.3e-06	4.68e-06	1.48e-05	5.67e-06	4.67e-06	1.21e-05	4.07e-06	1.26e-05	4.81e-06	5.92e-06	0.301953	0.444396	-0.450127
K11261	4.46e-05	5.29e-05	6.83e-05	7.67e-05	2.73e-05	1.71e-05	5.67e-05	3.26e-05	4.38e-05	7.49e-05	7.4e-05	6.81e-05	3.74e-05	6.07e-05	3.26e-05	6.3e-05	2.88e-05	6.51e-05	0.301638	0.444066	-0.726498
K19789	2.48e-05	4.3e-05	1.37e-05	1.7e-05	1.82e-05	2.99e-05	2.67e-05	2.18e-05	2.55e-05	2.81e-05	2.47e-05	2.27e-05	2.34e-05	5.46e-05	1.22e-05	5.67e-05	2.4e-05	2.96e-05	0.301469	0.44395	-0.596268
K05303	1.98e-05	1.32e-05	3.64e-05	1.7e-05	2.28e-05	3.85e-05	2.34e-05	1.09e-05	2.92e-05	1.4e-05	9.86e-06	1.13e-05	1.87e-05	1.21e-05	3.26e-05	2.52e-05	2.4e-05	2.37e-05	0.301456	0.44395	0.640549
K09136	2.98e-05	3.97e-05	5.01e-05	2.56e-05	2.28e-05	4.28e-05	3e-05	4.9e-05	2.19e-05	2.34e-05	1.48e-05	3.4e-05	5.14e-05	3.04e-05	2.04e-05	2.52e-05	3.85e-05	2.37e-05	0.300707	0.443095	0.766829
K03072	0.000243007	0.000228104	0.000277611	0.000200182	0.000245774	0.000183928	0.000266893	0.000233899	0.000215267	0.000196672	0.000197206	0.000232573	0.000191528	0.00024894	0.000158857	0.000277326	0.000211565	0.000230877	0.299324	0.44119	1.81774
K02053	2.98e-05	3.64e-05	3.64e-05	5.54e-05	1.82e-05	3.85e-05	3.67e-05	2.18e-05	3.65e-05	3.28e-05	9.86e-06	2.27e-05	4.2e-05	2.43e-05	3.67e-05	1.89e-05	4.33e-05	2.96e-05	0.299277	0.44119	0.7719
K16957	2.98e-05	1.65e-05	3.19e-05	2.98e-05	5.01e-05	3.85e-05	3.34e-05	3.26e-05	3.65e-05	3.28e-05	2.47e-05	2.27e-05	5.14e-05	6.07e-05	4.48e-05	6.3e-05	3.37e-05	2.37e-05	0.298828	0.440724	-0.755815
K03823	0.000396747	0.000370257	0.000432345	0.000455734	0.000409623	0.000384966	0.000420356	0.000397084	0.000372157	0.000412074	0.000384551	0.000442455	0.000359699	0.000467522	0.000443985	0.000504229	0.000370239	0.000432155	0.298139	0.439841	-2.82942
K03649	1.49e-05	9.92e-06	1.37e-05	0	0	4.28e-06	6.67e-06	1.09e-05	1.09e-05	0	1.97e-05	1.13e-05	4.67e-06	3.04e-05	0	3.15e-05	4.81e-06	1.18e-05	0.297608	0.439189	-0.291953
K09740	4.96e-06	2.31e-05	1.82e-05	2.13e-05	4.55e-06	1.71e-05	1.33e-05	1.09e-05	1.46e-05	1.4e-05	9.86e-06	1.13e-05	0	1.21e-05	8.15e-06	2.52e-05	4.81e-06	1.18e-05	0.297083	0.438546	0.495191
K03050	4.96e-06	9.92e-06	9.1e-06	4.26e-06	4.55e-06	8.55e-06	1.33e-05	1.09e-05	7.3e-06	9.37e-06	9.86e-06	1.7e-05	4.67e-06	1.21e-05	4.07e-06	1.26e-05	4.81e-06	1.78e-05	0.29664	0.438025	-0.576007
K19427	0.000218211	0.000125623	0.000200244	0.000174627	0.00013199	0.000149709	0.000200169	0.000206701	0.000178781	0.000196672	0.000167625	0.000215555	0.000182185	0.000188223	0.000203663	0.000163874	0.000216373	0.000177598	0.296314	0.437676	-1.7813
K18471	1.49e-05	1.32e-05	1.82e-05	2.13e-05	1.82e-05	1.71e-05	1.33e-05	0	1.46e-05	9.37e-06	4.93e-06	1.13e-05	0	1.82e-05	1.22e-05	1.89e-05	9.62e-06	1.78e-05	0.295773	0.437008	0.557018
K20429	5.46e-05	4.63e-05	4.55e-05	5.11e-05	5.92e-05	1.71e-05	5e-05	2.18e-05	2.92e-05	2.81e-05	3.94e-05	2.27e-05	9.34e-06	4.86e-05	2.44e-05	6.93e-05	2.88e-05	2.96e-05	0.295065	0.436093	0.617849
K12297	1.49e-05	6.61e-06	1.37e-05	8.52e-06	4.55e-06	4.28e-06	1.33e-05	0	1.46e-05	4.68e-06	9.86e-06	1.13e-05	0	6.07e-06	4.07e-06	6.3e-06	4.81e-06	1.18e-05	0.294916	0.436006	0.441136
K02383	1.49e-05	9.92e-06	1.82e-05	1.28e-05	1.37e-05	8.55e-06	1.33e-05	5.44e-06	1.46e-05	1.4e-05	2.47e-05	1.13e-05	4.67e-06	3.04e-05	8.15e-06	3.15e-05	9.62e-06	1.18e-05	0.294836	0.436006	-0.506539
K21962	0	0	4.55e-06	8.52e-06	4.55e-06	0	0	5.44e-06	0	0	0	0	0	6.07e-06	4.07e-06	0	0	0	0.294827	0.436006	0.175528
K03111	0.00214243	0.00230749	0.00208891	0.00215515	0.0023121	0.00233974	0.00213514	0.00187119	0.00222929	0.00239752	0.00239112	0.00219526	0.00220491	0.0023619	0.00194294	0.00245812	0.00201468	0.00237389	0.294525	0.435823	-3.59773
K01809	0.000565364	0.000561996	0.000518814	0.0005324	0.000568921	0.000474791	0.000553802	0.000500435	0.000554587	0.000557236	0.000576826	0.000584268	0.000509184	0.000588957	0.000509157	0.000567258	0.000557762	0.000526874	0.294274	0.435582	-4.5863
K09960	9.92e-06	1.65e-05	2.28e-05	1.7e-05	3.19e-05	2.57e-05	1.33e-05	2.72e-05	1.46e-05	1.87e-05	1.48e-05	2.84e-05	1.4e-05	3.64e-05	8.15e-06	3.15e-05	3.37e-05	3.55e-05	0.294121	0.435487	-0.648951
K05590	4.96e-06	3.31e-06	9.1e-06	0	0	4.28e-06	3.34e-06	0	0	0	0	5.67e-06	0	6.07e-06	0	0	0	0	0.293243	0.434319	0.190557
K02786	0	6.61e-06	0	4.26e-06	4.55e-06	4.28e-06	3.34e-06	0	0	0	0	0	0	0	0	0	9.62e-06	0	0.292814	0.433815	0.167582
K03090	0.000198373	0.000125623	0.000150183	0.000140554	0.000127438	0.000111212	0.000123438	0.000135988	0.000131349	0.000112384	0.000123253	0.000102105	9.34e-05	0.000188223	0.000101831	0.000163874	0.000120207	0.000106559	0.292147	0.432958	1.22932
K05685	2.48e-05	9.92e-06	1.82e-05	8.52e-06	9.1e-06	1.28e-05	6.67e-06	5.44e-06	1.09e-05	9.37e-06	4.93e-06	5.67e-06	4.67e-06	2.43e-05	0	1.89e-05	4.81e-06	0	0.292101	0.432958	0.366797
K17203	1.98e-05	3.31e-06	9.1e-06	8.52e-06	9.1e-06	1.28e-05	1e-05	1.09e-05	1.09e-05	1.87e-05	9.86e-06	1.7e-05	4.67e-06	3.04e-05	4.07e-06	3.15e-05	9.62e-06	5.92e-06	0.29193	0.432898	-0.418899
K15045	2.98e-05	2.31e-05	2.28e-05	4.26e-06	4.55e-06	8.55e-06	6.67e-06	0	2.55e-05	1.87e-05	1.48e-05	5.67e-06	4.67e-06	6.07e-06	0	1.26e-05	9.62e-06	1.18e-05	0.291297	0.43209	0.350855
K20489	4.96e-06	0	4.55e-06	0	0	4.28e-06	0	0	0	0	0	0	4.67e-06	0	0	0	0	0	0.290549	0.431111	0.140648
K19664	4.96e-06	9.92e-06	4.55e-06	4.26e-06	4.55e-06	8.55e-06	1.33e-05	1.09e-05	7.3e-06	9.37e-06	9.86e-06	1.7e-05	4.67e-06	1.21e-05	4.07e-06	1.26e-05	4.81e-06	1.18e-05	0.2891	0.429091	-0.600492
K00860	2.48e-05	3.64e-05	5.01e-05	2.13e-05	3.64e-05	3.85e-05	2e-05	5.44e-05	2.92e-05	2.81e-05	9.86e-06	1.13e-05	1.87e-05	5.46e-05	2.04e-05	5.04e-05	2.88e-05	2.37e-05	0.289014	0.429091	0.59686
K06176	9.92e-06	1.32e-05	1.37e-05	1.28e-05	9.1e-06	8.55e-06	1.67e-05	1.09e-05	1.46e-05	1.87e-05	9.86e-06	1.7e-05	9.34e-06	1.82e-05	8.15e-06	1.89e-05	1.44e-05	1.18e-05	0.288622	0.428641	-0.978255
K04034	4.96e-06	3.31e-06	0	0	0	0	0	0	0	0	0	5.67e-06	0	6.07e-06	0	1.26e-05	0	0	0.287821	0.427583	-0.14255
K03767	1.98e-05	2.64e-05	3.19e-05	3.83e-05	2.73e-05	7.27e-05	3.67e-05	4.9e-05	3.65e-05	4.21e-05	1.48e-05	3.97e-05	2.34e-05	1.82e-05	3.26e-05	2.52e-05	5.29e-05	2.37e-05	0.287086	0.426619	0.652455
K10213	1.49e-05	1.32e-05	1.82e-05	0	4.55e-06	1.28e-05	1.67e-05	2.18e-05	2.19e-05	2.81e-05	9.86e-06	3.4e-05	1.4e-05	6.07e-06	2.04e-05	1.26e-05	1.92e-05	1.78e-05	0.286568	0.425979	-0.531793
K22293	1.98e-05	2.31e-05	1.37e-05	2.56e-05	3.19e-05	2.57e-05	2.67e-05	3.26e-05	2.55e-05	1.4e-05	2.47e-05	3.97e-05	5.14e-05	1.82e-05	6.52e-05	1.89e-05	2.88e-05	2.37e-05	0.285678	0.424785	-0.601303
K08319	0	3.31e-06	0	0	0	0	0	0	3.65e-06	0	0	0	0	6.07e-06	0	6.3e-06	0	5.92e-06	0.285145	0.424122	-0.158239
K09994	9.92e-06	9.92e-06	9.1e-06	4.26e-06	9.1e-06	0	3.34e-06	5.44e-06	7.3e-06	4.68e-06	0	1.13e-05	0	6.07e-06	8.15e-06	0	4.81e-06	5.92e-06	0.284614	0.423461	0.40495
K03590	0.000461218	0.000396703	0.000436896	0.000396105	0.000414175	0.000402075	0.000423692	0.000304613	0.000350265	0.000355882	0.000384551	0.00036304	0.000341013	0.000418949	0.000268835	0.000504229	0.000245223	0.000402555	0.284216	0.422998	1.62411
K04653	5.46e-05	6.61e-05	6.37e-05	5.11e-05	6.37e-05	5.99e-05	7.01e-05	7.62e-05	6.57e-05	7.02e-05	6.9e-05	5.67e-05	6.54e-05	4.86e-05	5.3e-05	3.78e-05	6.73e-05	5.92e-05	0.284185	0.422998	1.78323
K06875	4.96e-06	9.92e-06	9.1e-06	4.26e-06	4.55e-06	4.28e-06	1e-05	5.44e-06	1.09e-05	4.68e-06	9.86e-06	1.7e-05	4.67e-06	1.21e-05	4.07e-06	1.26e-05	4.81e-06	1.18e-05	0.283957	0.422868	-0.569011
K03436	0.000243007	0.000201658	0.000218448	0.00026407	0.00023212	0.000252366	0.00024354	0.000266536	0.00020797	0.000196672	0.000157764	0.000164503	0.000238242	0.00017608	0.000301421	0.000182783	0.000322156	0.000171678	0.283282	0.421992	1.3235
K03636	4.96e-06	6.61e-06	9.1e-06	1.28e-05	9.1e-06	8.55e-06	6.67e-06	1.09e-05	1.09e-05	1.4e-05	1.97e-05	0	1.87e-05	1.21e-05	8.15e-06	3.15e-05	9.62e-06	0	0.283269	0.421992	-0.404703
K16962	9.92e-06	1.98e-05	1.37e-05	1.7e-05	4.55e-06	1.28e-05	1.67e-05	2.72e-05	1.82e-05	2.81e-05	2.96e-05	2.27e-05	1.4e-05	1.21e-05	8.15e-06	1.89e-05	9.62e-06	3.55e-05	0.282274	0.420747	-0.589661
K00065	4.96e-05	4.3e-05	3.64e-05	7.67e-05	6.37e-05	4.71e-05	5.34e-05	8.7e-05	5.47e-05	5.62e-05	3.94e-05	0.00011345	6.54e-05	6.07e-05	7.74e-05	6.3e-05	5.29e-05	7.1e-05	0.28224	0.420747	-0.908493
K01990	0.00421047	0.00483978	0.00462836	0.00499604	0.00504292	0.00501311	0.00460056	0.00456919	0.00459723	0.00453281	0.00464912	0.0049918	0.0041996	0.00451736	0.0048268	0.00441831	0.00425534	0.00482474	0.282042	0.420656	4.69522
K01392	4.96e-06	0	9.1e-06	0	0	0	3.34e-06	0	0	4.68e-06	0	5.67e-06	0	6.07e-06	4.07e-06	6.3e-06	4.81e-06	0	0.281469	0.41993	-0.248644
K03928	5.46e-05	6.28e-05	6.37e-05	3.83e-05	3.19e-05	5.13e-05	6.67e-05	2.18e-05	4.74e-05	4.68e-05	6.9e-05	6.81e-05	3.74e-05	7.89e-05	3.67e-05	7.56e-05	3.85e-05	6.51e-05	0.28129	0.41979	-0.887036
K00608	0	3.31e-06	0	0	0	0	6.67e-06	0	3.65e-06	4.68e-06	4.93e-06	5.67e-06	0	0	0	0	4.81e-06	5.92e-06	0.281135	0.419688	-0.231027
K03980	0.000208292	0.000185128	0.000213897	0.000187405	0.000172952	0.000136877	0.000213514	0.000168625	0.000178781	0.000117066	0.000152834	0.000141813	0.000121457	0.00024894	0.000101831	0.000271023	0.000149057	0.000147998	0.281083	0.419688	1.05401
K07041	9.92e-06	9.92e-06	4.55e-06	1.28e-05	4.55e-06	8.55e-06	1e-05	1.09e-05	7.3e-06	4.68e-06	9.86e-06	1.13e-05	9.34e-06	1.21e-05	4.07e-06	1.89e-05	1.44e-05	1.18e-05	0.280637	0.4192	-0.704204
K09683	0	3.31e-06	0	4.26e-06	4.55e-06	4.28e-06	3.34e-06	5.44e-06	3.65e-06	0	0	0	0	6.07e-06	0	6.3e-06	4.81e-06	0	0.280555	0.4192	0.285618
K15914	0	0	0	4.26e-06	4.55e-06	0	0	5.44e-06	0	4.68e-06	4.93e-06	0	0	6.07e-06	0	6.3e-06	4.81e-06	0	0.280455	0.419184	-0.236779
K03694	3.97e-05	3.64e-05	4.55e-05	4.26e-05	5.46e-05	5.13e-05	6.34e-05	4.9e-05	5.84e-05	3.75e-05	4.44e-05	3.4e-05	5.14e-05	6.07e-05	4.07e-05	5.04e-05	4.81e-05	2.96e-05	0.280036	0.418685	1.37661
K17734	0.000128943	0.000119011	0.000113775	0.000140554	0.000168401	0.000153986	0.000150127	0.000146867	0.000134998	9.83e-05	0.000123253	0.00013614	0.000144814	0.000109291	0.000199589	8.82e-05	0.000120207	0.000112479	0.279951	0.418685	1.3923
K15303	0	3.31e-06	0	0	0	0	3.34e-06	0	3.65e-06	0	4.93e-06	5.67e-06	0	6.07e-06	0	0	4.81e-06	0	0.279882	0.418685	-0.20613
K07010	0.000347153	0.000476044	0.000473304	0.000481289	0.000350456	0.000384966	0.000463726	0.000413403	0.000430534	0.000501044	0.00036976	0.000504853	0.000453127	0.000473594	0.000411399	0.000378172	0.000447171	0.000556473	0.27878	0.417189	-2.09889
K01921	0.00107617	0.00115044	0.00110134	0.00111165	0.00114695	0.00109074	0.00101086	0.00105526	0.00101066	0.00116598	0.00115858	0.00111748	0.00108377	0.0011172	0.00107941	0.00102737	0.00113476	0.00109519	0.278549	0.416972	-6.37527
K02485	0	0	4.55e-06	0	0	8.55e-06	3.34e-06	0	0	0	0	0	0	0	0	0	4.81e-06	0	0.278399	0.416874	0.133287
K02064	9.92e-06	9.92e-06	9.1e-06	1.28e-05	9.1e-06	4.28e-06	1.67e-05	1.63e-05	1.09e-05	1.4e-05	2.47e-05	2.27e-05	0	1.82e-05	4.07e-06	1.89e-05	9.62e-06	1.78e-05	0.278278	0.416822	-0.539673
K19168	0	6.61e-06	1.37e-05	4.26e-06	0	8.55e-06	0	0	0	0	4.93e-06	0	4.67e-06	0	0	0	4.81e-06	0	0.278185	0.41681	0.18547
K15554	4.96e-05	3.64e-05	7.28e-05	2.98e-05	4.55e-05	6.42e-05	4.34e-05	5.44e-05	4.74e-05	3.75e-05	1.48e-05	5.67e-05	3.74e-05	3.04e-05	5.3e-05	5.04e-05	3.85e-05	5.92e-05	0.277874	0.41647	0.915318
K12308	0.000366991	0.000452903	0.000418692	0.000400365	0.000373212	0.000346469	0.00041702	0.000494996	0.0003904	0.000351199	0.000483154	0.000470818	0.000401742	0.000437164	0.000529523	0.000365566	0.000490446	0.000390715	0.277777	0.416453	-2.13831
K21364	9.92e-06	9.92e-06	1.37e-05	1.28e-05	1.37e-05	4.28e-06	6.67e-06	1.63e-05	7.3e-06	0	9.86e-06	5.67e-06	9.34e-06	6.07e-06	1.63e-05	1.26e-05	0	1.18e-05	0.277585	0.416293	0.53009
K08322	1.49e-05	2.64e-05	2.73e-05	2.13e-05	1.37e-05	1.71e-05	1.67e-05	2.18e-05	2.19e-05	2.81e-05	2.96e-05	2.27e-05	4.2e-05	1.21e-05	3.26e-05	1.26e-05	2.88e-05	1.18e-05	0.276677	0.415057	-0.752134
K14092	0	3.31e-06	0	0	0	0	3.34e-06	0	0	0	0	5.67e-06	0	0	0	6.3e-06	0	5.92e-06	0.276638	0.415057	-0.160391
K02966	1.49e-05	1.65e-05	1.37e-05	8.52e-06	9.1e-06	8.55e-06	1.67e-05	1.63e-05	1.82e-05	1.4e-05	2.47e-05	2.84e-05	4.67e-06	3.04e-05	4.07e-06	1.89e-05	4.81e-06	3.55e-05	0.276573	0.415057	-0.492255
K02196	4.96e-06	3.31e-06	4.55e-06	4.26e-06	4.55e-06	4.28e-06	3.34e-06	5.44e-06	3.65e-06	4.68e-06	4.93e-06	0	4.67e-06	0	4.07e-06	6.3e-06	4.81e-06	0	0.276199	0.414722	0.561891
K09970	4.96e-06	3.31e-06	4.55e-06	4.26e-06	4.55e-06	4.28e-06	3.34e-06	5.44e-06	3.65e-06	4.68e-06	4.93e-06	0	4.67e-06	0	4.07e-06	6.3e-06	4.81e-06	0	0.276199	0.414722	0.561891
K01194	8.93e-05	4.63e-05	5.01e-05	3.83e-05	8.65e-05	6.42e-05	5.67e-05	7.07e-05	5.47e-05	6.09e-05	3.94e-05	1.7e-05	6.54e-05	3.64e-05	8.15e-05	4.41e-05	8.65e-05	2.37e-05	0.27575	0.414303	0.731969
K08640	6.94e-05	3.97e-05	7.74e-05	4.69e-05	5.46e-05	6.42e-05	6.34e-05	5.44e-05	5.84e-05	4.21e-05	5.92e-05	5.67e-05	4.2e-05	6.07e-05	6.11e-05	5.04e-05	6.73e-05	3.55e-05	0.275247	0.413674	1.38811
K02977	4.96e-06	1.32e-05	9.1e-06	8.52e-06	4.55e-06	8.55e-06	1.33e-05	1.09e-05	1.46e-05	4.68e-06	1.97e-05	1.7e-05	9.34e-06	1.21e-05	4.07e-06	1.26e-05	1.92e-05	1.18e-05	0.275074	0.413541	-0.642251
K20487	2.98e-05	2.31e-05	3.19e-05	2.98e-05	2.28e-05	3.85e-05	2e-05	3.26e-05	2.55e-05	1.4e-05	9.86e-06	2.84e-05	1.87e-05	2.43e-05	4.07e-05	2.52e-05	3.85e-05	1.18e-05	0.274914	0.413427	0.809386
K05817	0	3.31e-06	4.55e-06	0	4.55e-06	0	3.34e-06	0	0	0	0	0	0	0	0	0	0	5.92e-06	0.274583	0.413056	0.163287
K09992	1.98e-05	3.97e-05	2.28e-05	2.13e-05	1.82e-05	1.71e-05	2.67e-05	2.18e-05	1.82e-05	1.87e-05	1.97e-05	2.27e-05	1.4e-05	2.43e-05	8.15e-06	1.89e-05	4.81e-06	3.55e-05	0.273901	0.412157	0.712062
K01138	2.48e-05	3.31e-05	2.73e-05	2.13e-05	9.1e-06	1.28e-05	4e-05	2.18e-05	4.38e-05	1.87e-05	3.45e-05	2.84e-05	2.34e-05	3.04e-05	2.85e-05	4.41e-05	2.88e-05	4.74e-05	0.273647	0.411902	-0.767484
K05805	4.96e-06	3.31e-06	4.55e-06	4.26e-06	4.55e-06	4.28e-06	6.67e-06	5.44e-06	1.09e-05	4.68e-06	0	5.67e-06	9.34e-06	0	4.07e-06	0	9.62e-06	0	0.273613	0.411902	0.393809
K03695	0.00066951	0.000608279	0.000609834	0.000651657	0.000673603	0.000568894	0.000627198	0.0006745	0.000638504	0.000660255	0.000596547	0.000623975	0.000616626	0.000595028	0.000627281	0.000630287	0.000639503	0.000586073	0.27346	0.411872	5.74162
K03042	9.92e-06	1.32e-05	1.37e-05	4.26e-06	4.55e-06	1.28e-05	2e-05	2.18e-05	7.3e-06	1.4e-05	1.48e-05	1.7e-05	9.34e-06	2.43e-05	4.07e-06	1.89e-05	9.62e-06	2.96e-05	0.27307	0.411413	-0.544508
K17234	1.49e-05	2.98e-05	1.82e-05	1.28e-05	2.28e-05	1.28e-05	3.34e-05	3.26e-05	3.28e-05	1.4e-05	9.86e-06	3.97e-05	9.34e-06	2.43e-05	2.04e-05	2.52e-05	1.44e-05	5.92e-06	0.273025	0.411413	0.592124
K03501	0.00124479	0.00124631	0.00118781	0.00120961	0.00121522	0.00120623	0.00120435	0.00114774	0.00113106	0.001269	0.00126705	0.00124795	0.00126128	0.00125685	0.00110793	0.00119124	0.00114918	0.00129646	0.272662	0.411051	-6.42288
K19002	0.000104146	0.000119011	0.000145632	0.000119258	9.56e-05	0.000106935	0.000103421	0.000163185	0.000105809	9.83e-05	9.37e-05	0.00013614	0.000107442	7.89e-05	9.78e-05	8.82e-05	0.000134632	0.000124318	0.272337	0.410686	1.45955
K03222	4.96e-06	6.61e-06	4.55e-06	8.52e-06	9.1e-06	0	6.67e-06	5.44e-06	3.65e-06	4.68e-06	9.86e-06	5.67e-06	4.67e-06	1.21e-05	4.07e-06	1.26e-05	4.81e-06	5.92e-06	0.271941	0.410216	-0.572918
K00823	2.48e-05	1.65e-05	1.82e-05	2.13e-05	1.37e-05	3.42e-05	2.67e-05	2.18e-05	2.19e-05	9.37e-06	9.86e-06	1.13e-05	2.34e-05	3.04e-05	1.63e-05	3.15e-05	1.92e-05	1.18e-05	0.271385	0.409504	0.755544
K05815	8.93e-05	0.000105788	8.65e-05	0.00010648	0.000113784	5.99e-05	0.000126774	0.000130548	0.000113106	4.68e-05	7.89e-05	7.94e-05	8.41e-05	0.000157865	7.33e-05	0.000138663	7.69e-05	4.74e-05	0.271352	0.409504	0.864793
K02585	2.98e-05	2.31e-05	2.28e-05	3.83e-05	5.01e-05	3.85e-05	3e-05	2.72e-05	1.82e-05	2.81e-05	3.94e-05	3.97e-05	2.8e-05	4.25e-05	4.48e-05	5.04e-05	1.44e-05	4.14e-05	0.270861	0.408965	-0.899695
K01213	4.96e-06	3.31e-06	4.55e-06	4.26e-06	4.55e-06	4.28e-06	3.34e-06	5.44e-06	3.65e-06	4.68e-06	4.93e-06	5.67e-06	4.67e-06	6.07e-06	1.22e-05	6.3e-06	4.81e-06	0	0.27066	0.408787	-0.600252
K16874	4.96e-06	3.31e-06	0	0	0	0	3.34e-06	0	3.65e-06	0	0	5.67e-06	0	0	0	0	0	0	0.270459	0.408611	0.164354
K02924	4.96e-06	9.92e-06	9.1e-06	4.26e-06	4.55e-06	4.28e-06	1e-05	1.09e-05	7.3e-06	9.37e-06	9.86e-06	1.13e-05	4.67e-06	1.21e-05	4.07e-06	1.26e-05	4.81e-06	1.18e-05	0.269016	0.406556	-0.721565
K02337	0.000853005	0.000839689	0.000860139	0.000830544	0.000855658	0.000748545	0.000847384	0.00077785	0.000842826	0.00089907	0.000833194	0.000890583	0.00085954	0.000843969	0.000867603	0.000819372	0.000778944	0.00084655	0.26901	0.406556	-6.24142
K08998	0.000733981	0.000819854	0.000778221	0.000830544	0.00076463	0.000804151	0.000804014	0.000696258	0.000817286	0.000814782	0.000838124	0.000833858	0.000808154	0.000789323	0.0007006	0.000888704	0.000745285	0.000893909	0.268731	0.406375	-4.12831
K08315	0	6.61e-06	4.55e-06	0	0	4.28e-06	1e-05	0	7.3e-06	0	4.93e-06	5.67e-06	0	0	0	0	0	5.92e-06	0.268664	0.406375	0.230357
K01966	6.45e-05	4.96e-05	5.46e-05	4.69e-05	3.64e-05	4.71e-05	5e-05	7.62e-05	5.47e-05	4.68e-05	4.93e-05	5.67e-05	2.8e-05	6.07e-05	4.07e-05	6.3e-05	2.88e-05	4.74e-05	0.268031	0.405568	1.16972
K02473	6.45e-05	7.27e-05	6.37e-05	4.26e-05	6.83e-05	5.99e-05	9.67e-05	8.16e-05	9.49e-05	6.09e-05	6.41e-05	9.08e-05	6.54e-05	4.86e-05	4.48e-05	4.41e-05	5.29e-05	8.88e-05	0.267969	0.405568	1.08495
K07076	4.96e-06	1.32e-05	9.1e-06	8.52e-06	9.1e-06	2.57e-05	2e-05	1.09e-05	1.46e-05	1.4e-05	4.93e-06	5.67e-06	1.87e-05	1.82e-05	4.07e-06	1.26e-05	0	5.92e-06	0.267906	0.405568	0.476064
K03435	0	3.31e-06	0	0	0	0	3.34e-06	0	0	0	0	5.67e-06	4.67e-06	0	0	0	9.62e-06	0	0.267741	0.405505	-0.152207
K02795	7.44e-05	5.29e-05	4.55e-05	5.54e-05	2.28e-05	4.28e-05	4e-05	7.07e-05	6.2e-05	3.28e-05	3.94e-05	3.4e-05	5.61e-05	4.25e-05	6.11e-05	2.52e-05	5.77e-05	4.74e-05	0.26744	0.405175	0.935399
K07503	4.96e-06	3.31e-06	4.55e-06	0	0	0	3.34e-06	0	7.3e-06	9.37e-06	0	1.13e-05	0	6.07e-06	0	0	4.81e-06	1.18e-05	0.26666	0.404117	-0.256839
K07570	3.97e-05	6.61e-05	8.19e-05	3.83e-05	4.1e-05	5.13e-05	3.67e-05	4.35e-05	5.84e-05	5.62e-05	4.44e-05	6.81e-05	7.47e-05	7.89e-05	2.85e-05	5.67e-05	4.33e-05	9.47e-05	0.266615	0.404117	-0.865244
K01905	8.43e-05	6.61e-05	5.46e-05	5.11e-05	6.83e-05	3.85e-05	7.01e-05	5.98e-05	7.3e-05	2.81e-05	5.92e-05	3.4e-05	2.8e-05	9.11e-05	8.15e-06	9.45e-05	1.44e-05	8.29e-05	0.265978	0.403334	0.614943
K00647	0.000168617	9.26e-05	0.000159285	7.67e-05	9.1e-05	0.000124045	0.000126774	0.000130548	8.76e-05	7.49e-05	0.000113393	6.81e-05	9.81e-05	0.000151793	0.000105905	0.00013236	9.14e-05	7.1e-05	0.265169	0.402232	1.00578
K06891	4.46e-05	5.29e-05	7.28e-05	5.54e-05	6.37e-05	6.84e-05	7.01e-05	9.25e-05	5.84e-05	3.75e-05	4.93e-05	2.84e-05	5.61e-05	8.5e-05	6.11e-05	8.82e-05	5.77e-05	2.37e-05	0.265129	0.402232	0.89322
K09125	0.000312438	0.000350421	0.000286713	0.000281107	0.000291288	0.000286586	0.000300254	0.000266536	0.000335671	0.000248181	0.000236647	0.000260935	0.000280285	0.00035216	0.000285128	0.000359263	0.000245223	0.000260477	0.264787	0.401901	2.20914
K03168	0.000857965	0.000833077	0.000787323	0.000775174	0.000851106	0.000782764	0.00076398	0.00078329	0.000788097	0.000861609	0.000843054	0.000839531	0.000784797	0.00077718	0.000802431	0.000794161	0.000798177	0.000929429	0.264634	0.401794	-5.44136
K10005	2.48e-05	6.61e-06	4.55e-06	4.26e-06	9.1e-06	0	6.67e-06	0	1.09e-05	1.4e-05	1.48e-05	1.13e-05	4.67e-06	6.07e-06	8.15e-06	6.3e-06	1.44e-05	1.78e-05	0.264421	0.401595	-0.414465
K07088	0.000902599	0.00106449	0.00103763	0.00114146	0.00100585	0.00104368	0.00106423	0.00114774	0.00111647	0.00102082	0.00108956	0.00112883	0.00109778	0.00109898	0.00121383	0.00101476	0.00113957	0.00105967	0.263941	0.40099	-4.41282
K00175	0.000644713	0.000621502	0.000587079	0.000592028	0.000509754	0.00054323	0.000630534	0.000685379	0.000642153	0.000519775	0.000562036	0.00052187	0.000583927	0.000667889	0.000517303	0.000712224	0.000519296	0.000538713	0.263284	0.400117	2.62188
K01525	2.48e-05	1.32e-05	1.82e-05	1.28e-05	1.37e-05	1.71e-05	1e-05	1.09e-05	1.09e-05	1.4e-05	1.48e-05	0	1.87e-05	1.21e-05	1.63e-05	1.26e-05	1.44e-05	0	0.263123	0.399996	0.633707
K06167	0.000366991	0.000353727	0.000314019	0.000332217	0.000336801	0.000325082	0.000397003	0.000315492	0.000412291	0.000351199	0.000305669	0.000311988	0.000336342	0.000303586	0.000329934	0.000346658	0.000384663	0.000331516	0.262652	0.399404	3.14524
K07100	0	3.31e-06	4.55e-06	0	4.55e-06	4.28e-06	3.34e-06	0	7.3e-06	4.68e-06	0	0	0	6.07e-06	4.07e-06	0	0	0	0.26231	0.399007	0.262174
K19804	9.92e-06	6.61e-06	1.37e-05	4.26e-06	4.55e-06	8.55e-06	3.34e-06	1.09e-05	3.65e-06	4.68e-06	4.93e-06	0	9.34e-06	6.07e-06	4.07e-06	1.26e-05	4.81e-06	0	0.262249	0.399007	0.459196
K07636	0.000813331	0.00080663	0.000750915	0.000792211	0.000778284	0.000774209	0.000790669	0.000870322	0.000817286	0.000791369	0.000734591	0.000743098	0.000756769	0.00081361	0.000830944	0.000756344	0.000855876	0.000698551	0.262056	0.39887	5.19083
K07707	6.45e-05	6.28e-05	7.28e-05	8.09e-05	0.000113784	0.000106935	4e-05	4.9e-05	3.28e-05	7.49e-05	7.89e-05	4.54e-05	4.67e-05	5.46e-05	3.67e-05	5.67e-05	2.88e-05	8.29e-05	0.261647	0.398371	0.747072
K00841	5.46e-05	2.98e-05	6.37e-05	5.54e-05	5.46e-05	6.84e-05	5e-05	4.35e-05	4.01e-05	4.68e-05	3.94e-05	3.4e-05	4.2e-05	2.43e-05	4.89e-05	2.52e-05	7.21e-05	5.92e-05	0.261529	0.398315	0.975143
K20391	2.48e-05	1.98e-05	4.55e-06	4.26e-06	4.55e-06	2.14e-05	2e-05	1.63e-05	2.92e-05	9.37e-06	1.97e-05	5.67e-06	1.4e-05	0	1.63e-05	0	2.4e-05	1.18e-05	0.260613	0.397043	0.43729
K01870	0.000798453	0.000780183	0.000755466	0.000698508	0.000801041	0.000761377	0.000730619	0.000728895	0.000700531	0.0008101	0.000774032	0.000782806	0.000766112	0.000710391	0.000741332	0.000750041	0.000769327	0.00084063	0.260255	0.396622	-5.66621
K03489	4.96e-06	3.31e-06	0	1.28e-05	1.37e-05	1.28e-05	1e-05	0	1.09e-05	0	0	0	0	6.07e-06	1.22e-05	1.89e-05	0	0	0.259874	0.396164	0.26521
K00230	3.97e-05	5.29e-05	5.01e-05	4.26e-05	2.28e-05	3.85e-05	5.34e-05	3.26e-05	5.11e-05	6.56e-05	4.44e-05	5.11e-05	5.14e-05	4.25e-05	3.26e-05	4.41e-05	6.25e-05	4.14e-05	0.258909	0.394816	-1.24529
K02414	1.49e-05	3.64e-05	4.1e-05	4.26e-05	5.46e-05	5.13e-05	5.67e-05	4.35e-05	5.84e-05	2.81e-05	1.97e-05	5.67e-05	4.2e-05	2.43e-05	6.92e-05	2.52e-05	3.85e-05	1.78e-05	0.258755	0.394703	0.730469
K00030	0.00022317	0.000158681	0.000177489	0.00016185	0.000168401	0.00019676	0.000186825	0.000201262	0.000178781	0.000149845	0.000197206	0.000119123	0.000191528	0.000200367	0.00017515	0.000207995	0.000144249	0.000130238	0.258742	0.394703	1.81902
K08298	0	9.92e-06	1.37e-05	0	0	0	6.67e-06	0	7.3e-06	4.68e-06	0	5.67e-06	9.34e-06	6.07e-06	8.15e-06	6.3e-06	4.81e-06	1.78e-05	0.258729	0.394703	-0.314172
K02532	1.49e-05	9.92e-06	0	8.52e-06	4.55e-06	8.55e-06	1.33e-05	5.44e-06	1.09e-05	0	4.93e-06	0	9.34e-06	6.07e-06	1.22e-05	6.3e-06	9.62e-06	5.92e-06	0.258487	0.394665	0.475061
K17716	0.000327316	0.000307445	0.000300366	0.000255552	0.000300391	0.000290863	0.000240203	0.000244778	0.000280942	0.000285642	0.00034511	0.000311988	0.00029897	0.000255012	0.000329934	0.000214297	0.000331772	0.000378875	0.25835	0.394578	-2.05645
K08372	9.92e-06	6.61e-06	1.37e-05	8.52e-06	4.55e-06	0	6.67e-06	0	3.65e-06	4.68e-06	9.86e-06	0	4.67e-06	0	4.07e-06	0	4.81e-06	5.92e-06	0.258114	0.394341	0.353639
K06403	0.000188455	0.00015207	0.000159285	0.000178886	0.000177503	0.000222425	0.000176816	0.000195822	0.000189727	0.00014048	0.000123253	0.00013614	0.000214885	9.11e-05	0.000293274	0.000100846	0.00019714	9.47e-05	0.257916	0.394162	0.964003
K15551	4.96e-06	3.31e-06	4.55e-06	0	4.55e-06	0	6.67e-06	0	1.46e-05	0	0	0	9.34e-06	0	8.15e-06	0	0	0	0.257492	0.393636	0.210552
K02340	0.00105138	0.000905806	0.000987567	0.000911468	0.000942134	0.00093675	0.00087741	0.000886641	0.000890258	0.00098804	0.000981098	0.000930291	0.000985668	0.000935045	0.000940922	0.000939127	0.000903959	0.00102415	0.257475	0.393636	-5.65221
K03617	0.000758778	0.000899194	0.000760017	0.000830544	0.00076463	0.000829815	0.000837376	0.000864883	0.000791745	0.000880339	0.000828264	0.000913273	0.000882897	0.000716463	0.000936848	0.00072483	0.00095685	0.00084655	0.257287	0.393568	-3.41476
K01053	0	0	0	0	0	0	3.34e-06	5.44e-06	0	0	0	1.13e-05	0	0	0	0	4.81e-06	1.18e-05	0.257266	0.393568	-0.1523
K03739	4.96e-06	9.92e-06	4.55e-06	8.52e-06	4.55e-06	4.28e-06	1e-05	5.44e-06	7.3e-06	9.37e-06	9.86e-06	1.7e-05	4.67e-06	6.07e-06	1.22e-05	6.3e-06	4.81e-06	5.92e-06	0.25677	0.393024	-0.647419
K03430	9.92e-06	1.65e-05	3.19e-05	1.28e-05	1.82e-05	4.28e-06	1.67e-05	4.35e-05	2.19e-05	1.87e-05	2.47e-05	2.84e-05	1.4e-05	4.25e-05	2.04e-05	5.04e-05	1.92e-05	1.78e-05	0.256237	0.39233	-0.543651
K20859	0	3.31e-06	4.55e-06	4.26e-06	0	4.28e-06	0	1.09e-05	7.3e-06	0	0	1.13e-05	4.67e-06	1.21e-05	8.15e-06	1.89e-05	0	5.92e-06	0.256027	0.392132	-0.28868
K03049	4.96e-06	9.92e-06	4.55e-06	4.26e-06	4.55e-06	8.55e-06	1e-05	1.09e-05	7.3e-06	9.37e-06	9.86e-06	1.13e-05	4.67e-06	1.21e-05	4.07e-06	1.26e-05	4.81e-06	1.18e-05	0.255939	0.39212	-0.74545
K21757	1.49e-05	3.31e-06	1.37e-05	1.28e-05	1.82e-05	4.28e-06	6.67e-06	1.09e-05	7.3e-06	2.34e-05	1.48e-05	5.67e-06	9.34e-06	1.82e-05	2.04e-05	1.26e-05	4.81e-06	1.18e-05	0.255577	0.391687	-0.588263
K22044	9.42e-05	9.26e-05	0.000118326	9.8e-05	0.00010013	0.00011549	7.34e-05	0.000103351	9.85e-05	8.43e-05	8.38e-05	0.000102105	6.54e-05	0.000115363	7.33e-05	0.000126057	3.37e-05	0.000100639	0.255564	0.391687	1.22761
K02343	0.000957151	0.000975229	0.000996669	0.000983875	0.00102861	0.000941028	0.000967486	0.000875762	0.000959581	0.00098804	0.00100575	0.00101538	0.000971654	0.00091683	0.00101831	0.000983247	0.000952042	0.00103007	0.2555	0.391687	-7.17058
K13652	2.98e-05	6.61e-06	5.46e-05	5.54e-05	3.64e-05	1.28e-05	3.34e-05	4.9e-05	3.65e-05	1.87e-05	1.48e-05	3.4e-05	2.8e-05	3.04e-05	3.67e-05	3.78e-05	2.88e-05	1.78e-05	0.254898	0.391015	0.666815
K08264	4.96e-06	9.92e-06	4.55e-06	4.26e-06	9.1e-06	8.55e-06	1e-05	1.09e-05	1.09e-05	4.68e-06	9.86e-06	1.13e-05	4.67e-06	2.43e-05	4.07e-06	1.89e-05	9.62e-06	1.18e-05	0.254578	0.390646	-0.530871
K19586	0	6.61e-06	0	0	4.55e-06	0	3.34e-06	1.09e-05	0	4.68e-06	4.93e-06	5.67e-06	4.67e-06	1.21e-05	0	6.3e-06	0	5.92e-06	0.254155	0.390119	-0.296888
K06910	6.94e-05	7.27e-05	5.92e-05	6.81e-05	6.83e-05	5.13e-05	7.01e-05	5.44e-05	5.11e-05	5.15e-05	3.94e-05	6.81e-05	5.14e-05	7.29e-05	3.67e-05	8.82e-05	2.88e-05	5.33e-05	0.253053	0.388548	1.14677
K00197	9.92e-05	6.61e-05	0.000100122	8.94e-05	5.92e-05	6.42e-05	6.67e-05	7.62e-05	5.47e-05	0.000103018	8.87e-05	7.94e-05	7.94e-05	7.89e-05	8.15e-05	5.67e-05	9.62e-05	8.88e-05	0.25289	0.388421	-1.50335
K21579	0	6.61e-06	0	8.52e-06	0	8.55e-06	6.67e-06	1.09e-05	7.3e-06	4.68e-06	4.93e-06	1.7e-05	2.34e-05	6.07e-06	4.07e-06	6.3e-06	4.81e-06	5.92e-06	0.252177	0.387446	-0.355964
K03410	9.42e-05	8.26e-05	7.28e-05	0.000136294	0.000154747	0.000183928	0.000133446	0.000157746	0.000142295	8.9e-05	9.37e-05	0.000107778	0.000107442	7.89e-05	0.000203663	8.19e-05	0.000120207	8.29e-05	0.251609	0.386695	0.895916
K17758	0.000629835	0.000621502	0.000678099	0.000613324	0.000650846	0.000650164	0.000630534	0.0006745	0.000609316	0.000632159	0.000571896	0.000601285	0.000611955	0.000661817	0.0007006	0.000611378	0.000634695	0.000544633	0.251584	0.386695	4.90381
K07642	0	0	0	4.26e-06	0	0	3.34e-06	0	3.65e-06	4.68e-06	9.86e-06	5.67e-06	0	0	0	0	0	5.92e-06	0.251461	0.386695	-0.204212
K08659	4.46e-05	3.64e-05	4.1e-05	2.56e-05	5.01e-05	8.55e-06	3.67e-05	3.81e-05	4.01e-05	2.81e-05	1.97e-05	3.97e-05	4.67e-06	4.25e-05	1.63e-05	1.89e-05	2.88e-05	5.33e-05	0.251182	0.386404	0.674216
K21688	0	0	4.55e-06	0	4.55e-06	4.28e-06	6.67e-06	5.44e-06	3.65e-06	0	0	0	9.34e-06	0	0	0	4.81e-06	0	0.251179	0.386404	0.235032
K06981	4.96e-06	9.92e-06	9.1e-06	4.26e-06	4.55e-06	8.55e-06	6.67e-06	1.09e-05	7.3e-06	4.68e-06	9.86e-06	1.7e-05	4.67e-06	1.21e-05	4.07e-06	1.26e-05	4.81e-06	1.78e-05	0.251045	0.386404	-0.585765
K07043	0.000753819	0.000723984	0.000823731	0.000698508	0.000801041	0.000705771	0.000757308	0.000723455	0.000722422	0.000777321	0.000724731	0.0006807	0.000747426	0.000716463	0.000643574	0.000737435	0.000644311	0.00079327	0.250789	0.386162	4.38691
K00588	9.92e-06	9.92e-06	2.28e-05	0	0	4.28e-06	3.34e-06	0	0	0	0	0	0	6.07e-06	0	1.26e-05	0	0	0.249923	0.38495	0.178486
K02885	9.92e-06	1.65e-05	1.37e-05	4.26e-06	1.82e-05	1.28e-05	2e-05	2.18e-05	1.46e-05	1.87e-05	1.48e-05	2.27e-05	9.34e-06	3.04e-05	8.15e-06	2.52e-05	9.62e-06	2.96e-05	0.249819	0.384911	-0.669034
K00892	0	0	4.55e-06	0	0	4.28e-06	0	0	0	4.68e-06	0	5.67e-06	0	0	0	0	4.81e-06	5.92e-06	0.249037	0.383828	-0.200439
K01959	0	3.31e-06	9.1e-06	4.26e-06	4.55e-06	0	1e-05	0	3.65e-06	9.37e-06	0	5.67e-06	4.67e-06	6.07e-06	4.07e-06	6.3e-06	4.81e-06	1.18e-05	0.248995	0.383828	-0.402178
K01770	0.00089268	0.000833077	0.000891996	0.000864617	0.000832901	0.000919641	0.000860729	0.00089208	0.000864717	0.000880339	0.000941657	0.000856548	0.000920268	0.000862184	0.000977581	0.00090131	0.00100974	0.00077551	0.24866	0.383488	-4.81713
K00073	9.92e-06	9.92e-06	9.1e-06	1.7e-05	1.37e-05	8.55e-06	1.33e-05	5.44e-06	1.46e-05	4.68e-06	1.48e-05	1.13e-05	1.4e-05	1.82e-05	2.04e-05	1.89e-05	9.62e-06	1.18e-05	0.248446	0.383279	-0.835988
K13888	3.97e-05	3.31e-05	1.82e-05	2.98e-05	1.37e-05	5.13e-05	2.67e-05	2.18e-05	2.19e-05	1.4e-05	2.47e-05	3.4e-05	2.34e-05	3.04e-05	1.22e-05	3.15e-05	9.62e-06	2.37e-05	0.247439	0.381846	0.721038
K01338	0.000823249	0.00086283	0.000882894	0.000864617	0.000882966	0.000846925	0.000900763	0.000973673	0.000926743	0.000913118	0.000867705	0.000947308	0.00089224	0.000843969	0.000932775	0.000876098	0.000942425	0.000970868	0.247168	0.381548	-6.02199
K09765	0.000882761	0.000905806	0.000882894	0.000873136	0.000942134	0.000919641	0.000890754	0.000750653	0.000893906	0.000959945	0.000986028	0.000941636	0.000934283	0.000862184	0.000835017	0.000920218	0.000831835	0.000953108	0.245658	0.379336	-4.76125
K07317	3.47e-05	6.28e-05	6.83e-05	7.67e-05	7.74e-05	7.7e-05	5.67e-05	5.98e-05	5.11e-05	6.56e-05	5.92e-05	6.81e-05	7.94e-05	9.71e-05	6.52e-05	6.93e-05	5.29e-05	7.7e-05	0.245469	0.379164	-1.44016
K16924	0.000119024	7.93e-05	0.000104673	0.000132035	0.00010013	8.98e-05	0.000123438	0.000141427	0.000134998	9.83e-05	9.37e-05	9.08e-05	8.41e-05	8.5e-05	0.000158857	6.93e-05	0.000129824	8.88e-05	0.245422	0.379164	1.27024
K02452	0	0	4.55e-06	0	0	0	0	0	0	4.68e-06	0	0	0	0	0	0	4.81e-06	5.92e-06	0.245419	0.379164	-0.153108
K02173	1.49e-05	1.32e-05	4.55e-06	8.52e-06	1.37e-05	1.28e-05	1.33e-05	1.09e-05	1.82e-05	9.37e-06	3.45e-05	1.7e-05	0	3.64e-05	4.07e-06	5.67e-05	0	2.37e-05	0.245191	0.379094	-0.339492
K11617	4.96e-06	3.31e-06	0	8.52e-06	4.55e-06	0	3.34e-06	0	3.65e-06	4.68e-06	0	0	0	0	4.07e-06	0	0	5.92e-06	0.244783	0.378582	0.262908
K03979	0.000922436	0.00100168	0.000996669	0.000890172	0.00099675	0.000958137	0.000947469	0.00089208	0.00098877	0.00100677	0.000986028	0.000958653	0.000976325	0.00098969	0.000883896	0.000995853	0.000995317	0.00101823	0.244589	0.378402	-6.71644
K15778	0.000104146	0.000102482	0.000154734	9.8e-05	0.000109233	9.41e-05	0.000103421	8.16e-05	9.85e-05	9.83e-05	0.000103533	7.94e-05	7.01e-05	0.000121434	4.48e-05	0.000138663	6.73e-05	9.47e-05	0.24392	0.377486	1.15545
K06404	0.000188455	0.000138846	0.000145632	0.000174627	0.000172952	0.000222425	0.000163472	0.000217581	0.00018243	0.000135797	0.000123253	0.000124795	0.000219556	9.71e-05	0.000281054	6.93e-05	0.00019714	8.29e-05	0.243691	0.377251	0.894332
K18359	0	0	0	0	0	4.28e-06	0	0	0	0	0	0	4.67e-06	6.07e-06	4.07e-06	0	0	0	0.243224	0.376647	-0.152374
K00332	6.94e-05	3.64e-05	4.1e-05	4.26e-05	3.19e-05	4.28e-05	7.34e-05	2.18e-05	5.47e-05	1.4e-05	2.96e-05	3.4e-05	3.27e-05	6.07e-05	2.04e-05	6.3e-05	2.4e-05	4.74e-05	0.242433	0.37554	0.707252
K01076	4.96e-06	1.32e-05	1.37e-05	8.52e-06	9.1e-06	4.28e-06	3.34e-06	5.44e-06	3.65e-06	9.37e-06	9.86e-06	1.13e-05	4.67e-06	3.64e-05	4.07e-06	1.26e-05	4.81e-06	1.18e-05	0.242282	0.375426	-0.373052
K01297	0.000342194	0.00024794	0.000263958	0.000238515	0.000245774	0.000248089	0.000280237	0.000201262	0.000244456	0.000224768	0.000251437	0.0002269	0.000252256	0.000267156	0.000199589	0.000283629	0.000201948	0.000230877	0.2417	0.374642	2.16504
K02200	1.98e-05	1.32e-05	1.82e-05	1.7e-05	1.82e-05	1.71e-05	1.33e-05	2.18e-05	2.19e-05	1.87e-05	9.86e-06	0	1.87e-05	1.82e-05	1.63e-05	2.52e-05	1.92e-05	0	0.241461	0.37439	0.706659
K22424	4.96e-06	9.92e-06	9.1e-06	8.52e-06	1.82e-05	2.57e-05	0	1.63e-05	3.65e-06	9.37e-06	4.93e-06	0	4.67e-06	1.21e-05	4.07e-06	1.26e-05	9.62e-06	5.92e-06	0.241124	0.373987	0.409183
K01208	4.46e-05	9.26e-05	0.000104673	6.81e-05	0.00010013	5.99e-05	9.67e-05	7.07e-05	0.000102161	8.9e-05	0.000103533	0.000102105	6.54e-05	0.000109291	8.55e-05	9.45e-05	0.000100974	8.29e-05	0.240506	0.373147	-1.42737
K12268	4.96e-06	3.31e-06	0	4.26e-06	4.55e-06	1.28e-05	6.67e-06	0	3.65e-06	0	0	0	1.4e-05	0	4.07e-06	0	0	0	0.240379	0.373068	0.22388
K17315	0	3.31e-06	4.55e-06	4.26e-06	1.37e-05	4.28e-06	6.67e-06	0	7.3e-06	4.68e-06	9.86e-06	5.67e-06	9.34e-06	6.07e-06	8.15e-06	6.3e-06	4.81e-06	5.92e-06	0.239538	0.37188	-0.534803
K02944	4.96e-06	9.92e-06	4.55e-06	4.26e-06	4.55e-06	8.55e-06	1e-05	1.09e-05	1.09e-05	4.68e-06	9.86e-06	1.7e-05	4.67e-06	1.21e-05	4.07e-06	1.89e-05	4.81e-06	1.78e-05	0.23949	0.37188	-0.548026
K03264	4.96e-06	1.32e-05	9.1e-06	8.52e-06	4.55e-06	8.55e-06	1e-05	1.63e-05	7.3e-06	9.37e-06	1.48e-05	1.7e-05	4.67e-06	1.82e-05	4.07e-06	1.89e-05	4.81e-06	1.78e-05	0.239485	0.37188	-0.604017
K02671	4.96e-06	0	0	0	0	0	0	0	3.65e-06	4.68e-06	0	5.67e-06	0	0	0	0	4.81e-06	5.92e-06	0.239367	0.37188	-0.203275
K11533	4.96e-06	0	0	0	0	0	0	0	3.65e-06	4.68e-06	0	5.67e-06	0	0	0	0	4.81e-06	5.92e-06	0.239367	0.37188	-0.203275
K20814	4.96e-06	0	0	0	0	0	0	0	3.65e-06	4.68e-06	0	5.67e-06	0	0	0	0	4.81e-06	5.92e-06	0.239367	0.37188	-0.203275
K22311	4.96e-06	0	0	0	0	0	0	0	3.65e-06	4.68e-06	0	5.67e-06	0	0	0	0	4.81e-06	5.92e-06	0.239367	0.37188	-0.203275
K01684	6.45e-05	0.000105788	9.56e-05	9.8e-05	0.000150195	0.000102658	0.000103421	0.00010879	0.000124052	9.83e-05	7.89e-05	0.00011345	0.000144814	0.000109291	0.000146637	0.000119754	0.000187523	0.000100639	0.23929	0.37188	-1.19802
K06331	9.92e-06	3.31e-06	1.37e-05	2.56e-05	2.73e-05	2.14e-05	1e-05	2.72e-05	1.82e-05	4.68e-06	0	1.13e-05	2.8e-05	1.21e-05	2.85e-05	1.26e-05	9.62e-06	0	0.239256	0.37188	0.451555
K01925	0.000937314	0.000965312	0.000891996	0.000873136	0.00099675	0.00095386	0.000880746	0.000870322	0.000875663	0.000941214	0.000892355	0.000981343	0.000952968	0.000947188	0.000859456	0.00100846	0.000928001	0.000976788	0.239029	0.37188	-5.89506
K11902	4.96e-06	3.31e-06	4.55e-06	8.52e-06	9.1e-06	4.28e-06	0	0	3.65e-06	0	0	0	0	6.07e-06	4.07e-06	6.3e-06	0	5.92e-06	0.239015	0.37188	0.32432
K16264	8.93e-05	7.27e-05	7.74e-05	4.26e-05	3.19e-05	5.56e-05	6.34e-05	4.9e-05	7.66e-05	6.09e-05	3.94e-05	6.81e-05	4.2e-05	6.07e-05	2.04e-05	6.93e-05	2.88e-05	7.1e-05	0.237946	0.370702	0.893894
K10896	4.96e-06	1.32e-05	4.55e-06	4.26e-06	4.55e-06	4.28e-06	6.67e-06	1.09e-05	7.3e-06	4.68e-06	9.86e-06	1.7e-05	4.67e-06	1.21e-05	4.07e-06	1.26e-05	4.81e-06	1.18e-05	0.237839	0.370653	-0.584201
K03748	4.46e-05	2.31e-05	4.1e-05	3.41e-05	3.64e-05	3.85e-05	3e-05	2.72e-05	3.28e-05	1.4e-05	1.97e-05	1.7e-05	4.2e-05	4.25e-05	2.44e-05	5.04e-05	1.92e-05	2.37e-05	0.237471	0.370198	0.880166
K22043	0	9.92e-06	9.1e-06	4.26e-06	1.37e-05	1.28e-05	6.67e-06	1.09e-05	7.3e-06	4.68e-06	9.86e-06	5.67e-06	9.34e-06	0	0	0	9.62e-06	1.18e-05	0.2368	0.369268	0.457675
K06970	0	3.31e-06	9.1e-06	0	0	0	0	0	0	0	4.93e-06	5.67e-06	0	1.21e-05	0	0	0	1.18e-05	0.236326	0.368647	-0.183565
K18888	0	0	0	0	4.55e-06	0	0	0	0	0	0	0	4.67e-06	0	4.07e-06	0	9.62e-06	0	0.236102	0.368415	-0.143531
K01051	0.000203333	0.000175211	0.000172938	0.00015759	0.000209363	0.000188206	0.000180153	0.000239339	0.000175133	0.000107701	0.000157764	0.000170175	0.000186857	0.000182152	0.000256615	0.000189086	0.000115399	0.000147998	0.2361	0.368415	1.48339
K03573	4.46e-05	9.92e-06	2.73e-05	8.52e-06	4.55e-06	2.14e-05	2.34e-05	2.18e-05	2.55e-05	9.37e-06	9.86e-06	2.27e-05	1.87e-05	1.82e-05	1.63e-05	2.52e-05	9.62e-06	5.92e-06	0.235762	0.36812	0.547193
K18903	0	0	9.1e-06	0	0	0	0	5.44e-06	7.3e-06	0	0	0	0	6.07e-06	0	0	0	0	0.235446	0.367743	0.153534
K01239	3.97e-05	3.97e-05	5.46e-05	3.83e-05	3.19e-05	4.71e-05	5.34e-05	4.9e-05	4.74e-05	1.87e-05	1.97e-05	3.97e-05	4.67e-05	6.07e-05	3.67e-05	4.41e-05	4.33e-05	3.55e-05	0.235353	0.367715	1.1564
K03657	0.00143325	0.00135871	0.00127883	0.0014609	0.0016749	0.00138588	0.00141453	0.00128373	0.00144849	0.00131114	0.00134593	0.00138409	0.00134537	0.00139649	0.00142564	0.00130469	0.00125977	0.00146814	0.234993	0.36727	4.36008
K06863	9.92e-06	1.65e-05	1.37e-05	8.52e-06	9.1e-06	1.28e-05	1.33e-05	2.18e-05	1.46e-05	9.37e-06	1.97e-05	2.27e-05	9.34e-06	2.43e-05	8.15e-06	2.52e-05	9.62e-06	2.37e-05	0.234822	0.367121	-0.743855
K11074	4.96e-06	3.31e-06	9.1e-06	8.52e-06	4.55e-06	8.55e-06	0	5.44e-06	0	0	0	5.67e-06	0	6.07e-06	8.15e-06	6.3e-06	0	0	0.234683	0.367021	0.336923
K06982	4.96e-06	9.92e-06	4.55e-06	4.26e-06	4.55e-06	8.55e-06	1e-05	1.09e-05	7.3e-06	4.68e-06	9.86e-06	1.7e-05	4.67e-06	1.21e-05	4.07e-06	1.26e-05	4.81e-06	1.78e-05	0.234654	0.367021	-0.587583
K01933	0.000763737	0.000740513	0.000723609	0.000762396	0.00076463	0.00082126	0.000723946	0.000815927	0.000715125	0.00066962	0.000680359	0.000686373	0.000822169	0.000625387	0.00085131	0.000680709	0.000831835	0.000615672	0.234401	0.366814	3.14992
K04066	0.00081829	0.000809936	0.000800976	0.000800729	0.000846555	0.000829815	0.000767316	0.000761532	0.000751611	0.000838195	0.000828264	0.000828186	0.00085954	0.000801467	0.000773918	0.00081307	0.000750094	0.000893909	0.234333	0.366814	-6.35382
K15910	0	0	0	4.26e-06	4.55e-06	0	0	0	0	4.68e-06	0	0	0	6.07e-06	0	6.3e-06	4.81e-06	0	0.233424	0.365519	-0.205572
K06968	1.49e-05	2.31e-05	2.28e-05	2.13e-05	1.37e-05	8.55e-06	2.67e-05	2.18e-05	2.55e-05	1.4e-05	3.45e-05	2.84e-05	1.4e-05	4.86e-05	8.15e-06	5.04e-05	9.62e-06	3.55e-05	0.233314	0.365463	-0.569069
K02863	0.00109105	0.00110085	0.000987567	0.0010648	0.00111964	0.00107363	0.00107424	0.00103351	0.00117485	0.00109574	0.00119309	0.00108345	0.0011118	0.00117791	0.00103053	0.00111561	0.00100974	0.0012491	0.233191	0.365388	-4.9948
K06993	0.000138861	0.000132234	9.56e-05	0.000149072	0.000154747	0.000188206	0.000140119	0.000146867	0.000138647	0.000112384	7.89e-05	8.51e-05	0.000163499	8.5e-05	0.000219956	9.45e-05	0.000163482	7.1e-05	0.233092	0.365349	0.981089
K10800	0	0	4.55e-06	4.26e-06	4.55e-06	0	3.34e-06	0	3.65e-06	0	4.93e-06	5.67e-06	0	6.07e-06	0	6.3e-06	4.81e-06	5.92e-06	0.232788	0.36499	-0.355062
K04782	0	0	0	4.26e-06	4.55e-06	4.28e-06	6.67e-06	0	7.3e-06	0	0	0	4.67e-06	1.82e-05	4.07e-06	1.89e-05	4.81e-06	5.92e-06	0.23267	0.364921	-0.248652
K05349	0.00164154	0.00134879	0.00142901	0.00166535	0.00161119	0.00148853	0.0014579	0.00164817	0.00146309	0.00128305	0.00131635	0.00131602	0.00169105	0.0012022	0.00189406	0.00117864	0.00165405	0.00112479	0.232586	0.364907	2.12038
K02979	4.96e-06	9.92e-06	9.1e-06	4.26e-06	9.1e-06	8.55e-06	1.33e-05	1.09e-05	1.09e-05	4.68e-06	9.86e-06	2.27e-05	9.34e-06	1.21e-05	4.07e-06	1.89e-05	4.81e-06	2.96e-05	0.232549	0.364907	-0.493237
K01589	1.49e-05	1.32e-05	1.37e-05	1.28e-05	2.28e-05	1.71e-05	1.67e-05	2.18e-05	7.3e-06	4.68e-06	4.93e-06	1.13e-05	1.4e-05	2.43e-05	1.22e-05	1.26e-05	9.62e-06	1.78e-05	0.231106	0.362817	0.769955
K04755	9.92e-06	1.65e-05	9.1e-06	2.13e-05	9.1e-06	8.55e-06	1e-05	1.09e-05	7.3e-06	4.68e-06	4.93e-06	5.67e-06	9.34e-06	1.82e-05	8.15e-06	1.26e-05	9.62e-06	5.92e-06	0.230949	0.362688	0.681751
K00135	1.98e-05	1.32e-05	2.28e-05	1.7e-05	1.82e-05	1.71e-05	1e-05	5.44e-06	1.82e-05	1.4e-05	1.97e-05	1.7e-05	9.34e-06	3.04e-05	1.63e-05	3.15e-05	1.92e-05	1.78e-05	0.23091	0.362688	-0.836204
K01069	3.47e-05	1.98e-05	2.28e-05	2.13e-05	1.82e-05	1.28e-05	1.67e-05	1.09e-05	2.55e-05	2.34e-05	1.48e-05	1.13e-05	1.87e-05	3.04e-05	8.15e-06	1.26e-05	1.44e-05	1.18e-05	0.23063	0.362419	0.78175
K06917	0	6.61e-06	0	4.26e-06	0	0	6.67e-06	1.63e-05	3.65e-06	9.37e-06	0	5.67e-06	9.34e-06	6.07e-06	8.15e-06	6.3e-06	9.62e-06	5.92e-06	0.230297	0.362012	-0.378048
K00886	9.92e-06	6.61e-06	1.37e-05	0	0	4.28e-06	3.34e-06	5.44e-06	1.09e-05	4.68e-06	0	5.67e-06	0	6.07e-06	0	6.3e-06	4.81e-06	5.92e-06	0.230292	0.362012	0.374384
K15895	0	3.31e-06	4.55e-06	0	0	0	0	0	0	4.68e-06	0	0	0	0	4.07e-06	6.3e-06	4.81e-06	0	0.230204	0.362012	-0.204735
K03547	0.000664551	0.000700843	0.000732711	0.000762396	0.000691808	0.000752822	0.000687249	0.000810487	0.000722422	0.000735177	0.000798683	0.00074877	0.000742755	0.000692176	0.000900189	0.000636589	0.000783752	0.00081695	0.230186	0.362012	-3.5966
K07777	3.97e-05	4.63e-05	5.92e-05	5.54e-05	6.83e-05	0.00011549	6.67e-05	6.53e-05	8.03e-05	4.21e-05	6.9e-05	5.11e-05	5.61e-05	3.64e-05	8.96e-05	3.78e-05	5.77e-05	5.33e-05	0.230019	0.362012	0.933111
K17250	4.96e-06	0	0	4.26e-06	4.55e-06	0	0	0	3.65e-06	4.68e-06	0	0	4.67e-06	6.07e-06	4.07e-06	6.3e-06	4.81e-06	0	0.229591	0.361483	-0.323725
K11179	9.92e-06	1.32e-05	1.37e-05	0	0	4.28e-06	3.34e-06	2.18e-05	3.65e-06	9.37e-06	0	0	4.67e-06	0	1.22e-05	6.3e-06	4.81e-06	0	0.229104	0.360831	0.293411
K06152	0	6.61e-06	0	4.26e-06	4.55e-06	4.28e-06	3.34e-06	5.44e-06	3.65e-06	4.68e-06	4.93e-06	5.67e-06	0	1.21e-05	0	1.26e-05	4.81e-06	5.92e-06	0.229075	0.360831	-0.396992
K02790	9.92e-06	1.32e-05	1.82e-05	1.28e-05	2.28e-05	1.28e-05	1e-05	0	7.3e-06	4.68e-06	0	5.67e-06	9.34e-06	6.07e-06	2.44e-05	6.3e-06	9.62e-06	5.92e-06	0.229018	0.360831	0.455276
K02791	9.92e-06	1.32e-05	1.82e-05	1.28e-05	2.28e-05	1.28e-05	1e-05	0	7.3e-06	4.68e-06	0	5.67e-06	9.34e-06	6.07e-06	2.44e-05	6.3e-06	9.62e-06	5.92e-06	0.229018	0.360831	0.455276
K14205	0	1.32e-05	4.55e-06	4.26e-06	2.28e-05	8.55e-06	3.34e-06	0	7.3e-06	4.68e-06	0	5.67e-06	0	0	0	0	9.62e-06	1.18e-05	0.228562	0.360441	0.265138
K09692	0.000203333	0.000178517	0.000150183	0.000229997	0.00023212	0.000248089	0.000206842	0.00022846	0.000200673	0.000154528	0.000128184	0.000175848	0.000191528	0.000109291	0.00033808	0.000119754	0.000240415	0.000118399	0.228241	0.360052	1.02129
K01735	0.000848046	0.000846301	0.00086469	0.000856099	0.000810144	0.00083837	0.000830703	0.000864883	0.000850123	0.000875657	0.000867705	0.000822513	0.000887568	0.000807539	0.000928702	0.000825675	0.000908767	0.000852469	0.227877	0.359593	-8.2322
K00856	0	6.61e-06	0	0	0	4.28e-06	0	5.44e-06	0	4.68e-06	0	0	4.67e-06	6.07e-06	8.15e-06	1.26e-05	0	0	0.227702	0.359432	-0.236947
K04795	4.96e-06	1.32e-05	1.37e-05	4.26e-06	9.1e-06	1.28e-05	1e-05	1.09e-05	1.09e-05	1.4e-05	9.86e-06	1.13e-05	4.67e-06	1.82e-05	4.07e-06	1.26e-05	1.92e-05	2.37e-05	0.227492	0.359217	-0.669153
K02111	0.000600079	0.000604973	0.000568875	0.000664435	0.000673603	0.000615945	0.000570483	0.000630983	0.000620261	0.000543188	0.000547246	0.000578595	0.000611955	0.000588957	0.0007006	0.000617681	0.000615462	0.000467674	0.227216	0.358897	3.48888
K10831	4.96e-06	6.61e-06	0	0	9.1e-06	0	6.67e-06	5.44e-06	7.3e-06	4.68e-06	0	0	4.67e-06	0	8.15e-06	0	4.81e-06	0	0.227178	0.358897	0.31506
K04752	9.92e-06	1.98e-05	3.19e-05	1.7e-05	1.37e-05	4.28e-06	2.34e-05	1.63e-05	2.92e-05	9.37e-06	9.86e-06	5.67e-06	1.4e-05	2.43e-05	1.22e-05	3.15e-05	4.81e-06	5.92e-06	0.227129	0.358897	0.530856
K00010	8.43e-05	8.26e-05	0.000131979	6.81e-05	4.1e-05	6.42e-05	8.34e-05	8.16e-05	5.11e-05	6.56e-05	0.000103533	0.000107778	8.88e-05	9.71e-05	0.000114051	5.67e-05	7.69e-05	0.000100639	0.227023	0.358897	-1.09617
K02244	1.49e-05	3.31e-06	4.55e-06	4.26e-06	9.1e-06	4.28e-06	3.34e-06	5.44e-06	7.3e-06	0	0	0	1.4e-05	0	8.15e-06	0	4.81e-06	5.92e-06	0.226578	0.358352	0.340618
K21011	2.98e-05	2.31e-05	3.64e-05	5.11e-05	8.19e-05	7.27e-05	3.34e-05	3.81e-05	4.74e-05	1.87e-05	1.97e-05	4.54e-05	6.07e-05	1.82e-05	6.92e-05	2.52e-05	2.88e-05	2.37e-05	0.226402	0.358189	0.62446
K16317	4.96e-06	6.61e-06	4.55e-06	4.26e-06	4.55e-06	4.28e-06	6.67e-06	1.09e-05	7.3e-06	4.68e-06	9.86e-06	5.67e-06	4.67e-06	1.21e-05	4.07e-06	1.26e-05	4.81e-06	1.18e-05	0.225604	0.357042	-0.694075
K21345	4.96e-06	3.31e-06	4.55e-06	8.52e-06	4.55e-06	4.28e-06	3.34e-06	5.44e-06	3.65e-06	4.68e-06	9.86e-06	0	9.34e-06	1.21e-05	8.15e-06	1.26e-05	4.81e-06	0	0.225457	0.356925	-0.496906
K01601	4.96e-06	6.61e-06	4.55e-06	4.26e-06	4.55e-06	4.28e-06	6.67e-06	1.09e-05	7.3e-06	4.68e-06	9.86e-06	1.13e-05	4.67e-06	1.21e-05	4.07e-06	1.26e-05	4.81e-06	5.92e-06	0.225191	0.35662	-0.704744
K06869	4.96e-06	6.61e-06	4.55e-06	4.26e-06	4.55e-06	4.28e-06	6.67e-06	1.09e-05	7.3e-06	4.68e-06	9.86e-06	1.13e-05	4.67e-06	1.21e-05	4.07e-06	1.26e-05	4.81e-06	5.92e-06	0.225191	0.35662	-0.704744
K11624	4.96e-06	3.31e-06	4.55e-06	4.26e-06	4.55e-06	4.28e-06	3.34e-06	0	3.65e-06	4.68e-06	0	5.67e-06	4.67e-06	0	0	0	0	5.92e-06	0.22501	0.356563	0.407575
K03152	0.000808371	0.00076696	0.000755466	0.000787952	0.000773733	0.000851202	0.00076398	0.000788729	0.000791745	0.000725812	0.000754311	0.00065801	0.000845526	0.000637531	0.000949068	0.000642892	0.000802985	0.000645272	0.224849	0.356424	2.91914
K20976	2.98e-05	3.97e-05	4.1e-05	5.11e-05	3.64e-05	3.85e-05	4e-05	3.26e-05	2.92e-05	5.15e-05	2.47e-05	1.13e-05	3.27e-05	6.07e-06	3.26e-05	1.26e-05	7.21e-05	5.92e-06	0.224815	0.356424	0.599712
K22213	0	6.61e-06	0	8.52e-06	0	0	6.67e-06	0	3.65e-06	4.68e-06	4.93e-06	5.67e-06	1.4e-05	6.07e-06	1.63e-05	0	0	0	0.22474	0.356424	-0.266728
K03588	0.00111089	0.00115705	0.00112865	0.00109887	0.00118336	0.00112496	0.00108759	0.00107158	0.0010508	0.00112852	0.00113393	0.0011345	0.00119121	0.00108077	0.00112829	0.00118494	0.00114437	0.00109519	0.224319	0.355929	-8.8342
K09954	4.96e-06	3.31e-06	9.1e-06	8.52e-06	4.55e-06	8.55e-06	3.34e-06	5.44e-06	3.65e-06	4.68e-06	4.93e-06	5.67e-06	0	6.07e-06	0	6.3e-06	4.81e-06	5.92e-06	0.223998	0.355535	0.626095
K22078	0	0	4.55e-06	0	0	0	0	0	0	0	4.93e-06	5.67e-06	0	0	0	0	0	5.92e-06	0.223957	0.355535	-0.16006
K00042	4.46e-05	3.97e-05	3.19e-05	3.83e-05	4.1e-05	3.85e-05	5.67e-05	4.35e-05	5.47e-05	6.09e-05	3.45e-05	5.11e-05	5.61e-05	3.64e-05	5.7e-05	3.15e-05	6.25e-05	5.33e-05	0.223907	0.355535	-1.39134
K18779	4.96e-06	9.92e-06	4.55e-06	4.26e-06	4.55e-06	4.28e-06	1e-05	1.09e-05	7.3e-06	4.68e-06	9.86e-06	1.13e-05	4.67e-06	1.21e-05	4.07e-06	1.26e-05	4.81e-06	1.78e-05	0.223628	0.355294	-0.613381
K07257	1.98e-05	1.98e-05	2.28e-05	2.13e-05	2.28e-05	1.28e-05	2.67e-05	3.26e-05	3.28e-05	1.4e-05	9.86e-06	1.13e-05	2.34e-05	3.04e-05	2.44e-05	2.52e-05	1.92e-05	1.78e-05	0.223252	0.354812	0.984627
K00972	0.000208292	0.000195046	0.000159285	0.000208701	0.000336801	0.000303695	0.000210178	0.000179504	0.000197024	0.000224768	0.000221856	0.00020421	0.000196199	0.000145721	0.000207736	0.000144966	0.000182715	0.000219037	0.223182	0.354812	1.35961
K07712	1.49e-05	9.92e-06	1.82e-05	1.28e-05	1.37e-05	2.14e-05	3.34e-06	1.63e-05	7.3e-06	9.37e-06	4.93e-06	5.67e-06	1.4e-05	1.21e-05	1.63e-05	1.89e-05	4.81e-06	0	0.222491	0.353832	0.587061
K05342	0	1.32e-05	1.37e-05	4.26e-06	4.55e-06	0	6.67e-06	1.63e-05	3.65e-06	1.4e-05	9.86e-06	1.13e-05	4.67e-06	1.21e-05	8.15e-06	1.26e-05	9.62e-06	5.92e-06	0.222456	0.353832	-0.532042
K05979	2.98e-05	6.94e-05	3.64e-05	3.83e-05	2.73e-05	2.57e-05	5.34e-05	3.26e-05	3.28e-05	3.75e-05	4.44e-05	5.11e-05	3.27e-05	6.68e-05	3.26e-05	6.3e-05	3.37e-05	5.92e-05	0.221369	0.352276	-0.935781
K01071	0.000233089	0.000198352	0.000213897	0.00021296	0.000236671	0.000226702	0.000190161	0.000146867	0.000211619	0.00021072	0.000187345	0.00018152	0.000238242	0.000200367	0.000183296	0.000157572	0.000192332	0.000183518	0.220834	0.351538	2.45243
K03471	0.000138861	0.000128929	0.000127428	0.00010648	0.000104682	8.55e-05	0.000120102	8.16e-05	0.000142295	7.96e-05	9.37e-05	0.000119123	8.88e-05	0.000109291	5.3e-05	0.000151269	6.25e-05	0.000130238	0.220385	0.350939	1.19638
K21023	0	0	0	0	4.55e-06	0	0	0	0	4.68e-06	0	0	0	0	0	6.3e-06	0	5.92e-06	0.220269	0.350869	-0.160352
K00031	0.000277723	0.000403315	0.000345876	0.000362032	0.00033225	0.000316527	0.000323607	0.000440601	0.000372157	0.000407391	0.00035497	0.000414093	0.000336342	0.000333945	0.000435838	0.000359263	0.000437555	0.000343356	0.220208	0.350869	-2.44988
K18554	4.96e-06	9.92e-06	4.55e-06	8.52e-06	0	0	3.34e-06	1.09e-05	7.3e-06	0	9.86e-06	1.13e-05	4.67e-06	6.07e-06	8.15e-06	6.3e-06	9.62e-06	1.78e-05	0.220145	0.350869	-0.468931
K19997	4.96e-05	3.31e-05	5.01e-05	2.56e-05	4.55e-05	3.85e-05	4.34e-05	4.35e-05	3.65e-05	1.4e-05	3.94e-05	2.27e-05	3.74e-05	3.64e-05	4.89e-05	5.67e-05	1.92e-05	2.96e-05	0.220022	0.350817	1.00698
K15358	0	0	4.55e-06	4.26e-06	0	4.28e-06	3.34e-06	0	7.3e-06	1.87e-05	1.48e-05	0	4.67e-06	6.07e-06	8.15e-06	0	0	0	0.219899	0.350735	-0.245584
K03480	6.45e-05	4.3e-05	5.46e-05	3.41e-05	4.1e-05	5.13e-05	3.34e-05	7.07e-05	4.74e-05	3.28e-05	1.97e-05	2.27e-05	6.54e-05	1.21e-05	5.3e-05	1.89e-05	8.17e-05	2.96e-05	0.219531	0.350262	0.690228
K03578	2.98e-05	2.31e-05	2.73e-05	2.13e-05	9.1e-06	4.28e-06	2.67e-05	2.18e-05	2.55e-05	1.4e-05	3.94e-05	2.84e-05	9.34e-06	5.46e-05	1.22e-05	3.78e-05	2.4e-05	3.55e-05	0.219315	0.350032	-0.620324
K00207	0	0	4.55e-06	0	0	0	0	0	0	4.68e-06	0	0	0	0	0	0	4.81e-06	1.18e-05	0.219204	0.349969	-0.14314
K00364	2.98e-05	6.61e-06	1.82e-05	1.28e-05	1.82e-05	1.28e-05	2e-05	0	2.19e-05	1.87e-05	1.48e-05	1.13e-05	1.4e-05	3.04e-05	1.22e-05	3.15e-05	2.4e-05	2.96e-05	0.219115	0.349941	-0.656343
K02991	4.96e-06	9.92e-06	4.55e-06	4.26e-06	9.1e-06	8.55e-06	1.33e-05	1.09e-05	1.09e-05	9.37e-06	9.86e-06	2.84e-05	4.67e-06	1.82e-05	4.07e-06	1.26e-05	4.81e-06	1.78e-05	0.219101	0.349941	-0.518165
K00899	4.96e-06	2.98e-05	2.28e-05	8.52e-06	9.1e-06	8.55e-06	1.33e-05	0	2.55e-05	2.34e-05	4.93e-06	2.84e-05	1.87e-05	6.07e-06	3.26e-05	1.89e-05	1.44e-05	2.96e-05	0.21848	0.349155	-0.511453
K12240	0	0	4.55e-06	0	0	0	0	0	0	0	0	0	4.67e-06	6.07e-06	0	6.3e-06	0	0	0.218399	0.349139	-0.160827
K19092	9.92e-06	9.92e-06	1.82e-05	8.52e-06	1.37e-05	2.99e-05	2.34e-05	1.63e-05	3.28e-05	1.4e-05	9.86e-06	1.7e-05	1.4e-05	1.82e-05	4.07e-06	1.89e-05	9.62e-06	1.78e-05	0.217954	0.348541	0.680148
K01486	0.000138861	0.000148764	0.000168387	0.000153331	0.00013199	0.000149709	0.000186825	0.000184943	0.000171484	0.000173258	0.000167625	0.000238245	0.000168171	0.000194295	0.000105905	0.000201692	0.000144249	0.000207197	0.217453	0.347854	-1.70416
K15461	4.96e-06	3.31e-06	4.55e-06	8.52e-06	9.1e-06	4.28e-06	3.34e-06	5.44e-06	7.3e-06	4.68e-06	0	0	4.67e-06	6.07e-06	4.07e-06	6.3e-06	9.62e-06	0	0.216765	0.346867	0.524714
K02494	4.96e-06	3.31e-06	9.1e-06	4.26e-06	4.55e-06	4.28e-06	3.34e-06	5.44e-06	3.65e-06	4.68e-06	0	0	4.67e-06	6.07e-06	4.07e-06	6.3e-06	4.81e-06	0	0.216572	0.346671	0.560567
K02883	4.96e-06	6.61e-06	9.1e-06	4.26e-06	4.55e-06	8.55e-06	1e-05	1.09e-05	1.09e-05	4.68e-06	9.86e-06	1.7e-05	9.34e-06	1.21e-05	4.07e-06	1.26e-05	4.81e-06	1.78e-05	0.216551	0.346671	-0.67751
K19220	0	0	0	0	0	4.28e-06	0	0	0	0	0	0	0	6.07e-06	4.07e-06	6.3e-06	0	0	0.216404	0.346629	-0.159849
K13770	0	0	0	0	0	0	3.34e-06	5.44e-06	0	9.37e-06	4.93e-06	0	0	6.07e-06	4.07e-06	0	0	0	0.21594	0.345998	-0.199387
K00963	0.000233089	0.000304139	0.000282162	0.000276848	0.000236671	0.000226702	0.000313599	0.000271976	0.000284591	0.000248181	0.000246507	0.00029497	0.000242913	0.000285371	0.00017515	0.000283629	0.000177907	0.000266397	0.215331	0.345137	2.09933
K09946	7.93e-05	0.00013554	0.000113775	9.8e-05	8.19e-05	6.42e-05	0.000123438	5.98e-05	0.000131349	0.000126432	0.000128184	0.000124795	8.88e-05	0.000133578	0.000101831	8.19e-05	9.14e-05	0.000159838	0.214678	0.344201	-1.21637
K03442	0.000585201	0.000595055	0.000514263	0.000600547	0.000573473	0.000586003	0.000577155	0.000549391	0.000525398	0.00051041	0.000557106	0.00054456	0.00056057	0.000473594	0.000655794	0.000504229	0.000524104	0.000544633	0.214668	0.344201	4.07427
K17237	0	6.61e-06	4.55e-06	0	0	0	0	0	0	4.68e-06	4.93e-06	0	0	6.07e-06	4.07e-06	0	0	5.92e-06	0.214493	0.344131	-0.240009
K10844	9.92e-06	1.98e-05	1.37e-05	8.52e-06	9.1e-06	2.14e-05	1.33e-05	3.26e-05	2.19e-05	9.37e-06	1.97e-05	1.7e-05	1.4e-05	4.25e-05	8.15e-06	5.04e-05	2.4e-05	2.96e-05	0.213909	0.343307	-0.536495
K01682	4.96e-06	3.31e-06	1.37e-05	8.52e-06	9.1e-06	4.28e-06	1e-05	0	3.65e-06	9.37e-06	0	0	0	6.07e-06	4.07e-06	6.3e-06	4.81e-06	5.92e-06	0.213786	0.343222	0.425174
K03711	0.000719103	0.00061489	0.000668997	0.000664435	0.000705463	0.000731435	0.000650551	0.000728895	0.000645802	0.000632159	0.000621198	0.000584268	0.000677355	0.000661817	0.000786138	0.000630287	0.000687586	0.000520954	0.213586	0.343013	3.45459
K07403	4.46e-05	3.64e-05	2.73e-05	2.56e-05	4.1e-05	3.42e-05	2e-05	3.81e-05	2.19e-05	2.81e-05	2.96e-05	2.84e-05	5.14e-05	4.86e-05	3.67e-05	5.67e-05	4.33e-05	2.37e-05	0.213459	0.342922	-1.05155
K19126	2.98e-05	3.31e-05	1.82e-05	1.7e-05	4.1e-05	4.28e-05	2e-05	3.81e-05	2.19e-05	3.75e-05	3.45e-05	3.97e-05	1.87e-05	3.04e-05	2.44e-05	4.41e-05	3.85e-05	4.74e-05	0.213333	0.342831	-1.02875
K08281	2.98e-05	4.96e-05	3.64e-05	3.83e-05	4.1e-05	4.28e-05	4.34e-05	4.35e-05	4.74e-05	4.21e-05	4.44e-05	2.84e-05	2.8e-05	4.25e-05	2.44e-05	4.41e-05	3.85e-05	4.14e-05	0.213148	0.342647	1.74821
K13993	0.000441381	0.00051902	0.000486957	0.000408883	0.000418726	0.000359301	0.000447045	0.00044604	0.000456075	0.000491679	0.000586687	0.000550233	0.000378384	0.000613244	0.000256615	0.000705921	0.00036543	0.000639352	0.212866	0.342305	-1.35063
K01308	0.000342194	0.000360339	0.000309468	0.000362032	0.000341353	0.000359301	0.000296918	0.000277415	0.000277293	0.00038866	0.000409202	0.00029497	0.000341013	0.000303586	0.000329934	0.000283629	0.00042313	0.000402555	0.212425	0.34171	-2.32483
K19575	0	3.31e-06	0	0	9.1e-06	0	6.67e-06	0	1.09e-05	0	0	5.67e-06	0	0	0	0	4.81e-06	0	0.212322	0.341656	0.197971
K05739	0	9.92e-06	0	8.52e-06	0	8.55e-06	3.34e-06	5.44e-06	3.65e-06	4.68e-06	9.86e-06	5.67e-06	4.67e-06	1.82e-05	1.22e-05	1.26e-05	0	0	0.211734	0.340822	-0.360609
K09124	2.48e-05	3.31e-05	1.82e-05	3.41e-05	2.73e-05	3.85e-05	2e-05	2.72e-05	2.19e-05	2.34e-05	1.48e-05	1.7e-05	2.8e-05	3.04e-05	2.04e-05	3.15e-05	2.88e-05	1.18e-05	0.211463	0.340497	1.10781
K07058	0.000614957	0.000568608	0.000641691	0.000604806	0.000568921	0.000577449	0.000573819	0.000609225	0.000569181	0.000646207	0.000571896	0.000578595	0.000621298	0.000582885	0.000639501	0.000592469	0.00064912	0.000603833	0.211462	0.340497	-6.58963
K03409	5.46e-05	4.96e-05	5.92e-05	5.11e-05	6.83e-05	7.7e-05	7.01e-05	7.07e-05	7.3e-05	4.21e-05	4.93e-05	5.67e-05	4.2e-05	7.89e-05	8.15e-05	6.93e-05	3.85e-05	3.55e-05	0.21116	0.340233	1.28243
K20532	1.98e-05	2.31e-05	4.1e-05	1.7e-05	2.28e-05	3.85e-05	3e-05	3.81e-05	1.82e-05	1.4e-05	2.96e-05	2.27e-05	9.34e-06	3.64e-05	1.63e-05	3.78e-05	1.44e-05	1.18e-05	0.210784	0.339739	0.753777
K19429	9.92e-06	3.31e-06	1.37e-05	8.52e-06	0	4.28e-06	1e-05	1.09e-05	1.09e-05	4.68e-06	9.86e-06	0	9.34e-06	6.07e-06	8.15e-06	6.3e-06	4.81e-06	0	0.210712	0.339735	0.519609
K03779	5.46e-05	6.28e-05	5.01e-05	8.94e-05	6.37e-05	5.56e-05	5.67e-05	6.53e-05	5.84e-05	6.56e-05	2.96e-05	5.67e-05	7.01e-05	3.04e-05	7.74e-05	1.89e-05	6.73e-05	4.74e-05	0.210648	0.339735	1.05152
K00560	0.000634795	0.000694231	0.000714507	0.000596288	0.000691808	0.000701493	0.000727282	0.000641862	0.000660396	0.000622793	0.000635988	0.000606958	0.000742755	0.000582885	0.000623208	0.000573561	0.000726052	0.000663032	0.21063	0.339735	3.98579
K16199	9.92e-06	6.61e-06	4.55e-06	0	0	8.55e-06	6.67e-06	1.63e-05	3.65e-06	9.37e-06	4.93e-06	1.13e-05	4.67e-06	1.82e-05	1.22e-05	6.3e-06	9.62e-06	5.92e-06	0.210617	0.339735	-0.507763
K03336	5.46e-05	2.98e-05	3.64e-05	2.98e-05	2.73e-05	2.99e-05	3e-05	4.9e-05	1.82e-05	3.28e-05	4.44e-05	3.97e-05	4.2e-05	3.64e-05	5.7e-05	4.41e-05	3.37e-05	2.96e-05	0.210047	0.339109	-1.17047
K06423	5.46e-05	2.98e-05	2.73e-05	5.54e-05	7.74e-05	8.98e-05	4e-05	0	4.38e-05	5.15e-05	3.45e-05	2.84e-05	5.14e-05	2.43e-05	1.22e-05	2.52e-05	2.4e-05	4.74e-05	0.209736	0.338719	0.580134
K02759	8.93e-05	6.94e-05	5.46e-05	5.54e-05	7.28e-05	6.42e-05	5e-05	8.16e-05	6.2e-05	4.21e-05	1.97e-05	1.7e-05	8.41e-05	7.29e-05	9.78e-05	5.04e-05	6.25e-05	2.96e-05	0.209656	0.338702	0.842148
K03555	0.000793493	0.000800019	0.000746364	0.000702768	0.000810144	0.000757099	0.000753972	0.000707137	0.000726071	0.000838195	0.000793753	0.000765788	0.000784797	0.000783252	0.000741332	0.000743738	0.000716436	0.000887989	0.209537	0.338621	-5.17834
K06894	4.96e-05	4.3e-05	5.46e-05	3.83e-05	4.1e-05	2.99e-05	5.34e-05	5.44e-05	2.19e-05	4.68e-05	3.45e-05	6.24e-05	3.74e-05	7.89e-05	2.44e-05	7.56e-05	4.81e-05	6.51e-05	0.209259	0.338283	-0.953402
K01400	0	3.31e-06	0	8.52e-06	9.1e-06	0	1.33e-05	0	0	0	0	5.67e-06	0	0	0	0	0	5.92e-06	0.208556	0.337259	0.196156
K09735	4.96e-06	9.92e-06	4.55e-06	4.26e-06	4.55e-06	8.55e-06	1.33e-05	1.09e-05	7.3e-06	9.37e-06	9.86e-06	1.7e-05	4.67e-06	1.21e-05	4.07e-06	1.26e-05	4.81e-06	1.78e-05	0.208504	0.337259	-0.648859
K07028	9.92e-06	6.61e-06	0	8.52e-06	9.1e-06	8.55e-06	1e-05	0	1.46e-05	4.68e-06	4.93e-06	0	0	6.07e-06	0	1.26e-05	0	1.18e-05	0.208293	0.337055	0.382768
K11906	0	3.31e-06	4.55e-06	0	0	0	0	0	0	4.68e-06	0	0	4.67e-06	0	4.07e-06	0	9.62e-06	0	0.207376	0.335683	-0.198267
K01950	0.000629835	0.000598361	0.000628038	0.000600547	0.000605332	0.000598836	0.000640542	0.000685379	0.000605667	0.000590015	0.000571896	0.000595613	0.000579255	0.000595028	0.000655794	0.000567258	0.000692394	0.000509114	0.207185	0.335485	4.51913
K00938	0	0	4.55e-06	0	4.55e-06	0	0	5.44e-06	0	4.68e-06	4.93e-06	1.13e-05	0	6.07e-06	0	0	0	5.92e-06	0.206737	0.33487	-0.252345
K11910	0	3.31e-06	4.55e-06	0	0	0	0	0	0	4.68e-06	0	0	0	6.07e-06	4.07e-06	6.3e-06	0	0	0.206694	0.33487	-0.21348
K01181	7.44e-05	0.000105788	6.83e-05	0.000127776	0.00010013	0.00011549	0.000100085	4.9e-05	0.000109458	3.75e-05	7.4e-05	7.94e-05	9.34e-05	8.5e-05	0.000122198	9.45e-05	6.73e-05	5.92e-05	0.206363	0.334486	1.10837
K09935	0.000143821	0.000148764	0.000154734	0.000127776	0.000168401	0.000136877	0.000140119	7.62e-05	0.000134998	0.000149845	6.41e-05	0.000107778	7.94e-05	0.000157865	8.96e-05	0.000144966	0.000139441	0.000130238	0.206149	0.33425	1.33374
K11904	4.96e-06	3.31e-06	0	0	0	4.28e-06	0	0	0	4.68e-06	0	5.67e-06	0	6.07e-06	4.07e-06	6.3e-06	0	0	0.206105	0.33425	-0.270517
K04517	0.000486015	0.000561996	0.000514263	0.000579251	0.000486997	0.000534675	0.000507096	0.000516754	0.000521749	0.000571284	0.000512735	0.000550233	0.000555898	0.000485738	0.000631354	0.000529441	0.00062027	0.000491354	0.205511	0.333436	-3.95797
K00133	0.000907558	0.000925641	0.000923853	0.000975356	0.000964891	0.000941028	0.000870737	0.000902959	0.000963229	0.00098804	0.000882495	0.000884911	0.000873554	0.000910758	0.000908336	0.000895007	0.000952042	0.000876149	0.205268	0.333152	7.97178
K00573	9.92e-06	2.31e-05	1.82e-05	1.7e-05	2.28e-05	8.55e-06	1.67e-05	2.18e-05	1.46e-05	1.87e-05	1.97e-05	1.7e-05	9.34e-06	4.25e-05	1.22e-05	4.41e-05	1.44e-05	2.96e-05	0.205176	0.333114	-0.645328
K09116	9.42e-05	0.000105788	0.000118326	0.000140554	0.00010013	0.000119767	0.000133446	9.25e-05	0.000149592	0.000112384	0.000123253	0.000119123	0.000112114	0.000151793	0.000118124	0.000157572	0.000134632	0.000130238	0.204991	0.332923	-2.07532
K08320	4.96e-06	0	0	4.26e-06	4.55e-06	4.28e-06	3.34e-06	0	3.65e-06	4.68e-06	4.93e-06	0	4.67e-06	1.21e-05	4.07e-06	6.3e-06	4.81e-06	0	0.20426	0.331846	-0.397825
K00949	0.000535608	0.000657866	0.000550671	0.000630361	0.000614435	0.000654442	0.000607181	0.000658181	0.000660396	0.000618111	0.000631058	0.000629648	0.000705383	0.000576813	0.000712819	0.000598772	0.000764519	0.000639352	0.203958	0.331466	-3.67965
K04654	2.98e-05	5.62e-05	5.92e-05	3.83e-05	4.55e-05	3.42e-05	6.01e-05	5.44e-05	4.01e-05	5.62e-05	4.44e-05	5.11e-05	7.47e-05	4.25e-05	4.89e-05	4.41e-05	5.29e-05	6.51e-05	0.203783	0.331291	-1.42934
K15912	0	0	0	4.26e-06	4.55e-06	0	0	0	3.65e-06	4.68e-06	0	0	4.67e-06	6.07e-06	0	6.3e-06	4.81e-06	0	0.203502	0.330944	-0.274326
K10914	7.93e-05	7.27e-05	8.19e-05	5.54e-05	4.55e-05	7.27e-05	5.67e-05	8.7e-05	6.57e-05	8.9e-05	7.89e-05	5.67e-05	9.34e-05	7.89e-05	9.37e-05	7.56e-05	7.69e-05	5.33e-05	0.203443	0.330944	-1.63573
K02876	0.00132414	0.0013554	0.00123787	0.00126072	0.00124252	0.00135166	0.00123771	0.00121845	0.00130985	0.00125964	0.00132621	0.00124228	0.001308	0.00123863	0.0011731	0.00121015	0.00123092	0.00126686	0.203399	0.330944	7.98953
K00867	4.96e-06	0	9.1e-06	0	4.55e-06	4.28e-06	3.34e-06	5.44e-06	0	0	0	0	0	0	0	0	0	1.18e-05	0.203362	0.330944	0.216698
K00564	0.000114065	0.00015207	0.000145632	0.000153331	0.000122887	8.98e-05	0.000120102	0.00010879	0.000109458	0.000112384	0.000187345	0.00020421	0.000102771	0.000218582	6.92e-05	0.000239509	6.73e-05	0.000195358	0.203125	0.330771	-0.888141
K19872	0	3.31e-06	0	0	0	4.28e-06	3.34e-06	0	3.65e-06	0	0	0	4.67e-06	0	0	0	0	0	0.202897	0.330509	0.192783
K06131	0.000704225	0.000809936	0.000732711	0.000719804	0.00079649	0.000744267	0.000730619	0.000832245	0.000784448	0.000721129	0.000769102	0.000737425	0.000775455	0.000661817	0.000798358	0.000617681	0.000750094	0.000734071	0.202856	0.330509	4.59956
K03685	0.00105138	0.0011273	0.00102853	0.00103498	0.00114239	0.00109501	0.00113429	0.000984552	0.00109823	0.00112852	0.00118816	0.00110614	0.00111647	0.00110505	0.00102646	0.0011093	0.00109629	0.00109519	0.202647	0.330322	-7.10782
K14128	4.96e-06	9.92e-06	4.55e-06	4.26e-06	4.55e-06	4.28e-06	1.33e-05	1.09e-05	7.3e-06	4.68e-06	9.86e-06	1.13e-05	4.67e-06	1.21e-05	4.07e-06	1.26e-05	9.62e-06	1.78e-05	0.2026	0.330322	-0.660362
K02099	7.44e-05	8.93e-05	5.92e-05	9.8e-05	5.01e-05	7.7e-05	0.000100085	4.35e-05	9.49e-05	9.37e-05	3.94e-05	5.67e-05	7.94e-05	3.64e-05	6.92e-05	6.3e-05	7.69e-05	5.92e-05	0.202077	0.329613	1.11488
K03388	0.000168617	0.000175211	0.000168387	0.000149072	0.000168401	0.000153986	0.000146791	0.000206701	0.000145944	0.000187306	0.000167625	0.000192865	0.000149485	0.00021251	0.000138491	0.00017648	0.000216373	0.000171678	0.201584	0.328919	-2.38203
K11041	9.92e-06	9.92e-06	2.28e-05	1.7e-05	1.37e-05	8.55e-06	1.67e-05	5.44e-06	2.19e-05	2.34e-05	4.93e-06	1.13e-05	1.87e-05	0	1.22e-05	0	9.62e-06	5.92e-06	0.20127	0.328516	0.531471
K18778	9.92e-06	3.31e-06	9.1e-06	4.26e-06	4.55e-06	8.55e-06	3.34e-06	5.44e-06	3.65e-06	0	0	0	4.67e-06	6.07e-06	4.07e-06	1.26e-05	4.81e-06	0	0.201232	0.328516	0.423576
K19050	9.92e-06	6.61e-06	9.1e-06	0	0	0	3.34e-06	5.44e-06	0	0	0	0	4.67e-06	0	4.07e-06	6.3e-06	0	0	0.200444	0.327385	0.255993
K01256	2.98e-05	3.31e-05	3.64e-05	2.98e-05	5.01e-05	2.57e-05	5.67e-05	3.81e-05	5.11e-05	1.87e-05	2.47e-05	2.27e-05	1.87e-05	5.46e-05	2.44e-05	3.78e-05	2.4e-05	5.33e-05	0.200339	0.327323	0.878596
K02995	9.92e-06	9.92e-06	9.1e-06	4.26e-06	4.55e-06	8.55e-06	1e-05	1.09e-05	1.09e-05	4.68e-06	1.48e-05	1.7e-05	4.67e-06	2.43e-05	4.07e-06	1.89e-05	4.81e-06	1.78e-05	0.199324	0.325774	-0.578642
K06193	4.96e-06	3.31e-06	0	4.26e-06	4.55e-06	4.28e-06	3.34e-06	5.44e-06	3.65e-06	0	4.93e-06	5.67e-06	1.4e-05	1.21e-05	8.15e-06	1.26e-05	0	0	0.199074	0.325473	-0.38893
K08965	4.96e-06	6.61e-06	0	0	4.55e-06	0	0	0	3.65e-06	9.37e-06	4.93e-06	5.67e-06	9.34e-06	0	4.07e-06	0	4.81e-06	0	0.199043	0.325473	-0.317391
K09000	4.96e-06	1.65e-05	1.37e-05	1.7e-05	2.28e-05	4.28e-06	1.67e-05	1.09e-05	1.46e-05	9.37e-06	9.86e-06	1.7e-05	1.87e-05	3.04e-05	1.22e-05	3.78e-05	9.62e-06	2.37e-05	0.198979	0.325473	-0.619973
K00809	9.92e-06	3.31e-05	1.82e-05	8.52e-06	9.1e-06	8.55e-06	3.34e-05	2.18e-05	2.19e-05	1.87e-05	2.96e-05	3.4e-05	1.4e-05	3.04e-05	1.22e-05	3.15e-05	1.44e-05	3.55e-05	0.19816	0.324305	-0.698049
K06191	4.96e-06	0	0	0	9.1e-06	0	3.34e-06	0	3.65e-06	4.68e-06	0	1.13e-05	4.67e-06	6.07e-06	0	0	4.81e-06	1.18e-05	0.19804	0.324215	-0.292706
K01598	4.96e-06	9.92e-06	1.82e-05	8.52e-06	9.1e-06	4.28e-06	1.33e-05	0	1.09e-05	9.37e-06	9.86e-06	5.67e-06	9.34e-06	3.04e-05	4.07e-06	1.89e-05	9.62e-06	2.37e-05	0.19794	0.324161	-0.485725
K18532	4.96e-06	1.32e-05	9.1e-06	4.26e-06	4.55e-06	4.28e-06	1.33e-05	1.63e-05	1.09e-05	9.37e-06	1.48e-05	2.27e-05	4.67e-06	1.82e-05	4.07e-06	1.89e-05	4.81e-06	1.78e-05	0.19788	0.324161	-0.576872
K15836	0	0	0	4.26e-06	0	0	0	0	0	0	4.93e-06	0	0	6.07e-06	0	6.3e-06	0	0	0.197799	0.324146	-0.167652
K01505	0	0	0	4.26e-06	4.55e-06	0	0	0	3.65e-06	4.68e-06	4.93e-06	0	0	6.07e-06	0	6.3e-06	4.81e-06	0	0.197707	0.324105	-0.277843
K17249	0	0	0	4.26e-06	4.55e-06	0	0	0	3.65e-06	4.68e-06	4.93e-06	0	0	6.07e-06	0	6.3e-06	4.81e-06	0	0.197707	0.324105	-0.277843
K01574	0	0	0	0	4.55e-06	0	0	0	0	0	0	0	0	6.07e-06	0	6.3e-06	0	5.92e-06	0.197498	0.323978	-0.168772
K01126	0.000550486	0.000704149	0.000609834	0.000707027	0.00059623	0.000573171	0.000597172	0.00056027	0.000685936	0.000655572	0.000655709	0.000754443	0.000555898	0.00074075	0.000610988	0.000680709	0.000677969	0.000609752	0.197285	0.323738	-3.27617
K01728	3.97e-05	2.98e-05	5.46e-05	5.54e-05	5.46e-05	2.99e-05	2e-05	7.07e-05	2.55e-05	4.68e-06	3.45e-05	2.84e-05	1.87e-05	6.07e-05	3.67e-05	6.3e-05	4.81e-06	1.78e-05	0.19682	0.323083	0.596262
K07577	4.96e-06	9.92e-06	4.55e-06	4.26e-06	4.55e-06	4.28e-06	6.67e-06	1.63e-05	1.09e-05	9.37e-06	1.48e-05	5.67e-06	4.67e-06	2.43e-05	4.07e-06	1.26e-05	9.62e-06	1.18e-05	0.196378	0.322466	-0.545965
K02837	0.000535608	0.000436374	0.00040959	0.000459993	0.000505202	0.000513288	0.000473734	0.000533072	0.000459723	0.000472948	0.000384551	0.000419765	0.000439113	0.00038859	0.000590622	0.000415989	0.000504871	0.000378875	0.196286	0.322423	2.56371
K07708	9.92e-06	3.31e-06	1.37e-05	4.26e-06	4.55e-06	1.28e-05	6.67e-06	1.09e-05	3.65e-06	4.68e-06	4.93e-06	0	9.34e-06	6.07e-06	4.07e-06	1.26e-05	4.81e-06	0	0.196023	0.322098	0.510648
K15780	3.97e-05	5.29e-05	3.19e-05	4.26e-05	5.01e-05	4.71e-05	1.67e-05	2.18e-05	2.55e-05	4.68e-05	3.45e-05	5.11e-05	5.14e-05	7.29e-05	3.26e-05	6.3e-05	2.88e-05	2.96e-05	0.195567	0.321457	-0.918029
K02565	0	0	0	0	0	0	0	0	3.65e-06	0	0	0	4.67e-06	0	4.07e-06	0	9.62e-06	0	0.195342	0.321195	-0.153307
K09251	9.92e-06	9.92e-06	9.1e-06	1.7e-05	1.82e-05	2.14e-05	1.67e-05	1.63e-05	1.82e-05	9.37e-06	4.93e-06	1.7e-05	4.67e-06	1.82e-05	4.07e-06	6.3e-06	1.44e-05	2.37e-05	0.19501	0.320757	0.720274
K11337	0	6.61e-06	4.55e-06	8.52e-06	9.1e-06	0	6.67e-06	1.63e-05	7.3e-06	4.68e-06	0	0	0	1.21e-05	0	1.26e-05	0	0	0.194639	0.320255	0.306288
K15527	2.48e-05	2.64e-05	2.73e-05	2.13e-05	1.82e-05	2.14e-05	2.34e-05	2.18e-05	1.82e-05	2.81e-05	1.97e-05	2.27e-05	2.8e-05	3.64e-05	2.04e-05	2.52e-05	1.92e-05	2.96e-05	0.194471	0.320086	-1.67685
K11131	4.96e-06	6.61e-06	1.37e-05	8.52e-06	9.1e-06	8.55e-06	1.33e-05	1.09e-05	1.09e-05	9.37e-06	1.97e-05	1.7e-05	4.67e-06	3.04e-05	4.07e-06	1.26e-05	4.81e-06	2.37e-05	0.193904	0.31926	-0.551609
K00655	0.00145309	0.00153723	0.00140171	0.00144813	0.00144279	0.00136877	0.00146124	0.00143603	0.00142295	0.00149377	0.00148397	0.00136707	0.00154624	0.00139649	0.00147044	0.00143075	0.0015627	0.00156878	0.193538	0.318765	-7.79389
K13001	4.96e-06	6.61e-06	4.55e-06	0	9.1e-06	0	6.67e-06	5.44e-06	3.65e-06	9.37e-06	1.48e-05	0	9.34e-06	1.21e-05	8.15e-06	6.3e-06	4.81e-06	0	0.193065	0.318092	-0.458379
K02335	0.000912517	0.000826465	0.000823731	0.000817766	0.000878415	0.000816983	0.000844048	0.000805048	0.000788097	0.000908435	0.000882495	0.000816841	0.000887568	0.000910758	0.00083909	0.000850887	0.000778944	0.000876149	0.192977	0.318054	-6.63489
K16139	1.98e-05	9.92e-06	2.28e-05	3.41e-05	3.19e-05	2.14e-05	2.34e-05	2.18e-05	2.19e-05	1.87e-05	3.94e-05	2.84e-05	3.27e-05	2.43e-05	3.67e-05	2.52e-05	1.92e-05	2.37e-05	0.192828	0.317916	-1.14226
K10819	0	0	4.55e-06	0	0	8.55e-06	3.34e-06	5.44e-06	0	0	0	0	0	0	0	6.3e-06	0	0	0.192661	0.317748	0.187443
K19802	0.000153739	8.93e-05	0.000145632	0.000119258	0.000113784	0.000124045	0.000103421	0.000152306	0.000109458	0.000107701	0.000113393	0.000175848	0.000168171	0.000133578	0.000154784	0.000113452	0.000125016	0.000159838	0.192445	0.317499	-1.74015
K02588	0.000109105	0.000105788	9.1e-05	0.000102221	0.000122887	0.000106935	9.67e-05	8.7e-05	8.03e-05	0.000103018	0.000103533	0.000102105	8.41e-05	0.00013965	0.000138491	0.000151269	9.62e-05	9.47e-05	0.192322	0.317403	-1.78838
K11905	0	3.31e-06	4.55e-06	0	0	0	0	5.44e-06	0	4.68e-06	0	0	0	0	4.07e-06	6.3e-06	9.62e-06	5.92e-06	0.192254	0.317398	-0.263522
K09167	1.49e-05	2.64e-05	3.19e-05	1.28e-05	1.82e-05	8.55e-06	1.33e-05	2.72e-05	1.82e-05	9.37e-06	4.93e-06	1.13e-05	1.87e-05	1.21e-05	3.26e-05	1.26e-05	4.81e-06	1.78e-05	0.192151	0.317335	0.65001
K06286	2.98e-05	3.97e-05	4.55e-05	2.98e-05	4.55e-05	2.99e-05	3.67e-05	2.72e-05	3.65e-05	6.09e-05	3.94e-05	3.97e-05	6.54e-05	4.25e-05	2.04e-05	3.15e-05	2.88e-05	6.51e-05	0.191985	0.317167	-1.01557
K03406	0.000466177	0.000661172	0.000691752	0.00095406	0.00116515	0.000932473	0.000914107	0.00140339	0.00083188	0.000561919	0.000443713	0.000720408	0.000644655	0.000673961	0.00141749	0.000655498	0.000860685	0.000343356	0.191569	0.316587	0.879141
K03977	0.000957151	0.000935559	0.000942057	0.000911468	0.00100585	0.000932473	0.000874073	0.000854003	0.000941338	0.000959945	0.000902216	0.000975671	0.000966982	0.000922901	0.000912409	0.00100216	0.000947234	0.00100047	0.191315	0.316273	-7.48298
K09803	7.44e-05	5.95e-05	9.1e-05	6.39e-05	9.56e-05	0.000102658	9.34e-05	7.07e-05	0.000116755	8.43e-05	6.41e-05	7.94e-05	6.07e-05	9.11e-05	7.33e-05	8.19e-05	6.73e-05	7.7e-05	0.190456	0.31496	1.70439
K01119	0.000158699	0.000132234	0.000154734	0.000136294	0.000154747	0.000149709	0.000143455	0.000168625	0.00015689	0.000117066	0.000133114	0.000124795	0.000158828	0.000157865	0.00016293	0.000157572	0.000139441	0.000106559	0.190223	0.314681	2.81511
K13891	1.98e-05	1.32e-05	2.73e-05	4.26e-06	9.1e-06	1.28e-05	2.34e-05	2.72e-05	2.55e-05	4.68e-06	4.93e-06	1.13e-05	2.34e-05	6.07e-06	1.22e-05	6.3e-06	3.37e-05	5.92e-06	0.190105	0.314592	0.525309
K00231	0	6.61e-06	4.55e-06	4.26e-06	9.1e-06	4.28e-06	6.67e-06	5.44e-06	7.3e-06	9.37e-06	4.93e-06	5.67e-06	9.34e-06	1.82e-05	4.07e-06	1.89e-05	0	5.92e-06	0.189295	0.313357	-0.464713
K02063	1.49e-05	1.32e-05	1.37e-05	8.52e-06	1.37e-05	1.28e-05	1.67e-05	1.63e-05	2.19e-05	1.4e-05	2.96e-05	2.27e-05	4.67e-06	2.43e-05	8.15e-06	3.15e-05	1.44e-05	2.37e-05	0.189063	0.31308	-0.77649
K04046	2.98e-05	1.32e-05	1.37e-05	4.26e-06	0	4.28e-06	6.67e-06	0	7.3e-06	0	4.93e-06	5.67e-06	0	1.21e-05	0	1.26e-05	0	0	0.188944	0.312988	0.274573
K10201	0.000213251	0.000208269	0.000177489	0.000174627	0.000236671	0.000179651	0.000150127	0.000174064	0.000160538	0.000309055	0.000221856	0.00020421	0.000266271	0.000133578	0.000248468	0.00013236	0.00025484	0.000177598	0.188845	0.31293	-1.39504
K18325	0	0	0	0	0	0	0	0	3.65e-06	0	0	0	4.67e-06	6.07e-06	0	0	4.81e-06	0	0.188666	0.312739	-0.170078
K10121	9.92e-06	6.61e-06	9.1e-06	4.26e-05	3.64e-05	2.14e-05	2.67e-05	2.72e-05	1.09e-05	9.37e-06	9.86e-06	2.27e-05	1.4e-05	6.07e-06	2.44e-05	1.26e-05	2.4e-05	5.92e-06	0.187788	0.311389	0.546481
K02001	1.98e-05	6.61e-06	2.73e-05	0	0	4.28e-06	0	5.44e-06	0	0	0	0	4.67e-06	0	4.07e-06	6.3e-06	0	5.92e-06	0.18763	0.311233	0.210391
K00836	2.48e-05	2.64e-05	1.82e-05	4.26e-05	3.64e-05	5.13e-05	3.67e-05	3.81e-05	2.92e-05	2.81e-05	5.92e-05	2.84e-05	3.27e-05	4.86e-05	3.26e-05	4.41e-05	4.33e-05	4.74e-05	0.187169	0.310573	-1.1677
K01283	2.98e-05	1.32e-05	1.82e-05	1.28e-05	4.55e-06	2.14e-05	2.34e-05	1.63e-05	1.82e-05	0	9.86e-06	1.7e-05	9.34e-06	2.43e-05	0	2.52e-05	4.81e-06	1.78e-05	0.186929	0.31028	0.570572
K07669	0	0	0	0	0	0	0	0	3.65e-06	4.68e-06	0	0	0	0	0	6.3e-06	4.81e-06	0	0.186802	0.310175	-0.170152
K18478	4.96e-06	3.31e-06	4.55e-06	8.52e-06	0	4.28e-06	0	1.09e-05	7.3e-06	4.68e-06	4.93e-06	1.13e-05	4.67e-06	6.07e-06	4.07e-06	6.3e-06	9.62e-06	1.18e-05	0.186158	0.309211	-0.582502
K02533	7.93e-05	5.95e-05	5.46e-05	5.54e-05	5.01e-05	4.28e-05	8.34e-05	4.35e-05	6.57e-05	3.28e-05	4.93e-05	5.11e-05	3.74e-05	7.89e-05	3.67e-05	7.56e-05	3.85e-05	4.14e-05	0.185816	0.308747	1.1247
K11202	9.92e-06	6.61e-06	4.55e-06	4.26e-06	9.1e-06	4.28e-06	3.34e-06	5.44e-06	3.65e-06	4.68e-06	0	0	0	1.21e-05	4.07e-06	0	4.81e-06	5.92e-06	0.185323	0.308032	0.452053
K10235	4.96e-06	3.31e-06	4.55e-06	0	0	0	0	0	3.65e-06	4.68e-06	4.93e-06	0	0	6.07e-06	4.07e-06	6.3e-06	4.81e-06	0	0.18531	0.308032	-0.351736
K10557	4.96e-06	9.92e-06	9.1e-06	1.28e-05	9.1e-06	0	6.67e-06	1.63e-05	1.09e-05	9.37e-06	9.86e-06	1.13e-05	9.34e-06	1.82e-05	4.07e-06	1.89e-05	9.62e-06	1.78e-05	0.185118	0.307901	-0.70163
K02519	0.000763737	0.00082316	0.000755466	0.000762396	0.000791939	0.000782764	0.00076398	0.00078329	0.000737016	0.000805417	0.000793753	0.000777133	0.000808154	0.000758965	0.000810577	0.000743738	0.000778944	0.000876149	0.185053	0.307897	-7.99282
K03415	7.44e-05	9.26e-05	7.74e-05	0.000132035	0.000141093	0.000106935	0.000116766	0.000141427	0.000127701	8.9e-05	6.41e-05	0.000102105	0.000116785	8.5e-05	0.000146637	6.3e-05	0.000110591	7.7e-05	0.184534	0.307139	1.28132
K03451	4.46e-05	4.3e-05	3.64e-05	6.39e-05	5.46e-05	6.84e-05	4.34e-05	5.44e-05	5.47e-05	5.15e-05	4.44e-05	3.97e-05	3.74e-05	2.43e-05	6.92e-05	4.41e-05	3.85e-05	4.74e-05	0.184111	0.306539	1.38166
K03930	9.92e-06	1.65e-05	1.82e-05	1.7e-05	1.82e-05	1.71e-05	1e-05	1.63e-05	7.3e-06	9.37e-06	1.97e-05	2.84e-05	9.34e-06	3.64e-05	2.44e-05	1.89e-05	1.44e-05	1.18e-05	0.183893	0.306279	-0.773303
K10010	5.95e-05	4.63e-05	5.92e-05	5.11e-05	5.01e-05	6.84e-05	4e-05	4.35e-05	6.57e-05	6.56e-05	4.44e-05	8.51e-05	4.2e-05	4.86e-05	6.11e-05	5.04e-05	9.62e-05	8.29e-05	0.183263	0.305334	-1.23643
K03338	4.46e-05	2.31e-05	3.19e-05	2.13e-05	2.28e-05	2.14e-05	2.67e-05	4.35e-05	3.28e-05	3.28e-05	3.94e-05	1.7e-05	5.61e-05	2.43e-05	6.92e-05	3.78e-05	3.85e-05	2.96e-05	0.183242	0.305334	-0.863167
K10742	4.96e-06	0	0	0	0	4.28e-06	3.34e-06	0	0	4.68e-06	4.93e-06	0	0	6.07e-06	0	6.3e-06	0	5.92e-06	0.183205	0.305334	-0.285138
K00100	3.97e-05	4.63e-05	4.55e-05	2.56e-05	5.01e-05	2.14e-05	4.34e-05	3.81e-05	5.47e-05	4.21e-05	1.48e-05	3.4e-05	3.74e-05	3.04e-05	4.89e-05	1.89e-05	4.33e-05	2.96e-05	0.183155	0.305334	1.0962
K03642	7.44e-05	5.62e-05	8.65e-05	5.11e-05	5.01e-05	4.28e-05	8.34e-05	6.53e-05	8.03e-05	3.75e-05	5.42e-05	4.54e-05	4.67e-05	7.89e-05	4.89e-05	8.19e-05	4.33e-05	5.92e-05	0.182883	0.305116	1.24726
K03444	9.92e-06	9.92e-06	1.37e-05	1.7e-05	2.28e-05	2.14e-05	6.67e-06	2.72e-05	1.09e-05	9.37e-06	9.86e-06	1.13e-05	1.87e-05	1.21e-05	2.04e-05	6.3e-06	9.62e-06	5.92e-06	0.182872	0.305116	0.730917
K22606	4.96e-06	9.92e-06	0	4.26e-06	0	4.28e-06	0	5.44e-06	3.65e-06	9.37e-06	4.93e-06	5.67e-06	4.67e-06	6.07e-06	8.15e-06	6.3e-06	4.81e-06	0	0.1827	0.305019	-0.510887
K11442	0	6.61e-06	0	0	4.55e-06	0	3.34e-06	0	0	0	1.97e-05	1.13e-05	0	0	4.07e-06	0	0	1.18e-05	0.182543	0.304861	-0.205176
K06609	0	9.92e-06	0	0	4.55e-06	0	0	0	0	0	0	0	0	0	0	0	0	0	0.182523	0.304861	0.108231
K09127	0	6.61e-06	9.1e-06	8.52e-06	9.1e-06	0	1e-05	5.44e-06	7.3e-06	4.68e-06	0	1.13e-05	1.4e-05	2.43e-05	8.15e-06	1.89e-05	4.81e-06	5.92e-06	0.182098	0.304325	-0.446282
K01664	1.49e-05	9.92e-06	4.55e-06	1.28e-05	4.55e-06	4.28e-06	6.67e-06	5.44e-06	1.09e-05	4.68e-06	0	5.67e-06	0	1.21e-05	4.07e-06	6.3e-06	4.81e-06	1.18e-05	0.182009	0.304281	0.544739
K05922	4.96e-06	3.31e-06	4.55e-06	4.26e-06	4.55e-06	0	3.34e-06	0	3.65e-06	9.37e-06	4.93e-06	0	4.67e-06	6.07e-06	4.07e-06	6.3e-06	9.62e-06	0	0.181792	0.304023	-0.487287
K04651	0.000114065	0.000254551	0.000218448	0.000183146	0.000172952	0.000119767	0.000240203	0.000163185	0.000251753	0.00021072	0.000231717	0.000192865	0.000196199	0.000230725	0.000199589	0.000207995	0.000211565	0.000301916	0.181501	0.303639	-1.51712
K09943	0	3.31e-06	4.55e-06	0	0	0	3.34e-06	0	0	4.68e-06	0	5.67e-06	4.67e-06	0	4.07e-06	0	0	5.92e-06	0.18145	0.303639	-0.2851
K01092	0.000287641	0.000300833	0.000295815	0.000276848	0.000277634	0.000256644	0.000310263	0.000315492	0.000288239	0.000220085	0.000246507	0.000277953	0.000228899	0.000333945	0.000199589	0.00035296	0.000221181	0.000290076	0.181011	0.303026	2.27773
K01938	0.000679429	0.000700843	0.000650793	0.000664435	0.000773733	0.000697216	0.000697257	0.00077785	0.00067499	0.000721129	0.000778962	0.00070339	0.000756769	0.000704319	0.00068838	0.000687012	0.000764519	0.000751831	0.180083	0.301576	-5.87246
K16179	0	3.31e-06	0	0	0	0	0	0	7.3e-06	0	4.93e-06	5.67e-06	0	1.21e-05	0	1.26e-05	0	0	0.179446	0.300612	-0.203946
K09786	0	0	0	0	0	0	0	0	0	0	0	0	0	6.07e-06	0	1.26e-05	0	0	0.17903	0.300019	-0.109878
K01738	0.00100675	0.00104135	0.0011332	0.00104776	0.00106047	0.000996634	0.00108759	0.00113686	0.00107999	0.0011613	0.00113393	0.00107778	0.00106508	0.00108684	0.00107941	0.00112821	0.00103859	0.00108335	0.1789	0.299903	-8.10069
K03458	0.000183495	0.000158681	0.000150183	0.000170368	0.000163849	0.000201038	0.000170144	0.00022302	0.000160538	0.000131114	9.37e-05	9.64e-05	0.000224228	9.11e-05	0.000256615	0.000100846	0.000206757	7.7e-05	0.178898	0.299903	1.0355
K00549	4.46e-05	2.64e-05	5.46e-05	3.83e-05	6.83e-05	3.85e-05	4e-05	3.26e-05	4.01e-05	2.81e-05	2.96e-05	3.4e-05	1.87e-05	6.07e-05	3.26e-05	4.41e-05	3.37e-05	2.96e-05	0.178013	0.29862	1.06014
K01207	0.000416584	0.000452903	0.000523365	0.000511104	0.000477894	0.000436295	0.000493751	0.000402524	0.000459723	0.000454218	0.000497944	0.000487835	0.00046247	0.000461451	0.00051323	0.000460109	0.000596228	0.000497274	0.177393	0.297682	-3.71075
K09775	0.000486015	0.000446291	0.000336774	0.000417401	0.000455137	0.000483346	0.000420356	0.000386205	0.000463372	0.000444852	0.000409202	0.000334678	0.000490498	0.000346088	0.000395106	0.000359263	0.000456788	0.000343356	0.177384	0.297682	2.62549
K00171	0.000138861	0.000158681	0.00013653	0.000208701	0.000218466	0.000273753	0.000163472	0.000130548	0.000167835	0.000168576	0.000142974	0.000153158	0.000168171	0.000151793	0.000171077	0.000151269	0.000105782	0.000165758	0.176997	0.297221	1.51099
K22405	2.48e-05	3.64e-05	2.28e-05	2.98e-05	1.82e-05	1.71e-05	1e-05	2.18e-05	1.46e-05	1.87e-05	1.48e-05	1.7e-05	9.34e-06	1.21e-05	2.85e-05	1.26e-05	2.88e-05	5.92e-06	0.176721	0.29686	0.798014
K01342	4.96e-06	3.31e-06	1.37e-05	0	4.55e-06	4.28e-06	6.67e-06	5.44e-06	0	4.68e-06	0	0	4.67e-06	6.07e-06	0	6.3e-06	0	0	0.176496	0.296583	0.338844
K20370	0	3.31e-06	4.55e-06	0	0	0	0	0	0	0	4.93e-06	5.67e-06	0	6.07e-06	0	0	0	5.92e-06	0.176476	0.296583	-0.229677
K00951	0.00110097	0.000942171	0.000996669	0.000971097	0.00112419	0.00103941	0.00103087	0.000951915	0.000948635	0.000927166	0.000976168	0.000958653	0.00106508	0.000928973	0.00103868	0.000907613	0.000918384	0.00101231	0.176476	0.296583	5.31506
K07093	0	3.31e-06	4.55e-06	4.26e-06	4.55e-06	0	0	0	0	4.68e-06	0	5.67e-06	0	6.07e-06	4.07e-06	6.3e-06	4.81e-06	0	0.176256	0.296485	-0.359557
K16651	9.92e-06	1.65e-05	9.1e-06	8.52e-06	0	8.55e-06	6.67e-06	5.44e-06	7.3e-06	0	4.93e-06	0	9.34e-06	1.21e-05	8.15e-06	6.3e-06	4.81e-06	0	0.174696	0.293962	0.499474
K05666	0	0	0	0	0	0	0	0	0	9.37e-06	0	0	0	0	0	0	4.81e-06	0	0.174691	0.293962	-0.111973
K01974	4.96e-06	1.32e-05	4.55e-06	4.26e-06	4.55e-06	8.55e-06	1e-05	1.63e-05	7.3e-06	9.37e-06	1.48e-05	2.84e-05	0	3.04e-05	4.07e-06	1.26e-05	4.81e-06	1.78e-05	0.174678	0.293962	-0.451607
K04095	0.000312438	0.000350421	0.000373182	0.000293885	0.000309493	0.000384966	0.000353633	0.000375326	0.000335671	0.000379295	0.000256367	0.00031766	0.000341013	0.000364303	0.000321787	0.000327749	0.000274073	0.000284156	0.174551	0.293962	2.99739
K01965	0	6.61e-06	9.1e-06	4.26e-06	4.55e-06	4.28e-06	1e-05	1.63e-05	0	4.68e-06	0	0	4.67e-06	0	4.07e-06	6.3e-06	4.81e-06	5.92e-06	0.174263	0.293638	0.38934
K15876	9.92e-06	9.92e-06	1.82e-05	4.26e-06	9.1e-06	4.28e-06	1e-05	1.09e-05	7.3e-06	9.37e-06	4.93e-06	5.67e-06	4.67e-06	6.07e-06	8.15e-06	6.3e-06	1.44e-05	0	0.17414	0.293531	0.662013
K07568	0.00118528	0.00112399	0.00116961	0.00112869	0.00118791	0.00109074	0.00105756	0.00113142	0.00111282	0.00110979	0.00118323	0.00108912	0.0011445	0.00104434	0.00107941	0.0010967	0.00103859	0.00113071	0.174045	0.293472	8.31101
K02041	4.96e-05	5.62e-05	5.46e-05	6.39e-05	3.19e-05	3.85e-05	6.67e-05	5.98e-05	8.39e-05	5.15e-05	7.89e-05	5.67e-05	5.61e-05	8.5e-05	7.74e-05	5.67e-05	5.29e-05	7.7e-05	0.173958	0.293427	-1.41518
K02458	0	0	9.1e-06	0	4.55e-06	0	0	5.44e-06	3.65e-06	0	0	0	0	6.07e-06	0	0	0	0	0.173505	0.292763	0.194524
K03737	0.000614957	0.000700843	0.000628038	0.00058351	0.000628089	0.000573171	0.000593836	0.00066906	0.000602018	0.000697716	0.000665569	0.000623975	0.000658669	0.000686104	0.000590622	0.000636589	0.000586612	0.000704471	0.173424	0.292727	-5.01752
K06330	2.98e-05	1.98e-05	1.37e-05	2.98e-05	4.55e-05	4.71e-05	1.67e-05	1.09e-05	3.65e-05	1.4e-05	9.86e-06	2.84e-05	1.87e-05	1.21e-05	3.26e-05	1.89e-05	3.37e-05	1.18e-05	0.173413	0.292727	0.694042
K02464	4.96e-06	3.31e-06	4.55e-06	8.52e-06	4.55e-06	4.28e-06	6.67e-06	5.44e-06	0	4.68e-06	0	0	4.67e-06	6.07e-06	0	6.3e-06	4.81e-06	0	0.173227	0.292598	0.49234
[truncated: 2,897 more rows]

## Sheet: KO_abundance
pathway	description	R01	R02	R03	R04	R05	R06	R07	R08	R09	R10	R14	R15	R16	R17	R18	R19	R20	R21	R22
ko00010	Glycolysis / Gluconeogenesis	393.274	439.424	401.61	461.744	449.801	471.477	429.17	459.795	409.838	484.62	465.583	488.862	485.43	476.672	478.226	495.501	473.341	489.27	486.915
ko00020	Citrate cycle (TCA cycle)	424.53	478.845	338.111	534.039	489.583	603.064	456.483	547.48	472.2	638.108	515.617	549.769	552.627	534.248	556.669	569.194	551.726	629.258	514.945
ko00030	Pentose phosphate pathway	595.795	637.171	692.722	661.324	660.402	706.462	626.574	652.973	629.646	684.137	673.634	675.711	660.034	648.447	625.349	673.454	632.66	710.202	687.021
ko00040	Pentose and glucuronate interconversions	218.537	231.533	294.726	245.011	244.643	303.865	266.91	232.746	265.66	198.48	217.403	215.972	231.706	220.698	268.536	229.152	263.8	320.728	246.369
ko00051	Fructose and mannose metabolism	286.785	356.926	372.748	328.758	322.275	325.144	344.86	347.402	345.719	350.148	319.382	328.066	323.762	327.648	377.785	334.114	360.141	325.457	341.345
ko00052	Galactose metabolism	278.165	302.831	383.226	281.576	275.323	252.601	320.231	311.096	347.537	318.183	276.779	278.369	275.736	261.499	355.75	247.411	337.71	230.553	299.708
ko00053	Ascorbate and aldarate metabolism	73.7692	63.7198	69.349	71.0728	87.4116	94.1305	85.9626	71.3925	88.1518	64.3472	72.7814	65.1846	73.6334	78.2763	110.987	81.5135	94.0005	0	85.1198
ko00061	Fatty acid biosynthesis	815.762	718.645	599.413	905.422	873.881	1016.89	800.76	848.116	830.25	880.429	899.923	928.027	947.736	974.312	881.738	1046.99	829.297	1069.84	910.729
ko00071	Fatty acid metabolism	121.564	135.241	111.296	159.737	169.893	204.581	138.451	149.147	127.847	134.45	135.416	150.978	146.672	158.587	183.97	167.897	171.953	224.138	163.251
ko00072	Synthesis and degradation of ketone bodies	130.269	164.453	153.65	342.827	304.446	577.168	248.821	215.765	0	220.278	262.49	248.837	287.523	284.763	145.85	366.063	164.532	668.2	257.301
ko00100	Steroid biosynthesis	14.7015	1.78753	1.17995	0.262909	0.200153	2.77075	7.82234	2.00884	11.9873	0.300088	2.32831	1.28139	3.33347	2.65074	54.6751	0.274335	37.198	0.40568	13.6841
ko00120	Primary bile acid biosynthesis	15.512	17.5291	40.1524	12.1644	15.7709	9.38255	13.3297	7.63031	17.6058	7.68255	6.03637	3.71897	6.13443	15.5068	9.75319	11.9045	8.63805	3.48922	14.8322
ko00121	Secondary bile acid biosynthesis	131.681	154.461	361.372	109.479	141.938	79.3765	109.39	68.6727	158.453	69.1429	54.3273	33.4706	55.2099	134.517	87.7788	107.14	77.7425	31.4029	133.49
ko00130	Ubiquinone and other terpenoid-quinone biosynthesis	176.878	175.958	103.717	205.618	175.729	242.33	215.514	237.36	165.776	315.565	153.308	204.041	192.011	152.649	318.652	163.279	301.548	223.583	225.391
ko00140	Steroid hormone biosynthesis	0.726616	2.93849	1.47635	0.858226	0.565111	0.39874	0.788902	3.33153	15.1946	0.498356	3.28306	0	3.71536	6.22251	47.648	1.3135	28.2308	1.48284	11.769
ko00190	Oxidative phosphorylation	207.262	222.977	149.54	242.272	235.812	238.81	210.788	256.293	235.378	294.731	235.629	260.196	249.4	246.602	262.302	254.169	258.32	247.167	243.469
ko00230	Purine metabolism	374.588	377.069	333.735	374.275	375.371	368.537	369.532	376.094	379.922	404.403	363.65	386.276	369.228	369.34	354.055	374.175	360.719	361.875	377.351
ko00240	Pyrimidine metabolism	491.369	520.606	453.532	520.904	520.341	516.989	513.985	515.443	518.05	561.352	496.613	519.913	494.089	483.354	465.305	492.154	483.502	503.223	517.916
ko00250	Alanine, aspartate and glutamate metabolism	724.51	678.343	666.364	715.891	688.642	713.137	732.702	721.206	745.759	771.646	688.598	707.498	685.913	681.043	655.099	678.031	639.64	693.023	674.352
ko00260	Glycine, serine and threonine metabolism	459.65	479.59	391.742	495.349	485.397	534.313	479.758	492.244	467.156	513.808	462.141	476.827	475.2	467.88	484.873	481.099	482.15	543.532	475.766
ko00270	Cysteine and methionine metabolism	470.226	503.385	471.208	512.374	480.6	510.957	516.333	487.825	456.044	495.053	486.897	450.384	483.85	454.801	460.409	457.298	474.296	510.627	479.453
ko00280	Valine, leucine and isoleucine degradation	133.787	140.148	101.019	218.694	229.595	343.698	193.865	158.986	142.831	122.817	159.327	158.72	190.527	212.596	211.406	248.302	199.576	385.624	195.383
ko00281	Geraniol degradation	53.926	28.612	14.557	69.1298	78.4258	143.342	58.4287	46.2592	33.6368	11.9761	28.8406	35.1071	57.3076	67.9416	87.7564	83.2108	68.3602	159.652	57.3432
ko00290	Valine, leucine and isoleucine biosynthesis	1045.23	903.442	857.127	1043.71	1008.19	1062.68	940.219	1045.26	1057.1	1082.56	1047.33	1151.78	1099.61	1104.65	996.916	1154.63	1001.57	1090.86	980.364
ko00300	Lysine biosynthesis	697.653	641.844	595.206	660.396	653.923	628.425	645.363	648.165	714.76	648.695	673.127	679.496	690.684	708.245	626.89	717.012	632.576	637.345	641.203
ko00310	Lysine degradation	58.8199	71.7085	59.6396	94.4204	103.614	143.225	79.4157	69.797	79.946	49.3225	76.8796	67.4398	87.9453	98.8951	119.94	109.017	111.362	161.79	99.9687
ko00311	Penicillin and cephalosporin biosynthesis	0.452948	0.314276	0.644928	0.341437	5.97531	0.180961	0.279812	7.95035	0.39368	0.958806	0	0.211717	0	0	0.477708	0	0.73632	0	0.153628
ko00312	beta-Lactam resistance	10.6019	21.3587	343.211	23.3697	7.97115	57.4213	13.5146	16.5172	80.4665	15.7595	62.6427	13.8329	29.9339	31.6676	16.0032	12.5695	23.4086	11.4386	25.9452
ko00330	Arginine and proline metabolism	274.29	263.867	247.97	309.518	290.93	300.121	289.431	322.406	301.483	340.855	308.119	317.956	300.216	298.59	313.134	299.927	304.559	308.931	293.985
ko00340	Histidine metabolism	478.431	454	455.562	548.462	523.922	595.501	502.639	531.478	496.693	540.001	534.053	538.929	576.83	574.029	510.714	598.927	527.22	626.78	537.732
ko00350	Tyrosine metabolism	102.609	90.1958	74.1927	123.155	113.92	161.273	110.35	105.857	99.3475	104.604	99.227	110.352	116.24	111.962	134.544	127.079	119.343	171.806	112.497
ko00360	Phenylalanine metabolism	124.342	123.685	88.1882	145.892	136.689	157.844	135.384	153.788	123.376	158.664	124.13	142.841	146.66	136.294	133.756	145.697	122.737	163.12	126.847
ko00361	Chlorocyclohexane and chlorobenzene degradation	12.1278	6.46262	2.79083	2.36353	17.8965	1.13998	3.64307	17.343	13.2274	1.65081	7.31756	3.50762	2.82214	6.44561	33.3679	2.63362	17.8679	0.369446	8.73802
ko00362	Benzoate degradation	26.6491	38.0955	43.6148	67.0886	61.9214	85.2319	46.6801	44.1809	33.3114	30.9048	51.2667	35.1705	58.2869	51.6399	46.4901	57.5316	41.3579	94.8426	52.4652
ko00363	Bisphenol degradation	0	0	0	0	0	0	0	0	0	0	0	42.2808	0	0	0	0	0	0	63.1566
ko00380	Tryptophan metabolism	0	69.7804	63.78	0	0	134.033	0	77.7329	78.0042	0	82.4817	76.6863	88.4868	89.9825	119.724	0	110.4	0	102.38
ko00400	Phenylalanine, tyrosine and tryptophan biosynthesis	559.385	532.91	517.922	597.78	557.962	586.144	563.934	607.194	601.325	651.862	612.869	631.977	624.969	611.461	585.687	624.67	574.143	586.501	582.128
ko00430	Taurine and hypotaurine metabolism	0	0	0	0	0	0	0	273.063	276.741	0	0	0	0	292.149	0	0	0	0	0
ko00440	Phosphonate and phosphinate metabolism	59.1904	17.8229	38.1761	40.9713	35.3049	51.7817	37.424	17.8086	16.1897	9.73558	34.0615	41.7632	32.1568	32.5952	41.1639	36.2336	44.3655	59.9421	31.1961
ko00450	Selenocompound metabolism	399.144	385.692	313.627	463.389	440.488	468.828	429.687	469.936	411.114	532.306	427.198	470.482	443.806	432.277	536.904	445.932	534.04	478.386	480.663
ko00471	D-Glutamine and D-glutamate metabolism	915.165	963.802	833.658	989.523	963.768	970.814	963.26	976.671	844.944	1071.9	940.824	979.869	944.786	904.83	618.015	931.11	738.1	949.517	904.221
ko00472	D-Arginine and D-ornithine metabolism	64.2058	19.4337	5.74583	49.6606	78.1687	5.06658	25.4623	43.7482	15.9831	4.33676	0	1.48209	0	8.68756	3.34395	0	4.93944	1.98933	1.07545
ko00473	D-Alanine metabolism	699.054	721.981	586.417	733.61	721.507	672.307	671.912	728.789	672.667	748.676	709.655	742.323	764.854	728.137	651.394	750.913	688.014	682.482	704.464
ko00480	Glutathione metabolism	232.451	194.848	128.73	217.409	236.359	233.107	219.548	236.112	175.973	250.671	202.009	240.431	213.836	224.662	235.497	234.033	231.07	231.011	232.54
ko00500	Starch and sucrose metabolism	312.03	366.264	416.48	363.623	346.177	351.558	375.491	368.149	382.264	389.387	356.337	358.398	370.136	353.484	360.666	353.393	355.199	344.682	364.243
ko00510	N-Glycan biosynthesis	23.3926	31.8923	49.0448	45.0349	39.3212	63.908	33.8578	38.5942	49.4147	45.1359	34.8441	43.9575	44.2626	48.0491	51.3645	55.8193	40.5063	67.4562	40.3965
ko00511	Other glycan degradation	247.885	400.797	512.366	278.659	230.592	215.752	396.747	391.641	468.142	453.671	177.686	189.692	190.056	178.36	667.485	107.951	575.406	150.525	297.876
ko00520	Amino sugar and nucleotide sugar metabolism	376.156	418.551	421.066	399.747	398.475	379.876	399.425	426.499	411.158	444.863	413.567	427.408	413.035	426.205	431.349	429.701	417.726	378.22	428.119
ko00521	Streptomycin biosynthesis	650.206	729.11	592.447	710.37	714.366	719.173	717.875	725.491	742.585	754.154	718.809	826.184	803.211	851.107	764.087	883.248	778.758	773.662	754.654
ko00531	Glycosaminoglycan degradation	62.847	118.174	107.177	81.8459	61.6812	40.4724	123.227	121.36	140.934	158.207	59.4275	55.8961	63.0825	48.2968	401.036	23.942	349.515	25.1455	131.104
ko00540	Lipopolysaccharide biosynthesis	633.947	476.743	321.144	553.309	537.598	613.422	561.667	569.431	613.52	669.242	479.138	641.68	610.969	691.465	631.351	746.311	628.023	616.021	553.553
ko00550	Peptidoglycan biosynthesis	830.856	843.441	776.729	824.959	815.047	798.209	809.357	806.322	772.953	847.308	818.3	848.31	847.347	839.28	659.271	858.776	728.345	801.214	789.536
ko00561	Glycerolipid metabolism	148.784	158.44	165.443	150.33	160.201	150.375	148.089	151.289	137.277	122.92	165.068	148.97	171.863	179.378	169.862	180.824	170.253	161.85	172.194
ko00562	Inositol phosphate metabolism	87.4358	88.4003	60.2375	74.0896	79.9416	79.9455	91.839	70.426	0	63.7416	66.5859	70.4155	79.0523	87.9215	82.4591	89.5959	85.3462	83.3427	77.784
ko00564	Glycerophospholipid metabolism	220.879	221.306	195.471	231.129	230.862	225.252	223.447	246.969	227.235	258.793	242.145	251.669	246.519	247.387	241.186	251.949	242.803	227.529	249.104
ko00591	Linoleic acid metabolism	161.858	84.4419	37.878	104.808	106.446	127.087	122.333	75.0465	0	38.065	87.8662	63.3183	76.0828	87.1171	84.0467	93.8226	71.8427	138.349	79.6468
ko00600	Sphingolipid metabolism	0	109.796	158.113	69.9795	61.5722	44.1848	0	110.565	132.963	0	56.5004	53.6518	54.5517	49.9681	225.203	0	177.38	24.8956	89.4778
ko00620	Pyruvate metabolism	421.081	444.793	407.358	487.354	479.043	484.076	435.086	498.863	439.106	519.002	534.613	533.256	525.354	538.175	479.614	550.7	474.755	510.451	501.059
ko00627	Aminobenzoate degradation	0	19.3573	0	0	24.5096	29.9492	19.5081	0	0	0	0	0	0	38.9461	0	35.7899	0	0	0
ko00630	Glyoxylate and dicarboxylate metabolism	251.83	210.112	226.603	255.173	253.909	300.63	264.621	242.843	237.028	236.61	235.334	238.183	242.067	257.787	284.035	265.71	279.443	310.97	244.133
ko00633	Nitrotoluene degradation	50.3612	52.5593	21.9759	63.7177	58.7827	30.6298	50.6843	61.6384	12.7764	28.0047	78.4168	31.9099	87.2919	31.9779	128.688	19.6251	145.587	26.6624	102.962
ko00640	Propanoate metabolism	272.572	266.133	208.345	317.486	318.176	355.697	286.6	297.816	276.468	296.993	322.977	308.129	325.431	341.412	300.603	0	300.63	0	325.881
ko00643	Styrene degradation	0	0	0	0	0	61.7842	0	0	0	0	0	0	0	0	0	0	0	0	0
ko00650	Butanoate metabolism	246.911	238.974	229.502	282.349	272.569	328.894	259.089	258.388	220.271	256.356	256.175	245.812	268.626	261.041	230.404	277.114	230.055	337.595	239.282
ko00660	C5-Branched dibasic acid metabolism	913.998	714.708	698.768	892.219	835.789	963.706	766.416	906.907	851.971	997.076	858.224	1011.86	946.604	928.893	887.899	993.725	890.299	961.011	837.103
ko00670	One carbon pool by folate	739.219	814.651	720.948	825.235	790.68	814.875	818.46	831.332	819.25	919.944	795.563	859.023	833.368	823.267	791.732	843.776	810.053	819.801	807.994
ko00680	Methane metabolism	172.379	169.116	151.409	178.553	171.416	162.88	165.279	179.734	158.967	177.57	177.397	181.372	178.884	164.745	161.508	163.081	165.111	167.707	163.24
ko00710	Carbon fixation in photosynthetic organisms	656.229	692.932	677.82	743.208	700.16	775.516	728.081	747.857	692.99	857.841	706.422	753.486	731.611	688.594	657.117	720.271	678.358	756.306	722.558
ko00720	Carbon fixation pathways in prokaryotes	468.456	504.317	390.502	560.78	526.783	616.894	504.442	553.45	510.401	621.144	531.449	546.238	554.375	549.807	511.058	577.163	520.071	634.353	525.904
ko00730	Thiamine metabolism	633.904	593.42	469.199	561.118	587.623	486.891	641.74	580.475	744.365	522.602	647.715	556.346	627.588	697.086	638.511	666.185	629.268	502.004	587.13
ko00740	Riboflavin metabolism	378.275	348.6	294.747	368.419	365.803	393.681	397.914	385.562	365.498	383.616	380.55	344.391	375.033	370.339	348.239	389.522	357.274	395.482	349.338
ko00750	Vitamin B6 metabolism	579.067	506.067	422.549	522.434	503.305	566.138	572.817	509.828	503.484	558.606	475.863	546.568	522.062	526.806	464.28	554.232	487.542	567.775	481.751
ko00760	Nicotinate and nicotinamide metabolism	526.383	528.331	418.06	496.654	490.497	478.886	506.064	532.088	506.169	591.53	479.91	497.908	474.965	443.193	429.761	443.597	430.924	442.353	478.22
ko00770	Pantothenate and CoA biosynthesis	814.604	772.404	697.653	848.431	824.793	873.648	800.301	829.107	851.806	875.909	806.646	877.876	869.532	886.157	846.315	931.635	844.602	894.219	790.945
ko00780	Biotin metabolism	696.231	490.719	388.972	740.509	656.38	828.555	590.746	723.259	571.836	799.151	715.059	852.574	812.634	898.089	858.907	962.607	836.369	903.018	720.072
ko00785	Lipoic acid metabolism	426.751	511.647	346.545	583.69	529.068	740.988	446.374	657.19	793.987	853.877	540.89	673.055	595.857	745.286	846.11	747.039	797.165	753.434	605.993
ko00790	Folate biosynthesis	594.18	522.907	496.766	549.616	527.992	623.331	596.202	580.55	534.572	689.898	515.786	607.432	554.631	570.55	626.986	597.41	613.222	599.997	568.959
ko00791	Atrazine degradation	0	0	0	0	0	0	0	0	0	0.929306	0	0	0	0	0	0	0	0	0
ko00860	Porphyrin and chlorophyll metabolism	200.692	226.66	261.646	258.932	256.491	275.595	251.611	275.411	237.217	254.441	289.462	211.403	247.869	221.867	252.172	219.662	269.368	276.79	253.019
ko00900	Terpenoid backbone biosynthesis	582.246	632.13	573.865	637.364	624.761	632.76	589.426	617.645	607.724	667.02	625.491	654.522	645.246	644.821	568.512	663.458	588.374	639.99	633.039
ko00906	Carotenoid biosynthesis	5.57196	2.13532	0.434549	1.01414	4.97468	0.447042	1.17518	4.4466	3.76071	0.267253	0.939131	0.610276	1.23023	1.23094	21.4688	0	15.9006	0.178357	5.38783
ko00908	Zeatin biosynthesis	297.134	335.484	282.366	287.708	288.339	275.601	316.688	296.695	330.96	311.069	268.754	313.154	279.36	289.784	251.842	285.707	263.947	263.065	274.452
ko00910	Nitrogen metabolism	199.382	216.64	210.306	204.901	194.6	194.008	207.379	208.805	201.023	211.484	185.946	174.719	180.519	175.301	190.233	163.356	182.28	183.608	193.991
ko00920	Sulfur metabolism	296.855	287.381	256.004	343.675	305.566	335.265	321.744	366.805	261.783	422.778	302.785	323.752	307.477	258.934	423.201	260.138	426.094	323.155	365.061
ko00930	Caprolactam degradation	18.387	12.6764	3.04882	0	0	0	0	19.6846	45.6659	2.70679	7.60268	4.56979	8.21983	13.6118	111.272	0	54.7326	0	28.9219
ko00941	Flavonoid biosynthesis	0	0	0.533541	0.849807	0	0.126665	0	0	0	0.232326	0.798279	0	0	1.2611	0	1.03749	0.193282	0	0
ko00960	Tropane, piperidine and pyridine alkaloid biosynthesis	217.622	184.147	167.886	211.057	196.077	0	215.924	218.921	0	254.438	193.888	0	0	194.38	196.303	0	187.937	0	0
ko00970	Aminoacyl-tRNA biosynthesis	729.174	754.443	654.14	744.746	753.489	703.173	710.644	740.394	750.188	771.729	768.372	800.21	778.553	803.969	711.146	815.816	717.824	718.81	757.105
ko00983	Drug metabolism - other enzymes	0	0	0	0	0	591.063	0	0	0	0	0	0	0	0	0	0	0	0	0
ko01040	Biosynthesis of unsaturated fatty acids	163.884	144.329	147.852	178.913	184.94	211.023	178.243	173.782	192.559	152.45	184.839	192.705	201.609	216.619	243.563	230.874	209.654	230.71	196.794
ko01051	Biosynthesis of ansamycins	1460.25	1527.75	2066.75	1623.06	1684.01	1877.59	1737.31	1442.43	1446.88	1318.3	1909.77	1434.79	1759.07	1660.77	1494.09	1725.52	1685.24	1870.09	1905.94
ko01053	Biosynthesis of siderophore group nonribosomal peptides	28.7238	25.8333	17.0515	22.0746	17.3752	15.0678	29.8019	36.5219	0	54.967	0	0	0	6.39604	0	0	0	0	0
ko01055	Biosynthesis of vancomycin group antibiotics	1008.5	1105.7	924.771	1294.93	1278.65	1514.91	1136.7	1105.53	1055.3	1144.13	1323.7	1536.56	1539.55	1793.75	1424.23	1951.57	1497.15	1783.88	1442.87
ko02010	ABC transporters	229.626	190.806	259.946	175.943	207.679	148.734	171.113	185.67	189.626	144.531	196.58	189.95	176.944	181.207	186.397	164.224	199.895	146.895	184.441
ko02020	Two-component system	152.255	108.313	155.258	96.3252	105.51	91.0569	105.081	108.57	120.334	79.8791	116.9	107.073	96.6872	100.666	128.524	87.9625	112.744	91.1644	94.1231
ko02030	Bacterial chemotaxis	847.78	433.712	1001.26	378.032	396.967	352.095	405.379	487.76	472.073	317.256	542.455	546.313	346.055	273.069	370.297	208.249	372.143	314.029	302.397
ko02040	Flagellar assembly	573.7	300.166	586.231	235.721	255.798	228.78	287.421	290.556	277.591	145.768	403.216	316.709	251.612	212.372	296.389	149.998	268.366	211.545	224.186
ko02060	Phosphotransferase system (PTS)	80.1791	34.6241	46.5715	29.3692	48.9715	18.7997	45.8915	26.6691	41.292	10.2281	37.7549	44.3068	33.5162	56.2689	48.0285	65.2576	45.2443	18.5446	41.1654
ko03008	Ribosome biogenesis in eukaryotes	24.9069	25.457	21.1239	25.4114	25.4447	24.6532	24.1725	25.1568	25.1206	26.8869	25.2653	26.8193	25.8028	26.5423	23.0683	27.1902	23.7002	24.8348	24.9643
ko03010	Ribosome	749.269	755.795	639.813	763.592	758.324	743.439	729.054	757.402	757.095	817.502	760.148	808.099	774.019	780.198	692.106	799.684	711.231	744.739	757.005
ko03013	RNA transport	17.7414	15.0267	24.3079	19.2929	17.9433	24.5781	18.9306	15.6277	19.0436	17.3918	14.9274	16.406	16.0017	13.7128	16.2819	14.6947	17.0749	23.5037	16.9078
ko03018	RNA degradation	285.889	254.385	226.574	270.013	270.045	277.773	265.339	271.96	268.866	287.255	261.212	289.421	267.326	280.434	306.09	282.439	296.607	278.8	271.217
ko03020	RNA polymerase	404.567	513.548	529.495	498.8	467.711	495.596	482.936	515.678	513.401	554.196	542.811	489.099	496.075	478.193	439.74	470.197	413.817	489.314	478.508
ko03030	DNA replication	535.207	550.264	475.025	556.38	558.396	555.473	532.159	542.812	548.31	586.105	549.627	585.783	557.777	576.202	497.987	591.136	518.717	559.025	558.072
ko03060	Protein export	666.338	634.075	562.27	669.476	661.161	649.388	628.636	666.97	677.82	711.614	661.973	716.678	687.641	694.588	638.946	710.228	649.635	656.473	651.523
ko03070	Bacterial secretion system	332.636	305.925	299.39	333.078	319.859	327.468	347.222	336.716	337.011	354.678	347.38	369.622	375.912	382.831	353.105	390.462	346.364	337.211	337.768
ko03410	Base excision repair	363.679	401.281	339.947	391.736	396.274	381.562	373.485	383.973	383.351	412.355	384.774	393.566	390.19	399.802	388.783	403.436	388.958	376.988	406.773
ko03420	Nucleotide excision repair	323.01	356.533	311.378	353.272	346.154	336.382	334.426	358.991	352.443	399.245	347.797	376.271	349.736	344.58	345.418	348.538	342.938	333.852	353.498
ko03430	Mismatch repair	700.4	747.843	675.233	733.868	727.561	709.028	702.709	730.317	722.054	798.605	729.394	772.24	729.216	728.972	669.918	735.582	699.871	696.242	740.834
ko03440	Homologous recombination	658.029	672.645	616.469	669.432	663.248	664.173	658.887	654.782	659.609	705.103	667.927	699.577	673.749	687.878	586.496	702.946	616.804	659.194	659.033
ko03450	Non-homologous end-joining	0.237799	6.89347	1.19021	3.34612	0.274276	0	0	0.535692	0	0.913817	2.57223	1.33388	0.98638	4.00749	0.191083	2.07497	0.66575	0.880987	1.07545
ko04112	Cell cycle - Caulobacter	689.33	647.695	621.12	673.885	669.928	681.139	646.639	681.338	688.658	736.326	640.654	696.56	652.804	628.786	612.216	640.416	626.443	655.683	637.216
ko04122	Sulfur relay system	462.886	388.649	290.22	477.615	469.679	492.111	413.193	511.092	443.192	533.913	494.55	487.698	493.812	474.428	558.744	475.629	550.094	510.986	505.216
ko04141	Protein processing in endoplasmic reticulum	20.089	26.4085	19.4397	26.8125	25.3758	26.0733	27.2223	27.7044	27.0438	30.9226	28.838	31.1186	27.8782	29.4811	21.7902	30.6836	23.7391	28.2292	26.0306
ko04146	Peroxisome	110.204	89.0625	97.6791	101.912	96.173	122.635	103.433	100.593	103.669	118.207	86.5499	113.821	93.9056	95.7875	93.5932	103.897	97.034	119.177	87.0499
ko04210	Apoptosis	18.3336	24.9634	17.9855	23.7432	21.3493	25.115	25.8604	24.7877	19.0677	32.6298	12.4677	20.319	14.3317	11.1826	7.0616	12.2349	7.59967	23.0239	13.6859
ko04512	ECM-receptor interaction	0	0	0	0	0	0	0	0	0	0	0	0	0	0	0	0	0	0	0
ko04621	NOD-like receptor signaling pathway	0	37.6193	0	0	0	36.3105	0	0	0	0	0	0	39.8038	0	0	41.9253	0	0	0
ko04626	Plant-pathogen interaction	103.751	91.3201	99.2504	91.3842	90.1069	88.0017	83.578	95.2192	68.8374	92.3394	102.376	110.973	95.684	97.4155	78.8525	99.4732	83.9817	92.2912	89.8947
ko04910	Insulin signaling pathway	35.6513	38.5454	43.8383	45.8461	43.5432	45.8266	39.9638	44.5609	36.2304	51.3087	52.2378	59.3407	48.2879	51.5578	48.2439	56.082	51.5062	50.1978	51.7681
ko04974	Protein digestion and absorption	13.6101	29.7629	21.7151	27.078	21.7419	30.6866	30.3237	28.2667	24.3218	40.1682	14.6218	19.7711	17.3137	13.3508	7.11546	14.7203	8.06202	27.2964	16.7582
ko05012	Parkinson's disease	0	2.11321	0	0	0	0	0	3.50863	0	0	0	0	0	0	0	0	0	0	0
ko05100	Bacterial invasion of epithelial cells	0	0	0	0	0	0	0	0	0	0	0	0	0	0.169856	0	0.556212	0	0	0
ko05111	Vibrio cholerae pathogenic cycle	160.651	0	80.6664	68.0038	65.5172	74.2697	134.022	0	0	0	0	0	0	0	0	0	0	0	0
ko05120	Epithelial cell signaling in Helicobacter pylori infection	58.7846	57.319	55.7946	43.1703	44.7503	27.1424	52.9778	47.1016	56.2064	48.0805	47.8413	43.5453	41.4677	43.3962	45.9623	36.3476	47.2417	19.8206	47.3566
ko05142	Chagas disease (American trypanosomiasis)	0	1.04638	0	0	4.66605	12.6665	0	0.754909	0.228503	0	0	3.17506	5.20924	0	0	0	0	15.3393	5.63298
ko05143	African trypanosomiasis	0.946798	0	1.96089	13.0127	0	0	9.24914	0	0	0.671165	5.56826	0	0	12.5253	10.5162	18.4664	14.8541	0	0
ko05146	Amoebiasis	3.01654	0.333783	0.641932	2.41903	0.580197	0.303151	0.449469	0.763093	0	0.259462	0.386633	3.44554	2.42381	0.481431	0.287843	0.552501	0.275341	0.568379	0.69974
ko05150	Staphylococcus aureus infection	0.954804	0.666686	0	0.130764	0	0.959611	1.40963	0.216449	0	1.08263	0.645054	0.0374228	0.166068	0.917154	0.325701	0.822247	0	0.516713	0

## Sheet: KO_differs
Pathway	Test-Statistic	P	FDR_P	Bonferroni_P
ko00910	13.5	0.000238563	0.0188559	0.0288662
ko01053	11.9216	0.000554877	0.0188559	0.0671402
ko04910	11.76	0.000605172	0.0188559	0.0732258
ko00472	11.2461	0.000797893	0.0188559	0.0965451
ko01055	11.2067	0.00081504	0.0188559	0.0986198
ko00010	10.6667	0.00109084	0.0188559	0.131991
ko00521	10.6667	0.00109084	0.0188559	0.131991
ko01040	9.62667	0.00191772	0.0257827	0.232045
ko04210	9.62667	0.00191772	0.0257827	0.232045
ko00561	9.12667	0.0025191	0.0277101	0.304811
ko03070	9.12667	0.0025191	0.0277101	0.304811
ko00780	8.64	0.00328861	0.0331602	0.397922
ko04974	8.16667	0.00426672	0.0397134	0.516274
ko00620	7.70667	0.00550173	0.0475506	0.665709
ko05111	7.13969	0.00753962	0.0608196	0.912294
ko00760	6.82667	0.00898067	0.0679163	1
ko00311	6.52107	0.0106604	0.0687841	1
ko00061	6.40667	0.0113693	0.0687841	1
ko00250	6.40667	0.0113693	0.0687841	1
ko00908	6.40667	0.0113693	0.0687841	1
ko00564	5.60667	0.0178923	0.103094	1
ko00120	4.86	0.0274863	0.138577	1
ko00190	4.86	0.0274863	0.138577	1
ko03013	4.86	0.0274863	0.138577	1
ko04122	4.50667	0.033763	0.163413	1
ko00121	4.16667	0.0412268	0.178159	1
ko00340	4.16667	0.0412268	0.178159	1
ko04112	4.16667	0.0412268	0.178159	1
ko00071	3.84	0.0500435	0.195331	1
ko02030	3.84	0.0500435	0.195331	1
ko05120	3.84	0.0500435	0.195331	1
ko00960	3.70886	0.0541245	0.197489	1
ko00020	3.52667	0.0603891	0.197489	1
ko00140	3.52667	0.0603891	0.197489	1
ko00240	3.52667	0.0603891	0.197489	1
ko00310	3.52667	0.0603891	0.197489	1
ko00450	3.52667	0.0603891	0.197489	1
ko00270	3.22667	0.072448	0.219155	1
ko00350	3.22667	0.072448	0.219155	1
ko00970	3.22667	0.072448	0.219155	1
ko00380	3.09188	0.0786838	0.227298	1
ko00290	2.94	0.0864107	0.227298	1
ko00400	2.94	0.0864107	0.227298	1
ko00471	2.94	0.0864107	0.227298	1
ko00511	2.94	0.0864107	0.227298	1
ko00785	2.94	0.0864107	0.227298	1
ko00540	2.66667	0.10247	0.253039	1
ko00770	2.66667	0.10247	0.253039	1
ko03018	2.66667	0.10247	0.253039	1
ko00280	2.40667	0.120819	0.292383	1
ko00520	2.16	0.141645	0.329596	1
ko03020	2.16	0.141645	0.329596	1
ko03450	1.93345	0.164381	0.356785	1
ko00230	1.92667	0.165124	0.356785	1
ko00660	1.92667	0.165124	0.356785	1
ko04141	1.92667	0.165124	0.356785	1
ko00052	1.70667	0.191418	0.373575	1
ko00281	1.70667	0.191418	0.373575	1
ko00500	1.70667	0.191418	0.373575	1
ko00633	1.70667	0.191418	0.373575	1
ko00900	1.70667	0.191418	0.373575	1
ko04146	1.70667	0.191418	0.373575	1
ko00072	1.5	0.220671	0.404564	1
ko00630	1.5	0.220671	0.404564	1
ko03030	1.5	0.220671	0.404564	1
ko03410	1.5	0.220671	0.404564	1
ko00730	1.30667	0.252999	0.45019	1
ko01051	1.30667	0.252999	0.45019	1
ko00930	1.16235	0.280978	0.478178	1
ko00330	1.12667	0.288487	0.478178	1
ko00362	1.12667	0.288487	0.478178	1
ko00510	1.12667	0.288487	0.478178	1
ko00720	1.12667	0.288487	0.478178	1
ko00640	0.960843	0.326975	0.514151	1
ko00100	0.96	0.327187	0.514151	1
ko00790	0.96	0.327187	0.514151	1
ko03060	0.96	0.327187	0.514151	1
ko05143	0.901569	0.342361	0.531099	1
ko00531	0.806667	0.369108	0.551383	1
ko02040	0.806667	0.369108	0.551383	1
ko04626	0.806667	0.369108	0.551383	1
ko00440	0.666667	0.414216	0.596669	1
ko00473	0.666667	0.414216	0.596669	1
ko00750	0.666667	0.414216	0.596669	1
ko00562	0.54	0.462433	0.650632	1
ko03010	0.54	0.462433	0.650632	1
ko05150	0.434286	0.509893	0.698305	1
ko00670	0.426667	0.513629	0.698305	1
ko02060	0.426667	0.513629	0.698305	1
ko00030	0.326667	0.567628	0.738527	1
ko02020	0.326667	0.567628	0.738527	1
ko03008	0.326667	0.567628	0.738527	1
ko03440	0.326667	0.567628	0.738527	1
ko00941	0.297391	0.585522	0.753704	1
ko00040	0.24	0.624206	0.762919	1
ko00051	0.24	0.624206	0.762919	1
ko00260	0.24	0.624206	0.762919	1
ko00740	0.24	0.624206	0.762919	1
ko00920	0.24	0.624206	0.762919	1
ko00300	0.166667	0.683091	0.810334	1
ko00480	0.166667	0.683091	0.810334	1
ko02010	0.166667	0.683091	0.810334	1
ko00627	0.156701	0.692212	0.813181	1
ko04621	0.117931	0.731289	0.841314	1
ko00053	0.106667	0.743971	0.841314	1
ko00550	0.106667	0.743971	0.841314	1
ko05146	0.106667	0.743971	0.841314	1
ko05142	0.0954872	0.757314	0.848472	1
ko00591	0.06	0.806496	0.879153	1
ko00710	0.06	0.806496	0.879153	1
ko00860	0.06	0.806496	0.879153	1
ko00312	0.0266667	0.870283	0.931896	1
ko00361	0.0266667	0.870283	0.931896	1
ko00600	0.0151327	0.902095	0.957487	1
ko00130	0.00666667	0.934925	0.958695	1
ko00360	0.00666667	0.934925	0.958695	1
ko00650	0.00666667	0.934925	0.958695	1
ko00680	0.00666667	0.934925	0.958695	1
ko00906	0	1	1	1
ko03420	0	1	1	1
ko03430	0	1	1	1
