# Supplementary material for: Comparative Analysis of Gut Microbiota between Wild and Captive Golden Snub-Nosed Monkeys
Source: Animals (Basel). 2023 May 12;13(10):1625. doi: 10.3390/ani13101625 (PMC10215246; doi:10.3390/ani13101625)
Supplement: Supplementary file 1 [file animals-13-01625-s001.zip › Table S4.xlsx]

## Sheet: number_of_taxmonic_units
ID	Group	domain	phylum	class	order	family	genus	species
R01	CC	1	10	12	14	20	28	3
R02	CC	1	10	13	16	24	39	7
R03	CC	1	10	13	15	20	29	2
R04	CC	1	10	13	15	21	36	7
R05	CC	1	10	13	16	19	29	7
R06	CC	1	5	6	8	13	19	2
R07	CC	1	8	12	15	20	33	6
R08	CC	1	10	14	15	26	39	5
R09	CC	1	9	11	12	16	28	4
R10	CC	1	9	10	10	18	33	5
R14	CW	1	8	9	10	18	26	1
R15	CW	1	10	10	12	17	20	1
R16	CW	1	8	9	10	16	24	2
R17	CW	1	8	12	14	23	35	2
R18	CW	1	10	10	12	18	23	1
R19	CW	1	7	8	9	16	25	2
R20	CW	1	11	12	13	18	27	3
R21	CW	1	7	9	10	17	26	0
R22	CW	1	9	10	11	17	20	1

## Sheet: alpha_diversity_index
Sample	Chao1	Faith_pd	Goods_coverage	Observed_species	Pielou_e	Shannon	Simpson	Group
R01	152.658	12.5913	0.972561	131.6	0.819375	5.76794	0.96361	CC
R02	127.253	14.3268	0.983972	119.1	0.831701	5.73525	0.964348	CC
R03	79.9934	10.5881	0.993728	77.2	0.808758	5.07081	0.947329	CC
R04	141.933	13.7441	0.980836	131.4	0.754661	5.31116	0.919959	CC
R05	119.422	12.0621	0.988589	113.7	0.822033	5.61331	0.950518	CC
R06	41	6.51823	1	41	0.867298	4.64659	0.942816	CC
R07	101.259	11.8715	0.989983	96.6	0.813912	5.36651	0.951839	CC
R08	127.617	15.0002	0.98284	118.3	0.694946	4.78492	0.838275	CC
R09	56.8893	8.59375	0.999042	56.7	0.788726	4.59449	0.915642	CC
R10	317.931	12.711	0.917857	169.2	0.469863	3.47739	0.609334	CC
means	126.596	11.8007	0.980941	105.48	0.767127	5.03684	0.900367
SD	72.5093	2.48156	0.0224884	36.3972	0.108659	0.662043	0.103169
R14	123.064	11.9187	0.987369	116.2	0.815	5.59115	0.956054	CW
R15	71.8026	9.01038	0.99216	67.6	0.794959	4.83186	0.941966	CW
R16	65.5207	8.63431	0.992857	61.3	0.75745	4.49743	0.925744	CW
R17	108.717	12.4406	0.98223	94.8	0.641743	4.21361	0.811579	CW
R18	63.2529	8.7824	0.990244	56.6	0.622797	3.62556	0.82124	CW
R19	52.6397	8.12656	0.994251	50	0.559854	3.15969	0.751001	CW
R20	76.8984	9.52244	0.985366	66.3	0.619191	3.74606	0.841392	CW
R21	73.5187	8.95644	0.992509	69.9	0.651874	3.99392	0.813114	CW
R22	62.5654	8.29095	0.991115	53.9	0.781352	4.49303	0.935171	CW
SD	21.8245	1.4773	0.00375448	20.217	0.087975	0.679545	0.069782
means	77.5533	9.52031	0.989789	70.7333	0.693802	4.23915	0.866362
