# Supplementary figures and images for: Comparative Analysis of Gut Microbiota between Wild and Captive Golden Snub-Nosed Monkeys
Source: MDPI journal article supplement (doi:10.3390/ani13101625), 2023-05-12

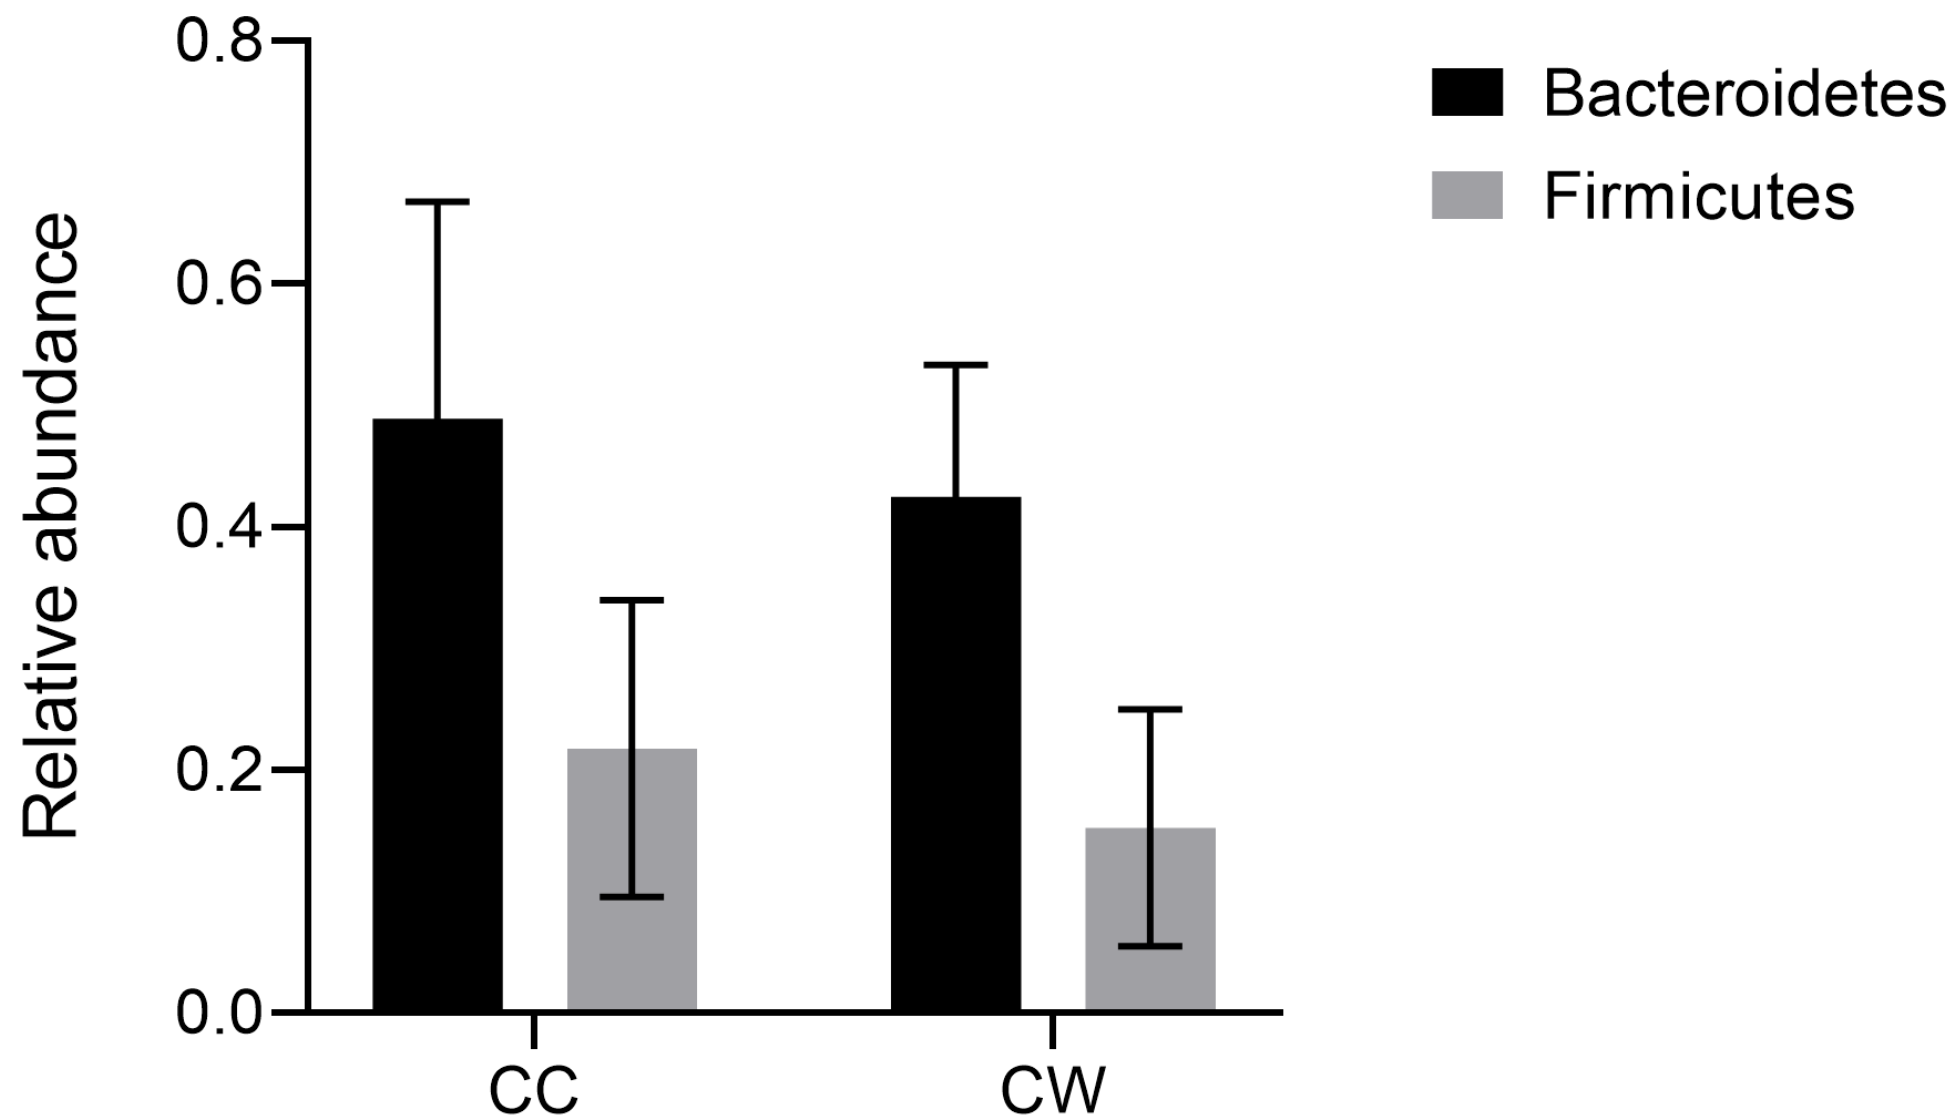

Supplement: s1 [file s1]
